# Supplementary material for: Combining transcriptome analysis and GWAS for identification and validation of marker genes in the Physalis peruviana-Fusarium oxysporum pathosystem
Source: PeerJ. 2021 Mar 22;9:e11135. doi: 10.7717/peerj.11135 (PMC7993016; doi:10.7717/peerj.11135)
Supplement: Supplemental Information 9 — Yellow color represents the 10 candidate DGEs genes selected. [file peerj-09-11135-s009.xlsx]

## Sheet: Table_S5
Supplemental Table S5: Differential expressed genes between F. oxysporum inoculated and mock-inoculated plants. Yellow color represents the 10 candidate DGEs genes selected.
Transcript ID	FPKM of inoculated_1 - SRX972116	FPKM of inoculated_2 - SRX971469	FPKM of mock-inoculated_1 - SRX980678	FPKM of mock-inoculated_2 - SRX978916	Pvalue	FDR	Gene expression Inoculated/Mock-inoculated	BLAST Hit - Swissprot	Short Description BLAST Hit	Gene ontology	ITAG2.3	ITAG Short description
TR69651_c2_g1	3597.08	4774.65	891.074	877.583	0.000414038	0.00851513	Upregulated	AOP1L_ARATH	Full=Probable 2-oxoglutarate-dependent dioxygenase AOP1.2	GO:0046872,GO:0016706	Solyc12g100170.1.1	2-oxoglutarate-dependent dioxygenase (Fragment) IPR005123 Oxoglutarate and iron-dependent oxygenase
TR16218_c0_g1	8263.48	1634.9	239.415	255.622	1.8234e-07	2.23553e-05	Upregulated	KIRO_ACTDE	Full=Kirola {ECO:0000303|PubMed:21309790}	GO:0009607,GO:0016068	Solyc05g046140.2.1	Major latex-like protein IPR000916 Bet v I allergen
TR18171_c0_g2	1771.59	1420.96	11131.3	13038.7	1.34002e-06	0.000107182	Downregulated	M030_ARATH	Full=Uncharacterized mitochondrial protein AtMg00030	GO:0005739	Solyc10g048060.1.1	Uncharacterized mitochondrial protein AtMg00030
TR1867_c0_g1	1378.29	1307.77	255.365	273.029	0.000144827	0.00380698	Upregulated	COMT1_POPKI	Full=Caffeic acid 3-O-methyltransferase 1	GO:0009809,GO:0047763	Solyc10g005060.2.1	O-methyltransferase-like protein IPR016461 O-methyltransferase, COMT, eukaryota
TR20234_c0_g1	10800.5	1199.44	97.718	103.933	3.40547e-09	1.10344e-06	Upregulated	NQR_SOLTU	Full=NAD(P)H:quinone oxidoreductase	GO:0003955	Solyc01g096420.2.1	Predicted NADPH-dependent FMN reductase IPR005025 NADPH-dependent FMN reductase
TR25174_c0_g1	1666.46	1128.93	174.586	168.109	1.6594e-06	0.000126121	Upregulated	PMT1_TOBAC	Full=Putrescine N-methyltransferase 1	GO:0009446,GO:0030750,GO:0042179	Solyc06g053510.2.1	Spermidine synthase IPR001045 Spermine synthase
TR30777_c0_g2	2083.81	975.777	218.48	256.727	4.54459e-05	0.00158756	Upregulated	RS62_ARATH	Full=40S ribosomal protein S6-2	GO:0003735,GO:0042274,GO:0022627,GO:0009506,GO:0005829,GO:0006412,GO:0022626,GO:0009735,GO:0006364,GO:0005886	Solyc12g096300.1.1	40S ribosomal protein S6 IPR014401 Ribosomal protein S6, eukaryotic
TR34929_c0_g3	75.527	755.881	3698.31	3875.82	0.000519712	0.00999085	Downregulated	ADH3_SOLTU	Full=Alcohol dehydrogenase 3	GO:0005737,GO:0004022,GO:0008270	Solyc06g059740.2.1	Alcohol dehydrogenase 2 IPR002085 Alcohol dehydrogenase superfamily, zinc-containing
TR46518_c0_g1	683.231	747.112	49.055	50.302	4.70524e-09	1.45058e-06	Upregulated	PERN1_TOBAC	Full=Peroxidase N1	GO:0005576,GO:0004601,GO:0020037,GO:0006979,GO:0046872,GO:0042744	Solyc01g105070.2.1	Peroxidase IPR002016 Haem peroxidase, plant_fungal_bacterial
TR53199_c0_g1	1004.51	632.712	102.818	104.724	2.72262e-06	0.000186323	Upregulated	GST23_MAIZE	Full=Glutathione transferase GST 23	GO:0004364,GO:0006952	Solyc01g081270.2.1	Glutathione S-transferase IPR004046 Glutathione S-transferase, C-terminal
TR10247_c0_g1	1654.24	539.484	181.94	197.071	0.000362148	0.00769208	Upregulated	RS92_ARATH	Full=40S ribosomal protein S9-2	GO:0015935,GO:0009506,GO:0006412,GO:0003735,GO:0016020,GO:0019843,GO:0005829	Solyc05g007250.2.1	Ribosomal protein IPR001912 Ribosomal protein S4
TR19460_c0_g1	1154.95	532.302	140.7	143.126	0.000100468	0.00285611	Upregulated	21KD_DAUCA	Full=21 kDa protein	GO:0004857,GO:0030599	Solyc08g007450.1.1	Pectinesterase IPR006501 Pectinesterase inhibitor
TR19645_c0_g1	150.834	516.84	51.608	51.007	0.000248594	0.00572018	Upregulated	HY6H_HYONI	Full=Hyoscyamine 6-dioxygenase	GO:0005506,GO:0031418,GO:0047998	Solyc11g072200.1.1	1-aminocyclopropane-1-carboxylate oxidase 3 IPR005123 Oxoglutarate and iron-dependent oxygenase
TR36959_c1_g2	232.007	508.491	46.394	37.391	7.68449e-06	0.000416405	Upregulated	MYB48_ARATH	Full=Transcription factor MYB48	GO:0003700,GO:0006351,GO:0003677,GO:0005634,GO:0006355,GO:0009751	Solyc11g073120.1.1	MYB transcription factor IPR015495 Myb transcription factor
TR68470_c3_g1	3438.89	499.865	240.174	232.927	0.000412537	0.00850349	Upregulated	H2B_GOSHI	Full=Histone H2B	1,GO:0000786,GO:0005634,GO:0003677	Solyc11g007920.1.1	Histone H2B IPR000558 Histone H2B
TR51071_c0_g1	716.982	476.712	107.718	114.337	0.000110557	0.0030822	Upregulated	CADH2_TOBAC	Full=Probable cinnamyl alcohol dehydrogenase 2	GO:0045551,GO:0008270,GO:0009809,GO:0052747	Solyc01g107590.2.1	Cinnamyl alcohol dehydrogenase IPR002085 Alcohol dehydrogenase superfamily, zinc-containing
TR54890_c1_g1	1520.02	367.317	152.632	136.812	0.000346865	0.00743208	Upregulated	C7A22_PANGI	Full=Cytochrome P450 CYP749A22	GO:0005506,GO:0004497,GO:0020037,GO:0016021,GO:0016705	Solyc05g011940.2.1	Cytochrome P450
TR2640_c1_g1	874.737	358.833	88.9	84.795	3.26803e-05	0.00124428	Upregulated	MBF1B_ARATH	Full=Multiprotein-bridging factor 1b	GO:0045893,GO:0005737,GO:0003713,GO:0005730,GO:0005634,GO:0006351,GO:0043565	Solyc07g062400.2.1	Multiprotein bridging factor 1c IPR001387 Helix-turn-helix type 3
TR6761_c0_g1	284.142	357.232	64.253	71.211	0.0003208	0.00697719	Upregulated	RS29_WHEAT	Full=40S ribosomal protein S29	GO:0006412,GO:0003735,GO:0005840,GO:0046872	Solyc06g073430.2.1	40S ribosomal protein S29 IPR001209 Ribosomal protein S14
TR36791_c1_g3	128.841	333.09	30.106	27.192	0.000400048	0.00830812	Upregulated	U91A1_ARATH	Full=UDP-glycosyltransferase 91A1	0,GO:0016758	Solyc11g010780.1.1	Glucosyltransferase IPR002213 UDP-glucuronosyl_UDP-glucosyltransferase
TR51139_c0_g1	212.91	325.765	9.279	12.229	2.29394e-12	8.37004e-09	Upregulated	ACCH1_ARATH	Full=1-aminocyclopropane-1-carboxylate oxidase homolog 1	GO:0005737,GO:0050590,GO:0046872,GO:0031418	Solyc09g089770.2.1	1-aminocyclopropane-1-carboxylate oxidase-like protein IPR005123 Oxoglutarate and iron-dependent oxygenase
TR50623_c2_g1	190.181	316.983	48.303	48.994	0.000213735	0.00513773	Upregulated	ASPG2_ARATH	Full=Protein ASPARTIC PROTEASE IN GUARD CELL 2	GO:0004190,GO:0003677	Solyc00g005000.2.1	Aspartic proteinase nepenthesin I IPR001461 Peptidase A1
TR53915_c0_g1	1685.19	316.936	73.271	67.787	3.51089e-06	0.00022718	Upregulated	OST1B_ARATH	Full=Dolichyl-diphosphooligosaccharide--protein glycosyltransferase subunit 1B	GO:0004579,GO:0009505,GO:0016021,GO:0005774,GO:0006486,GO:0005886,GO:0005783,GO:0005789	Solyc05g056130.2.1	Dolichyl-diphosphooligosaccharide--protein glycosyltransferase subunit 1 IPR007676 Ribophorin I
TR9712_c3_g3	78.546	310.5	25.413	25.562	5.37594e-05	0.00181026	Upregulated	H32_WHEAT	Full=Histone H3.2	GO:0005634,GO:0000786,GO:0003677	Solyc10g008910.1.1	Histone H3 IPR000164 Histone H3
TR25187_c0_g3	166.42	303.962	25.459	19.397	5.25329e-07	5.0703e-05	Upregulated	DEF2_PINSY	Full=Defensin-2	GO:0005576,GO:0031640,GO:0050832	Solyc07g009290.2.1	Pit1 protein
TR44411_c0_g1	1380.53	269.877	76.945	76.256	2.45162e-05	0.000996781	Upregulated	0	0	0	Solyc01g108360.2.1	Copper ion binding protein IPR008972 Cupredoxin
TR63820_c0_g1	372.04	232.3	62.513	58.7	0.000254724	0.00583165	Upregulated	Y8948_DICDI	Full=Putative methyltransferase DDB_G0268948	GO:0032259,GO:0008757,GO:0045335	Solyc04g040180.2.1	S-adenosylmethionine-dependent methyltransferase (Fragment) IPR013217 Methyltransferase type 12
TR18160_c0_g1	361.019	227.817	30.528	37.713	1.62925e-06	0.000124499	Upregulated	OPR1_ARATH	Full=12-oxophytodienoate reductase 1	GO:0031408,GO:0016629,GO:0010181,GO:0005737	Solyc10g086220.1.1	Flavin oxidoreductase_NADH oxidase IPR001155 NADH:flavin oxidoreductase_NADH oxidase, N-terminal
TR36784_c0_g1	109.253	219.578	637.082	654.84	0.000493774	0.00963694	Downregulated	DCHS_SOLLC	Full=Histidine decarboxylase	0,GO:0030170,GO:0019752,GO:0004398	Solyc08g006740.2.1	Decarboxylase family protein IPR002129 Pyridoxal phosphate-dependent decarboxylase
TR16918_c0_g1	1505.46	215.122	83.279	79.068	8.02131e-05	0.00244289	Upregulated	GPX2_ARATH	Full=Probable glutathione peroxidase 2	GO:0004602,GO:0005829,GO:0005634,GO:0005886,GO:0006979	Solyc06g073460.2.1	Glutathione peroxidase IPR000889 Glutathione peroxidase
TR10234_c0_g1	133.308	213.745	28.611	23.345	1.96132e-05	0.000834851	Upregulated	CVIF1_ARATH	Full=Cell wall / vacuolar inhibitor of fructosidase 1	GO:0005773,GO:0005618,GO:0004857,GO:0043086,GO:0030599	Solyc12g099200.1.1	Invertase inhibitor IPR006501 Pectinesterase inhibitor
TR61348_c1_g1	151.766	207.723	1124	1115.77	2.34311e-05	0.000956337	Downregulated	LOX16_SOLTU	Full=Linoleate 9S-lipoxygenase 6	GO:0005737,GO:0031408,GO:0046872,GO:0016702	Solyc08g014000.2.1	Lipoxygenase IPR001246 Lipoxygenase, plant
TR65087_c0_g1	77.344	197.707	22.269	20.94	8.98013e-05	0.00265014	Upregulated	SBT17_ARATH	Full=Subtilisin-like protease SBT1.7 {ECO:0000303|PubMed:16193095}	GO:0004252,GO:0048359,GO:0080001,GO:0005576,GO:0048046,GO:0005618,GO:0009505,GO:0010214	Solyc02g092670.1.1	Subtilisin-like protease IPR015500 Peptidase S8, subtilisin-related
TR69291_c0_g1	27.197	197.68	10.184	8.445	1.83021e-05	0.000794128	Upregulated	PER4_VITVI	Full=Peroxidase 4 {ECO:0000250|UniProtKB:Q42578}	GO:0020037,GO:0042744,GO:0006979,GO:0046872,GO:0005576,GO:0004601	Solyc00g072400.2.1	Peroxidase 1 IPR002016 Haem peroxidase, plant_fungal_bacterial
TR69305_c0_g2	6029.32	193.265	48.449	48.876	2.05492e-06	0.000150031	Upregulated	C84A1_ARATH	Full=Cytochrome P450 84A1	GO:0005506,GO:0005783,GO:0009699,GO:0009809,GO:0004497,GO:0016021,GO:0010224,GO:0016709,GO:0016020,GO:0020037	Solyc02g084570.2.1	Cytochrome P450
TR19503_c0_g1	3250.08	191.732	64.062	71.955	1.40604e-05	0.000654352	Upregulated	COPE1_ARATH	Full=Coatomer subunit epsilon-1	GO:0030663,GO:0015031,GO:0005774,GO:0005198,GO:0006890	Solyc02g030250.2.1	Coatomer protein epsilon subunit family protein IPR006822 Coatomer, epsilon subunit
TR53206_c0_g1	159.842	180.427	26.502	25.092	1.41507e-05	0.000655974	Upregulated	PER21_ARATH	Full=Peroxidase 21	GO:0005829,GO:0004601,GO:0048511,GO:0020037,GO:0046872,GO:0042744,GO:0050832,GO:0006979	Solyc09g007520.2.1	Peroxidase IPR000823 Plant peroxidase
TR36770_c0_g2	92.243	178.162	915.989	926.679	6.20151e-05	0.00202595	Downregulated	PME22_SOLLC	Full=Pectinesterase 2.2	GO:0005829,GO:0030598,GO:0005774,GO:0042545,GO:0031640,GO:0050832,GO:0045490,GO:0030599,GO:0005618,GO:0045330,GO:0009617,GO:0017148,GO:0004857,GO:0005576	Solyc02g080210.2.1	Pectinesterase IPR000070 Pectinesterase, catalytic
TR18356_c0_g1	311.756	174.886	6.825	6.071	5.05441e-13	3.20996e-09	Upregulated	PER1_ARAHY	Full=Cationic peroxidase 1	GO:0046872,GO:0042744,GO:0020037,GO:0004601,GO:0006979,GO:0005576	Solyc05g050880.2.1	Peroxidase IPR002016 Haem peroxidase, plant_fungal_bacterial
TR63756_c0_g2	199.213	172.981	4.808	3.682	1.47479e-13	1.21723e-09	Upregulated	0	0	0	Solyc06g061230.2.1	Unknown Protein IPR009632 Putative metallocarboxypeptidase inhibitor
TR1796_c1_g1	287.161	171.618	51.486	44.419	0.000387464	0.00812114	Upregulated	0	0	0	Solyc01g109900.2.1	Unknown Protein
TR61337_c0_g1	81.639	161.615	1689.1	1765.93	5.55254e-08	8.75411e-06	Downregulated	SUS2_SOLTU	Full=Sucrose synthase	0,GO:0016157,GO:0009058,GO:0005985	Solyc07g042550.2.1	Sucrose synthase IPR012820 Sucrose synthase, plants and cyanobacteria IPR000368 Sucrose synthase
TR8986_c0_g1	719.854	160.19	36.977	44.654	1.37632e-05	0.000644595	Upregulated	RL8_SOLLC	Full=60S ribosomal protein L8	GO:0006412,GO:0005840,GO:0003735	Solyc07g063890.2.1	50S ribosomal protein L2 IPR002171 Ribosomal protein L2
TR18330_c0_g1	1138.02	160.028	28.473	29.511	6.17449e-07	5.73273e-05	Upregulated	OPR1_SOLLC	Full=12-oxophytodienoate reductase 1	GO:0005737,GO:0031408,GO:0016629,GO:0010181	Solyc11g032130.1.1	NADPH dehydrogenase 3 IPR001155 NADH:flavin oxidoreductase_NADH oxidase, N-terminal
TR13548_c0_g1	1125.79	151.645	40.903	42.405	9.56381e-06	0.000493002	Upregulated	QCR9_SOLTU	Full=Cytochrome b-c1 complex subunit 9	GO:0006122,GO:0005750	Solyc11g068400.1.1	Ubiquinol-cytochrome C reductase IPR008027 Ubiquinol-cytochrome C reductase, UQCRX_QCR9-like
TR9185_c0_g1	101.693	149.957	2.116	3.76	8.45536e-13	4.47486e-09	Upregulated	EXB15_ORYSJ	Full=Expansin-B15	GO:0005618,GO:0005576,GO:0016020,GO:0071555,GO:0019953	Solyc03g093390.2.1	Expansin protein IPR007117 Pollen allergen_expansin, C-terminal
TR50662_c0_g3	102.307	145.691	14.21	12.934	3.52578e-07	3.83417e-05	Upregulated	BXL1_ARATH	Full=Beta-D-xylosidase 1	GO:0048046,GO:0005975,GO:0010214,GO:0005578,GO:0009505,GO:0046556	Solyc11g044910.1.1	Beta-xylosidase 1 IPR001764 Glycoside hydrolase, family 3, N-terminal
TR55219_c0_g1	11946.2	145.535	27.069	38.872	8.1554e-07	7.09497e-05	Upregulated	RUXG_ARATH	Full=Probable small nuclear ribonucleoprotein G	GO:0005829,GO:0000398,GO:0005732,GO:0003723,GO:0005681	Solyc11g006820.1.1	Small nuclear ribonucleoprotein G IPR006649 Like-Sm ribonucleoprotein, eukaryotic and archaea-type, core
TR10288_c0_g1	101.3	145.413	1113.6	1089.99	7.76274e-07	6.8473e-05	Downregulated	DES_CAPAN	Full=9-divinyl ether synthase	GO:0005506,GO:0020037,GO:0016829,GO:0004497,GO:0016705	Solyc10g007960.1.1	Allene oxide synthase IPR001128 Cytochrome P450
TR9062_c0_g1	609.545	136.638	25.635	21.567	6.46238e-07	5.91373e-05	Upregulated	NLTP2_TOBAC	Full=Non-specific lipid-transfer protein 2	GO:0006869,GO:0008289	Solyc10g075070.1.1	Non-specific lipid-transfer protein IPR013770 Plant lipid transfer protein and hydrophobic protein, helical
TR5828_c0_g1	31.247	136.631	2.814	1.731	9.2142e-10	4.36698e-07	Upregulated	LTPG2_ARATH	Full=Non-specific lipid transfer protein GPI-anchored 2	GO:0031225,GO:0046658,GO:0042335,GO:0008289,GO:0006869,GO:0005886	Solyc09g082280.2.1	Non-specific lipid-transfer protein IPR003612 Plant lipid transfer protein_seed storage_trypsin-alpha amylase inhibitor
TR47752_c0_g1	85.64	135.017	21.832	22.248	1.4369e-05	0.000663189	Upregulated	SNR40_HUMAN	Full=U5 small nuclear ribonucleoprotein 40 kDa protein	GO:0003676,GO:0008270,GO:0004519,GO:0004190,GO:0003964,GO:0015074	Solyc03g059100.1.1	WD-repeat protein 57 IPR020472 G-protein beta WD-40 repeat, region
TR19015_c0_g1	484.141	131.979	36.164	40.611	5.67903e-05	0.00189027	Upregulated	UCHL3_BOVIN	Full=Ubiquitin carboxyl-terminal hydrolase isozyme L3	GO:0005654,GO:0004843,GO:0070062,GO:0006511,GO:0005737,GO:0016579	Solyc06g060850.2.1	Ubiquitin carboxyl-terminal hydrolase isozyme L3 IPR001578 Peptidase C12, ubiquitin carboxyl-terminal hydrolase 1
TR35306_c0_g1	100.196	130.344	640.096	660.912	3.65887e-05	0.00135729	Downregulated	C94A1_VICSA	Full=Cytochrome P450 94A1	GO:0005506,GO:0016021,GO:0005789,GO:0004497,GO:0016705,GO:0020037	Solyc07g006890.1.1	Cytochrome P450
TR70604_c0_g2	125.232	129.442	31.655	28.954	8.3004e-05	0.00249358	Upregulated	BGAL_SOLLC	Full=Beta-galactosidase	GO:0004565,GO:0030246,GO:0005975	Solyc03g121540.2.1	Beta-galactosidase IPR019801 Glycoside hydrolase, family 35, conserved site IPR001944 Glycoside hydrolase, family 35 IPR000922 D-galactoside_L-rhamnose binding SUEL lectin
TR45902_c0_g1	356.282	128.099	29.232	33.882	2.93335e-05	0.0011443	Upregulated	MTP5_ORYSJ	Full=Metal tolerance protein 5	GO:0016021,GO:0008324,GO:0005774	Solyc05g054730.2.1	Cation diffusion facilitator 10 IPR002524 Cation efflux protein
TR68074_c0_g1	1350.09	127.157	32.56	32.48	4.0538e-06	0.0002549	Upregulated	0	0	0	Solyc01g009850.2.1	Unknown Protein
TR32565_c0_g1	159.916	126.845	699.74	706.991	9.27013e-05	0.00270306	Downregulated	NFD4_ARATH	Full=Protein NUCLEAR FUSION DEFECTIVE 4 {ECO:0000303|PubMed:16698901}	GO:0009651,GO:0010197,GO:0016021,GO:0006810,GO:0000741	Solyc01g111350.2.1	Nodulin family protein IPR010658 Nodulin-like
TR10917_c1_g3	55.375	122.572	22.146	13.271	0.00042128	0.00860279	Upregulated	GSTX4_TOBAC	Full=Probable glutathione S-transferase	GO:0009734,GO:0004364	Solyc12g011300.1.1	Glutathione transferase IPR004046 Glutathione S-transferase, C-terminal
TR49862_c0_g1	113.573	122.505	13.266	19.632	8.16566e-06	0.00043316	Upregulated	Y5102_ARATH	Full=Serine/threonine-protein kinase At5g01020	GO:0004674,GO:0005524,GO:0005886	Solyc08g074980.2.1	ATP binding _ serine-threonine kinase IPR002290 Serine_threonine protein kinase
TR40109_c0_g1	18.532	122.321	9.954	9.871	7.15752e-05	0.002266	Upregulated	Y5102_ARATH	Full=Serine/threonine-protein kinase At5g01020	GO:0004674,GO:0005524,GO:0005886	Solyc08g074980.2.1	ATP binding _ serine-threonine kinase IPR002290 Serine_threonine protein kinase
TR25639_c0_g1	388.363	120.924	26.418	29.644	1.10953e-05	0.000548944	Upregulated	NUXM_NEUCR	Full=NADH-ubiquinone oxidoreductase 20.9 kDa subunit	GO:0016021,GO:0008137,GO:0005743	Solyc07g065280.2.1	Os08g0431500 protein (Fragment)
TR29241_c0_g1	1177.98	117.757	63.287	60.016	0.000226158	0.00533074	Upregulated	ALL12_OLEEU	Full=Isoflavone reductase-like protein	GO:0016491,GO:0005737	Solyc04g080550.2.1	Phenylcoumaran benzylic ether reductase IPR008030 NmrA-like
TR57473_c0_g1	978.149	112.752	57.091	60.29	0.000378861	0.00798298	Upregulated	NDUA2_ARATH	Full=NADH dehydrogenase [ubiquinone] 1 alpha subcomplex subunit 2	GO:0005739,GO:0055114,GO:0005747	Solyc06g075810.2.1	NADH dehydrogenase, alpha subcomplex, subunit 2
TR48012_c0_g1	121.232	112.488	566.157	555.091	0.000154492	0.00400795	Downregulated	ATPAM_SOYBN	Full=ATP synthase subunit alpha, mitochondrial	GO:0005743,GO:0015986,GO:0005524,GO:0045261,GO:0046933,GO:0015991,GO:0046961	Solyc00g042130.1.1	ATP synthase subunit alpha IPR005294 ATPase, F1 complex, alpha subunit
TR59001_c0_g1	43.176	112.339	484.205	460.754	0.000153592	0.00399441	Downregulated	PAL2_TOBAC	Full=Phenylalanine ammonia-lyase	GO:0009800,GO:0006559,GO:0005737,GO:0045548	Solyc10g086180.1.1	Phenylalanine ammonia-lyase IPR005922 Phenylalanine ammonia-lyase
TR2643_c0_g1	747.639	109.85	32.752	32.292	1.74038e-05	0.000766492	Upregulated	RUXF_ARATH	Full=Probable small nuclear ribonucleoprotein F	GO:0005681,GO:0003723,GO:0005732,GO:0000398	Solyc10g081370.1.1	Small nuclear ribonucleoprotein F IPR016487 Small nuclear ribonucleoprotein SmF
TR51532_c0_g1	24.472	107.219	1048.09	1055.66	3.6847e-07	3.93588e-05	Downregulated	C94A1_VICSA	Full=Cytochrome P450 94A1	GO:0005506,GO:0016021,GO:0005789,GO:0004497,GO:0016705,GO:0020037	Solyc07g006890.1.1	Cytochrome P450
TR70048_c0_g1	95.164	106.527	9.708	6.479	1.25893e-07	1.65876e-05	Upregulated	GUN6_ARATH	Full=Endoglucanase 6	GO:0030245,GO:0008810,GO:0071555,GO:0030246,GO:0005576	Solyc08g082250.2.1	Endoglucanase 1 IPR008928 Six-hairpin glycosidase-like IPR012341 Six-hairpin glycosidase IPR018221 Glycoside hydrolase, family 9, active site IPR001701 Glycoside hydrolase, family 9
TR31664_c0_g1	91.335	103.706	521.404	517.065	6.95117e-05	0.00222242	Downregulated	B2_DAUCA	Full=B2 protein	0	Solyc08g082610.2.1	Genomic DNA chromosome 5 P1 clone MJC20 IPR013089 Kelch related
TR687_c1_g1	55.375	103.082	574.24	579.055	1.52662e-05	0.000691532	Downregulated	UGDH3_ARATH	Full=UDP-glucose 6-dehydrogenase 3	GO:0005829,GO:0003979,GO:0005975,GO:0005634,GO:0005618,GO:0052546,GO:0051287,GO:0006065	Solyc02g067080.2.1	UDP-D-glucose dehydrogenase IPR014028 UDP-glucose_GDP-mannose dehydrogenase, dimerisation and substrate-binding
TR25128_c0_g1	211.388	101.196	28.503	30.443	0.000208348	0.0050426	Upregulated	FCA_ARATH	Full=Flowering time control protein FCA	GO:0000166,GO:0003723,GO:0030154,GO:0009908,GO:0005634	Solyc08g007370.2.1	CUGBP Elav-like family member 5 IPR015903 Ribonucleoprotein, BRUNO-like
TR32165_c0_g1	484.484	100.654	29.079	29.957	3.10889e-05	0.00119944	Upregulated	SORCN_SCHJA	Full=Sorcin	GO:0005509,GO:0005737	Solyc01g112170.2.1	Calcium-dependent protein kinase IPR011992 EF-Hand type
TR53900_c0_g1	2160.99	99.521	54.737	53.138	7.77201e-05	0.0024007	Upregulated	RETOL_ARATH	Full=Reticuline oxidase-like protein	GO:0009505,GO:0031225,GO:0009506,GO:0005773,GO:0008762,GO:0048046,GO:0005739,GO:0050660,GO:0006979,GO:0005886,GO:0005829	Solyc02g070090.1.1	FAD-binding domain-containing protein IPR006094 FAD linked oxidase, N-terminal
TR4477_c0_g1	88.88	98.518	22.047	18.339	0.000418744	0.00856587	Upregulated	RAX2_ARATH	Full=Transcription factor RAX2	GO:0006351,GO:0009751,GO:0007275,GO:0005634,GO:0003700,GO:0003677	Solyc09g008250.2.1	MYB transcription factor IPR015495 Myb transcription factor
TR13436_c0_g1	253.558	96.91	26.157	23.173	3.2593e-05	0.00124422	Upregulated	Y283_BACHD	Full=Uncharacterized isomerase BH0283	GO:0016853,GO:0009058	Solyc09g064940.2.1	Phenazine biosynthesis protein PhzF family IPR003719 Phenazine biosynthesis PhzC_PhzF protein
TR47725_c0_g2	29.406	94.259	777.529	757.222	1.44657e-06	0.000112584	Downregulated	SBT17_ARATH	Full=Subtilisin-like protease SBT1.7 {ECO:0000303|PubMed:16193095}	GO:0004252,GO:0048359,GO:0080001,GO:0005576,GO:0048046,GO:0005618,GO:0009505,GO:0010214	Solyc10g084320.1.1	Subtilisin-like protease IPR015500 Peptidase S8, subtilisin-related
TR44363_c1_g1	37.874	93.35	333.261	312.489	0.000145917	0.00382929	Downregulated	RBOHC_SOLTU	Full=Respiratory burst oxidase homolog protein C	GO:0004601,GO:0050664,GO:0016021,GO:0005509	Solyc03g117980.2.1	Respiratory burst oxidase-like protein IPR013121 Ferric reductase, NAD binding
TR33228_c0_g1	83.186	91.356	17.185	12.613	3.66981e-05	0.00135976	Upregulated	BAG2_ARATH	Full=BAG family molecular chaperone regulator 2	0	Solyc06g035720.2.1	BCL-2 binding anthanogene-1 IPR003103 Apoptosis regulator Bcl-2 protein, BAG
TR7777_c0_g1	257.362	91.2	31.279	29.691	0.000355028	0.00757122	Upregulated	0	0	0	Solyc06g065180.2.1	SLL1 protein
TR71081_c0_g1	629.501	89.539	41.8	28.946	0.00012736	0.00343311	Upregulated	MIRA_SYNDU	Full=Miraculin	GO:0004866	Solyc03g098740.1.1	Kunitz trypsin inhibitor IPR011065 Kunitz inhibitor ST1-like
TR49942_c0_g1	10.702	89.193	5.59	1.896	2.85315e-06	0.000192355	Upregulated	C87A3_ORYSJ	Full=Cytochrome P450 87A3	GO:0020037,GO:0004497,GO:0016705,GO:0016021,GO:0005506,GO:0030659	Solyc08g080430.1.1	Cytochrome P450
TR6622_c0_g2	59.45	88.155	12.231	10.333	2.43764e-05	0.00099237	Upregulated	RRNAD_HUMAN	Full=Protein RRNAD1	GO:0000179,GO:0016021	Solyc07g066340.2.1	UPF0431 protein C1orf66 homolog
TR51738_c0_g2	1304.12	87.728	4.195	4.896	1.21613e-09	5.29002e-07	Upregulated	PGLR4_ARATH	Full=Polygalacturonase At1g48100	GO:0005975,GO:0005618,GO:0071555,GO:0004650,GO:0005576	Solyc04g008230.2.1	Polygalacturonase IPR012334 Pectin lyase fold
TR39733_c0_g1	30.731	87.118	12.415	7.912	0.000237254	0.00553547	Upregulated	YZ37_SYNY3	Full=Uncharacterized sugar kinase slr0537	GO:0016773,GO:0016301	Solyc04g080580.2.1	Kinase PfkB family IPR011611 Carbohydrate_purine kinase
TR68441_c0_g1	19.048	86.521	330.063	374.111	0.000317283	0.00691965	Downregulated	C98A2_SOYBN	Full=Cytochrome P450 98A2	GO:0016021,GO:0005506,GO:0004497,GO:0020037,GO:0016705	Solyc01g096670.2.1	Cytochrome P450
TR1884_c0_g2	26.534	84.215	817.305	774.332	2.45275e-07	2.83217e-05	Downregulated	TI10A_ARATH	Full=Protein TIFY 10A	GO:0005634,GO:1900067,GO:0006351,GO:0006355,GO:0009753,GO:0009555,GO:0042742,GO:0009908,GO:0009867	Solyc12g009220.1.1	Jasmonate ZIM-domain protein 1 IPR010399 Tify
TR11297_c0_g1	32.499	80.743	639.49	668.62	7.89966e-07	6.9406e-05	Downregulated	0	0	0	Solyc07g062700.2.1	Sodium_calcium exchanger family protein IPR004837 Sodium_calcium exchanger membrane region
TR69286_c0_g1	42.194	79.658	9.072	10.646	5.22789e-05	0.00177421	Upregulated	C82C4_ARATH	Full=Cytochrome P450 82C4	GO:0016021,GO:0016020,GO:0071281,GO:0005506,GO:0098542,GO:0044550,GO:0004497,GO:0042343,GO:0016709,GO:0020037	Solyc10g039210.2.1	Cytochrome P450
TR21291_c0_g1	31.615	79.536	8.144	5.531	8.30225e-06	0.000437923	Upregulated	XTH32_ARATH	Full=Probable xyloglucan endotransglucosylase/hydrolase protein 32	GO:0042546,GO:0071555,GO:0048046,GO:0033946,GO:0016998,GO:0005886,GO:0005618,GO:0016762,GO:0010411	Solyc11g066270.1.1	Xyloglucan endotransglucosylase_hydrolase 9 IPR016455 Xyloglucan endotransglucosylase_hydrolase
TR65295_c0_g1	1388.51	79.393	34.055	37.454	4.7186e-05	0.00162863	Upregulated	ATP5E_IPOBA	Full=ATP synthase subunit epsilon, mitochondrial	GO:0046961,GO:0000275,GO:0015986,GO:0046933	Solyc06g063220.2.1	ATP synthase subunit epsilon mitochondrial IPR006721 ATPase, F1 complex, epsilon subunit, mitochondrial
TR52733_c0_g1	917.619	79.115	15.713	20.118	2.092e-06	0.000152361	Upregulated	0	0	0	Solyc01g088040.2.1	Unknown Protein
TR17684_c0_g1	491.995	78.478	30.858	30.082	0.000125811	0.00340346	Upregulated	UBCP_ARATH	Full=Ubiquitin-like domain-containing CTD phosphatase	GO:0004721,GO:0005634	Solyc01g103850.2.1	Ubiquitin-like domain containing CTD phosphatase 1 IPR011943 HAD-superfamily hydrolase, subfamily IIID
TR36791_c1_g2	32.474	77.772	10.552	4.802	2.79556e-05	0.00109864	Upregulated	U91A1_ARATH	Full=UDP-glycosyltransferase 91A1	GO:0016758	Solyc00g227860.1.1	UDP-glucosyltransferase IPR002213 UDP-glucuronosyl_UDP-glucosyltransferase
TR53944_c0_g1	36.401	77.745	465.464	499.987	5.71423e-06	0.000336018	Downregulated	ERF4_NICSY	Full=Ethylene-responsive transcription factor 4	GO:0005634,GO:0003677,GO:0003700,GO:0006952,GO:0009873,GO:0006351	Solyc07g053740.1.1	Ethylene-responsive transcription factor 4 IPR001471 Pathogenesis-related transcriptional factor and ERF, DNA-binding
TR43372_c0_g1	930.383	77.176	44.806	42.029	0.000275484	0.00618651	Upregulated	0	0	0	Solyc03g119810.1.1	Unknown Protein
TR31223_c0_g1	283.479	75.928	12.246	10.419	2.23248e-07	2.61588e-05	Upregulated	BURPH_ORYSJ	Full=BURP domain-containing protein 17	0	Solyc01g109470.2.1	BURP domain-containing protein IPR004873 BURP
TR54354_c0_g1	80.927	75.006	16.717	18.786	0.000463342	0.00924181	Upregulated	NLTP_HELAN	Full=Non-specific lipid-transfer protein	GO:0008289,GO:0006869	Solyc08g067510.1.1	Non-specific lipid-transfer protein IPR013770 Plant lipid transfer protein and hydrophobic protein, helical
TR51513_c1_g1	136.155	74.117	471.782	479.556	0.000229621	0.00538906	Downregulated	WRK40_ARATH	Full=Probable WRKY transcription factor 40	GO:0005634,GO:0050832,GO:0031347,GO:0006351,GO:0010200,GO:0009611,GO:0045892,GO:0002237,GO:0003700,GO:0043565,GO:0009751,GO:0042742,GO:0044212	Solyc06g068460.2.1	WRKY transcription factor 1 IPR003657 DNA-binding WRKY
TR17532_c0_g1	10.628	74.056	318.484	272.786	0.000200169	0.00486544	Downregulated	Y1725_ARATH	Full=Putative receptor-like protein kinase At1g72540	GO:0005524,GO:0004674	Solyc06g062920.2.1	ATP binding _ serine-threonine kinase IPR001245 Tyrosine protein kinase
TR42789_c0_g1	705.887	73.391	32.261	23.651	7.47638e-05	0.00233437	Upregulated	0	0	0	Solyc12g096450.1.1	Zinc finger family protein IPR003604 Zinc finger, U1-type
TR19629_c0_g1	150.416	71.676	10.13	9.166	1.14575e-06	9.30492e-05	Upregulated	0	0	0	Solyc01g094470.2.1	Unknown Protein
TR35613_c0_g2	593.001	71.452	21.502	23.831	2.09242e-05	0.000879425	Upregulated	BGAL_SOLLC	Full=Beta-galactosidase	GO:0004565,GO:0030246,GO:0005975	Solyc12g008840.1.1	Beta-galactosidase IPR001944 Glycoside hydrolase, family 35
TR11221_c0_g1	108.713	69.078	12.891	11.524	2.14181e-05	0.000892535	Upregulated	CSLE1_ARATH	Full=Cellulose synthase-like protein E1	GO:0000139,GO:0005886,GO:0071555,GO:0005789,GO:0005783,GO:0030244,GO:0016021,GO:0016760	Solyc07g065660.2.1	Cellulose synthase IPR005150 Cellulose synthase
TR23888_c0_g1	10.285	69.004	528.705	462.188	2.2131e-06	0.000159858	Downregulated	PAL2_TOBAC	Full=Phenylalanine ammonia-lyase	GO:0009800,GO:0006559,GO:0005737,GO:0045548	Solyc10g086180.1.1	Phenylalanine ammonia-lyase IPR005922 Phenylalanine ammonia-lyase
TR23833_c1_g1	24.374	68.855	365.79	390.484	2.51416e-05	0.0010147	Downregulated	SPE1_PEA	Full=Arginine decarboxylase	0,GO:0009446,GO:0008792,GO:0008295,GO:0006527	Solyc10g054440.1.1	Arginine decarboxylase IPR002985 Arginine decarboxylase
TR55209_c0_g1	50.982	68.834	12.492	12.064	0.000146045	0.00382948	Upregulated	0	0	0	0	0
TR60445_c0_g1	44.281	68.705	12.883	13.122	0.000408658	0.00844825	Upregulated	TRIP4_HUMAN	Full=Activating signal cointegrator 1 {ECO:0000303|PubMed:10454579}	GO:0044389,GO:0002020,GO:0003713,GO:0035035,GO:0030520,GO:0005654,GO:0005737,GO:0005634,GO:0006366,GO:0005829,GO:0030331,GO:0005815,GO:0016922,GO:0008270,GO:1901998,GO:0045893	Solyc03g116140.2.1	Activating signal cointegrator 1 IPR009349 Zinc finger, C2HC5-type
TR39796_c1_g1	4.197	68.136	2.661	2.601	7.21854e-06	0.00040003	Upregulated	SOT5_ARATH	Full=Cytosolic sulfotransferase 5	0,GO:0005737,GO:1990135,GO:0008146,GO:0009812	Solyc05g011870.1.1	Steroid sulfotransferase 3 IPR000863 Sulfotransferase
TR1926_c0_g1	109.597	67.505	15.298	19.099	0.000187352	0.00464417	Upregulated	GRXC6_ARATH	Full=Glutaredoxin-C6	GO:0009055,GO:0045454,GO:0015035,GO:0005737	Solyc11g069940.1.1	Glutaredoxin IPR011905 Glutaredoxin-like, plant II
TR71054_c0_g2	155.939	67.091	15.153	19.89	9.73454e-05	0.00279233	Upregulated	0	0	0	Solyc08g076880.2.1	Unknown Protein
TR23827_c0_g1	91.777	66.806	805.971	843.231	5.17877e-08	8.31842e-06	Downregulated	C3H29_ARATH	Full=Zinc finger CCCH domain-containing protein 29	GO:0050832,GO:0046872,GO:0003677,GO:0010200,GO:0009409,GO:0006355,GO:0005634,GO:0003700	Solyc05g052570.2.1	Zinc finger CCCH domain-containing protein 66 IPR002110 Ankyrin
TR56407_c0_g1	10.776	65.945	2.024	1.614	5.44045e-08	8.6812e-06	Upregulated	BAMO_GLYUR	Full=Beta-amyrin 11-oxidase	GO:0005506,GO:0004497,GO:0020037,GO:0016705,GO:0016021	Solyc10g007860.2.1	Cytochrome P450 ent-kaurenoic acid oxidase IPR002401 Cytochrome P450, E-class, group I
TR55238_c0_g2	22.067	64.948	4.279	1.872	1.71016e-06	0.00012872	Upregulated	0	0	0	0	0
TR71801_c0_g1	31.099	64.853	8.642	11.673	0.00019217	0.00471938	Upregulated	0	0	0	Solyc07g053640.1.1	Arabinogalactan-protein
TR50582_c0_g1	49.239	64.162	8.635	8.743	1.62927e-05	0.000731207	Upregulated	AB14G_ARATH	Full=ABC transporter G family member 14	GO:0016887,GO:0016021,GO:0005886,GO:0005524,GO:0010588,GO:0010222,GO:0006810	Solyc08g075430.2.1	ABC transporter G family member 14 IPR013525 ABC-2 type transporter
TR13906_c0_g1	539.982	62.012	18.205	19.17	1.44202e-05	0.000664586	Upregulated	NDUB7_ARATH	Full=NADH dehydrogenase [ubiquinone] 1 beta subcomplex subunit 7	GO:0005739,GO:0045271,GO:0031966,GO:0005747,GO:0008137,GO:0005758,GO:0009853	Solyc04g008490.1.1	NADH dehydrogenase IPR008698 NADH:ubiquinone oxidoreductase, B18 subunit
TR514_c0_g1	277.244	61.944	8.374	11.03	3.55463e-07	3.8503e-05	Upregulated	NRPBC_ARATH	Full=DNA-directed RNA polymerases II, IV and V subunit 12	GO:0005666,GO:0006383,GO:0006360,GO:0005736,GO:0005665,GO:0000419,GO:0000418,GO:0003677,GO:0003899,GO:0046872	Solyc10g007650.2.1	DNA-directed RNA polymerases I II and III subunit RPABC4 IPR006591 RNA polymerase Rbp10
TR14414_c1_g1	78.988	61.578	10.184	7.889	4.10935e-06	0.000256109	Upregulated	FSPM_SOLLC	Full=Fruit-specific protein	0	Solyc07g049140.2.1	Metallocarboxypeptidase inhibitor IPR009632 Putative metallocarboxypeptidase inhibitor
TR944_c0_g1	54.811	61.53	732.3	768.08	1.06792e-08	2.53064e-06	Downregulated	LEA2R_ARATH	Full=Desiccation-related protein At2g46140	GO:0009269	Solyc01g095150.2.1	Late embryogenesis abundant protein (Fragment) IPR013990 Water Stress and Hypersensitive response
TR45594_c0_g2	208.59	60.649	21.87	21.896	0.000326171	0.00706675	Upregulated	DNJ15_ARATH	Full=Chaperone protein dnaJ 15	GO:0042026,GO:0051082,GO:0008092,GO:0009958,GO:0005856,GO:0000139,GO:0005789,GO:0051087	Solyc05g009160.2.1	Chaperone protein dnaJ 15 IPR003095 Heat shock protein DnaJ
TR25187_c0_g2	79.504	60.303	8.842	8.727	2.05528e-06	0.000150031	Upregulated	0	0	0	Solyc07g009310.2.1	Pit1 protein
TR50638_c0_g1	46.76	59.631	10.72	10.466	0.000161172	0.00414455	Upregulated	MCM5_ARATH	Full=DNA replication licensing factor MCM5	GO:0006270,GO:0006268,GO:0005737,GO:0000347,GO:0003678,GO:0003682,GO:0005634,GO:0005524,GO:0003688,GO:0042555,GO:0007049	Solyc07g005020.2.1	DNA replication licensing factor IPR008048 MCM protein 5
TR18342_c0_g1	23.76	59.421	2.477	2.828	4.08804e-08	6.86833e-06	Upregulated	DAT_CATRO	Full=Deacetylvindoline O-acetyltransferase	GO:0047162	Solyc08g014490.1.1	Hydroxycinnamoyl CoA quinate transferase IPR003480 Transferase
TR21416_c0_g1	18.483	58.96	789.001	806.498	8.55815e-09	2.17405e-06	Downregulated	PUMP5_ARATH	Full=Mitochondrial uncoupling protein 5	GO:0015992,GO:0006835,GO:0006839,GO:0005743,GO:0016021,GO:0017077,GO:0005310	Solyc05g051400.2.1	Mitochondrial 2-oxoglutarate_malate carrier protein IPR001993 Mitochondrial substrate carrier
TR11292_c2_g7	645.554	58.173	42.245	34.869	0.000519298	0.00999085	Upregulated	ACT11_SOLTU	Full=Actin-97	GO:0005524,GO:0005856,GO:0005737	Solyc04g011500.2.1	Actin 4 IPR004000 Actin_actin-like
TR71600_c0_g1	209.204	56.851	5.889	4.223	1.24386e-08	2.81094e-06	Upregulated	BEATH_CLABR	Full=Acetyl-CoA-benzylalcohol acetyltransferase	GO:0016747	Solyc01g105550.1.1	Hydroxycinnamoyl CoA quinate transferase IPR003480 Transferase
TR44388_c1_g4	63.132	56.722	895.783	941.132	1.37758e-10	1.13788e-07	Downregulated	HSP72_SOLLC	Full=Heat shock cognate 70 kDa protein 2	GO:0005524	Solyc06g076020.2.1	heat shock protein IPR013126 Heat shock protein 70
TR31396_c1_g1	75.135	55.82	12.944	10.466	0.000188038	0.00465572	Upregulated	0	0	0	Solyc04g015520.2.1	DNA binding protein IPR005516 Remorin, C-terminal region
TR53199_c0_g2	45.581	54.877	4.593	4.285	4.01745e-08	6.85042e-06	Upregulated	GSTU7_ARATH	Full=Glutathione S-transferase U7	GO:0009407,GO:0005829,GO:0005737,GO:0004364,GO:0009636,GO:0009751	Solyc09g063150.2.1	Glutathione S-transferase IPR017933 Glutathione S-transferase_chloride channel, C-terminal
TR61352_c5_g1	23.638	53.541	242.49	228.736	9.10436e-05	0.00267685	Downregulated	RF2A_ORYSJ	Full=Transcription factor RF2a	GO:0006351,GO:0005634,GO:0003700,GO:0043565	Solyc01g110480.2.1	BZIP transcription factor family protein expressed IPR011616 bZIP transcription factor, bZIP-1
TR69305_c0_g1	2417.88	52.741	34.515	33.811	5.59453e-05	0.00187196	Upregulated	C84A1_ARATH	Full=Cytochrome P450 84A1	GO:0005506,GO:0005783,GO:0009699,GO:0009809,GO:0004497,GO:0016021,GO:0010224,GO:0016709,GO:0016020,GO:0020037	Solyc02g084570.2.1	Cytochrome P450
TR38924_c0_g1	70.937	52.619	353.49	353.225	2.95578e-05	0.00115022	Downregulated	ALIS1_ARATH	Full=ALA-interacting subunit 1	GO:0000139,GO:0005789,GO:0016021,GO:0005794,GO:0015914,GO:0031902	Solyc05g054800.1.1	Cell cycle control protein IPR005045 Protein of unknown function DUF284, transmembrane eukaryotic
TR40414_c0_g1	69.563	52.321	427.482	380.393	8.58727e-06	0.000449226	Downregulated	COX1_RAPSA	Full=Cytochrome c oxidase subunit 1	GO:0005507,GO:0005743,GO:0070469,GO:0005886,GO:0016021,GO:0022900,GO:0020037,GO:0004129,GO:0005506,GO:0009060,GO:0006119	Solyc11g063610.1.1	Cytochrome c oxidase subunit 1 IPR000883 Cytochrome c oxidase, subunit I
TR34947_c0_g3	81.418	51.771	14.915	9.941	0.000461381	0.00922007	Upregulated	CNBL7_ORYSJ	Full=Calcineurin B-like protein 7	GO:0005886,GO:0005509	Solyc03g083320.2.1	Calcineurin B-like calcium binding protein IPR018248 EF hand
TR31293_c0_g1	3.608	51.154	2.4	2.57	1.61451e-05	0.000727196	Upregulated	EXPB3_ARATH	Full=Expansin-B3	GO:0071555,GO:0019953,GO:0016020,GO:0009506,GO:0006949,GO:0005576,GO:0005618	Solyc07g054170.2.1	Expansin B1 IPR007117 Pollen allergen_expansin, C-terminal
TR62769_c0_g2	88.635	50.7	10.536	13.858	9.84618e-05	0.00281672	Upregulated	0	0	0	Solyc04g040180.2.1	S-adenosylmethionine-dependent methyltransferase (Fragment) IPR013217 Methyltransferase type 12
TR36723_c0_g1	115.856	50.123	1360.84	1396.86	3.21643e-10	1.92707e-07	Downregulated	EXO_ARATH	Full=Protein EXORDIUM	GO:0009505,GO:0005794,GO:0005618,GO:0005615,GO:0048046,GO:0009741	Solyc04g074410.1.1	Os06g0220000 protein (Fragment) IPR006766 Phosphate-induced protein 1 conserved region
TR21294_c1_g1	171.182	50.008	669.627	630.759	9.23107e-05	0.00269911	Downregulated	TET8_ARATH	Full=Tetraspanin-8	GO:0009506,GO:0016020,GO:0016021,GO:0005886,GO:0005794	Solyc07g006280.2.1	Senescence-associated protein IPR000301 Tetraspanin, subgroup
TR12993_c0_g1	57.118	49.879	358.835	356.845	7.31428e-06	0.000403927	Downregulated	STAD_RICCO	Full=Acyl-[acyl-carrier-protein] desaturase, chloroplastic	GO:0009507,GO:0045300,GO:0046872,GO:0006633	Solyc06g053480.2.1	Stearoyl-acyl carrier protein desaturase IPR005067 Fatty acid desaturase, type 2
TR9481_c0_g1	319.414	49.418	17.016	14.54	3.43287e-05	0.00129603	Upregulated	KXDL1_DANRE	Full=KxDL motif-containing protein 1	GO:0016192	Solyc02g069820.2.1	UPF0459 protein C19orf50 homolog IPR019371 Domain of unknown function KxDL
TR25102_c0_g1	55.596	49.127	10.299	8.617	0.000143959	0.00379674	Upregulated	SPEE_VIBVU	Full=Polyamine aminopropyltransferase {ECO:0000255|HAMAP-Rule:MF_00198}	GO:0004766,GO:0008295,GO:0005737	Solyc09g090690.2.1	Unknown Protein
TR53912_c0_g1	35.051	49.127	221.386	215.066	9.1757e-05	0.00269035	Downregulated	KCS11_ARATH	Full=3-ketoacyl-CoA synthase 11	GO:0009409,GO:0033807,GO:0006633,GO:0016021,GO:0009416	Solyc06g065560.1.1	Fatty acid elongase 3-ketoacyl-CoA synthase IPR012392 Very-long-chain 3-ketoacyl-CoA synthase
TR35888_c0_g1	37.506	48.706	3.55	4.661	1.04972e-07	1.44298e-05	Upregulated	EXPB2_ARATH	Full=Putative expansin-B2	GO:0016020,GO:0019953,GO:0009828,GO:0009826,GO:0005618,GO:0005576	Solyc01g090810.2.1	Expansin protein IPR007112 Expansin 45, endoglucanase-like
TR14022_c1_g1	535.024	48.259	21.395	21.771	0.000100066	0.00285489	Upregulated	TBL33_ARATH	Full=Protein trichome birefringence-like 33	GO:0016021	Solyc06g050920.2.1	Os03g0291800 protein (Fragment) IPR004253 Protein of unknown function DUF231, plant
TR33206_c0_g1	19.293	47.207	4.11	4.881	7.75765e-06	0.00041894	Upregulated	0	0	0	0	0
TR29228_c0_g1	46.833	47.16	345.407	305.579	6.81941e-06	0.000387329	Downregulated	0	0	0	Solyc01g080500.2.1	Unknown Protein
TR11557_c0_g1	18.483	47.099	311.406	336.602	2.50991e-06	0.00017478	Downregulated	ACCO1_ARATH	Full=1-aminocyclopropane-1-carboxylate oxidase 1	GO:0016706,GO:0009815,GO:0006952,GO:0009693,GO:0071732,GO:0031418,GO:0046872,GO:0071398,GO:0071281,GO:0051365	Solyc07g026650.2.1	1-aminocyclopropane-1-carboxylate oxidase IPR005123 Oxoglutarate and iron-dependent oxygenase
TR25046_c2_g1	53.043	47.079	10.628	10.294	0.000230162	0.00539377	Upregulated	TKPR1_ARATH	Full=Tetraketide alpha-pyrone reductase 1	GO:0048316,GO:0016491,GO:0010584,GO:0009555,GO:0080110,GO:0005783,GO:0050662,GO:0005634	Solyc06g061280.2.1	Cinnamoyl-CoA reductase-like protein-binding domain
TR30769_c0_g3	35.64	46.726	331.428	320.793	4.30548e-06	0.000264954	Downregulated	0	0	0	Solyc01g107090.2.1	Beta-1 4-xylosidase
TR44811_c0_g1	309.694	46.57	10.076	5.217	7.91238e-07	6.9406e-05	Upregulated	MIF2_ARATH	Full=Mini zinc finger protein 2	GO:0006351,GO:0042803,GO:0005737,GO:0046872,GO:0007275,GO:0006355,GO:0005634,GO:0003677	Solyc02g087970.1.1	Zinc finger-homeodomain protein 1 (Fragment) IPR006456 ZF-HD homeobox protein Cys_His-rich dimerisation region
TR67224_c0_g1	176.803	46.543	14.156	10.458	3.4366e-05	0.00129603	Upregulated	PLA3_ORYSJ	Full=Phospholipase A1-II 3	GO:0008970,GO:0005576,GO:0016042	Solyc02g077000.2.1	Lipase-like IPR002921 Lipase, class 3
TR43947_c0_g1	16.028	46.38	280.786	298.599	8.06694e-06	0.000431101	Downregulated	NIA_SOLLC	Full=Nitrate reductase [NADH]	GO:0009703,GO:0030151,GO:0006809,GO:0020037,GO:0050464,GO:0042128,GO:0043546	Solyc11g013810.1.1	Nitrate reductase IPR012137 Nitrate reductase NADH dependant
TR65269_c0_g1	323.808	45.681	9.302	4.638	7.12343e-07	6.46279e-05	Upregulated	COX23_YEAST	Full=Cytochrome c oxidase-assembly factor COX23, mitochondrial	GO:0005737,GO:0005739,GO:0033108,GO:0005758	Solyc01g088770.2.1	Os04g0665000 protein (Fragment) IPR010625 CHCH
TR35867_c0_g1	30.24	45.505	224.477	206.636	2.71609e-05	0.00107405	Downregulated	0	0	0	Solyc04g078750.2.1	Harpin-induced protein IPR010847 Harpin-induced 1
TR30781_c0_g1	67.918	45.247	231.355	241.161	0.000481192	0.00952011	Downregulated	RGP3_ORYSJ	Full=UDP-arabinopyranose mutase 3	GO:0030244,GO:0016866,GO:0016020,GO:0009506,GO:0071555,GO:0052691,GO:0005794,GO:0033356	Solyc03g114860.2.1	Alpha-1 4-glucan-protein synthase IPR004901 Alpha-1,4-glucan-protein synthase, UDP-forming
TR31079_c0_g2	40.353	45.105	304.443	281.975	7.78085e-06	0.000419479	Downregulated	4CLLA_ARATH	Full=Oxalate--CoA ligase {ECO:0000305}	GO:0048046,GO:0010030,GO:0005524,GO:0005737,GO:0009506,GO:0009507,GO:0009570,GO:0009735,GO:0010214,GO:0033611,GO:0046686,GO:0050203,GO:0050832	Solyc03g025720.2.1	Long-chain-fatty-acid--CoA ligase IPR000873 AMP-dependent synthetase and ligase
TR6601_c0_g1	6.136	45.078	3.811	5.445	0.000313015	0.00685009	Upregulated	0	0	0	Solyc07g053640.1.1	Arabinogalactan-protein
TR9778_c1_g1	109.302	44.746	364.433	370.209	3.31883e-05	0.0012606	Downregulated	WRK33_ARATH	Full=Probable WRKY transcription factor 33	GO:0009408,GO:0043565,GO:0006970,GO:0042742,GO:0034605,GO:0010120,GO:0010200,GO:0010508,GO:0009651,GO:0006351,GO:0009414,GO:0005634,GO:0050832,GO:0044212,GO:0070370,GO:0009409,GO:0003700	Solyc06g066370.2.1	WRKY transcription factor 1 IPR003657 DNA-binding WRKY
TR31101_c0_g1	84.118	44.359	13.082	12.284	0.000330397	0.00713217	Upregulated	THA1_ARATH	Full=Probable low-specificity L-threonine aldolase 1	GO:0008732,GO:0006567,GO:0006545,GO:0005829,GO:0004793	Solyc04g009960.2.1	L-allo-threonine aldolase IPR001597 Aromatic amino acid beta-eliminating lyase_threonine aldolase
TR56087_c0_g1	38.782	44.067	352.685	311.376	1.86194e-06	0.00013814	Downregulated	Y5133_ARATH	Full=BTB/POZ domain-containing protein At5g41330	GO:0051260,GO:0016567	Solyc08g081230.1.1	Potassium channel tetramerization domain-containing protein IPR003131 Potassium channel, voltage dependent, Kv, tetramerisation
TR972_c1_g4	16.912	43.667	208.082	219.923	8.37448e-05	0.00250871	Downregulated	RING1_GOSHI	Full=E3 ubiquitin-protein ligase RING1	GO:0016567,GO:0016874,GO:0008270	Solyc05g018050.1.1	RING finger protein 44 IPR018957 Zinc finger, C3HC4 RING-type
TR66806_c1_g2	6.676	43.633	4.164	3.306	0.000212316	0.00511137	Upregulated	IPO5_HUMAN	Full=Importin-5	GO:0003676,GO:0008270,GO:0004519,GO:0004190,GO:0003964,GO:0015074	Solyc01g044360.2.1	Importin beta-3 IPR011989 Armadillo-like helical
TR44388_c1_g5	121.207	43.518	950.612	991.113	1.19655e-08	2.73348e-06	Downregulated	HSP71_SOLLC	Full=Heat shock cognate 70 kDa protein 1	GO:0005524	Solyc06g076020.2.1	heat shock protein IPR013126 Heat shock protein 70
TR35359_c0_g1	75.208	43.518	363.834	372.481	1.6452e-05	0.000736838	Downregulated	HSF24_SOLPE	Full=Heat shock factor protein HSF24	GO:0006351,GO:0009408,GO:0043565,GO:0005634,GO:0003700	Solyc02g090820.2.1	Heat stress transcription factor-type, DNA-binding
TR58789_c0_g1	86.941	43.437	10.644	11.579	0.000188753	0.00465708	Upregulated	BABL_CUCSA	Full=Basic blue protein	GO:0009055,GO:0046872,GO:0055114	Solyc01g104400.2.1	Blue copper protein IPR003245 Plastocyanin-like
TR70057_c1_g1	26.485	43.057	4.946	5.648	8.68855e-06	0.000453777	Upregulated	AGD11_ARATH	Full=Probable ADP-ribosylation factor GTPase-activating protein AGD11	GO:0005096,GO:0046872	Solyc12g040800.1.1	C2 domain-containing protein IPR018029 C2 membrane targeting protein
TR13538_c0_g1	150.146	42.481	16.372	13.443	0.000445644	0.00898474	Upregulated	ATG8I_ARATH	Full=Autophagy-related protein 8i	GO:0005874,GO:0000421,GO:0006508,GO:0000407,GO:0006995,GO:0006914,GO:0015031,GO:0005829,GO:0000422,GO:0000045,GO:0033110,GO:0019776,GO:0019898,GO:0019786,GO:0061025,GO:0019779,GO:0044804	Solyc01g068060.2.1	Autophagy-related protein 8
TR54210_c0_g1	23.515	42.182	250.695	290.467	5.69811e-06	0.000335692	Downregulated	0	0	0	Solyc02g092790.2.1	Arabinogalactan
TR34141_c0_g1	62.322	42.121	531.304	544.538	1.35197e-07	1.75944e-05	Downregulated	PDC4_ARATH	Full=Pyruvate decarboxylase 4	GO:0000287,GO:0030976,GO:0004737	Solyc10g076510.1.1	Pyruvate decarboxylase IPR012110 Pyruvate decarboxylase_indolepyruvate decarboxylase
TR37274_c0_g3	42.857	42.06	229.96	243.017	3.53112e-05	0.00132538	Downregulated	PPOB_SOLLC	Full=Polyphenol oxidase B, chloroplastic	0,GO:0046148,GO:0009543,GO:0004097,GO:0046872	Solyc08g074680.2.1	Polyphenol oxidase IPR002227 Tyrosinase
TR10842_c0_g3	186.278	41.755	16.564	14.516	0.000198787	0.0048407	Upregulated	C71A4_SOLME	Full=Cytochrome P450 71A4	GO:0005506,GO:0020037,GO:0004497,GO:0016021,GO:0016705	Solyc03g112010.2.1	Cytochrome P450
TR61359_c1_g2	9.622	41.619	119.934	109.041	0.000418933	0.00856587	Downregulated	PHO19_ARATH	Full=Phosphate transporter PHO1 homolog 9	GO:0006817,GO:0005886,GO:0016021	Solyc02g088220.2.1	Xenotropic and polytropic retrovirus receptor IPR004342 EXS, C-terminal
TR41375_c0_g1	19.219	41.538	171.588	184.333	0.000153198	0.00398742	Downregulated	0	0	0	Solyc01g110480.2.1	BZIP transcription factor family protein expressed IPR011616 bZIP transcription factor, bZIP-1
TR45932_c0_g1	97.128	41.504	13.527	8.821	0.000109033	0.0030542	Upregulated	13S2_FAGES	Full=13S globulin seed storage protein 2	GO:0045735	Solyc01g104100.2.1	Legumin-like protein IPR011051 Cupin, RmlC-type
TR692_c0_g1	23.687	41.49	5.33	3.807	7.0393e-06	0.000393594	Upregulated	PUP3_ARATH	Full=Purine permease 3	GO:0005345,GO:0016021,GO:0016020,GO:0006863	Solyc04g074880.2.1	Purine permease family protein IPR004853 Protein of unknown function DUF250
TR66852_c0_g1	227.785	41.219	18.281	12.683	0.000161193	0.00414455	Upregulated	MIOX4_ARATH	Full=Inositol oxygenase 4	GO:0005506,GO:0050113,GO:0019310,GO:0005737,GO:0019853	Solyc12g008650.1.1	Inositol oxygenase IPR007828 Protein of unknown function DUF706
TR18335_c0_g1	62.665	40.826	229.062	247.263	0.000224883	0.00532112	Downregulated	Y1725_ARATH	Full=Putative receptor-like protein kinase At1g72540	GO:0004674,GO:0005524,GO:0005886	Solyc06g062920.2.1	ATP binding _ serine-threonine kinase IPR001245 Tyrosine protein kinase
TR8790_c0_g1	14.85	40.622	621.531	704.171	8.17886e-10	4.05799e-07	Downregulated	PDC1_ARATH	Full=Pyruvate decarboxylase 1	GO:0030976,GO:0000287,GO:0034059,GO:0016020,GO:0005829,GO:0004737	Solyc10g076510.1.1	Pyruvate decarboxylase IPR012110 Pyruvate decarboxylase_indolepyruvate decarboxylase
TR37092_c0_g1	54.32	39.571	8.458	8.077	6.28403e-05	0.00204792	Upregulated	C82C2_ARATH	Full=Cytochrome P450 82C2	GO:0044550,GO:0042343,GO:0004497,GO:0005506,GO:0016020,GO:0020037,GO:0016709,GO:0016021,GO:0098542,GO:0071456	Solyc06g073570.2.1	Cytochrome P450
TR8275_c3_g1	55.719	39.503	367.323	353.272	1.31566e-05	0.000622617	Downregulated	SUI1_MAIZE	Full=Protein translation factor SUI1 homolog	GO:0006417,GO:0003743	Solyc07g064620.1.1	Translation initiation factor SUI1 IPR005874 Eukaryotic translation initiation factor SUI1
TR20647_c0_g1	29.823	39.015	401.394	326.911	4.7029e-07	4.66675e-05	Downregulated	HSF24_SOLPE	Full=Heat shock factor protein HSF24	GO:0006351,GO:0009408,GO:0043565,GO:0005634,GO:0003700	Solyc02g090820.2.1	Heat stress transcription factor-type, DNA-binding
TR71672_c0_g1	35.272	38.988	221.931	202.758	4.28916e-05	0.00152175	Downregulated	ERF60_ARATH	Full=Ethylene-responsive transcription factor ERF060	GO:0009873,GO:0006351,GO:0005634,GO:0003700,GO:0003677	Solyc04g072900.1.1	Ethylene responsive transcription factor 2b IPR001471 Pathogenesis-related transcriptional factor and ERF, DNA-binding
TR6599_c0_g1	104.761	38.717	2.324	0.893	1.54837e-11	2.45834e-08	Upregulated	TAS14_SOLLC	Full=Abscisic acid and environmental stress-inducible protein TAS14	GO:0006950,GO:0009415	Solyc02g084850.2.1	Unknown Protein IPR000167 Dehydrin
TR24350_c1_g1	35.493	38.066	375.437	357.941	5.70729e-07	5.39373e-05	Downregulated	ATPAM_NICPL	Full=ATP synthase subunit alpha, mitochondrial	GO:0005743,GO:0046933,GO:0045261,GO:0015986,GO:0015991,GO:0005524,GO:0046961	Solyc11g039980.1.1	ATP synthase subunit alpha IPR018118 ATPase, F1_A1 complex, alpha_beta subunit, N-terminal
TR17534_c0_g1	574.445	37.876	23.097	23.228	0.000258598	0.0058864	Upregulated	NDS5B_ARATH	Full=NADH dehydrogenase [ubiquinone] iron-sulfur protein 5-B	GO:0005747,GO:0005739,GO:0055114,GO:0005758	Solyc11g005880.1.1	NADH-ubiquinone oxidoreductase kD subunit
TR63245_c0_g1	34.855	37.482	8.627	7.904	0.000400892	0.00832021	Upregulated	C90A1_ARATH	Full=Cytochrome P450 90A1	GO:0010268,GO:0020037,GO:0010224,GO:0010584,GO:0004497,GO:0016132,GO:0016021,GO:0005506,GO:0016705,GO:0009911,GO:0048657	Solyc04g080650.2.1	Cytochrome P450
TR41316_c0_g1	54.467	37.36	9.67	10.513	0.000518993	0.00999085	Upregulated	C72A1_CATRO	Full=Secologanin synthase	GO:0009820,GO:0005774,GO:0005506,GO:0004497,GO:0016021,GO:0020037,GO:0016705,GO:0050616	Solyc07g043460.2.1	Cytochrome P450 IPR002401 Cytochrome P450, E-class, group I
TR52725_c0_g1	106.062	37.265	13.788	11.767	0.0004429	0.00894079	Upregulated	PPAF2_IPOBA	Full=Purple acid phosphatase 2	GO:0003993,GO:0005576,GO:0046872	Solyc01g110060.2.1	Purple acid phosphatase IPR015914 Purple acid phosphatase, N-terminal
TR28416_c0_g1	195.826	37.238	15.398	16.624	0.000469627	0.0093437	Upregulated	0	0	0	Solyc03g112290.2.1	Unknown Protein
TR65258_c0_g1	1988.72	37.198	26.05	22.867	5.13585e-05	0.00175359	Upregulated	ANK1_MOUSE	Full=Ankyrin-1	GO:0055072,GO:0006888,GO:0051117,GO:0005886,GO:0006779,GO:0048821,GO:0015672,GO:0008093,GO:0007165,GO:0014731,GO:0030863,GO:0016020,GO:0019899,GO:0016529,GO:0072661,GO:0030507	Solyc08g005910.2.1	Ankyrin repeat domain protein IPR002110 Ankyrin
TR70523_c4_g1	39.764	37.028	306.206	313.993	3.33728e-06	0.000218951	Downregulated	COX1_ORYSJ	Full=Cytochrome c oxidase subunit 1	GO:0004129,GO:0009060,GO:0005743,GO:0006119,GO:0005886,GO:0070469,GO:0020037,GO:0016021,GO:0022900,GO:0005739,GO:0005506,GO:0005507	Solyc07g019510.2.1	Cytochrome c oxidase subunit 1 IPR000883 Cytochrome c oxidase, subunit I
TR4747_c0_g2	0	36.757	140.201	170.976	0.000292893	0.00649477	Downregulated	PATL5_ARATH	Full=Patellin-5	GO:0009507,GO:0007049,GO:0006810,GO:0008289,GO:0016021,GO:0051301	Solyc11g051160.1.1	Phosphatidylinositol transfer protein SFH5 IPR001251 Cellular retinaldehyde-binding_triple function, C-terminal
TR14058_c2_g2	0	36.696	1.449	1.222	5.3931e-05	0.00181412	Upregulated	0	0	0	0	0
TR52693_c0_g1	49.362	36.038	4.992	3.055	3.05363e-07	3.41426e-05	Upregulated	PER1_ARAHY	Full=Cationic peroxidase 1	GO:0046872,GO:0042744,GO:0020037,GO:0004601,GO:0006979,GO:0005576	Solyc06g082420.2.1	Peroxidase 3 IPR002016 Haem peroxidase, plant_fungal_bacterial
TR53859_c0_g1	27.81	35.821	313.982	309.535	3.69369e-07	3.93588e-05	Downregulated	PDC1_PEA	Full=Pyruvate decarboxylase 1	GO:0004737,GO:0030976,GO:0000287	Solyc02g077240.2.1	Pyruvate decarboxylase IPR012110 Pyruvate decarboxylase_indolepyruvate decarboxylase
TR66803_c0_g1	57.83	35.787	286.982	291.556	4.53186e-06	0.000275728	Downregulated	NAC2_ARATH	Full=NAC domain-containing protein 2	GO:0009611,GO:0005634,GO:0009788,GO:0003700,GO:0006351,GO:0003677	Solyc04g009440.2.1	NAC domain protein protein
TR44245_c0_g1	21.821	35.475	145.837	138.52	0.000365066	0.00773335	Downregulated	CML30_ARATH	Full=Probable calcium-binding protein CML30	GO:0005509	Solyc02g088090.1.1	Calmodulin-like protein IPR011992 EF-Hand type
TR10913_c1_g2	39.666	35.468	224.047	218.959	6.13901e-05	0.00201175	Downregulated	APR3_ARATH	Full=5'-adenylylsulfate reductase 3, chloroplastic	GO:0009973,GO:0009507,GO:0019344,GO:0033741,GO:0000103,GO:0019419,GO:0045454,GO:0051539,GO:0046872	Solyc02g080640.2.1	Phosphoadenosine phosphosulfate reductase IPR013766 Thioredoxin domain
TR19511_c0_g1	10.972	35.407	5.069	3.423	0.000134199	0.00358398	Upregulated	RNLE_SOLLC	Full=Extracellular ribonuclease LE	GO:0033897,GO:0005618,GO:0005615,GO:0003723	Solyc05g007950.2.1	Ribonuclease T2 IPR001568 Ribonuclease T2
TR44329_c0_g3	27.933	35.346	867.962	891.716	2.37231e-12	8.37004e-09	Downregulated	FAD3C_SESIN	Full=Omega-3 fatty acid desaturase, chloroplastic	GO:0006636,GO:0031969,GO:0016717	Solyc06g051400.2.1	Omega-3 fatty acid desaturase IPR005804 Fatty acid desaturase, type 1
TR66194_c0_g1	16.298	35.007	2.646	2.452	5.30187e-07	5.10168e-05	Upregulated	RRNAD_HUMAN	Full=Protein RRNAD1	GO:0000179,GO:0016021	Solyc07g066340.2.1	UPF0431 protein C1orf66 homolog
TR40749_c0_g1	21.478	34.878	184.187	188.148	2.61418e-05	0.00103893	Downregulated	XXT1_ARATH	Full=Xyloglucan 6-xylosyltransferase 1	GO:0033843,GO:0035252,GO:0016021,GO:0010411,GO:0006486,GO:0005802,GO:0005768,GO:0000139,GO:0000271,GO:0005794	Solyc03g115740.1.1	Alpha-1 6-xylosyltransferase IPR008630 Galactosyl transferase
TR44261_c0_g1	23.809	34.146	166.243	153.185	0.000119577	0.00328312	Downregulated	DB10_NICSY	Full=ATP-dependent RNA helicase-like protein DB10	GO:0005524,GO:0004386,GO:0003723	Solyc12g035130.1.1	ATP dependent RNA helicase IPR011545 DNA_RNA helicase, DEAD_DEAH box type, N-terminal
TR49540_c0_g1	95.115	34.003	719.793	786.412	1.16686e-07	1.57001e-05	Downregulated	PUMP5_ARATH	Full=Mitochondrial uncoupling protein 5	GO:0015992,GO:0006835,GO:0006839,GO:0005743,GO:0016021,GO:0017077,GO:0005310	Solyc11g010500.1.1	Mitochondrial carrier family IPR001993 Mitochondrial substrate carrier
TR525_c0_g1	0	33.841	0.728	0.415	2.62382e-06	0.000181518	Upregulated	0	0	0	0	0
TR21931_c0_g2	19.195	33.786	5.314	5.116	0.000120759	0.00330568	Upregulated	C7D55_HYOMU	Full=Premnaspirodiene oxygenase	GO:0004497,GO:0016705,GO:0020037,GO:0016021,GO:0005506	Solyc08g005650.2.1	Cytochrome P450
TR10219_c0_g1	8.247	33.203	126.26	118.88	0.000178077	0.00449139	Downregulated	CXE15_ARATH	Full=Probable carboxylesterase 15	GO:0052689	Solyc02g069800.1.1	CXE carboxylesterase IPR013094 Alpha_beta hydrolase fold-3
TR40358_c0_g1	175.429	33.034	5.23	8.226	5.07728e-06	0.000304196	Upregulated	0	0	0	Solyc07g006590.1.1	Unknown Protein
TR61352_c5_g3	11.929	32.851	130.746	138.645	0.000212203	0.00511137	Downregulated	0	0	0	Solyc01g110480.2.1	BZIP transcription factor family protein expressed IPR011616 bZIP transcription factor, bZIP-1
TR21353_c0_g1	20.471	32.708	3.765	3.658	6.03903e-05	0.00198925	Upregulated	AOP1L_ARATH	Full=Probable 2-oxoglutarate-dependent dioxygenase AOP1.2	GO:0046872,GO:0016706	Solyc06g067860.2.1	2-oxoglutarate-dependent dioxygenase (Fragment) IPR005123 Oxoglutarate and iron-dependent oxygenase
TR39780_c0_g1	21.257	32.64	188.42	188.563	1.41316e-05	0.000655974	Downregulated	ASOL_TOBAC	Full=L-ascorbate oxidase homolog	GO:0005615,GO:0005507,GO:0016491	Solyc02g090360.2.1	Laccase-22 IPR001117 Multicopper oxidase, type 1
TR10231_c0_g1	25.11	32.213	5.207	4.458	9.11999e-05	0.00267871	Upregulated	MES10_ARATH	Full=Methylesterase 10	GO:0016787	Solyc03g044740.2.1	Methyl jasmonate esterase IPR000073 Alpha_beta hydrolase fold-1
TR44785_c0_g1	132.032	31.799	6.533	9.667	7.8691e-05	0.00241162	Upregulated	0	0	0	0	0
TR49581_c1_g2	45.262	31.616	2.906	3.087	1.44899e-08	3.06741e-06	Upregulated	UGT1_GARJA	Full=Crocetin glucosyltransferase, chloroplastic	GO:0009507,GO:0016758	Solyc01g066100.1.1	UDP-glucosyltransferase family 1 protein IPR002213 UDP-glucuronosyl_UDP-glucosyltransferase
TR438_c0_g1	0	31.359	1.258	1.582	0.00018062	0.00454469	Upregulated	0	0	0	0	0
TR25193_c0_g1	19.44	31.345	4.632	5.116	9.6893e-05	0.00278438	Upregulated	YLS9_ARATH	Full=Protein YLS9	GO:0009507,GO:0051707,GO:0010150,GO:0051607	Solyc03g081230.1.1	NHL1 (Fragment) IPR010847 Harpin-induced 1
TR43890_c0_g1	20.324	31.331	0.828	1.77	5.79612e-09	1.72009e-06	Upregulated	PGLR4_ARATH	Full=Polygalacturonase At1g48100	GO:0005975,GO:0005618,GO:0071555,GO:0004650,GO:0005576	Solyc01g100980.2.1	Polygalacturonase IPR012334 Pectin lyase fold
TR36439_c0_g3	73.392	31.189	8.305	7.262	7.84055e-05	0.00241162	Upregulated	C76B6_CATRO	Full=Geraniol 8-hydroxylase	GO:0005506,GO:0005789,GO:0016021,GO:0020037,GO:0016099,GO:0016709	Solyc09g098030.2.1	Cytochrome P450
TR48363_c0_g1	11.242	31.094	187.899	192.786	4.95577e-06	0.00029804	Downregulated	PMTT_ARATH	Full=Probable pectin methyltransferase QUA2	GO:0016021,GO:0010289,GO:0009735,GO:0048367,GO:0048364,GO:0008757,GO:0032259,GO:0008168,GO:0007155,GO:0000139,GO:0005768,GO:0005802,GO:0005794,GO:0005774	Solyc04g074290.2.1	Dehydration-responsive protein-like IPR004159 Protein of unknown function DUF248, methyltransferase putative
TR21429_c0_g1	30.952	30.891	349.356	318.16	7.85691e-08	1.12891e-05	Downregulated	B561J_ARATH	Full=Cytochrome b561 and DOMON domain-containing protein At5g47530	GO:0046872,GO:0016021,GO:0055114	Solyc05g041910.2.1	Membrane protein IPR017214 Uncharacterised conserved protein UCP037471
TR45662_c0_g1	19.538	30.728	484.228	497.3	7.10131e-10	3.57928e-07	Downregulated	GDL8_ARATH	Full=GDSL esterase/lipase At1g28590	GO:0005576,GO:0016788,GO:0016042	Solyc12g017460.1.1	GDSL esterase_lipase At1g28590 IPR001087 Lipase, GDSL
TR69690_c1_g2	18.778	30.728	345.852	364.569	1.47159e-08	3.09463e-06	Downregulated	ASO_CUCSA	Full=L-ascorbate oxidase	GO:0005507,GO:0005576,GO:0008447	Solyc04g054690.2.1	Laccase 1a IPR017760 L-ascorbate oxidase, plants
TR69300_c0_g2	37.089	30.708	603.625	571.229	1.38374e-10	1.13788e-07	Downregulated	FLK_ARATH	Full=Flowering locus K homology domain {ECO:0000303|PubMed:14593172}	GO:0005737,GO:0003723,GO:0005634,GO:0006355,GO:0006351,GO:0009911	Solyc09g066120.2.1	Nucleic acid binding protein IPR018111 K Homology, type 1, subgroup
TR57251_c0_g1	46.072	30.66	562.998	591.503	9.10373e-10	4.36698e-07	Downregulated	TCB2_YEAST	Full=Tricalbin-2	GO:0008289,GO:0032541,GO:0016021,GO:0005933,GO:0060304,GO:0005886,GO:0090158	Solyc01g099370.2.1	SRC2 homolog (Fragment) IPR018029 C2 membrane targeting protein
TR53885_c2_g2	17.084	30.613	617.673	612.365	4.254e-11	5.62839e-08	Downregulated	GAE1_ARATH	Full=UDP-glucuronate 4-epimerase 1	GO:0005794,GO:0005768,GO:0050662,GO:0050378,GO:0032580,GO:0016021,GO:0005802,GO:0005975	Solyc12g010540.1.1	NAD dependent epimerase_dehydratase family protein expressed-binding domain
TR69248_c0_g1	10.579	30.558	119.497	104.395	0.000356779	0.00759836	Downregulated	TIF6B_ARATH	Full=Protein TIFY 6B	GO:0006355,GO:0006351,GO:0042802,GO:0031347,GO:0005634,GO:0009867,GO:0006952	Solyc03g118540.2.1	Protein TIFY 6B IPR010399 Tify
TR69316_c0_g1	267.475	30.463	10.95	12.942	3.44574e-05	0.0012964	Upregulated	ISPD_MENPI	Full=(-)-isopiperitenol/(-)-carveol dehydrogenase, mitochondrial	GO:0018458,GO:0005739,GO:0000166,GO:0018459,GO:0031525	Solyc03g113460.1.1	Alcohol dehydrogenase (Fragment) IPR002347 Glucose_ribitol dehydrogenase
TR66913_c1_g1	29.234	30.185	1038.99	1039.85	1.53333e-13	1.21723e-09	Downregulated	XTH15_ARATH	Full=Xyloglucan endotransglucosylase/hydrolase protein 15 {ECO:0000303|PubMed:12514239}	0,GO:0010411,GO:0005618,GO:0048046,GO:0071555,GO:0042546,GO:0033946,GO:0016762	Solyc12g017240.1.1	Xyloglucan endotransglucosylase_hydrolase 7 IPR016455 Xyloglucan endotransglucosylase_hydrolase
TR43899_c0_g1	82.572	30.05	9.693	9.205	0.000385195	0.0080896	Upregulated	AP2_ARATH	Full=Floral homeotic protein APETALA 2	0,GO:0003700,GO:0048481,GO:0003677,GO:0005634,GO:0048316,GO:0006351,GO:0009908,GO:0030154,GO:0010093,GO:0010073	Solyc02g093150.2.1	AP2-like ethylene-responsive transcription factor At1g16060 IPR001471 Pathogenesis-related transcriptional factor and ERF, DNA-binding
TR25086_c1_g1	81.639	29.995	486.107	503.34	8.31563e-07	7.17539e-05	Downregulated	YLS9_ARATH	Full=Protein YLS9	GO:0009507,GO:0051707,GO:0010150,GO:0051607	Solyc10g081980.1.1	Harpin-induced protein-like (Fragment) IPR010847 Harpin-induced 1
TR71076_c0_g1	32.572	29.582	4.678	2.013	3.95751e-06	0.000249835	Upregulated	PER21_ARATH	Full=Peroxidase 21	GO:0005829,GO:0004601,GO:0048511,GO:0020037,GO:0046872,GO:0042744,GO:0050832,GO:0006979	Solyc10g084240.1.1	Peroxidase IPR002016 Haem peroxidase, plant_fungal_bacterial
TR31396_c0_g1	25.11	29.487	2.416	1.402	3.97096e-08	6.85042e-06	Upregulated	0	0	0	Solyc04g015520.2.1	DNA binding protein IPR005516 Remorin, C-terminal region
TR7718_c0_g1	5.081	29.365	2.515	1.81	1.96878e-05	0.000835784	Upregulated	COPIA_DROME	Full=Copia VLP protein	GO:0005524,GO:0015074,GO:0003676,GO:0008270,GO:0004190	Solyc00g075040.1.1	Transposon Ty1-A Gag-Pol polyprotein IPR013103 Reverse transcriptase, RNA-dependent DNA polymerase
TR26040_c0_g1	16.568	29.358	2.055	2.687	6.14715e-06	0.000358159	Upregulated	LK111_ARATH	Full=Putative L-type lectin-domain containing receptor kinase I.11	GO:0009755,GO:0001653,GO:0046777,GO:0007178,GO:0009506,GO:0031625,GO:0005886,GO:0030246,GO:0016021,GO:0005524,GO:0004675	Solyc03g080060.1.1	Receptor-like kinase IPR001220 Legume lectin, beta chain
TR39768_c0_g1	21.6	29.053	128.185	121.074	0.000306716	0.0067401	Downregulated	SCL1_ARATH	Full=Scarecrow-like protein 1	GO:0006355,GO:0006351,GO:0005634,GO:0003700	Solyc04g064550.1.1	GRAS family transcription factor IPR005202 GRAS transcription factor
TR37271_c0_g1	11.684	29.039	6.556	3.541	0.000214901	0.00516184	Upregulated	4ON1_ARATH	Full=Protein At-4/1	GO:0005783,GO:0046907,GO:0009506,GO:0010496,GO:0016032	0	0
TR10350_c0_g1	54.369	29.005	6.994	5.875	3.57315e-05	0.00133484	Upregulated	ADHL7_ARATH	Full=Alcohol dehydrogenase-like 7	GO:0008270,GO:0005737,GO:0004022	Solyc04g082180.2.1	Alcohol dehydrogenase 1 IPR002085 Alcohol dehydrogenase superfamily, zinc-containing
TR18375_c0_g1	48.895	28.971	3.481	2.021	6.93221e-08	1.02384e-05	Upregulated	STR15_ARATH	Full=Rhodanese-like domain-containing protein 15, chloroplastic	0,GO:0009507,GO:0004792	Solyc02g083280.2.1	Thiosulfate sulfurtransferase_rhodanese-like domain-containing protein 1 IPR001763 Rhodanese-like
TR18227_c0_g1	66.544	28.849	159.694	169.613	0.000428224	0.00872215	Downregulated	BAM1_ARATH	Full=Beta-amylase 1, chloroplastic	GO:0016161,GO:0009507,GO:0009414,GO:0005634,GO:0005983,GO:0005829	Solyc09g091030.2.1	Beta-amylase IPR013781 Glycoside hydrolase, subgroup, catalytic core
TR37382_c0_g1	14.114	28.849	404.208	415.388	1.09372e-09	4.95628e-07	Downregulated	ACA2_ARATH	Full=Calcium-transporting ATPase 2, plasma membrane-type	GO:0016021,GO:0016020,GO:0015085,GO:0046872,GO:0005516,GO:0006810,GO:0005388,GO:0005789,GO:0005886,GO:0005783,GO:0005524	Solyc02g064680.2.1	Calcium-transporting ATPase 1 IPR006408 ATPase, P-type, calcium-transporting, PMCA-type
TR25846_c0_g1	109.965	28.727	10.582	11.853	0.000511894	0.00991565	Upregulated	IOJAM_ARATH	Full=Protein Iojap-related, mitochondrial	GO:0005739	Solyc05g014650.2.1	Iojap-like protein IPR004394 Iojap-related protein
TR60321_c0_g1	28.915	28.503	3.819	3.423	2.58627e-05	0.00103263	Upregulated	0	0	0	Solyc09g007550.2.1	Zinc finger family protein IPR007087 Zinc finger, C2H2-type
TR28398_c0_g1	39.838	28.49	227.237	253.836	7.04042e-06	0.000393594	Downregulated	CAST_SOLTU	Full=Calcium-binding protein CAST	GO:0005509	Solyc10g074740.1.1	Calmodulin-like protein IPR011992 EF-Hand type
TR43331_c0_g1	12.396	28.368	1.58	0.94	2.26457e-08	4.49432e-06	Upregulated	0	0	0	Solyc11g066140.1.1	Unknown Protein
TR25070_c0_g1	108.198	28.3	296.774	291.799	0.00026863	0.00605828	Downregulated	NUD17_ARATH	Full=Nudix hydrolase 17, mitochondrial	GO:0046872,GO:0016787,GO:0005739	Solyc03g118470.2.1	Diphosphoinositol polyphosphate phosphohydrolase 1 IPR000086 NUDIX hydrolase domain
TR34949_c0_g1	155.154	28.293	10.751	11.673	0.000190476	0.0046814	Upregulated	CAAT1_ARATH	Full=Cationic amino acid transporter 1	GO:0005887,GO:0005886,GO:0015171,GO:0016020,GO:0015297	Solyc12g096380.1.1	High affinity cationic amino acid transporter 1 IPR015606 Cationic amino acid transporter
TR31426_c1_g1	36.131	28.164	356.128	385.227	2.21996e-08	4.43349e-06	Downregulated	MPK3_ARATH	Full=Mitogen-activated protein kinase 3	GO:0004672,GO:0004707,GO:0000169,GO:0006979,GO:0005737,GO:0005524,GO:0005634,GO:0006970,GO:0009555,GO:0009626,GO:0080136,GO:0009409,GO:0009611,GO:0009617,GO:0010200,GO:0009738,GO:0010120,GO:0010183,GO:0048481,GO:0010224,GO:0010229	Solyc06g005170.2.1	Mitogen-activated protein kinase 3 IPR002290 Serine_threonine protein kinase
TR48385_c1_g2	81.688	28.042	5.882	5.249	3.32442e-06	0.000218558	Upregulated	TBL41_ARATH	Full=Protein trichome birefringence-like 41	GO:0016021	Solyc07g062220.2.1	Os06g0207500 protein (Fragment) IPR004253 Protein of unknown function DUF231, plant
TR6416_c1_g1	32.597	27.974	221.624	223.283	2.3975e-06	0.000169933	Downregulated	NAC14_ARATH	Full=NAC domain-containing protein 14 {ECO:0000303|PubMed:15029955}	GO:0003677,GO:0070417,GO:0005634,GO:0003700,GO:0016021,GO:0010200,GO:0005886,GO:0006351,GO:0009814	Solyc03g080090.2.1	NAC domain protein IPR003441 protein
TR10167_c0_g1	21.625	27.642	3.044	4.943	9.89809e-06	0.000506942	Upregulated	PPCK1_ARATH	Full=Phosphoenolpyruvate carboxylase kinase 1	GO:0005524,GO:0009738,GO:0009416,GO:0005516,GO:0005886,GO:0004683,GO:0004674,GO:0005737,GO:0018105,GO:0046898,GO:0009931,GO:0035556,GO:0046777	Solyc06g053620.2.1	Calcium-dependent protein kinase 2 IPR002290 Serine_threonine protein kinase
TR15177_c1_g1	27.835	27.405	370.26	372.536	9.81468e-09	2.3508e-06	Downregulated	LOR15_ARATH	Full=Protein LURP-one-related 15	GO:0009507	Solyc10g085420.1.1	Os03g0816700 protein (Fragment) IPR007612 Protein of unknown function DUF567
TR36417_c0_g1	9.622	27.351	144.081	142.249	7.20061e-05	0.00227737	Downregulated	FERON_ARATH	Full=Receptor-like protein kinase FERONIA	GO:0004675,GO:0009723,GO:0005524,GO:0009742,GO:0009738,GO:0007178,GO:0009506,GO:0007338,GO:0009741,GO:0001653,GO:0009755,GO:0005886,GO:0004672,GO:0048364,GO:0050832,GO:0046777,GO:0043680,GO:0010483,GO:0009873,GO:0016020,GO:0030308,GO:0031625,GO:0009788,GO:0005622,GO:0016021,GO:0009791	Solyc09g015830.1.1	Pto-like, Serine_threonine kinase protein, resistance protein
TR10953_c0_g1	28.031	27.344	472.956	463.598	1.02863e-09	4.73376e-07	Downregulated	EXLA2_ARATH	Full=Expansin-like A2	GO:0019953,GO:0005576	Solyc01g112000.2.1	Expansin-like protein IPR007112 Expansin 45, endoglucanase-like IPR007117 Pollen allergen_expansin, C-terminal
TR43352_c0_g2	16.642	27.011	4.248	3.118	7.24147e-05	0.00227804	Upregulated	0	0	0	Solyc00g230060.1.1	RNase H family protein IPR012337 Polynucleotidyl transferase, ribonuclease H fold
TR54755_c0_g2	294.132	26.489	9.409	8.241	2.1335e-05	0.000890237	Upregulated	SODC2_MESCR	Full=Superoxide dismutase [Cu-Zn] 2	GO:0005737,GO:0004784,GO:0046872	Solyc03g062890.2.1	Superoxide dismutase IPR001424 Superoxide dismutase, copper_zinc binding
TR56347_c1_g1	104.074	26.442	10.03	10.074	0.000386497	0.00811158	Upregulated	0	0	0	Solyc09g018950.2.1	RPA-interacting protein A
TR10351_c0_g1	81.369	26.286	6.595	8.461	0.000125047	0.00339379	Upregulated	MCCB_ARATH	Full=Methylcrotonoyl-CoA carboxylase beta chain, mitochondrial	GO:0005524,GO:0005739,GO:0050897,GO:0006552,GO:0004485,GO:0008270,GO:0005759	Solyc01g108030.2.1	Methylcrotonoyl-CoA carboxylase beta subunit IPR000022 Carboxyl transferase
TR31172_c0_g1	12.641	26.11	175.138	175.473	2.944e-06	0.000198059	Downregulated	MYB44_ARATH	Full=Transcription factor MYB44	GO:0009723,GO:0003677,GO:2000022,GO:2000031,GO:0009751,GO:0010200,GO:0009753,GO:0009651,GO:0050832,GO:0009414,GO:0006351,GO:0046686,GO:0009739,GO:0042742,GO:0005634,GO:0003700,GO:0009733,GO:0009737,GO:0009738	Solyc04g078420.1.1	MYB transcription factor IPR015495 Myb transcription factor
TR48430_c0_g1	19.661	26.082	165.584	172.935	7.03478e-06	0.000393594	Downregulated	GT3_ARATH	Full=Putative glycosyltransferase 3	GO:0005794,GO:0005768,GO:0010411,GO:0016021,GO:0005802,GO:0000139,GO:0033843,GO:0048767	Solyc03g115740.1.1	Alpha-1 6-xylosyltransferase IPR008630 Galactosyl transferase
TR7732_c0_g1	84.462	25.933	7.714	7.834	0.000416157	0.00853659	Upregulated	0	0	0	0	0
TR44388_c1_g1	8.026	25.852	323.522	364.138	5.93645e-09	1.72941e-06	Downregulated	HSP72_SOLLC	Full=Heat shock cognate 70 kDa protein 2	GO:0005524	Solyc10g086410.2.1	Heat shock protein 70-3 IPR013126 Heat shock protein 70
TR50636_c1_g1	29.013	25.77	96.737	113.514	0.000349851	0.00746584	Downregulated	CPRF1_PETCR	Full=Common plant regulatory factor 1	GO:0005634,GO:0003700,GO:0006351,GO:0043565	Solyc01g095460.2.1	G-box binding factor 3 IPR012900 G-box binding, MFMR
TR56142_c0_g1	24.227	25.75	109.413	119.601	0.000236252	0.00552115	Downregulated	Y1322_ARATH	Full=C2 domain-containing protein At1g63220	0	Solyc01g107740.2.1	Protein unc-13 homolog C IPR018029 C2 membrane targeting protein
TR44164_c0_g1	13.328	25.513	178.52	170.381	4.07191e-06	0.000255532	Downregulated	SUSY_SOLLC	Full=Sucrose synthase	GO:0016157,GO:0005985,GO:0009058	Solyc12g009300.1.1	Sucrose synthase IPR012820 Sucrose synthase, plants and cyanobacteria IPR000368 Sucrose synthase
TR42726_c0_g1	50.982	25.452	247.052	250.906	1.50303e-05	0.000685736	Downregulated	SAP5_ARATH	Full=Zinc finger A20 and AN1 domain-containing stress-associated protein 5	GO:0005634,GO:0004842,GO:0003677,GO:0006970,GO:0009414,GO:0008270,GO:0016567,GO:0051865	Solyc01g086960.2.1	Zinc finger A20 and AN1 domain-containing stress-associated protein 6 IPR000058 Zinc finger, AN1-type
TR41333_c0_g2	18.581	25.445	143.184	139.687	6.72567e-05	0.00215289	Downregulated	WRK70_ARATH	Full=Probable WRKY transcription factor 70	GO:0009753,GO:1900056,GO:0050832,GO:0009751,GO:0045892,GO:0042742,GO:0031347,GO:0009862,GO:0009864,GO:0043565,GO:0006351,GO:0010200,GO:0005634,GO:0003700	Solyc09g015770.2.1	WRKY transcription factor 6 IPR003657 DNA-binding WRKY
TR16154_c0_g1	186.376	25.391	10.138	9.025	8.354e-05	0.00250494	Upregulated	CSPLC_VITVI	Full=CASP-like protein 2B1	GO:0016021,GO:0005886	Solyc05g054190.2.1	UPF0497 membrane protein 12 IPR006459 Uncharacterised protein family UPF0497, trans-membrane plant subgroup
TR7318_c0_g1	27.958	25.377	178.773	174.259	1.01214e-05	0.000515882	Downregulated	SDS22_CAEEL	Full=Protein phosphatase 1 regulatory subunit SDS22 homolog	GO:0005634	Solyc04g074270.2.1	Phosphatase 1 regulatory subunit 7 IPR001611 Leucine-rich repeat
TR33247_c0_g1	52.184	24.977	471.046	472.842	4.67506e-08	7.73187e-06	Downregulated	TI10A_ARATH	Full=Protein TIFY 10A	GO:0005634,GO:1900067,GO:0006351,GO:0006355,GO:0009753,GO:0009555,GO:0042742,GO:0009908,GO:0009867	Solyc07g042170.2.1	Jasmonate ZIM-domain protein 3 IPR010399 Tify
TR51565_c0_g1	58.689	24.848	5.851	5.727	2.54858e-05	0.0010257	Upregulated	MCM2_ORYSJ	Full=DNA replication licensing factor MCM2	GO:0006268,GO:0006084,GO:0008283,GO:0003677,GO:0005634,GO:0010082,GO:0009790,GO:0003678,GO:0009165,GO:0009909,GO:0042555,GO:0005524,GO:0042127,GO:0051726,GO:0005829,GO:0051567,GO:0000911,GO:0006306,GO:0046872,GO:0006275,GO:0006270	Solyc11g040120.1.1	DNA replication licensing factor IPR008045 MCM protein 2
TR52740_c0_g1	146.366	24.699	11.035	5.774	0.00021138	0.00510818	Upregulated	PP19_ARATH	Full=Serine/threonine-protein phosphatase PP1 isozyme 9	GO:0016311,GO:0046872,GO:0004722	Solyc01g099860.2.1	Serine_threonine-protein phosphatase-tetraphosphatase
TR34057_c0_g1	202.453	24.597	10.337	11.015	0.00016001	0.00412739	Upregulated	0	0	0	Solyc07g042450.2.1	Unknown Protein
TR39009_c0_g1	37.85	24.258	2.477	0.862	3.84626e-07	4.0044e-05	Upregulated	DEF19_ARATH	Full=Defensin-like protein 19	GO:0031640,GO:0006952,GO:0005576,GO:0050832	Solyc07g009260.2.1	Defensin-like protein IPR008176 Gamma thionin
TR37265_c0_g1	24.006	24.19	325.999	319.578	8.49827e-09	2.17405e-06	Downregulated	0	0	0	Solyc01g111440.2.1	Senescence-associated protein 12 IPR009686 Senescence-associated
TR42799_c0_g2	54.173	24.028	4.593	1.441	2.63722e-06	0.000181653	Upregulated	0	0	0	Solyc08g006100.2.1	DUF599 family protein IPR006747 Protein of unknown function DUF599
TR42616_c0_g1	12.837	24.014	143.959	126.746	1.94389e-05	0.00082854	Downregulated	YODA_ARATH	Full=Mitogen-activated protein kinase kinase kinase YODA	GO:0007346,GO:0010229,GO:0005737,GO:0032147,GO:0010098,GO:0010103,GO:0004709,GO:0005524,GO:0051403,GO:0042981,GO:0040008,GO:0000186	Solyc11g006000.1.1	Protein serine_threonine kinase IPR015748 Mitogen activated protein kinase kinase kinase 3
TR10344_c0_g1	9.622	23.668	126.674	120.353	2.58651e-05	0.00103263	Downregulated	BH144_ARATH	Full=Transcription factor bHLH144	GO:0006355,GO:0006351,GO:0005634,GO:0003700,GO:0003677	Solyc02g070880.1.1	BHLH1 transcription factor IPR001092 Basic helix-loop-helix dimerisation region bHLH
TR51710_c1_g2	25.552	23.6	4.264	5.445	0.000216995	0.0051925	Upregulated	DIR11_ARATH	Full=Dirigent protein 11	GO:0048046	Solyc01g059900.2.1	Dirigent-like protein IPR004265 Plant disease resistance response protein
TR56356_c0_g1	16.372	23.566	208.158	223.064	3.69201e-07	3.93588e-05	Downregulated	CAB25_ARATH	Full=Calmodulin-binding protein 25 {ECO:0000303|PubMed:15086802}	GO:0005634,GO:0010337,GO:0009651,GO:0009414,GO:0005516	Solyc10g077130.1.1	Atcambp25-binding protein OF IPR008889 VQ
TR63521_c0_g1	21.797	23.546	1.127	0.642	6.3469e-09	1.81567e-06	Upregulated	WTR7_ARATH	Full=WAT1-related protein At1g43650	GO:0022857,GO:0016021	Solyc00g052940.2.1	Nodulin-like protein IPR000620 Protein of unknown function DUF6, transmembrane
TR16833_c0_g1	15.218	23.431	2.745	1.011	1.22281e-06	9.86409e-05	Upregulated	PIP12_ORYSJ	Full=Probable aquaporin PIP1-2	GO:0006833,GO:0009992,GO:0005887,GO:0009506,GO:0005773,GO:0034220,GO:0015793,GO:0015254,GO:0015250	Solyc03g096290.2.1	Aquaporin-like protein IPR012269 Aquaporin
TR34947_c0_g1	22.999	23.282	95.418	109.158	0.000401422	0.00832576	Downregulated	USPAL_ARATH	Full=Universal stress protein A-like protein	GO:0016208,GO:0006950,GO:0005886	Solyc01g109710.2.1	Universal stress protein IPR006016 UspA
TR48610_c0_g1	18.753	22.814	99.321	108.97	0.000218728	0.00522217	Downregulated	0	0	0	Solyc03g112700.1.1	Calmodulin-binding protein IPR012442 Protein of unknown function DUF1645
TR45869_c0_g1	11.365	22.746	189.394	189.731	2.64866e-07	3.01454e-05	Downregulated	IPCS1_ARATH	Full=Phosphatidylinositol:ceramide inositolphosphotransferase 1	0,GO:0030148,GO:0016021,GO:0045140	Solyc10g086690.1.1	Phosphatidylcholine:ceramide cholinephosphotransferase 2
TR53202_c0_g1	164.972	22.698	8.52	10.098	0.000135677	0.00361435	Upregulated	RAR1_ARATH	Full=Cysteine and histidine-rich domain-containing protein RAR1	GO:0002679,GO:0009817,GO:0008270,GO:0009816,GO:0009626,GO:0042742,GO:0051879,GO:0050821	Solyc11g072290.1.1	Cysteine and histidine-rich domain-containing protein 1 IPR007051 CHORD
TR52598_c0_g1	11.586	22.698	176.097	174.141	6.35549e-07	5.83272e-05	Downregulated	CDPKS_ARATH	Full=Calcium-dependent protein kinase 28	GO:0005886,GO:0005737,GO:0005524,GO:0005516,GO:0005509,GO:0004672,GO:0004683,GO:0009738,GO:0018105,GO:0009931,GO:0035556,GO:0046777	Solyc03g033540.2.1	Calcium-dependent protein kinase IPR002290 Serine_threonine protein kinase
TR19604_c0_g1	0	22.664	87.527	79.679	0.000415906	0.00853659	Downregulated	GAE5_ARATH	Full=UDP-glucuronate 4-epimerase 5	GO:0005794,GO:0050378,GO:0032580,GO:0050662,GO:0005802,GO:0005768,GO:0005975,GO:0016021	Solyc08g079440.1.1	UDP-D-glucuronate 4-epimerase 2-binding domain
TR55728_c0_g1	24.03	22.312	1.135	2.248	7.24361e-08	1.06488e-05	Upregulated	0	0	0	0	0
TR36440_c3_g1	40.795	22.163	2.883	0	7.23247e-07	6.50595e-05	Upregulated	0	0	0	0	0
TR39925_c0_g1	50.834	22.074	185.353	168.438	0.000223859	0.00530875	Downregulated	0	0	0	Solyc03g007870.2.1	Heavy metal-associated domain containing protein expressed IPR006121 Heavy metal transport_detoxification protein
TR60487_c1_g1	39.298	22.074	5.468	6.565	0.00030322	0.00667714	Upregulated	PER64_ARATH	Full=Peroxidase 64	GO:0006979,GO:0009505,GO:0005576,GO:0004601,GO:0042744,GO:0046872,GO:0020037	Solyc02g083490.2.1	Peroxidase IPR002016 Haem peroxidase, plant_fungal_bacterial
TR51544_c0_g1	8.051	22.013	78.087	71.555	0.000452077	0.00907412	Downregulated	CSCLD_ARATH	Full=CSC1-like protein ERD4	GO:0009506,GO:0006811,GO:0005886,GO:0016021,GO:0005774,GO:0005773,GO:0016020,GO:0009507,GO:0009941	Solyc08g023440.2.1	Early-responsive to dehydration 4 IPR003864 Protein of unknown function DUF221
TR30518_c1_g1	16.421	21.959	3.305	3.282	4.47666e-05	0.00157074	Upregulated	ZFP6_ARATH	Full=Zinc finger protein 6	GO:0003700,GO:0006355,GO:0046872,GO:0022626,GO:0006351,GO:0009740,GO:0007275,GO:0044212,GO:0009736,GO:0010026	Solyc05g009170.1.1	Zinc finger protein 6 IPR007087 Zinc finger, C2H2-type
TR37736_c0_g1	0	21.864	87.765	83.91	0.000315086	0.00688593	Downregulated	NU4LM_ARATH	Full=NADH-ubiquinone oxidoreductase chain 4L	GO:0016021,GO:0070469,GO:0042773,GO:0031966,GO:0008137	Solyc01g056670.1.1	NADH-quinone oxidoreductase subunit K IPR001133 NADH:ubiquinone_quinone oxidoreductase, chain 4L
TR11010_c0_g1	4.32	21.776	2.278	1.778	8.41927e-05	0.00251738	Upregulated	MT878_ARATH	Full=Probable S-adenosylmethionine-dependent methyltransferase At5g38780	GO:0008168	Solyc01g005230.2.1	S-adenosyl-L-methionine salicylic acid carboxyl methyltransferase IPR005299 SAM dependent carboxyl methyltransferase
TR17624_c0_g1	20.201	21.552	130.792	172.762	1.63033e-05	0.000731207	Downregulated	Y5241_ARATH	Full=Probable receptor-like protein kinase At5g24010	GO:0005886,GO:0016021,GO:0009506,GO:0004674,GO:0005524	Solyc01g094920.2.1	Receptor-like kinase
TR29231_c0_g1	82.474	21.423	5.076	5.75	1.69022e-05	0.000753809	Upregulated	YRBE_BACSU	Full=Uncharacterized oxidoreductase YrbE	GO:0016491	Solyc08g078460.2.1	Inositol 2-dehydrogenase like protein-binding domain
TR31571_c0_g1	9.426	21.172	0.399	0	4.414e-08	7.33833e-06	Upregulated	0	0	0	0	0
TR6673_c0_g1	46.563	21.091	5.046	4.959	8.86899e-05	0.00262466	Upregulated	TM45B_BOVIN	Full=Transmembrane protein 45B	GO:0016021	Solyc10g050430.1.1	Plant viral-response family protein IPR006904 Protein of unknown function DUF716
TR10989_c0_g1	99.999	21.084	9.286	6.408	0.000394859	0.00822726	Upregulated	0	0	0	Solyc01g097020.2.1	Unknown Protein
TR7283_c1_g1	81.246	21.037	3.934	1.387	1.90565e-06	0.000141054	Upregulated	0	0	0	Solyc01g065800.1.1	Unknown Protein
TR8986_c1_g1	12.347	21.037	133.974	125.813	7.18244e-06	0.0003998	Downregulated	SLPI_SCHPO	Full=Uncharacterized protein slp1 {ECO:0000250|UniProtKB:Q12232}	GO:0034975,GO:0005789,GO:0016021	Solyc08g082540.2.1	Sad1_UNC domain protein IPR012919 Sad1_UNC-like, C-terminal
TR34227_c0_g1	24.84	20.962	4.624	3.674	0.000113358	0.00313551	Upregulated	MYB59_ARATH	Full=Transcription factor MYB59	GO:0046686,GO:0003700,GO:0010200,GO:0003677,GO:0009753,GO:0009751,GO:0005634,GO:0009739,GO:0006351,GO:0009723	Solyc09g090790.2.1	MYB transcription factor IPR015495 Myb transcription factor
TR54474_c0_g2	32.229	20.881	3.489	1.904	2.97284e-05	0.00115544	Upregulated	AOP1L_ARATH	Full=Probable 2-oxoglutarate-dependent dioxygenase AOP1.2	GO:0046872,GO:0016706	Solyc12g100170.1.1	2-oxoglutarate-dependent dioxygenase (Fragment) IPR005123 Oxoglutarate and iron-dependent oxygenase
TR27920_c0_g1	92.881	20.854	1024.43	947.196	2.79807e-08	5.13584e-06	Downregulated	HARB1_HUMAN	Full=Putative nuclease HARBI1	GO:0046872,GO:0005813,GO:0004518,GO:0005737,GO:0005634	Solyc07g040960.1.1	Os07g0175100 protein (Fragment)
TR63060_c0_g1	19.759	20.82	104.16	104.419	0.000195752	0.00478148	Downregulated	ANXD4_ARATH	Full=Annexin D4	GO:0009409,GO:0006970,GO:0009408,GO:0009414,GO:0009506,GO:0009651,GO:0009737,GO:0005544,GO:0005509	Solyc01g097520.2.1	Annexin 11 IPR009118 Annexin, type plant
TR68164_c0_g1	310.209	20.786	9.501	9.322	6.47631e-05	0.00208408	Upregulated	ODBA2_ARATH	Full=2-oxoisovalerate dehydrogenase subunit alpha 2, mitochondrial	GO:0046872,GO:0003863,GO:0005759,GO:0005739	Solyc05g056480.2.1	Pyruvate dehydrogenase E1 component alpha subunit IPR001017 Dehydrogenase, E1 component
TR67253_c0_g1	70.888	20.732	275.625	278.293	7.14145e-05	0.00226317	Downregulated	DCAM_IPONI	Full=S-adenosylmethionine decarboxylase alpha chain	GO:0008295,GO:0006557,GO:0004014,GO:0006597	Solyc02g089610.1.1	S-adenosylmethionine decarboxylase proenzyme IPR001985 S-adenosylmethionine decarboxylase
TR45928_c0_g1	10.997	20.711	3.965	4.951	0.00036334	0.00770708	Upregulated	0	0	0	Solyc12g097060.1.1	Genomic DNA chromosome 3 BAC clone F14O13
TR22107_c0_g1	54.418	20.63	593.986	654.112	9.8462e-09	2.3508e-06	Downregulated	BCS1B_DICDI	Full=Probable mitochondrial chaperone BCS1-B	GO:0071806,GO:0005739,GO:0005524,GO:0005743,GO:0008320,GO:0034551,GO:0016021,GO:0051131	Solyc02g087540.1.1	Cell division AAA ATPase family protein IPR003959 ATPase, AAA-type, core
TR24484_c1_g1	11.463	20.63	329.212	260.722	5.14666e-09	1.57141e-06	Downregulated	U483_ANOGA	Full=UPF0483 protein AGAP003155	0	Solyc04g074950.2.1	Ovarian cancer-associated gene 2 protein homolog IPR005645 Protein of unknown function DUF341
TR577_c2_g1	0	20.467	195.245	213.828	6.02205e-07	5.62424e-05	Downregulated	SUD1_ARATH	Full=Probable E3 ubiquitin ligase SUD1	GO:0004842,GO:0009414,GO:0008299,GO:0008270,GO:0010345,GO:0010143,GO:0010025,GO:1900490,GO:0016021,GO:0042335,GO:0016874	Solyc03g116030.2.1	E3 ubiquitin-protein ligase MARCH3 IPR011016 Zinc finger, RING-CH-type
TR23830_c0_g1	10.997	20.406	486.751	460.456	1.15662e-11	2.16043e-08	Downregulated	LOX31_SOLTU	Full=Linoleate 13S-lipoxygenase 3-1, chloroplastic	GO:0046872,GO:0031408,GO:0016165,GO:0009570,GO:0009534	Solyc03g122340.2.1	Lipoxygenase IPR001246 Lipoxygenase, plant
TR43221_c0_g1	4.786	20.393	86.438	83.494	5.29569e-05	0.00179251	Downregulated	DOF17_ARATH	Full=Dof zinc finger protein DOF1.7	0,GO:0005829,GO:0005634,GO:0008536,GO:0005085,GO:0007264,GO:0015031	Solyc01g010810.2.1	RAN guanine nucleotide release factor IPR016123 Mog1_PsbP, alpha_beta_alpha sandwich
TR65098_c0_g1	18.311	20.352	104.029	121.873	4.63715e-05	0.00160826	Downregulated	SCL13_ARATH	Full=Scarecrow-like protein 13	GO:0005737,GO:0005634,GO:0006355,GO:0006351	Solyc11g012510.1.1	GRAS family transcription factor IPR005202 GRAS transcription factor
TR59749_c0_g1	55.302	20.318	550.782	551.213	1.17875e-08	2.71231e-06	Downregulated	COBL7_ARATH	Full=COBRA-like protein 7	GO:0009506,GO:0005794,GO:0046658,GO:0010215,GO:0005768,GO:0005802,GO:0016049,GO:0031225	Solyc01g065530.2.1	COBRA-like protein IPR006918 Glycosyl-phosphatidyl inositol-anchored, plant
TR57434_c0_g1	15.857	20.237	124.128	111.062	3.7496e-05	0.00137966	Downregulated	IPCS1_ARATH	Full=Phosphatidylinositol:ceramide inositolphosphotransferase 1	GO:0030148,GO:0016021,GO:0045140	Solyc09g011740.2.1	Phosphatidylcholine:ceramide cholinephosphotransferase 1
TR34064_c0_g1	53.142	20.121	425.112	407.475	1.34141e-07	1.75289e-05	Downregulated	ZAT10_ARATH	Full=Zinc finger protein ZAT10	GO:0043565,GO:0045892,GO:0046872,GO:0035264,GO:0003700,GO:0015979,GO:0010200,GO:0010117,GO:0009737,GO:0009409,GO:0006351,GO:0006979,GO:0005634,GO:0009611,GO:0009651,GO:0009644,GO:0009414	Solyc04g077980.1.1	Zinc-finger protein IPR007087 Zinc finger, C2H2-type
TR51738_c0_g1	8.468	20.06	3.704	1.504	0.000288299	0.00641531	Upregulated	PGLR4_ARATH	Full=Polygalacturonase At1g48100	GO:0005975,GO:0005618,GO:0071555,GO:0004650,GO:0005576	Solyc04g008230.2.1	Polygalacturonase IPR012334 Pectin lyase fold
TR10231_c0_g2	8.174	20.033	3.006	0.729	0.000125939	0.00340346	Upregulated	0	0	0	Solyc03g044740.2.1	Methyl jasmonate esterase IPR000073 Alpha_beta hydrolase fold-1
TR6461_c0_g1	7.29	19.877	123.791	119.006	1.03339e-05	0.000522521	Downregulated	Y1839_ARATH	Full=Probable serine/threonine-protein kinase At1g18390	GO:0007178,GO:0001653,GO:0009506,GO:0005886,GO:0004675,GO:0009755,GO:0005524,GO:0030247,GO:0071215,GO:0042631,GO:0031625,GO:0046777,GO:0048573	Solyc03g119240.2.1	Receptor-like kinase IPR002290 Serine_threonine protein kinase
TR52749_c0_g1	21.33	19.531	139.273	165.955	1.06474e-05	0.000532437	Downregulated	0	0	0	Solyc01g073820.2.1	CHP-rich zinc finger protein-like IPR011424 C1-like
TR32168_c1_g1	10.849	19.504	77.911	73.553	0.000357872	0.00761654	Downregulated	UN45A_RAT	Full=Protein unc-45 homolog A	GO:0005794,GO:0061077,GO:0048471,GO:0005654,GO:0030154,GO:0007517	Solyc06g065910.2.1	At1g62390-like protein (Fragment) IPR011990 Tetratricopeptide-like helical
TR2225_c1_g3	0	19.423	0.69	1.018	0.000239038	0.0055689	Upregulated	0	0	0	Solyc09g008760.1.1	Unknown Protein IPR008889 VQ
TR40714_c0_g1	19.318	19.369	2.83	2.703	3.75845e-05	0.00138132	Upregulated	RHA4A_ARATH	Full=RING-H2 zinc finger protein RHA4a	GO:0008270	Solyc08g082680.2.1	Ring H2 finger protein IPR001841 Zinc finger, RING-type
TR71641_c0_g1	12.739	19.362	127.426	132.919	4.11e-06	0.000256109	Downregulated	PAO4_ARATH	Full=Probable polyamine oxidase 4	GO:0052894,GO:0046592,GO:0006598,GO:0005777,GO:0052895,GO:0052901	Solyc02g081390.2.1	Amine oxidase family protein IPR002937 Amine oxidase
TR30510_c0_g2	110.358	19.124	6.15	8.163	0.000300299	0.00662661	Upregulated	0	0	0	Solyc06g071370.1.1	NHL repeat-containing protein-like
TR21414_c2_g1	7.904	19.104	2.715	1.637	4.86958e-05	0.0016771	Upregulated	CDA7L_HUMAN	Full=Cell division cycle-associated 7-like protein	GO:0008284,GO:0005730,GO:0005634,GO:0006355,GO:0005737,GO:0006351	Solyc02g090200.2.1	Cell division cycle associated 7 IPR018866 Cell division cycle-associated protein
TR6420_c0_g1	17.354	18.792	143.675	147.388	3.76402e-06	0.000240005	Downregulated	KATAM_ARATH	Full=Xyloglucan galactosyltransferase KATAMARI1	GO:0005794,GO:0006486,GO:0005802,GO:0009863,GO:0032580,GO:0009826,GO:0005768,GO:0009969,GO:0010256,GO:0016757,GO:0030173,GO:0042353	Solyc09g064470.2.1	Galactosyltransferase-like protein (Fragment) IPR004263 Exostosin-like
TR42683_c0_g1	17.157	18.758	280.556	262.665	2.37212e-08	4.64965e-06	Downregulated	CIGR1_ORYSJ	Full=Chitin-inducible gibberellin-responsive protein 1	GO:0006351,GO:0006355,GO:0005634	Solyc07g063940.1.1	GRAS family transcription factor IPR005202 GRAS transcription factor
TR51929_c0_g1	0	18.738	125.133	113.733	1.47209e-05	0.000674102	Downregulated	PMTT_ARATH	Full=Probable pectin methyltransferase QUA2	GO:0016021,GO:0010289,GO:0009735,GO:0048367,GO:0048364,GO:0008757,GO:0032259,GO:0008168,GO:0007155,GO:0000139,GO:0005768,GO:0005802,GO:0005794,GO:0005774	Solyc04g074290.2.1	Dehydration-responsive protein-like IPR004159 Protein of unknown function DUF248, methyltransferase putative
TR59742_c0_g1	16.544	18.724	208.619	211.407	3.54919e-08	6.29614e-06	Downregulated	CSLC4_ARATH	Full=Xyloglucan glycosyltransferase 4	GO:0005886,GO:0016021,GO:0071555,GO:0005802,GO:0005794,GO:0016757,GO:0005768,GO:0000139	Solyc02g089640.2.1	Cellulose synthase-like C1-2 glycosyltransferase family 2 protein
TR46480_c0_g1	166.224	18.623	5.069	4.152	6.83076e-06	0.000387329	Upregulated	21KD_DAUCA	Full=21 kDa protein	GO:0004857,GO:0030599	Solyc12g009270.1.1	Pectinesterase IPR006501 Pectinesterase inhibitor
TR31202_c0_g1	15.439	18.521	79.237	77.399	0.000511274	0.00991148	Downregulated	0	0	0	Solyc05g009360.2.1	Unknown Protein
TR19740_c0_g1	21.33	18.419	3.719	2.523	0.000189492	0.00466807	Upregulated	GDAP2_XENTR	Full=Ganglioside-induced differentiation-associated protein 2	0	Solyc04g082050.2.1	Cellular retinaldehyde-binding_triple function C-terminal IPR001251 Cellular retinaldehyde-binding_triple function, C-terminal
TR23826_c1_g1	48.576	18.365	194.102	144.215	0.000209511	0.00506687	Downregulated	0	0	0	0	0
TR56131_c0_g1	45.066	18.182	182.975	183.604	3.15238e-05	0.00120894	Downregulated	RING1_GOSHI	Full=E3 ubiquitin-protein ligase RING1	GO:0016567,GO:0016874,GO:0008270	Solyc04g011610.1.1	RING finger protein 13 IPR010543 Protein of unknown function DUF1117
TR68814_c0_g1	31.198	17.931	297.533	291.18	3.92222e-08	6.8432e-06	Downregulated	CAF1I_ARATH	Full=Probable CCR4-associated factor 1 homolog 9	GO:0042742,GO:0006351,GO:0030014,GO:0005737,GO:0009611,GO:0006355,GO:0008408,GO:0005634,GO:0004535,GO:0003723,GO:0002213,GO:0000289,GO:0000175,GO:0090305,GO:0046872,GO:0090503	Solyc06g074030.1.1	CCR4-NOT transcription complex subunit 7 IPR006941 Ribonuclease CAF1
TR47748_c0_g3	265.732	17.897	5.859	5.774	2.185e-05	0.000904596	Upregulated	Y5639_ARATH	Full=Probable leucine-rich repeat receptor-like protein kinase At5g63930	GO:0005524,GO:0004674,GO:0005886,GO:0016021	Solyc09g091260.2.1	Receptor like kinase, RLK
TR53133_c0_g1	7.928	17.822	80.349	77.854	0.000185892	0.00462143	Downregulated	P2C78_ORYSJ	Full=Probable protein phosphatase 2C 78	GO:0006470,GO:0046872,GO:0004722	Solyc02g092750.2.1	Phosphatase 2C family protein IPR015655 Protein phosphatase 2C
TR5859_c0_g1	69.735	17.775	6.994	5.703	0.000226091	0.00533074	Upregulated	COR2_PAPSO	Full=Non-functional NADPH-dependent codeinone reductase 2	GO:0016491,GO:0005829	Solyc04g008440.1.1	Reductase 2 IPR020471 Aldo_keto reductase subgroup
TR13492_c0_g1	19.072	17.721	123.775	104.215	0.000110421	0.00308111	Downregulated	PATL2_ARATH	Full=Patellin-2	GO:0007049,GO:0005886,GO:0005794,GO:0005215,GO:0008289,GO:0051301,GO:0016021,GO:0009507,GO:0002020	Solyc11g051160.1.1	Phosphatidylinositol transfer protein SFH5 IPR001251 Cellular retinaldehyde-binding_triple function, C-terminal
TR25020_c0_g1	16.2	17.721	80.94	83.808	0.00022575	0.00532972	Downregulated	DNJ10_ARATH	Full=Chaperone protein dnaJ 10	0	Solyc01g109890.2.1	Chaperone protein dnaJ 10 IPR003095 Heat shock protein DnaJ
TR10918_c1_g2	18.09	17.673	224.047	219.711	1.33703e-08	2.928e-06	Downregulated	0	0	0	Solyc05g006780.2.1	NPH3 domain containing protein-like IPR007679 Protein of unknown function DUF569
TR56980_c0_g1	8.517	17.598	96.606	92.817	7.88409e-05	0.00241186	Downregulated	YLS9_ARATH	Full=Protein YLS9	GO:0009507,GO:0051707,GO:0010150,GO:0051607	Solyc02g036480.1.1	Harpin-induced protein-like (Fragment) IPR010847 Harpin-induced 1
TR45942_c1_g1	0	17.517	1.526	0.384	0.000503457	0.00978983	Upregulated	0	0	0	0	0
TR60764_c0_g3	0	17.47	0.299	0	7.20179e-06	0.0003998	Upregulated	0	0	0	0	0
TR51120_c0_g1	3.068	17.463	103.332	107.028	6.92036e-06	0.000390318	Downregulated	MYC2_ARATH	Full=Transcription factor MYC2	GO:0045893,GO:0009737,GO:0009611,GO:0043619,GO:2000068,GO:0009269,GO:0043565,GO:0009963,GO:0009738,GO:0006351,GO:0009753,GO:0003677,GO:0003700,GO:0051090,GO:0010200,GO:0005634	Solyc08g076930.1.1	Transcription factor IPR011598 Helix-loop-helix DNA-binding
TR10864_c0_g1	8.076	17.402	99.022	88.923	2.1733e-05	0.000903286	Downregulated	APK2B_ARATH	Full=Protein kinase 2B, chloroplastic	GO:0005886,GO:0001653,GO:0007178,GO:0005524,GO:0009506,GO:0005737,GO:0005634,GO:0004675,GO:0009536,GO:0009755,GO:0031625,GO:0046777	Solyc05g007140.2.1	Receptor-like protein kinase At3g21340 IPR002290 Serine_threonine protein kinase
TR44289_c0_g1	18.753	17.334	292.595	292.637	1.87284e-09	7.342e-07	Downregulated	LDHB_HORVU	Full=L-lactate dehydrogenase B	GO:0005737,GO:0004459,GO:0005975,GO:0019752	Solyc08g078850.2.1	L-lactate dehydrogenase IPR011304 L-lactate dehydrogenase
TR48412_c0_g1	4.467	17.205	94.544	97.987	1.44913e-05	0.000666144	Downregulated	WRKY6_ARATH	Full=WRKY transcription factor 6	GO:0005634,GO:0006351,GO:0016036,GO:0080169,GO:0043565,GO:0009873,GO:0010200,GO:0044212,GO:0045892,GO:0003700	Solyc02g080890.2.1	Transcription factor WRKY IPR003657 DNA-binding WRKY
TR66985_c0_g1	28.105	17.164	3.558	3.345	0.00047603	0.00944152	Upregulated	PLA1_ORYSJ	Full=Phospholipase A1-II 1	GO:0008970,GO:0016042,GO:0005737	Solyc02g077160.2.1	Lipase-like protein IPR002921 Lipase, class 3
TR45933_c0_g1	104.81	16.914	8.811	6.823	0.000517926	0.00999085	Upregulated	0	0	0	Solyc08g075760.2.1	CYCLOPS
TR66396_c0_g1	13.328	16.771	2.968	2.961	0.000416059	0.00853659	Upregulated	WTR18_ARATH	Full=WAT1-related protein At3g28050	GO:0016021,GO:0022857	Solyc02g087050.2.1	Nodulin MtN21 family protein IPR000620 Protein of unknown function DUF6, transmembrane
TR32150_c0_g1	3.903	16.69	96.116	105.531	9.59351e-06	0.000493731	Downregulated	ASOL_BRANA	Full=L-ascorbate oxidase homolog	GO:0005507,GO:0005576,GO:0016491	Solyc07g052230.2.1	Laccase-22 IPR001117 Multicopper oxidase, type 1
TR6483_c0_g1	3.682	16.69	70.787	78.34	8.39936e-05	0.00251379	Downregulated	TENAC_ARATH	Full=Probable aminopyrimidine aminohydrolase, mitochondrial {ECO:0000303|PubMed:25014715}	GO:0005829,GO:0005739	Solyc09g064510.2.1	Transcriptional activator TenA family IPR004305 TENA_THI-4 protein_Coenzyme PQQ biosynthesis protein C
TR39738_c4_g1	0	16.683	113.937	108.124	1.98113e-06	0.00014596	Downregulated	RBOHB_SOLTU	Full=Respiratory burst oxidase homolog protein B	GO:0005886,GO:0016174,GO:0005509,GO:0016021,GO:0004601	Solyc01g099620.2.1	Respiratory burst oxidase-like protein IPR013121 Ferric reductase, NAD binding
TR44042_c0_g1	24.619	16.622	2.377	0	3.44933e-06	0.000224908	Upregulated	DREB3_ARATH	Full=Dehydration-responsive element-binding protein 3	GO:0045893,GO:0043565,GO:0005634,GO:0003700,GO:0006351,GO:0009873	Solyc08g066660.1.1	Ethylene-responsive transcription factor 1 IPR001471 Pathogenesis-related transcriptional factor and ERF, DNA-binding
TR23826_c1_g2	27.516	16.608	149.564	117.227	4.46402e-05	0.00156977	Downregulated	0	0	0	0	0
TR61379_c0_g1	9.597	16.581	75.856	81.371	0.000243592	0.00564123	Downregulated	CNGC1_ARATH	Full=Cyclic nucleotide-gated ion channel 1	GO:0030552,GO:0005887,GO:0030553,GO:0005886,GO:0005216,GO:0042391,GO:0071805	Solyc05g050350.1.1	Cyclic nucleotide gated channel IPR000595 Cyclic nucleotide-binding
TR4727_c5_g7	39.42	16.534	294.037	315.669	1.10981e-07	1.50602e-05	Downregulated	P2C25_ARATH	Full=Probable protein phosphatase 2C 25	GO:0009620,GO:0004722,GO:0009611,GO:0005634,GO:0009738,GO:0009536,GO:0050832,GO:0046872,GO:0006470	Solyc06g007190.2.1	Integrin-linked kinase-associated serine_threonine phosphatase 2C IPR015655 Protein phosphatase 2C
TR2511_c0_g1	15.169	16.174	100.379	88.868	4.76237e-05	0.00164196	Downregulated	Y1491_ARATH	Full=Uncharacterized protein At1g04910	GO:0016021,GO:0005794,GO:0005768,GO:0016757,GO:0005802,GO:0000139	Solyc01g086640.2.1	Os03g0169000 protein (Fragment) IPR004348 Protein of unknown function DUF246, plant
TR32535_c1_g1	9.082	16.168	1.334	1.763	7.45001e-06	0.00040858	Upregulated	UGT9_GARJA	Full=Beta-D-glucosyl crocetin beta-1,6-glucosyltransferase	GO:0016758	Solyc11g007490.1.1	UDP-glucosyltransferase IPR002213 UDP-glucuronosyl_UDP-glucosyltransferase
TR10266_c0_g2	15.66	16.12	61.8	66.604	0.000458922	0.00919886	Downregulated	TPPA_ARATH	Full=Trehalose-phosphate phosphatase A	GO:0004805,GO:0005992,GO:0016311	Solyc03g083960.2.1	Trehalose 6-phosphate phosphatase IPR003337 Trehalose-phosphatase
TR66371_c0_g1	4.811	16.1	68.839	64.708	0.000135497	0.00361257	Downregulated	GATA5_ARATH	Full=GATA transcription factor 5	GO:0003700,GO:0008270,GO:0006351,GO:0005634,GO:0045893,GO:0043565	Solyc01g110310.2.1	GATA transcription factor 9 IPR016679 Transcription factor, GATA, plant
TR58821_c0_g1	5.842	15.991	0.659	1.488	7.62515e-06	0.000413896	Upregulated	0	0	0	Solyc08g061600.1.1	Mutator-like transposase IPR006564 Zinc finger, PMZ-type
TR31208_c0_g2	38.291	15.937	185.767	216.327	1.40213e-05	0.000653793	Downregulated	0	0	0	Solyc06g076080.1.1	Unknown Protein
TR3343_c0_g1	40.771	15.856	1.741	0.603	4.76188e-08	7.79427e-06	Upregulated	EXPA8_ARATH	Full=Expansin-A8	GO:0016020,GO:0005618,GO:0005576,GO:0009664,GO:0006949	Solyc06g049050.2.1	Expansin IPR007112 Expansin 45, endoglucanase-like IPR007117 Pollen allergen_expansin, C-terminal
TR23816_c1_g1	19.956	15.842	2.914	2.366	2.80397e-05	0.00110059	Upregulated	RN141_CHICK	Full=RING finger protein 141	GO:0051865,GO:0008270,GO:0003677,GO:0006355,GO:0004842	Solyc02g078460.2.1	Ring finger protein 141 IPR018957 Zinc finger, C3HC4 RING-type
TR39993_c0_g1	66.077	15.781	5.099	2.726	0.000257102	0.00586982	Upregulated	MPV17_DANRE	Full=Protein Mpv17	GO:0005743,GO:0016021	Solyc07g055340.2.1	Peroxisomal membrane protein 2 IPR007248 Mpv17_PMP22
TR43396_c2_g3	7.953	15.747	106.897	110.788	2.46333e-06	0.000172292	Downregulated	M3K1_ARATH	Full=Mitogen-activated protein kinase kinase kinase 1	GO:0000186,GO:0000165,GO:1902065,GO:0010449,GO:0009651,GO:0045087,GO:0003677,GO:0004674,GO:0005634,GO:0005524,GO:0009611,GO:0009409,GO:0006970,GO:0004709,GO:0019900,GO:0046777,GO:0022622	Solyc07g053170.2.1	Protein serine_threonine kinase IPR002290 Serine_threonine protein kinase
TR4733_c1_g2	4.713	15.652	58.364	55.37	0.000393885	0.00821775	Downregulated	KATAM_ARATH	Full=Xyloglucan galactosyltransferase KATAMARI1	GO:0005794,GO:0006486,GO:0005802,GO:0009863,GO:0032580,GO:0009826,GO:0005768,GO:0009969,GO:0010256,GO:0016757,GO:0030173,GO:0042353	Solyc07g049610.1.1	Galactosyltransferase-like protein (Fragment) IPR004263 Exostosin-like
TR24700_c2_g1	123.514	15.51	502.74	420.206	0.000258353	0.00588504	Downregulated	0	0	0	0	0
TR36781_c0_g1	18.581	15.483	65.549	67.153	0.000138592	0.00367656	Downregulated	CSLCC_ARATH	Full=Probable xyloglucan glycosyltransferase 12	GO:0016757,GO:0009506,GO:0016021,GO:0000139,GO:0071555	Solyc04g077470.2.1	Cellulose synthase-like C1-2 glycosyltransferase family 2 protein IPR001173 Glycosyl transferase, family 2
TR31090_c0_g2	4.148	15.435	133.775	114.297	5.93676e-07	5.5774e-05	Downregulated	LYK4_ARATH	Full=LysM domain receptor-like kinase 4	GO:0071219,GO:0046777,GO:0071323,GO:0045087,GO:0001653,GO:0007178,GO:0004675,GO:0008061,GO:0005524,GO:0005886,GO:0016021,GO:0031625,GO:0009755,GO:0009506	Solyc09g083210.2.1	Receptor-like protein kinase IPR002290 Serine_threonine protein kinase
TR65098_c0_g3	95.728	15.415	423.18	463.097	3.12011e-06	0.000207581	Downregulated	SCL13_ARATH	Full=Scarecrow-like protein 13	0,GO:0005737,GO:0005634,GO:0006355,GO:0006351	Solyc11g012510.1.1	GRAS family transcription factor IPR005202 GRAS transcription factor
TR63457_c0_g1	22.337	15.306	1.948	1.324	6.25595e-06	0.000362312	Upregulated	0	0	0	0	0
TR66825_c1_g1	13.427	15.096	2.185	2.977	0.000361725	0.00768824	Upregulated	SOX_ARATH	Full=Probable sarcosine oxidase	GO:0008115,GO:0046653	Solyc08g006430.2.1	N-methyl-L-tryptophan oxidase IPR006281 Sarcosine oxidase, monomeric
TR69277_c2_g3	35.346	14.994	1.81	0.533	1.68789e-07	2.09364e-05	Upregulated	GEML8_ARATH	Full=Putative GEM-like protein 8	0	Solyc11g011580.1.1	FIP1 IPR004182 GRAM
TR11574_c1_g1	42.538	14.94	321.068	326.911	2.69199e-07	3.04204e-05	Downregulated	NPK1_TOBAC	Full=Mitogen-activated protein kinase kinase kinase NPK1	0,GO:0005856,GO:0005634,GO:0005524,GO:0004709,GO:0009524,GO:0006952,GO:0000919	Solyc02g090970.1.1	Serine_threonine-protein kinase 24 IPR002290 Serine_threonine protein kinase
TR36422_c0_g3	2.847	14.94	59.56	63.698	0.000134609	0.00359192	Downregulated	AIFA_DICDI	Full=Apoptosis-inducing factor homolog A	GO:0005739,GO:0050660,GO:0043065,GO:0008137	Solyc11g006540.1.1	FAD-dependent pyridine nucleotide-disulphide oxidoreductase IPR001327 Pyridine nucleotide-disulphide oxidoreductase, NAD-binding region
TR52781_c0_g1	18.188	14.92	199.025	220.408	1.68777e-07	2.09364e-05	Downregulated	0	0	0	0	0
TR10273_c0_g1	14.948	14.865	1.212	1.065	1.08882e-07	1.48388e-05	Upregulated	0	0	0	0	0
TR48107_c0_g1	0	14.771	62.214	53.122	0.000246871	0.00568879	Downregulated	0	0	0	Solyc10g008730.2.1	Unknown Protein
TR37432_c0_g1	5.695	14.567	89.574	72.934	2.95336e-05	0.00115022	Downregulated	EF101_ARATH	Full=Ethylene-responsive transcription factor 2	GO:0045893,GO:0006351,GO:0005634,GO:0001944,GO:0003700,GO:0003677,GO:0009864,GO:0010200,GO:0009873,GO:0051301	Solyc08g078180.1.1	Ethylene-responsive transcription factor 1A IPR001471 Pathogenesis-related transcriptional factor and ERF, DNA-binding
TR37354_c0_g1	6.848	14.499	94.781	94.289	4.1888e-06	0.000259787	Downregulated	CFXQ_CYAME	Full=Protein cfxQ homolog	GO:0009507,GO:0005524	Solyc12g007100.1.1	Ankyrin repeat domain-containing protein 1 IPR000641 CbxX_CfqX
TR8769_c0_g1	9.916	14.472	77.742	70.325	5.41915e-05	0.00182095	Downregulated	PUB17_ARATH	Full=U-box domain-containing protein 17	GO:0004842,GO:0009814,GO:0070696,GO:0016874,GO:0005737,GO:0016567	Solyc02g072080.1.1	U-box domain-containing protein 17 IPR011989 Armadillo-like helical
TR66969_c0_g1	368.726	14.398	9.401	11.704	0.000241993	0.00561918	Upregulated	PPA1_ARATH	Full=Probable inactive purple acid phosphatase 1	GO:0046872,GO:0005576,GO:0003993	Solyc05g012260.2.1	Purple acid phosphatase IPR008963 Purple acid phosphatase-like, N-terminal
TR21377_c0_g1	8.493	14.303	2.224	2.335	0.000420689	0.00859624	Upregulated	0	0	0	Solyc06g065340.1.1	Unknown Protein
TR57212_c0_g1	64.187	14.242	4.448	3.416	4.05149e-05	0.00146527	Upregulated	AVT1_YEAST	Full=Vacuolar amino acid transporter 1	GO:0015188,GO:0000324,GO:0015803,GO:0000329,GO:0007034,GO:0015186,GO:0006868,GO:0003333,GO:1902475,GO:0098655,GO:0006865,GO:0015828,GO:0016021,GO:0015807,GO:0015804,GO:0006812,GO:0005302	Solyc03g013160.2.1	Amino acid transporter family protein IPR013057 Amino acid transporter, transmembrane
TR49583_c0_g1	4.05	14.235	74.483	69.722	3.71493e-05	0.00137008	Downregulated	Y232_RICCO	Full=UPF0392 protein RCOM_0530710	GO:0016021	Solyc05g006560.1.1	Ring zinc finger protein (Fragment) IPR008166 Protein of unknown function DUF23
TR22012_c0_g1	2.823	14.208	85.763	83.165	7.60933e-06	0.000413896	Downregulated	Y5614_ARATH	Full=Probable LRR receptor-like serine/threonine-protein kinase At1g56140	GO:0016021,GO:0004674,GO:0005524,GO:0005886	Solyc07g062620.2.1	Serine_threonine-protein kinase receptor IPR002290 Serine_threonine protein kinase
TR10336_c0_g1	10.137	13.964	144.158	143.722	5.67911e-08	8.75411e-06	Downregulated	DGK5_ARATH	Full=Diacylglycerol kinase 5	GO:0007205,GO:0006952,GO:0004143,GO:0005524	Solyc07g054830.2.1	Diacylglycerol kinase IPR016961 Diacylglycerol kinase, plant
TR10855_c0_g1	11.021	13.943	162.869	172.88	2.78121e-08	5.13584e-06	Downregulated	BCS1_SCHPO	Full=Probable mitochondrial chaperone bcs1	GO:0016021,GO:0005739,GO:0042623,GO:0005524,GO:0034551,GO:0016226,GO:0005743	Solyc10g007280.2.1	AAA-ATPase IPR003959 ATPase, AAA-type, core
TR31134_c0_g1	19.612	13.889	108.937	103.675	1.8145e-05	0.000790364	Downregulated	THIK2_ARATH	Full=3-ketoacyl-CoA thiolase 2, peroxisomal	GO:0005730,GO:0031408,GO:0016020,GO:0005777,GO:0003988,GO:0009514,GO:0010111,GO:0009507,GO:0005774,GO:0005739,GO:0009789,GO:0009611,GO:0009695,GO:0006635	Solyc09g061840.2.1	3-ketoacyl CoA thiolase 1 IPR002155 Thiolase
TR25847_c0_g1	7.364	13.889	0.836	1.308	1.70686e-05	0.000758723	Upregulated	EF115_ARATH	Full=Ethylene-responsive transcription factor ERF115	GO:0009873,GO:0005634,GO:0003700,GO:0003677,GO:0006351	Solyc06g068830.1.1	Ethylene responsive transcription factor 2b IPR001471 Pathogenesis-related transcriptional factor and ERF, DNA-binding
TR31437_c0_g2	18.581	13.821	274.03	280.236	1.93274e-09	7.48442e-07	Downregulated	RHDF1_DANRE	Full=Inactive rhomboid protein 1	GO:0042058,GO:0000139,GO:0016477,GO:0016021,GO:0050709,GO:0061136,GO:0050708,GO:0005789,GO:0015031,GO:0006508,GO:0008283	Solyc08g080500.2.1	Rhomboid family protein IPR002610 Peptidase S54, rhomboid
TR25756_c0_g1	709.839	13.753	3.297	4.497	4.45957e-06	0.000273377	Upregulated	0	0	0	0	0
TR8813_c3_g2	0	13.74	66.508	69.174	7.08953e-05	0.00225572	Downregulated	PUP1_ARATH	Full=Purine permease 1	GO:0015860,GO:0005887,GO:0005345,GO:0015211,GO:0010184,GO:0006863	Solyc12g087870.1.1	Purine permease family protein IPR004853 Protein of unknown function DUF250
TR51525_c0_g1	8.026	13.665	118.791	118.269	3.83632e-07	4.0044e-05	Downregulated	CSLD3_ARATH	Full=Cellulose synthase-like protein D3	GO:0005783,GO:0005768,GO:0005794,GO:0051753,GO:0071555,GO:0000139,GO:0030244,GO:0016760,GO:0005886,GO:0005802,GO:0009409,GO:0016021,GO:0097502	Solyc03g097050.2.1	Cellulose synthase-like protein IPR005150 Cellulose synthase
TR65225_c0_g1	0	13.652	0.767	0	0.000188298	0.00465572	Upregulated	0	0	0	0	0
TR53933_c1_g6	0	13.631	57.475	69.957	0.000107107	0.00301247	Downregulated	0	0	0	Solyc10g080700.1.1	Casein kinase-like protein IPR002290 Serine_threonine protein kinase
TR15243_c0_g1	3.878	13.624	1.649	1.723	0.000356116	0.00758932	Upregulated	WTR14_ARATH	Full=WAT1-related protein At2g39510	GO:0022857,GO:0016021	Solyc06g031710.2.1	Nodulin-like protein IPR000620 Protein of unknown function DUF6, transmembrane
TR43206_c0_g1	8.665	13.333	210.336	208.125	1.10819e-09	4.95628e-07	Downregulated	CIGR1_ORYSJ	Full=Chitin-inducible gibberellin-responsive protein 1	GO:0006351,GO:0006355,GO:0005634	Solyc07g063940.1.1	GRAS family transcription factor IPR005202 GRAS transcription factor
TR19031_c0_g1	26.927	13.306	209.454	202.187	3.95238e-07	4.10144e-05	Downregulated	0	0	0	Solyc04g005480.1.1	Unknown Protein
TR5876_c0_g1	2493.06	13.265	20.153	15.48	0.000123584	0.00336559	Upregulated	0	0	0	Solyc04g082640.2.1	Unknown Protein
TR20886_c0_g1	0	13.184	129.542	127.537	4.92167e-07	4.84098e-05	Downregulated	0	0	0	Solyc01g005420.2.1	SRC2-like protein IPR018029 C2 membrane targeting protein
TR4688_c1_g1	13.279	13.068	59.231	60.392	0.000449746	0.00904409	Downregulated	ALL9_OLEEU	Full=Glucan endo-1,3-beta-D-glucosidase	GO:0005975,GO:0005576,GO:0042973	Solyc01g109570.2.1	Glucan endo-1 3-beta-glucosidase 7 IPR013781 Glycoside hydrolase, subgroup, catalytic core IPR000490 Glycoside hydrolase, family 17
TR35600_c0_g1	30.044	13.001	127.265	128.101	0.000236293	0.00552115	Downregulated	PERK1_ARATH	Full=Proline-rich receptor-like protein kinase PERK1	GO:0046777,GO:0031625,GO:0016021,GO:0004674,GO:0009755,GO:0009611,GO:0009620,GO:0001653,GO:0005524,GO:0009506,GO:0004672,GO:0004675,GO:0005886,GO:0007178	Solyc12g007110.1.1	Receptor-like protein kinase At5g59670 IPR002290 Serine_threonine protein kinase
TR31070_c0_g1	18.36	13.001	203.688	193.319	2.64034e-08	5.03189e-06	Downregulated	RAV1_ARATH	Full=AP2/ERF and B3 domain-containing transcription factor RAV1	GO:0003677,GO:0003700,GO:0009741,GO:0005634,GO:0006351,GO:0048527,GO:0009873,GO:0048366,GO:0045892,GO:0009910	Solyc05g009790.1.1	Transcription factor IPR003340 Transcriptional factor B3
TR39984_c0_g1	93.888	12.953	5.475	3.126	0.000215613	0.00517112	Upregulated	Y5161_ARATH	Full=Uncharacterized protein At5g01610	0	Solyc03g115640.2.1	Os03g0210500 protein (Fragment) IPR007493 Protein of unknown function DUF538
TR47602_c1_g1	4.026	12.953	50.995	45.703	0.000470402	0.00935326	Downregulated	0	0	0	Solyc05g008110.2.1	Unknown Protein
TR25195_c0_g1	2.823	12.872	49.177	49.385	0.000266349	0.00602827	Downregulated	AGD8_ARATH	Full=Probable ADP-ribosylation factor GTPase-activating protein AGD8	GO:0005096,GO:0005829,GO:0046872	Solyc08g076920.2.1	ADP-ribosylation factor GTPase-activating protein 3 IPR001164 Arf GTPase activating protein
TR4476_c0_g1	4.688	12.783	60.412	63.925	8.26073e-05	0.00248636	Downregulated	PR1B4_ARATH	Full=PRA1 family protein B4	GO:0005794,GO:0005829,GO:0005802,GO:0005783,GO:0010008,GO:0016192,GO:0005768,GO:0016021	Solyc10g076360.1.1	Prenylated rab acceptor PRA1 IPR004895 Prenylated rab acceptor PRA1
TR18308_c0_g1	12.027	12.743	69.276	61.191	0.000221953	0.00528215	Downregulated	P2C02_ARATH	Full=Probable protein phosphatase 2C 2	GO:0046872,GO:0004722,GO:0006470	Solyc06g082080.2.1	Integrin-linked kinase-associated serine_threonine phosphatase 2C IPR015655 Protein phosphatase 2C
TR41375_c1_g1	0	12.743	58.686	56.068	0.00012568	0.00340346	Downregulated	0	0	0	Solyc01g110480.2.1	BZIP transcription factor family protein expressed IPR011616 bZIP transcription factor, bZIP-1
TR42592_c0_g1	5.965	12.695	115.133	104.591	3.76891e-07	4.00261e-05	Downregulated	TMVRN_NICGU	Full=TMV resistance protein N	GO:0005524,GO:0005737,GO:0043531,GO:0009626,GO:0007165	Solyc01g102840.2.1	Tir-nbs, resistance protein fragment
TR57156_c0_g1	14.924	12.668	78.302	77.666	8.09691e-05	0.00245674	Downregulated	Y232_RICCO	Full=UPF0392 protein RCOM_0530710	GO:0016021	Solyc05g006560.1.1	Ring zinc finger protein (Fragment) IPR008166 Protein of unknown function DUF23
TR34103_c0_g1	12.003	12.641	1.81	2.844	0.000392978	0.00820423	Upregulated	CXE1_ARATH	Full=Probable carboxylesterase 1	GO:0052689	Solyc01g108520.1.1	Acetyl esterase IPR013094 Alpha_beta hydrolase fold-3
TR17561_c0_g2	0	12.58	0	0	1.01776e-05	0.0005178	Upregulated	WTR45_ARATH	Full=WAT1-related protein At5g64700	GO:0022857,GO:0016021	Solyc00g052940.2.1	Nodulin-like protein IPR000620 Protein of unknown function DUF6, transmembrane
TR4115_c0_g2	0	12.485	126.85	96.413	1.40271e-06	0.0001108	Downregulated	0	0	0	0	0
TR70547_c2_g1	20.398	12.478	3.152	2.538	8.78855e-05	0.00260815	Upregulated	P2C34_ARATH	Full=Probable protein phosphatase 2C 34	GO:0006470,GO:0046872,GO:0004722	Solyc01g065700.2.1	Integrin-linked kinase-associated serine_threonine phosphatase 2C IPR015655 Protein phosphatase 2C
TR31103_c0_g1	3.485	12.377	93.708	91.837	1.04747e-06	8.57248e-05	Downregulated	HMT1_BRAOT	Full=Homocysteine S-methyltransferase 1	0,GO:0033528,GO:0008898,GO:0009086,GO:0008270,GO:0005829,GO:0047150	Solyc09g065520.2.1	Homocysteine s-methyltransferase IPR003726 Homocysteine S-methyltransferase
TR50592_c1_g3	14.163	12.349	56.485	60.047	0.00050603	0.00983064	Downregulated	XB31_ARATH	Full=Putative E3 ubiquitin-protein ligase XBAT31	GO:0016874,GO:0008270,GO:0016567	Solyc06g076050.2.1	Ankyrin repeat domain-containing protein 28 IPR002110 Ankyrin
TR884_c1_g1	83.308	12.295	4.517	3.369	9.12755e-05	0.00267871	Upregulated	AUR1_ARATH	Full=Serine/threonine-protein kinase Aurora-1	GO:0009524,GO:0005819,GO:0007067,GO:0032133,GO:0004674,GO:0051233,GO:0000780,GO:0043987,GO:0005524,GO:0007052,GO:0005876,GO:0016572,GO:0009504,GO:0005730,GO:0031616,GO:0005874,GO:0005634,GO:0031965,GO:0032465,GO:0035175,GO:0051301	Solyc08g066050.2.1	Serine_threonine-protein kinase 6 IPR002290 Serine_threonine protein kinase
TR54831_c0_g1	9.18	12.255	75.434	75.833	1.80696e-05	0.000789246	Downregulated	BH013_ARATH	Full=Transcription factor bHLH13	GO:0044212,GO:0003700,GO:0006355,GO:0005634,GO:0006351	Solyc05g050560.1.1	Transcription factor IPR011598 Helix-loop-helix DNA-binding
TR39765_c1_g1	10.702	12.234	163.521	163.698	5.6718e-08	8.75411e-06	Downregulated	MY108_ARATH	Full=Transcription factor MYB108	GO:0006351,GO:0005634,GO:0003700,GO:0006952,GO:0009620,GO:0003677,GO:0009753,GO:0009723,GO:0009651,GO:0009737	Solyc12g099140.1.1	MYB transcription factor IPR015495 Myb transcription factor
TR8743_c3_g1	30.289	12.2	105.801	90.521	0.000418268	0.00856444	Downregulated	ERF3_TOBAC	Full=Ethylene-responsive transcription factor 3	GO:0003700,GO:0003677,GO:0005634,GO:0006351,GO:0006952,GO:0009873	Solyc10g006130.1.1	Ethylene responsive transcription factor 3a IPR001471 Pathogenesis-related transcriptional factor and ERF, DNA-binding
TR51733_c0_g1	252.036	12.16	7.308	6.197	0.000111794	0.00310376	Upregulated	0	0	0	Solyc06g007800.2.1	Mitochondrial import inner membrane translocase subunit Tim17_Tim22_Tim23 family protein IPR003397 Mitochondrial inner membrane translocase complex, subunit Tim17_22
TR44802_c0_g1	31.59	12.16	1.963	3.369	0.000347685	0.00743599	Upregulated	NFYC4_ARATH	Full=Nuclear transcription factor Y subunit C-4	GO:0006351,GO:0003700,GO:0016602,GO:0009738,GO:0043565	Solyc05g015330.1.1	Nuclear transcription factor Y subunit C-1 IPR003958 Transcription factor CBF_NF-Y_archaeal histone
TR62180_c0_g1	84.658	11.976	4.356	1.747	0.000276712	0.00620092	Upregulated	TM234_DICDI	Full=Transmembrane protein 234 homolog	GO:0016021	Solyc11g006870.1.1	Novel protein similar to H.sapiens C1orf91 chromosome 1 open reading frame 91 (C1orf91) IPR018908 Uncharacterised protein family UPF0546
TR31079_c0_g1	4.713	11.841	184.824	195.935	1.32046e-09	5.44544e-07	Downregulated	4CLLA_ARATH	Full=Oxalate--CoA ligase {ECO:0000305}	GO:0048046,GO:0010030,GO:0005524,GO:0005737,GO:0009506,GO:0009507,GO:0009570,GO:0009735,GO:0010214,GO:0033611,GO:0046686,GO:0050203,GO:0050832	Solyc06g035960.2.1	4-coumarate-CoA ligase-like protein IPR000873 AMP-dependent synthetase and ligase
TR21358_c2_g2	10.947	11.834	134.013	134.564	1.1873e-07	1.59079e-05	Downregulated	G2OX1_PEA	Full=Gibberellin 2-beta-dioxygenase 1	GO:0045543,GO:0009686,GO:0005506	Solyc07g056670.2.1	Gibberellin 2-oxidase 2 IPR005123 Oxoglutarate and iron-dependent oxygenase
TR32566_c0_g1	29.136	11.827	94.444	104.677	9.98225e-05	0.00285051	Downregulated	PLP3_ARATH	Full=Patatin-like protein 3	GO:0006952,GO:0005737,GO:0004620,GO:0009737,GO:0016042,GO:0047372	Solyc02g090490.2.1	Patatin-like protein 3 IPR002641 Patatin
TR30770_c0_g1	6.922	11.793	1.764	1.849	0.000518784	0.00999085	Upregulated	0	0	0	Solyc06g075660.2.1	MYB transcription factor IPR015495 Myb transcription factor
TR8770_c0_g3	14.433	11.78	67.137	65.931	0.000287208	0.0064	Downregulated	PCO2_ARATH	Full=Plant cysteine oxidase 2 {ECO:0000303|PubMed:24599061}	GO:0005634,GO:0017172,GO:0001666,GO:0005829,GO:0046872,GO:0018171,GO:0070483	Solyc02g087740.2.1	Cupin RmlC-type IPR012864 Protein of unknown function DUF1637
TR53179_c0_g1	19.489	11.746	88.033	113.553	2.05936e-05	0.00086843	Downregulated	0	0	0	Solyc08g075860.2.1	Os06g0115800 protein (Fragment)
TR60448_c0_g1	3.706	11.746	99.145	87.443	7.59136e-07	6.79031e-05	Downregulated	ATPB_NICPL	Full=ATP synthase subunit beta, chloroplastic {ECO:0000255|HAMAP-Rule:MF_01347}	GO:0009535,GO:0015986,GO:0005524,GO:0015991,GO:0045261,GO:0046933	Solyc01g007320.2.1	ATP synthase subunit beta chloroplastic IPR005722 ATPase, F1 complex, beta subunit
TR37397_c0_g1	11.684	11.739	130.777	136.726	9.07666e-08	1.27538e-05	Downregulated	CIPKE_ARATH	Full=CBL-interacting serine/threonine-protein kinase 14	GO:0009506,GO:0005634,GO:0005773,GO:0005524,GO:0004674,GO:0007165	Solyc09g018280.1.1	Calcium_calmodulin-dependent protein kinase type 1 IPR002290 Serine_threonine protein kinase
TR52620_c0_g1	6.529	11.739	75.028	72.119	7.61247e-06	0.000413896	Downregulated	BH013_ARATH	Full=Transcription factor bHLH13	GO:0044212,GO:0003700,GO:0006355,GO:0005634,GO:0006351	Solyc01g096050.2.1	Transcription factor IPR011598 Helix-loop-helix DNA-binding
TR21500_c0_g1	8.665	11.726	74.928	74.595	5.04569e-05	0.00173025	Downregulated	0	0	0	0	0
TR31279_c0_g1	3.363	11.692	55.488	56.89	5.56704e-05	0.00186473	Downregulated	TPS7_ARATH	Full=Probable alpha,alpha-trehalose-phosphate synthase [UDP-forming] 7	GO:0016757,GO:0005992,GO:0005829	Solyc02g072150.2.1	Alpha alpha-trehalose-phosphate synthase (UDP-forming) IPR001830 Glycosyl transferase, family 20
TR18049_c0_g1	0	11.692	175.499	182.1	1.29522e-08	2.89636e-06	Downregulated	C7A10_PANGI	Full=Cytochrome P450 CYP73A100	GO:0016705,GO:0016021,GO:0004497,GO:0005506,GO:0020037	Solyc05g047530.2.1	Cytochrome P450
TR4644_c0_g1	12.715	11.685	117.119	108.328	1.92256e-06	0.000141974	Downregulated	Y3721_ARATH	Full=Uncharacterized protein At3g27210	GO:0005886	Solyc02g094030.2.1	Unknown Protein
TR32482_c0_g1	14.899	11.631	2.354	2.209	7.70057e-05	0.00238793	Upregulated	AAE1_ARATH	Full=Probable acyl-activating enzyme 1, peroxisomal	GO:0005777,GO:0006631,GO:0016874	Solyc02g082910.2.1	Acyl-CoA synthetase_AMP-acid ligase II IPR000873 AMP-dependent synthetase and ligase
TR43942_c0_g2	10.849	11.583	128.284	131.313	3.18662e-07	3.53803e-05	Downregulated	SBIR1_ARATH	Full=Leucine-rich repeat receptor-like serine/threonine/tyrosine-protein kinase SOBIR1	GO:0005886,GO:0001653,GO:0010942,GO:0005524,GO:0009506,GO:0009755,GO:0004713,GO:0004714,GO:0007178,GO:0004675,GO:0031625,GO:0046777,GO:0018108,GO:0031349,GO:0006952,GO:0016021,GO:0004674	Solyc06g071810.1.1	Receptor like kinase, RLK
TR39750_c1_g1	6.136	11.576	64.292	57.023	6.35398e-05	0.00205882	Downregulated	0	0	0	Solyc02g072220.1.1	Unknown Protein
TR1796_c0_g1	6.848	11.536	0.391	1.222	1.062e-05	0.000531905	Upregulated	0	0	0	0	0
TR60307_c0_g1	0	11.447	77.136	73.71	1.0286e-05	0.000520927	Downregulated	PAL5_SOLLC	Full=Phenylalanine ammonia-lyase	GO:0045548,GO:0009800,GO:0006559,GO:0005737	Solyc10g086180.1.1	Phenylalanine ammonia-lyase IPR005922 Phenylalanine ammonia-lyase
TR63779_c0_g1	0	11.386	36.003	46.91	0.000512114	0.00991565	Downregulated	ALA9_ARATH	Full=Putative phospholipid-transporting ATPase 9 {ECO:0000303|PubMed:11402198}	GO:0016021,GO:0004012,GO:0000287,GO:0005524	Solyc05g010120.2.1	Phospholipid-transporting ATPase IPR006539 ATPase, P-type, phospholipid-translocating, flippase
TR46545_c0_g1	56.971	11.373	418.073	436.704	5.99634e-07	5.61675e-05	Downregulated	0	0	0	Solyc06g036110.1.1	C2 domain-containing protein IPR018029 C2 membrane targeting protein
TR43398_c0_g1	2.798	11.278	35.934	36.122	0.000515602	0.00996496	Downregulated	Y4729_ARATH	Full=G-type lectin S-receptor-like serine/threonine-protein kinase At4g27290	GO:0048544,GO:0005524,GO:0005516,GO:0030246,GO:0004674	Solyc02g030300.2.1	Serine_threonine-protein kinase receptor IPR002290 Serine_threonine protein kinase
TR41372_c0_g1	9.008	11.217	1.879	1.606	0.00010675	0.00300774	Upregulated	0	0	0	Solyc12g007140.1.1	Genomic DNA chromosome 3 P1 clone MSD24
TR51095_c0_g2	8.198	11.183	84.59	79.068	1.66906e-05	0.000746467	Downregulated	THIK2_ARATH	Full=3-ketoacyl-CoA thiolase 2, peroxisomal	GO:0005730,GO:0031408,GO:0016020,GO:0005777,GO:0003988,GO:0009514,GO:0010111,GO:0009507,GO:0005774,GO:0005739,GO:0009789,GO:0009611,GO:0009695,GO:0006635	Solyc09g061840.2.1	3-ketoacyl CoA thiolase 1 IPR002155 Thiolase
TR1922_c0_g2	15.66	11.075	141.39	137.267	2.8615e-07	3.21075e-05	Downregulated	CX32_ARATH	Full=Probable serine/threonine-protein kinase Cx32, chloroplastic	GO:0004674,GO:0005524,GO:0009507	Solyc04g082500.2.1	ATP binding _ serine-threonine kinase IPR002290 Serine_threonine protein kinase
TR16935_c0_g1	9.892	11	222.521	217.071	4.92242e-10	2.77893e-07	Downregulated	NAMA1_TRITD	Full=NAC transcription factor NAM-A1	GO:0003677,GO:0006351,GO:0006355,GO:0005634	Solyc01g009860.2.1	NAC domain transcription factor protein
TR33210_c0_g1	3.878	10.946	45.382	51.759	0.000163374	0.00418708	Downregulated	VAP42_ARATH	Full=Vesicle-associated protein 4-2	GO:0005789	Solyc02g079230.2.1	Vesicle-associated membrane family protein IPR000535 Major sperm protein
TR68432_c1_g1	18.09	10.898	85.679	93.522	7.25085e-05	0.00227804	Downregulated	0	0	0	Solyc03g081330.1.1	Avr9_Cf-9 rapidly elicited protein 65
TR57055_c0_g1	17.427	10.898	2.906	1.543	0.000498251	0.00970642	Upregulated	MYBA1_ORYSJ	Full=Myb-related protein MYBAS1	GO:0006355,GO:0003677,GO:0005634,GO:0006351	Solyc06g005310.2.1	MYB transcription factor IPR015495 Myb transcription factor
TR9048_c0_g1	13.058	10.857	63.31	64.951	7.94298e-05	0.00242754	Downregulated	VAC8_DEBHA	Full=Vacuolar protein 8	GO:0005774	Solyc02g083820.1.1	Armadillo_beta-catenin repeat family protein IPR011989 Armadillo-like helical
TR14055_c0_g1	2.798	10.817	43.104	40.885	0.000280335	0.00626328	Downregulated	RLK1_ARATH	Full=G-type lectin S-receptor-like serine/threonine-protein kinase RLK1	GO:0005886,GO:0005516,GO:0016021,GO:0005524,GO:0030246,GO:0004674	Solyc09g075910.1.1	Receptor-like protein kinase IPR002290 Serine_threonine protein kinase
TR23833_c1_g2	4.173	10.769	305.256	303.002	2.71888e-12	8.63354e-09	Downregulated	SPE2_ARATH	Full=Arginine decarboxylase 2	GO:0009409,GO:0008295,GO:0008792,GO:0006979,GO:0006970,GO:0006596,GO:0006527,GO:0009446,GO:0009611,GO:0009651,GO:0009737,GO:0009753,GO:0080167,GO:0033388	Solyc10g054440.1.1	Arginine decarboxylase IPR002985 Arginine decarboxylase
TR71826_c0_g2	5.547	10.695	77.612	70.521	1.07185e-05	0.000534308	Downregulated	0	0	0	Solyc08g067630.2.1	Unknown Protein
TR24481_c0_g1	5.351	10.627	61.056	67.944	2.9848e-05	0.00115726	Downregulated	TLP1_PRUPE	Full=Thaumatin-like protein 1	GO:0006952,GO:0005576	Solyc04g081550.2.1	Thaumatin-like protein IPR001938 Thaumatin, pathogenesis-related
TR25067_c0_g2	0	10.627	158.866	163.534	1.24817e-08	2.81094e-06	Downregulated	WRK41_ARATH	Full=Probable WRKY transcription factor 41	GO:0005634,GO:0003700,GO:0006351,GO:0043565	Solyc08g008280.2.1	WRKY transcription factor-30 IPR003657 DNA-binding WRKY
TR54907_c0_g1	9.769	10.559	53.924	52.55	0.000225617	0.00532972	Downregulated	CBSX2_ARATH	Full=CBS domain-containing protein CBSX2, chloroplastic	GO:0009507,GO:0045454,GO:0009570	Solyc01g107860.2.1	CBS domain-containing protein-like IPR000644 Cystathionine beta-synthase, core
TR35617_c2_g3	4.075	10.478	48.395	47.701	7.69416e-05	0.00238793	Downregulated	GRDP2_ARATH	Full=Glycine-rich domain-containing protein 2 {ECO:0000303|PubMed:25653657}	GO:2000028,GO:0009734,GO:0071470,GO:0010928	Solyc02g063450.2.1	Hypothetical YFW family protein 5 IPR009836 Protein of unknown function DUF1399
TR1820_c0_g1	10.972	10.451	1.917	1.951	0.000240285	0.00558976	Upregulated	FIT_ARATH	Full=Transcription factor FER-LIKE IRON DEFICIENCY-INDUCED TRANSCRIPTION FACTOR	GO:0006351,GO:0005634,GO:0003700,GO:0003677,GO:0071732,GO:0071369,GO:0071281,GO:0034756,GO:0006355,GO:0010039	Solyc06g051550.2.1	Transcription Factor IPR001092 Basic helix-loop-helix dimerisation region bHLH
TR31683_c0_g1	16.028	10.437	146.459	157.909	3.37084e-07	3.69095e-05	Downregulated	0	0	0	Solyc01g006390.2.1	Cysteine-rich extensin-like protein-4
TR45923_c0_g1	5.842	10.403	48.203	48.947	0.00014378	0.00379517	Downregulated	ETR2_ARATH	Full=Ethylene receptor 2	GO:0005789,GO:0023014,GO:0005783,GO:0004674,GO:0000160,GO:0004872,GO:0051740,GO:0005524,GO:0000156,GO:0000155,GO:0009927,GO:0018106,GO:0046872,GO:0009873,GO:0016021,GO:0010105	Solyc06g053710.2.1	Ethylene receptor IPR001789 Signal transduction response regulator, receiver region IPR014525 Signal transduction histidine kinase, hybrid-type, ethylene sensor IPR005467 Signal transduction histidine kinase, core
TR47716_c1_g1	4.934	10.396	43.127	48.86	2.17272e-05	0.000903286	Downregulated	DRL27_ARATH	Full=Disease resistance protein At4g27190	1,GO:0043531,GO:0006952,GO:0005524	Solyc04g005540.2.1	Cc-nbs-lrr, resistance protein
TR51165_c1_g1	241.285	10.349	5.168	5.46	5.51614e-05	0.00184963	Upregulated	P2C08_ORYSJ	Full=Probable protein phosphatase 2C 8	GO:0046872,GO:0006470,GO:0004722	Solyc03g007230.2.1	Protein phosphatase 2C IPR015655 Protein phosphatase 2C
TR40739_c0_g1	8.591	10.335	51.478	56.365	0.000162063	0.00416017	Downregulated	AT21A_ARATH	Full=Putative RING-H2 finger protein ATL21A	GO:0016567,GO:0016021,GO:0008270	Solyc03g083470.2.1	Receptor like kinase, RLK
TR42541_c0_g1	2.651	10.267	1.564	0.47	0.000171847	0.00436961	Upregulated	SMYD3_MOUSE	Full=Histone-lysine N-methyltransferase SMYD3	GO:0000979,GO:0033138,GO:0001162,GO:0000993,GO:0018024,GO:0005737,GO:0005634,GO:0014904,GO:0006469,GO:0006334,GO:0045184,GO:0045944,GO:0046872,GO:0071549	Solyc05g007760.1.1	SET domain protein IPR011990 Tetratricopeptide-like helical
TR36460_c0_g1	11.463	10.261	137.057	140.573	1.48382e-08	3.09981e-06	Downregulated	ACA12_ARATH	Full=Calcium-transporting ATPase 12, plasma membrane-type	GO:0005388,GO:0005524,GO:0016021,GO:0046872	Solyc09g082870.1.1	Calcium-transporting ATPase 1 IPR006408 ATPase, P-type, calcium-transporting, PMCA-type
TR69653_c0_g1	11.217	10.227	249.123	264.365	1.12446e-10	1.05018e-07	Downregulated	STAR7_MOUSE	Full=StAR-related lipid transfer protein 7, mitochondrial	GO:1903955,GO:0008289,GO:0005739	Solyc08g083330.2.1	Membrane related protein IPR002913 Lipid-binding START
TR25955_c0_g1	19.759	10.193	325.707	305.845	1.76452e-09	7.00381e-07	Downregulated	CHK1_DROME	Full=Serine/threonine-protein kinase grp	GO:0006468,GO:0005524,GO:0005634,GO:0004672,GO:0005829,GO:0001700,GO:0000077,GO:0004674,GO:0007095,GO:0007093,GO:0009314,GO:0051225,GO:0007050,GO:0007348,GO:0007349,GO:0007444,GO:0042060,GO:0000075,GO:0033314,GO:0016321,GO:0051299	Solyc02g090970.1.1	Serine_threonine-protein kinase 24 IPR002290 Serine_threonine protein kinase
TR68093_c0_g1	8.836	10.125	46.455	57.728	0.000293805	0.00650592	Downregulated	IP5P2_ARATH	Full=Type I inositol polyphosphate 5-phosphatase 2 {ECO:0000303|PubMed:11402208}	GO:0090351,GO:0032957,GO:0009738,GO:0052658,GO:0052659,GO:0009845,GO:0046856,GO:0004445,GO:0009737,GO:0046855,GO:0034485,GO:0004439	Solyc08g077210.2.1	Inositol 1 4 5-trisphosphate 5-phosphatase IPR000300 Inositol polyphosphate related phosphatase
TR46543_c0_g1	4.173	10.105	41.003	36.326	0.000517258	0.00999085	Downregulated	P2C12_ARATH	Full=Probable protein phosphatase 2C 12	GO:0046872,GO:0005829,GO:0006470,GO:0004722	Solyc04g079120.2.1	Protein phosphatase 2C containing protein expressed IPR015655 Protein phosphatase 2C
TR22055_c0_g1	2.675	10.098	66.815	60.909	1.24931e-05	0.000597448	Downregulated	XLG1_ARATH	Full=Extra-large guanine nucleotide-binding protein 1	GO:0003924,GO:0001664,GO:0005834,GO:0004871,GO:0005525,GO:0005634,GO:0046872,GO:0007188,GO:0031683	Solyc01g109110.2.1	Guanine nucleotide-binding protein alpha-1 subunit, alpha subunit
TR44276_c0_g1	4.369	10.078	55.703	51.524	5.83688e-05	0.0019347	Downregulated	C81E1_GLYEC	Full=Isoflavone 2'-hydroxylase	GO:0033773,GO:0020037,GO:0016020,GO:0005506	Solyc07g014670.2.1	Cytochrome P450
TR51896_c0_g1	21.772	10.037	75.986	79.499	0.000204167	0.00494895	Downregulated	Y3272_ARATH	Full=Kelch repeat-containing protein At3g27220	GO:0005768,GO:0005802,GO:0009061,GO:0016021,GO:0005794,GO:0000139	Solyc02g093910.2.1	Kelch repeat-containing protein-like IPR015915 Kelch-type beta propeller
TR49541_c0_g1	9.376	9.976	1.258	1.246	7.66547e-05	0.00238608	Upregulated	C76A2_SOLME	Full=Cytochrome P450 76A2	GO:0004497,GO:0005506,GO:0020037,GO:0016705	Solyc09g008910.1.1	Cytochrome P450
TR1884_c0_g1	0	9.969	57.896	46.824	4.60207e-05	0.00159884	Downregulated	TI10A_ARATH	Full=Protein TIFY 10A	GO:0005634,GO:1900067,GO:0006351,GO:0006355,GO:0009753,GO:0009555,GO:0042742,GO:0009908,GO:0009867	Solyc12g009220.1.1	Jasmonate ZIM-domain protein 1 IPR010399 Tify
TR8798_c2_g1	15.096	9.908	69.077	89.667	3.13466e-05	0.00120652	Downregulated	ACTA_PHYPO	Full=Actin, plasmodial isoform	0,GO:0005856,GO:0005524,GO:0005737	Solyc01g104770.2.1	Actin IPR004000 Actin_actin-like
TR34869_c0_g1	4.664	9.908	46.432	44.654	0.000172785	0.0043819	Downregulated	ARID2_ARATH	Full=AT-rich interactive domain-containing protein 2	GO:0003677,GO:0005773,GO:0005634,GO:0006355,GO:0006351	Solyc03g115440.1.1	ARID_BRIGHT DNA-binding domain-containing protein_ELM2 domain-containing protein_Myb-like DNA-binding domain-containing protein IPR001005 SANT, DNA-binding
TR10898_c0_g1	5.253	9.894	149.212	143.33	2.23819e-09	8.2171e-07	Downregulated	C94C1_ARATH	Full=Cytochrome P450 94C1	GO:0009611,GO:0005506,GO:0020037,GO:0016021,GO:0043231,GO:0018685	Solyc06g074420.1.1	Cytochrome P450
TR5887_c0_g1	0	9.847	37.184	44.881	0.00017827	0.00449269	Downregulated	0	0	0	Solyc01g105700.2.1	Unknown Protein
TR54881_c0_g1	7.511	9.65	105.509	100.228	2.0768e-07	2.47504e-05	Downregulated	E1314_ARATH	Full=Glucan endo-1,3-beta-glucosidase 14	GO:0005576,GO:0005634,GO:0005618,GO:0005737,GO:0006952,GO:0042973,GO:0046658,GO:0005975,GO:0071555	Solyc11g068440.1.1	Glucan endo-1 3-beta-glucosidase 7 IPR000490 Glycoside hydrolase, family 17
TR8507_c0_g1	6.971	9.583	1.227	1.833	0.00034897	0.00745205	Upregulated	WTR37_ARATH	Full=WAT1-related protein At4g30420	GO:0022857,GO:0016021	Solyc07g006290.1.1	Nodulin-like protein IPR000620 Protein of unknown function DUF6, transmembrane
TR55576_c0_g1	0	9.576	101.882	106.244	2.37983e-07	2.7681e-05	Downregulated	CSLD3_ARATH	Full=Cellulose synthase-like protein D3	GO:0005783,GO:0005768,GO:0005794,GO:0051753,GO:0071555,GO:0000139,GO:0030244,GO:0016760,GO:0005886,GO:0005802,GO:0009409,GO:0016021,GO:0097502	Solyc03g097050.2.1	Cellulose synthase-like protein IPR005150 Cellulose synthase
TR66510_c0_g1	10.407	9.555	131.244	143.8	2.78917e-08	5.13584e-06	Downregulated	YAI5_SCHPO	Full=Uncharacterized protein C24B11.05	GO:0006206,GO:0016311,GO:0047405,GO:0008252,GO:0005829,GO:0005737,GO:0005634	Solyc06g076300.2.1	Pyrimidine 5_apos-nucleotidase IPR010237 Pyrimidine 5-nucleotidase
TR56388_c0_g1	7.609	9.535	178.773	165.524	7.94877e-09	2.10338e-06	Downregulated	WRK41_ARATH	Full=Probable WRKY transcription factor 41	GO:0005634,GO:0003700,GO:0006351,GO:0043565	Solyc01g095630.2.1	WRKY transcription factor IPR003657 DNA-binding WRKY
TR17868_c0_g1	0	9.528	59.974	37.956	0.000101425	0.00288073	Downregulated	0	0	0	0	0
TR37327_c0_g1	2.283	9.521	1.158	1.41	0.000511178	0.00991148	Upregulated	CAAT7_ARATH	Full=Cationic amino acid transporter 7, chloroplastic	GO:0015179,GO:0003333,GO:1902475,GO:0005887,GO:0031969,GO:0015807,GO:0015297	Solyc11g006710.1.1	Cationic amino acid transporter IPR015606 Cationic amino acid transporter
TR18628_c0_g1	7.045	9.42	49.43	46.675	0.000150342	0.00392592	Downregulated	Y2027_ARATH	Full=Inactive receptor-like serine/threonine-protein kinase At2g40270	GO:0005886,GO:0004672,GO:0005524,GO:0016021	Solyc06g051030.2.1	Receptor like kinase, RLK
TR19369_c0_g1	9.082	9.386	0.192	0	1.13754e-08	2.63661e-06	Upregulated	EXLB1_ARATH	Full=Expansin-like B1	GO:0019953,GO:0005576	Solyc06g060970.1.1	Expansin-like protein IPR007112 Expansin 45, endoglucanase-like
TR33256_c0_g1	17.035	9.379	108.63	100.792	7.48614e-06	0.000409437	Downregulated	PCR2_ARATH	Full=Protein PLANT CADMIUM RESISTANCE 2	GO:0016021,GO:0006979,GO:0005886	Solyc01g005470.2.1	Cell number regulator 10 IPR006461 Protein of unknown function Cys-rich
TR24953_c0_g1	10.53	9.372	1.043	0	1.0899e-05	0.000541608	Upregulated	CYB5_ORYSJ	Full=Cytochrome b5	GO:0020037,GO:0005789,GO:0046872,GO:0016021,GO:0055114	Solyc06g083440.2.1	Cytochrome b5 reductase IPR001199 Cytochrome b5
TR45868_c0_g1	5.547	9.304	147.67	141.05	6.74676e-09	1.91283e-06	Downregulated	WRK41_ARATH	Full=Probable WRKY transcription factor 41	GO:0005634,GO:0003700,GO:0006351,GO:0043565	Solyc08g008280.2.1	WRKY transcription factor-30 IPR003657 DNA-binding WRKY
TR36995_c0_g1	10.186	9.291	1.733	0	0.000413233	0.00850959	Upregulated	0	0	0	0	0
TR15332_c0_g1	0	9.223	63.31	51.015	1.87406e-05	0.000808545	Downregulated	0	0	0	Solyc02g036480.1.1	Harpin-induced protein-like (Fragment) IPR010847 Harpin-induced 1
TR6397_c0_g3	28.866	9.203	117.073	117.776	0.000122306	0.00334515	Downregulated	PCR2_ARATH	Full=Protein PLANT CADMIUM RESISTANCE 2	GO:0016021,GO:0006979,GO:0005886	Solyc04g007900.2.1	Cell number regulator 2 IPR006461 Protein of unknown function Cys-rich
TR19035_c0_g1	2.651	9.182	0.299	0.235	1.5617e-07	1.9996e-05	Upregulated	SCL32_ARATH	Full=Scarecrow-like protein 32	GO:0006355,GO:0006351,GO:0005634,GO:0003700	Solyc07g052960.1.1	GRAS family transcription factor IPR005202 GRAS transcription factor
TR47824_c0_g1	7.683	9.026	0.107	0	2.16434e-06	0.000157269	Upregulated	0	0	0	0	0
TR46458_c0_g1	36.328	9.006	219.868	219.601	5.80871e-06	0.000340942	Downregulated	G2OX2_PEA	Full=Gibberellin 2-beta-dioxygenase 2	GO:0005506,GO:0045543,GO:0009686	Solyc01g079200.2.1	Gibberellin 2-oxidase IPR005123 Oxoglutarate and iron-dependent oxygenase
TR30757_c0_g1	8.517	9.006	57.245	55.621	0.000181557	0.00456464	Downregulated	SWET2_ARATH	Full=Bidirectional sugar transporter SWEET2	GO:0005887,GO:0051119,GO:0034219	Solyc02g071520.2.1	RAG1-activating protein 1 homolog IPR018179 RAG1-activating protein 1 homologue
TR37332_c0_g1	6.676	8.999	55.335	63.408	1.24504e-05	0.000596303	Downregulated	PME3_PHAVU	Full=Pectinesterase 3	GO:0005576,GO:0005618,GO:0004857,GO:0030599,GO:0042545,GO:0045490,GO:0045330	Solyc03g123620.2.1	Pectinesterase IPR000070 Pectinesterase, catalytic
TR53184_c0_g1	6.554	8.993	44.837	36.796	0.000358468	0.0076241	Downregulated	ERF08_ARATH	Full=Ethylene-responsive transcription factor ERF008	GO:0006351,GO:0005634,GO:0003677,GO:0003700,GO:0009873	Solyc02g093130.1.1	Ethylene-responsive transcription factor 5 IPR001471 Pathogenesis-related transcriptional factor and ERF, DNA-binding
TR38950_c0_g1	3.412	8.979	34.661	42.421	0.000279248	0.00624453	Downregulated	0	0	0	Solyc10g009210.2.1	Calmodulin-binding protein (Fragment) IPR012416 Calmodulin binding protein-like
TR35325_c0_g1	9.45	8.877	90.886	88.187	8.25622e-07	7.14354e-05	Downregulated	PDX12_ARATH	Full=Pyridoxal 5'-phosphate synthase-like subunit PDX1.2	GO:0042823,GO:0042819,GO:0046982,GO:0003824,GO:0005829	Solyc03g120090.1.1	Pyridoxal biosynthesis lyase pdxS IPR001852 Vitamin B6 biosynthesis protein
TR24692_c0_g1	39.249	8.843	2.078	1.739	9.42334e-05	0.00273268	Upregulated	ZFP7_ARATH	Full=Zinc finger protein 7	GO:0046982,GO:0003700,GO:0044212,GO:0046872,GO:0006355,GO:0005737,GO:0005634	Solyc01g107430.2.1	Zinc finger protein 7 IPR007087 Zinc finger, C2H2-type
TR52677_c0_g2	3.903	8.843	57.122	54.658	1.35313e-05	0.000634671	Downregulated	COX2_ARATH	Full=Cytochrome c oxidase subunit 2	GO:0070469,GO:0022900,GO:0005507,GO:0016021,GO:0005743,GO:0004129	Solyc11g056410.1.1	Cytochrome c oxidase subunit 2 IPR002429 Cytochrome c oxidase subunit II C-terminal
TR6603_c0_g1	0	8.803	45.527	46.698	5.34749e-05	0.00180259	Downregulated	0	0	0	Solyc07g062310.2.1	Os03g0825600 protein (Fragment) IPR006943 Protein of unknown function DUF641, plant
TR69647_c0_g1	139.641	8.762	3.09	3.658	4.66954e-05	0.00161407	Upregulated	BH030_ARATH	Full=Transcription factor bHLH30	GO:0006355,GO:0006351,GO:0005634,GO:0003677,GO:0003700	Solyc02g076920.2.1	Transcription factor MYC2 IPR001092 Basic helix-loop-helix dimerisation region bHLH
TR16959_c0_g1	94.894	8.755	2.684	1.402	3.14697e-05	0.00120837	Upregulated	0	0	0	Solyc04g040110.2.1	Kinesin-like protein IPR001752 Kinesin, motor region
TR3385_c0_g1	7.855	8.755	1.334	0.697	0.000294092	0.00650773	Upregulated	0	0	0	Solyc04g051470.1.1	Unknown Protein
TR9734_c0_g2	5.056	8.755	35.198	35.018	0.000485877	0.00958294	Downregulated	0	0	0	Solyc01g103200.2.1	Unknown Protein
TR24331_c0_g1	15.906	8.721	126.843	139.006	1.62409e-07	2.04649e-05	Downregulated	PLA14_ARATH	Full=Phospholipase A1-Ibeta2, chloroplastic	GO:0047714,GO:0016042,GO:0008970,GO:0004806,GO:0009507	Solyc08g078090.1.1	Lipase (Fragment) IPR002921 Lipase, class 3
TR51860_c0_g2	25.012	8.714	82.259	77.125	0.000267673	0.00604799	Downregulated	CALM1_SOLTU	Full=Calmodulin-1	GO:0005509	Solyc03g098050.2.1	Calmodulin 3 protein IPR011992 EF-Hand type
TR17668_c0_g1	21.576	8.674	221.241	204.936	3.69404e-08	6.5167e-06	Downregulated	0	0	0	Solyc11g010250.1.1	Avr9_Cf-9 rapidly elicited protein 75
TR65114_c0_g2	9.082	8.647	155.806	156.374	2.23181e-09	8.2171e-07	Downregulated	DNJH_CUCSA	Full=DnaJ protein homolog	GO:0005524,GO:0009408,GO:0006457,GO:0005886,GO:0046872	Solyc11g071830.1.1	Chaperone protein dnaj IPR003095 Heat shock protein DnaJ
TR35588_c3_g1	229.969	8.613	5.076	5.781	0.000278438	0.00623082	Upregulated	0	0	0	Solyc02g005360.1.1	Unknown Protein
TR63290_c0_g1	47.717	8.606	129.45	156.272	0.000490982	0.0096262	Downregulated	ALL8_OLEEU	Full=Calcium-binding allergen Ole e 8	GO:0005509	Solyc03g118810.1.1	Calmodulin
TR42596_c2_g1	10.481	8.579	49.377	46.26	0.000238854	0.00556869	Downregulated	0	0	0	0	0
TR34228_c0_g1	6.701	8.572	204.777	206.072	4.85244e-11	5.92632e-08	Downregulated	YLS9_ARATH	Full=Protein YLS9	GO:0009507,GO:0051707,GO:0010150,GO:0051607	Solyc01g009160.2.1	Harpin-induced protein-like (Fragment) IPR010847 Harpin-induced 1
TR66446_c0_g1	8.886	8.552	1.196	0.791	2.91405e-05	0.00113817	Upregulated	G2OX8_ARATH	Full=Gibberellin 2-beta-dioxygenase 8	GO:0046872,GO:0009686,GO:0052635,GO:0009685	Solyc02g080120.1.1	Gibberellin 2-beta-dioxygenase 7 IPR005123 Oxoglutarate and iron-dependent oxygenase
TR32083_c0_g1	5.572	8.552	48.694	45.186	6.14675e-05	0.0020122	Downregulated	TGT2_ARATH	Full=Trihelix transcription factor GT-2	GO:0005634,GO:0003677,GO:0003700,GO:0006351	Solyc11g005380.1.1	GT-2 factor (Fragment) IPR017877 MYB-like
TR37100_c0_g2	779.623	8.545	7.515	10.584	0.000160136	0.00412739	Upregulated	DOX1_ARATH	Full=Alpha-dioxygenase 1	GO:0001561,GO:0009751,GO:0008219,GO:0006979,GO:0012511,GO:0042742,GO:0046872,GO:0004601,GO:0050832,GO:1902609,GO:0071732,GO:0009626,GO:0009627,GO:0071446,GO:0009737,GO:0034614,GO:0016702,GO:0006629,GO:0020037,GO:0031408	Solyc02g087070.2.1	Peroxidase family protein IPR002007 Haem peroxidase, animal
TR54199_c0_g2	8.076	8.274	193.044	198.763	7.40412e-11	8.10726e-08	Downregulated	P2C02_ARATH	Full=Probable protein phosphatase 2C 2	GO:0046872,GO:0004722,GO:0006470	Solyc05g052520.2.1	Protein phosphatase 2C IPR015655 Protein phosphatase 2C
TR9768_c7_g7	21.379	8.233	115.961	135.277	1.40026e-05	0.000653793	Downregulated	TAR1_KLULA	Full=Protein TAR1	GO:0005739	0	0
TR49590_c0_g1	3.657	8.233	69.085	73.13	7.5717e-07	6.79031e-05	Downregulated	CAF1K_ARATH	Full=Probable CCR4-associated factor 1 homolog 11	GO:0006351,GO:0005737,GO:0005634,GO:0006355,GO:0004535,GO:0003723,GO:0000175,GO:0000289,GO:0090305,GO:0042742,GO:0030014,GO:0046872,GO:0090503,GO:0008408	Solyc11g068770.1.1	CCR4-NOT transcription complex subunit 7 IPR006941 Ribonuclease CAF1
TR58418_c0_g1	8.468	8.226	123.116	125.476	1.94289e-07	2.35091e-05	Downregulated	0	0	0	Solyc04g077620.1.1	Unknown Protein
TR31268_c0_g1	8.346	8.186	58.287	64.003	1.07489e-05	0.000534988	Downregulated	0	0	0	Solyc09g098290.2.1	Receptor like kinase, RLK
TR14036_c0_g1	7.879	8.186	0.368	0.932	1.63103e-06	0.000124499	Upregulated	1A12_SOLLC	Full=1-aminocyclopropane-1-carboxylate synthase 2	GO:0009693,GO:0009835,GO:0016847,GO:0030170	Solyc01g095080.2.1	1-aminocyclopropane-1-carboxylate synthase IPR004839 Aminotransferase, class I and II IPR004838 Aminotransferases, class-I, pyridoxal-phosphate-binding site
TR8783_c0_g1	9.966	8.179	72.06	71.814	1.52329e-06	0.000117404	Downregulated	CLV1_ARATH	Full=Receptor protein kinase CLAVATA1	GO:0004674,GO:0005886,GO:0005524,GO:0016021	Solyc11g017270.1.1	Receptor like kinase, RLK
TR35857_c0_g1	29.7	8.172	80.702	90.764	0.000162032	0.00416017	Downregulated	ELC_ARATH	Full=Protein ELC	GO:0006464,GO:0005770,GO:0043130,GO:0010091,GO:0015031,GO:0043234,GO:0051301,GO:0005769,GO:0000813	Solyc10g085590.1.1	Tumor susceptibility protein 101 (Fragment) IPR008883 Tumour susceptibility gene 101
TR30624_c0_g1	0	8.145	45.964	36.303	5.49221e-05	0.00184355	Downregulated	GRXC9_ARATH	Full=Glutaredoxin-C9	GO:0005737,GO:0009867,GO:0009863,GO:0005634,GO:0009055,GO:0009751,GO:0045454,GO:0015035	Solyc07g053550.1.1	Glutaredoxin IPR011905 Glutaredoxin-like, plant II
TR46473_c0_g2	6.897	8.131	89.406	81.457	3.1514e-07	3.51121e-05	Downregulated	WRK33_ARATH	Full=Probable WRKY transcription factor 33	GO:0009408,GO:0043565,GO:0006970,GO:0042742,GO:0034605,GO:0010120,GO:0010200,GO:0010508,GO:0009651,GO:0006351,GO:0009414,GO:0005634,GO:0050832,GO:0044212,GO:0070370,GO:0009409,GO:0003700	Solyc09g014990.2.1	WRKY-like transcription factor IPR003657 DNA-binding WRKY
TR42599_c1_g1	0	8.124	36.509	40.086	7.87557e-05	0.00241162	Downregulated	0	0	0	Solyc10g009210.2.1	Calmodulin-binding protein (Fragment) IPR012416 Calmodulin binding protein-like
TR24386_c0_g1	6.087	8.043	54.039	58.097	1.09441e-05	0.000542999	Downregulated	TGT_XENTR	Full=Queuine tRNA-ribosyltransferase	GO:0008479,GO:0046872,GO:0008616	Solyc04g074710.2.1	Queuine tRNA-ribosyltransferase IPR004803 Queuine tRNA-ribosyltransferase
TR24293_c0_g1	2.725	8.036	36.387	36.522	0.000120677	0.00330568	Downregulated	ACR8_ARATH	Full=ACT domain-containing protein ACR8 {ECO:0000305}	GO:0008152,GO:0016597,GO:0009737	Solyc08g079650.2.1	ACT domain containing protein expressed IPR002912 Amino acid-binding ACT
TR2503_c1_g5	11.389	7.996	76.216	75.308	3.45832e-06	0.000225032	Downregulated	RT04_ARATH	Full=Ribosomal protein S4, mitochondrial	GO:0005840,GO:0019843,GO:0005739	Solyc00g021640.2.1	Ribosomal protein S4 IPR002942 RNA-binding S4
TR40693_c0_g1	11.659	7.962	0.989	1.034	1.72365e-05	0.000762023	Upregulated	PER5_VITVI	Full=Peroxidase 5 {ECO:0000250|UniProtKB:P22195}	GO:0006979,GO:0005576,GO:0020037,GO:0004601,GO:0046872,GO:0042744	Solyc12g017870.1.1	Peroxidase 1 IPR002016 Haem peroxidase, plant_fungal_bacterial
TR12244_c0_g2	11.659	7.962	1.319	1.723	0.000291142	0.00646927	Upregulated	RNHX1_ARATH	Full=Putative ribonuclease H protein At1g65750	GO:0003676,GO:0046872,GO:0004523	Solyc01g057740.1.1	RNase H family protein
TR35831_c0_g1	10.555	7.955	55.611	66.181	1.87234e-05	0.000808545	Downregulated	PME_PRUPE	Full=Pectinesterase PPE8B	GO:0045490,GO:0045330,GO:0005576,GO:0004857,GO:0042545,GO:0030599,GO:0005618	Solyc07g017600.2.1	Pectinesterase IPR000070 Pectinesterase, catalytic
TR51919_c0_g1	0	7.955	85.763	85.296	2.12149e-07	2.50431e-05	Downregulated	0	0	0	Solyc03g116030.2.1	E3 ubiquitin-protein ligase MARCH3 IPR011016 Zinc finger, RING-CH-type
TR39777_c0_g1	10.309	7.941	57.843	52.55	3.63828e-05	0.0013544	Downregulated	E70A1_ARATH	Full=Exocyst complex component EXO70A1	GO:0000145,GO:0005576,GO:0005886,GO:0005856,GO:0005618,GO:0005829,GO:0009524,GO:0006887	Solyc06g075610.1.1	Exocyst complex component 7 IPR004140 Exo70 exocyst complex subunit
TR3748_c0_g1	11.635	7.894	0.659	0	2.26649e-06	0.000162461	Upregulated	0	0	0	0	0
TR37109_c3_g2	15.587	7.887	64.76	53.091	0.000267758	0.00604799	Downregulated	XTH15_ARATH	Full=Xyloglucan endotransglucosylase/hydrolase protein 15 {ECO:0000303|PubMed:12514239}	GO:0010411,GO:0005618,GO:0048046,GO:0071555,GO:0042546,GO:0033946,GO:0016762	Solyc07g055990.2.1	Xyloglucan endotransglucosylase_hydrolase 7 IPR016455 Xyloglucan endotransglucosylase_hydrolase
TR653_c1_g1	4.713	7.813	34.385	36.342	0.000408469	0.00844825	Downregulated	CML1_ARATH	Full=Calmodulin-like protein 1	GO:0005509,GO:0005739	Solyc01g108190.2.1	Calmodulin-like protein IPR011992 EF-Hand type
TR48583_c0_g2	0	7.772	40.635	42.695	5.11852e-05	0.00174955	Downregulated	ORP3C_ARATH	Full=Oxysterol-binding protein-related protein 3C	GO:0005829,GO:0006869,GO:0008289	Solyc10g084800.1.1	Oxysterol-binding protein IPR000648 Oxysterol-binding protein
TR61344_c1_g1	52.872	7.765	219.27	216.907	9.10387e-05	0.00267685	Downregulated	PUB23_ARATH	Full=E3 ubiquitin-protein ligase PUB23	0,GO:0016567,GO:0004842,GO:0005829,GO:0010200,GO:0009414,GO:0016874,GO:0051865,GO:0006952	Solyc01g007000.2.1	U-box domain-containing protein IPR003613 U box domain
TR8318_c1_g1	14.678	7.738	70.841	69.754	4.08867e-05	0.00147536	Downregulated	ERF3_TOBAC	Full=Ethylene-responsive transcription factor 3	GO:0003700,GO:0003677,GO:0005634,GO:0006351,GO:0006952,GO:0009873	Solyc10g006130.1.1	Ethylene responsive transcription factor 3a IPR001471 Pathogenesis-related transcriptional factor and ERF, DNA-binding
TR36888_c0_g3	14.948	7.67	186.978	171.235	9.0747e-09	2.28697e-06	Downregulated	CML31_ORYSJ	Full=Probable calcium-binding protein CML31	0,GO:0005509	Solyc11g071740.1.1	Calmodulin-like protein IPR011992 EF-Hand type
TR18221_c0_g1	4.786	7.657	1.419	0.423	0.000109037	0.0030542	Upregulated	AB5G_ARATH	Full=ABC transporter G family member 5	GO:0006810,GO:0005524,GO:0016887,GO:0016021	Solyc05g056470.1.1	ABC transporter G family member 5 IPR013525 ABC-2 type transporter
TR45898_c0_g1	0	7.643	119.803	111.548	1.33342e-08	2.928e-06	Downregulated	YP20_BACLI	Full=Uncharacterized N-acetyltransferase p20	GO:0008080	Solyc09g082230.1.1	Ribosomal-protein-alanine N-acetyltransferase IPR000182 GCN5-related N-acetyltransferase
TR2354_c0_g1	0	7.643	0.115	0	2.51278e-05	0.0010147	Upregulated	0	0	0	Solyc07g064380.2.1	Serine_threonine-protein phosphatase 7 long form homolog IPR019557 Aminotransferase-like, plant mobile domain
TR37127_c0_g1	7.707	7.609	38.549	38.974	0.000303057	0.00667714	Downregulated	Y5102_ARATH	Full=Serine/threonine-protein kinase At5g01020	GO:0004674,GO:0005524,GO:0005886	Solyc07g041940.2.1	ATP binding _ serine-threonine kinase IPR002290 Serine_threonine protein kinase
TR43872_c0_g1	6.75	7.582	61.278	57.948	1.59516e-06	0.000122646	Downregulated	HEM11_CUCSA	Full=Glutamyl-tRNA reductase 1, chloroplastic	GO:0009507,GO:0008883,GO:0050661,GO:0006782,GO:0015995	Solyc01g106390.2.1	Glutamyl-tRNA reductase IPR000343 Tetrapyrrole biosynthesis, glutamyl-tRNA reductase
TR16975_c0_g3	0	7.575	24.01	36.005	0.000477801	0.00947072	Downregulated	WRK75_ARATH	Full=Probable WRKY transcription factor 75	GO:0032107,GO:0043620,GO:0010055,GO:0044212,GO:0006351,GO:0048527,GO:0005634,GO:0001046,GO:0000122,GO:0003700	Solyc05g015850.2.1	WRKY transcription factor-b IPR003657 DNA-binding WRKY
TR64442_c0_g1	0	7.568	40.451	33.576	2.20305e-05	0.000908934	Downregulated	Y769_MYCTU	Full=Uncharacterized oxidoreductase Rv0769	GO:0004316,GO:0051287,GO:0050661,GO:0030497	Solyc10g080900.1.1	3-oxoacyl-reductase IPR002347 Glucose_ribitol dehydrogenase
TR68101_c0_g1	27	7.521	103.217	102.335	0.000109606	0.00306105	Downregulated	ERF4_NICSY	Full=Ethylene-responsive transcription factor 4	GO:0005634,GO:0003677,GO:0003700,GO:0006952,GO:0009873,GO:0006351	Solyc07g053740.1.1	Ethylene-responsive transcription factor 4 IPR001471 Pathogenesis-related transcriptional factor and ERF, DNA-binding
TR31447_c0_g1	4.296	7.487	42.115	40.455	7.26635e-05	0.00227804	Downregulated	0	0	0	Solyc12g096570.1.1	ARGOS
TR60551_c0_g1	5.916	7.419	38.066	35.127	0.000471614	0.00936563	Downregulated	0	0	0	Solyc10g074820.1.1	Unknown Protein IPR010605 Protein of unknown function DUF1191
TR47658_c0_g2	2.995	7.392	73.003	72.48	1.62274e-07	2.04649e-05	Downregulated	NPK1_TOBAC	Full=Mitogen-activated protein kinase kinase kinase NPK1	GO:0005856,GO:0005634,GO:0005524,GO:0004709,GO:0009524,GO:0006952,GO:0000919	Solyc03g117640.1.1	Serine_threonine-protein kinase 3 IPR002290 Serine_threonine protein kinase
TR60486_c0_g1	24.202	7.365	1.304	1.293	0.000130438	0.0035012	Upregulated	0	0	0	Solyc00g097960.1.1	Unknown Protein
TR35576_c0_g1	0	7.345	43.579	38.41	5.16859e-05	0.00176098	Downregulated	PERX_NICSY	Full=Lignin-forming anionic peroxidase	GO:0020037,GO:0006979,GO:0046872,GO:0042744,GO:0005576,GO:0004601	Solyc11g018800.1.1	Peroxidase 2 IPR002016 Haem peroxidase, plant_fungal_bacterial
TR10237_c0_g1	26.19	7.338	273.946	258.395	1.66771e-08	3.43873e-06	Downregulated	P2B15_ARATH	Full=F-box protein PP2-B15	GO:0030246	Solyc01g100010.2.1	F-box protein PP2-B1 IPR001810 Cyclin-like F-box
TR2664_c0_g1	297.396	7.331	6.671	3.439	0.00015636	0.00404651	Upregulated	Y5158_ARATH	Full=Probable receptor-like protein kinase At5g15080	GO:0004674,GO:0005886,GO:0016021,GO:0005524	Solyc05g007050.2.1	ATP binding _ serine-threonine kinase IPR002290 Serine_threonine protein kinase
TR31046_c0_g1	64.334	7.324	4.425	2.953	0.000414723	0.00852371	Upregulated	GP1_SOLLC	Full=Polygalacturonase-1 non-catalytic subunit beta	GO:0009835,GO:0005618,GO:0071555,GO:0048046	Solyc03g114240.2.1	BURP domain-containing protein (Fragment) IPR004873 BURP
TR2263_c0_g1	5.474	7.311	91.607	95.606	2.86666e-08	5.23149e-06	Downregulated	GH31_ARATH	Full=Probable indole-3-acetic acid-amido synthetase GH3.1	GO:0009733,GO:0016874	Solyc01g107390.2.1	Auxin-responsive GH3 product IPR004993 GH3 auxin-responsive promoter
TR7898_c0_g1	50.515	7.29	1.143	1.794	8.15136e-05	0.00246278	Upregulated	ATL48_ARATH	Full=RING-H2 finger protein ATL48	GO:0016021,GO:0016567,GO:0008270	Solyc03g114190.1.1	RING finger protein IPR018957 Zinc finger, C3HC4 RING-type
TR3388_c0_g1	289.935	7.229	6.196	3.298	0.000171873	0.00436961	Upregulated	0	0	0	Solyc01g106560.2.1	AT4g33690_T16L1_180 (Fragment)
TR46452_c0_g1	0	7.223	27.576	25.946	0.000406277	0.00842097	Downregulated	EDR2L_ARATH	Full=Protein ENHANCED DISEASE RESISTANCE 2-like	GO:0006952,GO:0010008,GO:0008289,GO:0016021,GO:0005886,GO:0005789	Solyc08g068880.1.1	Os10g0479800 protein (Fragment) IPR009769 Protein of unknown function DUF1336
TR4215_c0_g1	17.771	7.195	0.629	0	7.50433e-06	0.000409437	Upregulated	BLT_ARATH	Full=Protein BRANCHLESS TRICHOME	GO:0010090,GO:0010091	Solyc08g083220.1.1	Unknown Protein
TR6579_c0_g1	10.088	7.175	131.835	112.684	1.53191e-07	1.96941e-05	Downregulated	0	0	0	Solyc08g077020.1.1	Unknown Protein
TR41329_c0_g1	5.007	7.134	43.441	39.342	3.63208e-05	0.00135368	Downregulated	RTNLP_ARATH	Full=Reticulon-like protein B16	GO:0016021,GO:0005789	Solyc06g049060.2.1	Reticulon IPR003388 Reticulon
TR8301_c0_g1	7.732	7.121	1.572	1.849	7.26221e-05	0.00227804	Upregulated	Y4265_ARATH	Full=Probable LRR receptor-like serine/threonine-protein kinase At4g26540	GO:0004674,GO:0005886,GO:0005524,GO:0016021	Solyc07g065860.2.1	Receptor like kinase, RLK
TR31183_c0_g1	124.619	7.107	5.912	4.277	0.000471127	0.00936181	Upregulated	PFKA3_ARATH	Full=ATP-dependent 6-phosphofructokinase 3 {ECO:0000255|HAMAP-Rule:MF_03186}	GO:0006096,GO:0046872,GO:0046835,GO:0010053,GO:0005524,GO:0006002,GO:0003872,GO:0005829	Solyc07g045160.2.1	Phosphofructokinase family protein IPR012004 Pyrophosphate-dependent phosphofructokinase TP0108
TR30759_c0_g1	7.585	7.1	55.243	53.341	3.32507e-05	0.00126146	Downregulated	WRK70_ARATH	Full=Probable WRKY transcription factor 70	GO:0009753,GO:1900056,GO:0050832,GO:0009751,GO:0045892,GO:0042742,GO:0031347,GO:0009862,GO:0009864,GO:0043565,GO:0006351,GO:0010200,GO:0005634,GO:0003700	Solyc03g095770.2.1	WRKY transcription factor 6 IPR003657 DNA-binding WRKY
TR34912_c0_g1	0	7.046	39.684	41.222	4.15944e-05	0.0014857	Downregulated	AGO2_ARATH	Full=Protein argonaute 2	GO:0042742,GO:0051607,GO:0035197,GO:0006417,GO:0006355,GO:0019048,GO:0006351,GO:0031047,GO:0030529	Solyc02g069260.2.1	ARGONAUTE 1 IPR003165 Stem cell self-renewal protein Piwi
TR21188_c0_g1	128.939	7.026	2.101	0	7.23816e-05	0.00227804	Upregulated	0	0	0	0	0
TR18218_c0_g1	2.995	7.026	39.607	36.906	4.59283e-05	0.00159884	Downregulated	0	0	0	Solyc07g062310.2.1	Os03g0825600 protein (Fragment) IPR006943 Protein of unknown function DUF641, plant
TR10357_c0_g1	6.038	6.992	112.764	115.629	7.6475e-09	2.05311e-06	Downregulated	CIPKB_ARATH	Full=CBL-interacting serine/threonine-protein kinase 11	GO:0009268,GO:0007165,GO:0004672,GO:0006468,GO:0005524,GO:0004674	Solyc06g082440.1.1	CBL-interacting protein kinase 16 IPR002290 Serine_threonine protein kinase
TR42685_c0_g1	22.238	6.978	101.56	103.095	2.57365e-05	0.00103263	Downregulated	ATL2_ARATH	Full=RING-H2 finger protein ATL2	GO:0016021,GO:0010200,GO:0008270,GO:0006952,GO:0016567	Solyc01g066430.2.1	Ring H2 finger protein IPR018957 Zinc finger, C3HC4 RING-type
TR4733_c1_g1	8.714	6.965	70.189	74.211	9.54413e-07	8.03884e-05	Downregulated	KATAM_ARATH	Full=Xyloglucan galactosyltransferase KATAMARI1	GO:0005794,GO:0006486,GO:0005802,GO:0009863,GO:0032580,GO:0009826,GO:0005768,GO:0009969,GO:0010256,GO:0016757,GO:0030173,GO:0042353	Solyc07g044960.1.1	Galactosyltransferase-like protein (Fragment) IPR004263 Exostosin-like
TR66938_c1_g3	0	6.944	48.487	45.797	1.30856e-05	0.000620179	Downregulated	CSLD3_ARATH	Full=Cellulose synthase-like protein D3	GO:0005783,GO:0005768,GO:0005794,GO:0051753,GO:0071555,GO:0000139,GO:0030244,GO:0016760,GO:0005886,GO:0005802,GO:0009409,GO:0016021,GO:0097502	Solyc08g076320.2.1	Cellulose synthase-like protein IPR005150 Cellulose synthase
TR47724_c2_g1	0	6.917	24.148	30.646	0.000170033	0.00433673	Downregulated	DRL23_ARATH	Full=Putative disease resistance protein At4g10780	GO:0043531,GO:0006952,GO:0005524	Solyc10g076440.1.1	Cc-nbs-lrr, resistance protein
TR31081_c0_g1	0	6.911	32.299	27.999	0.000185998	0.00462143	Downregulated	0	0	0	Solyc00g013190.1.1	Unknown Protein
TR54188_c1_g1	15.047	6.822	160.906	156.679	6.16982e-09	1.78106e-06	Downregulated	TM53B_XENLA	Full=Transmembrane protein 53-B	GO:0016021	Solyc02g020890.2.1	Transmembrane protein 53 IPR008547 Protein of unknown function DUF829, transmembrane 53
TR54146_c0_g1	4.075	6.822	194.018	201.834	1.04553e-11	2.16043e-08	Downregulated	ALL8_OLEEU	Full=Calcium-binding allergen Ole e 8	GO:0005509	Solyc06g068960.1.1	Calmodulin IPR011992 EF-Hand type
TR19684_c0_g1	0	6.816	59.499	41.16	9.63055e-06	0.000494836	Downregulated	0	0	0	Solyc12g007050.1.1	Unknown Protein IPR009424 Protein of unknown function DUF1070
TR2677_c1_g1	48.895	6.788	2.37	0	0.000260702	0.00592579	Upregulated	0	0	0	0	0
TR9777_c0_g1	2.086	6.768	94.582	72.394	1.43982e-08	3.06741e-06	Downregulated	0	0	0	Solyc09g015040.1.1	Os08g0119500 protein (Fragment)
TR6587_c0_g2	5.449	6.714	0.959	0.815	1.58147e-05	0.000714338	Upregulated	C7A22_PANGI	Full=Cytochrome P450 CYP749A22	GO:0005506,GO:0004497,GO:0020037,GO:0016021,GO:0016705	Solyc05g011970.2.1	Cytochrome P450
TR30721_c0_g1	3.535	6.714	202.975	187.373	6.05076e-12	1.60113e-08	Downregulated	RAP23_ARATH	Full=Ethylene-responsive transcription factor RAP2-3	GO:0051707,GO:0003677,GO:0003700,GO:0045893,GO:0010286,GO:0009873,GO:0005737,GO:0005634,GO:0009753,GO:0005886,GO:0006351,GO:0009723,GO:0009735,GO:0008219	Solyc09g075420.2.1	Ethylene responsive transcription factor 2b IPR001471 Pathogenesis-related transcriptional factor and ERF, DNA-binding IPR001711 Phospholipase C, phosphatidylinositol-specific, Y domain
TR35351_c0_g2	4.345	6.687	60.634	56.185	2.67855e-06	0.000183929	Downregulated	GEML8_ARATH	Full=Putative GEM-like protein 8	0	Solyc03g098660.2.1	FIP1 IPR004182 GRAM
TR964_c0_g1	3.878	6.687	93.838	81.653	4.03423e-08	6.85042e-06	Downregulated	SKI27_ARATH	Full=F-box protein SKIP27	GO:0005634,GO:0016567	Solyc10g005480.2.1	F-box family protein IPR001810 Cyclin-like F-box
TR42133_c0_g1	17.673	6.619	0.905	0	9.62799e-05	0.0027743	Upregulated	0	0	0	0	0
TR36860_c1_g1	4.099	6.619	30.643	35.159	0.000188343	0.00465572	Downregulated	CHI3_TOBAC	Full=Endochitinase 3	GO:0004568,GO:0000272,GO:0006032,GO:0016998,GO:0008061,GO:0005773,GO:0006952	Solyc10g055810.1.1	Endochitinase (Chitinase) IPR016283 Glycoside hydrolase, family 19 IPR018371 Chitin-binding, type 1, conserved site IPR000726 Glycoside hydrolase, family 19, catalytic IPR001002 Chitin-binding, type 1
TR21358_c2_g1	22.508	6.599	1.396	0.666	8.71504e-05	0.00258875	Upregulated	G2OX3_ARATH	Full=Gibberellin 2-beta-dioxygenase 3	GO:0005506,GO:0045543,GO:0009686	Solyc02g070430.2.1	Gibberellin 2-oxidase 1 IPR005123 Oxoglutarate and iron-dependent oxygenase
TR47745_c1_g1	22.091	6.599	167.685	158.105	4.09711e-07	4.22204e-05	Downregulated	WRK53_ARATH	Full=Probable WRKY transcription factor 53	GO:0003677,GO:0045893,GO:0009507,GO:0003700,GO:0006351,GO:0005634,GO:0031347,GO:0010200,GO:0009816,GO:0043565,GO:0009751,GO:0010193,GO:0010150,GO:0042542	Solyc01g095630.2.1	WRKY transcription factor IPR003657 DNA-binding WRKY
TR12950_c0_g1	298.575	6.592	5.314	7.098	0.000311223	0.00681558	Upregulated	ARG7_VIGRR	Full=Indole-3-acetic acid-induced protein ARG7	GO:0009733	Solyc06g072650.1.1	Auxin responsive SAUR protein IPR003676 Auxin responsive SAUR protein
TR51762_c0_g1	5.425	6.585	205.497	186.307	4.80265e-11	5.92632e-08	Downregulated	0	0	0	Solyc01g109250.2.1	TMV response-related protein
TR23859_c0_g1	8.542	6.517	199.478	197.439	2.10092e-10	1.5218e-07	Downregulated	BH025_ARATH	Full=Transcription factor bHLH25	GO:0003700,GO:0006355,GO:0006351,GO:0005634,GO:0003677	Solyc02g091810.1.1	Transcription factor IPR011598 Helix-loop-helix DNA-binding
TR32117_c0_g1	7.756	6.456	41.087	39.326	0.000192626	0.00472693	Downregulated	TPSGD_VITVI	Full=(-)-germacrene D synthase	GO:0005737,GO:0000287,GO:0034004,GO:0016114,GO:0052577	Solyc12g006570.1.1	Germacrene-D synthase IPR005630 Terpene synthase, metal-binding domain
TR41370_c0_g2	23.466	6.449	2.155	1.841	0.000448915	0.00903922	Upregulated	Y3126_ARATH	Full=Uncharacterized protein At3g61260	GO:0005773,GO:0005886,GO:0009506	Solyc03g123590.2.1	Remorin family protein IPR005516 Remorin, C-terminal region
TR49563_c0_g1	17.697	6.449	64.714	59.671	0.000167246	0.00427594	Downregulated	ASPG1_ARATH	Full=Protein ASPARTIC PROTEASE IN GUARD CELL 1	GO:0003677,GO:0005783,GO:0004190,GO:0005576,GO:0009627,GO:0009414,GO:0030163,GO:0009737,GO:0070001	Solyc07g045100.1.1	Aspartic proteinase nepenthesin I IPR001461 Peptidase A1
TR8071_c0_g1	0	6.449	0.276	0	0.000494831	0.00965164	Upregulated	0	0	0	0	0
TR66904_c0_g2	66.789	6.402	1.863	2.162	0.00030756	0.00675172	Upregulated	C81E8_MEDTR	Full=Cytochrome P450 81E8 {ECO:0000303|PubMed:14617078}	GO:0005506,GO:0020037,GO:0004497,GO:0016705,GO:0016021	Solyc04g078340.2.1	Cytochrome P450
TR7341_c0_g2	0	6.395	46.01	43.181	4.8424e-06	0.000291775	Downregulated	Y5262_ARATH	Full=Ankyrin repeat-containing protein At5g02620	GO:0005886,GO:0005783,GO:0016021	Solyc08g014570.2.1	Ankyrin repeat family protein IPR002110 Ankyrin
TR51017_c0_g1	0	6.395	23.772	27.145	0.000327988	0.00708981	Downregulated	BCS1_SCHPO	Full=Probable mitochondrial chaperone bcs1	GO:0016021,GO:0005739,GO:0042623,GO:0005524,GO:0034551,GO:0016226,GO:0005743	Solyc01g096230.2.1	ATPase AAA family protein expressed IPR003959 ATPase, AAA-type, core
TR66382_c1_g1	9.426	6.368	52.459	48.68	3.73486e-05	0.00137583	Downregulated	SF3B2_HUMAN	Full=Splicing factor 3B subunit 2	GO:0000398,GO:0006397,GO:0005681,GO:0005654,GO:0071013,GO:0010467,GO:0016032,GO:0008380,GO:0005689,GO:0044822	Solyc03g006520.2.1	Splicing factor 3b subunit 2 IPR007180 Protein of unknown function DUF382
TR27886_c0_g1	7.83	6.341	83.01	67.537	3.57878e-06	0.000230041	Downregulated	B2_DAUCA	Full=B2 protein	0	Solyc08g008370.2.1	Genomic DNA chromosome 5 P1 clone MJC20 IPR013089 Kelch related
TR37109_c2_g1	12.027	6.232	160.975	154.125	2.61911e-08	5.03189e-06	Downregulated	XTH23_ARATH	Full=Probable xyloglucan endotransglucosylase/hydrolase protein 23	GO:0048046,GO:0009832,GO:0071555,GO:0004553,GO:0005618,GO:0016762,GO:0010411	Solyc03g093080.2.1	Xyloglucan endotransglucosylase_hydrolase 9 IPR016455 Xyloglucan endotransglucosylase_hydrolase
TR66975_c3_g2	0	6.178	0.291	0	0.00018534	0.00461592	Upregulated	0	0	0	0	0
TR17420_c0_g2	0	6.158	0.422	0	0.000450011	0.00904409	Upregulated	0	0	0	0	0
TR55191_c0_g1	8.935	6.151	44.776	47.991	9.49342e-05	0.00274298	Downregulated	0	0	0	Solyc01g081450.2.1	Unknown Protein IPR006031 XYPPX repeat
TR19820_c0_g2	2.823	6.131	32.529	32.628	7.26728e-05	0.00227804	Downregulated	0	0	0	Solyc06g033880.1.1	Unknown Protein
TR62177_c0_g1	16.176	6.124	0.13	0	2.18113e-05	0.000904596	Upregulated	0	0	0	Solyc10g080250.1.1	Unknown Protein
TR18097_c0_g1	24.57	6.104	1.633	0.729	4.14169e-05	0.00148532	Upregulated	0	0	0	0	0
TR36442_c2_g7	0	6.097	31.977	28.939	4.96015e-05	0.0017046	Downregulated	TMVRN_NICGU	Full=TMV resistance protein N	0,GO:0005524,GO:0005737,GO:0043531,GO:0009626,GO:0007165	Solyc05g007850.1.1	Tir-nbs-lrr, resistance protein
TR39762_c1_g1	0	6.015	67.252	61.285	5.08302e-07	4.96634e-05	Downregulated	Y5102_ARATH	Full=Serine/threonine-protein kinase At5g01020	0,GO:0005524,GO:0004674	Solyc12g049360.1.1	Receptor-like protein kinase At3g21340 IPR002290 Serine_threonine protein kinase
TR7707_c0_g1	72.017	5.995	2.147	1.418	0.000459451	0.00919886	Upregulated	IAA13_ARATH	Full=Auxin-responsive protein IAA13	GO:0003700,GO:0005634,GO:0009734,GO:0009733,GO:0006351	Solyc12g096980.1.1	Auxin responsive protein IPR003311 AUX_IAA protein
TR35846_c2_g1	19.121	5.948	0.406	0	3.58448e-05	0.0013375	Upregulated	0	0	0	0	0
TR44272_c0_g2	3.338	5.941	57.252	61.779	4.58114e-07	4.603e-05	Downregulated	0	0	0	Solyc01g106690.2.1	Unknown Protein IPR010410 Protein of unknown function DUF1005
TR34168_c0_g1	0	5.927	61.715	63.338	2.20482e-07	2.59303e-05	Downregulated	P2A12_ARATH	Full=F-box protein PP2-A12	GO:0030246	Solyc12g056410.1.1	F-box protein PP2-B1 IPR001810 Cyclin-like F-box
TR11559_c0_g1	4.075	5.92	48.664	49.996	4.48825e-06	0.000274268	Downregulated	UGDH5_ORYSJ	Full=UDP-glucose 6-dehydrogenase 5	GO:0003979,GO:0006065,GO:0051287	Solyc03g115380.1.1	UDP-glucose dehydrogenase IPR014028 UDP-glucose_GDP-mannose dehydrogenase, dimerisation and substrate-binding
TR25614_c0_g1	0	5.9	53.832	43.33	2.19811e-06	0.000159358	Downregulated	UGDH3_ARATH	Full=UDP-glucose 6-dehydrogenase 3	GO:0005829,GO:0003979,GO:0005975,GO:0005634,GO:0005618,GO:0052546,GO:0051287,GO:0006065	Solyc03g115380.1.1	UDP-glucose dehydrogenase IPR014028 UDP-glucose_GDP-mannose dehydrogenase, dimerisation and substrate-binding
TR2272_c0_g1	0	5.887	50.32	55.629	1.01472e-06	8.37167e-05	Downregulated	BOR2_ARATH	Full=Probable boron transporter 2	GO:0005887,GO:0005452,GO:0080139,GO:0051453,GO:0048364,GO:0035445,GO:0005886	Solyc01g057770.2.1	AE family transporter anion exchange IPR003020 Bicarbonate transporter, eukaryotic
TR19402_c0_g1	0	5.798	22.246	21.998	0.000347984	0.00743599	Downregulated	Y2349_ARATH	Full=Uncharacterized protein At2g33490	GO:0005886	Solyc01g009820.2.1	Hydroxyproline-rich glycoprotein family protein
TR31203_c0_g3	10.211	5.792	0.936	0.909	0.000242229	0.00561918	Upregulated	WEB1_ARATH	Full=Protein WEAK CHLOROPLAST MOVEMENT UNDER BLUE LIGHT 1	GO:0009903,GO:0009904,GO:0005886,GO:0005829	Solyc07g022910.2.1	Myosin heavy chain-like IPR008545 Protein of unknown function DUF827, plant
TR37440_c0_g1	13.451	5.778	1.518	1.191	0.00049347	0.00963694	Upregulated	OCT4_ARATH	Full=Organic cation/carnitine transporter 4	GO:0005524,GO:0055085,GO:0042631,GO:0022891,GO:0016021,GO:0009705,GO:0009535,GO:0006811	Solyc07g063920.2.1	Solute carrier family 22 member 6 IPR016196 Major facilitator superfamily, general substrate transporter
TR37424_c0_g1	8.026	5.771	82.213	102.319	9.0697e-07	7.74191e-05	Downregulated	ARG7_VIGRR	Full=Indole-3-acetic acid-induced protein ARG7	GO:0009733	Solyc03g082530.1.1	Auxin-responsive family protein IPR003676 Auxin responsive SAUR protein
TR22011_c1_g2	15.488	5.744	72.29	72.018	6.31654e-05	0.00205087	Downregulated	PUB21_ARATH	Full=U-box domain-containing protein 21	GO:0016874,GO:0004842,GO:0010200	Solyc04g008100.1.1	U-box domain-containing protein IPR003613 U box domain
TR46504_c0_g1	6.652	5.731	0.767	1.379	0.000315854	0.00689796	Upregulated	HAT2_ENCCU	Full=Histone acetyltransferase type B subunit 2	GO:0005737,GO:0016568,GO:0005634	Solyc11g045510.1.1	Homology to unknown gene IPR017986 WD40 repeat, region
TR21310_c1_g1	0	5.71	48.779	59.75	1.03344e-06	8.50154e-05	Downregulated	0	0	0	Solyc01g006400.2.1	Cysteine-rich extensin-like protein-4
TR71497_c0_g1	10.8	5.683	65.373	51.728	0.000109168	0.0030542	Downregulated	Y1500_ARATH	Full=Probable tyrosine-protein phosphatase At1g05000	GO:0004725	Solyc04g056340.2.1	Tyrosine phosphatase family protein IPR020428 Protein-tyrosine phosphatase, dual specificity phosphatase, eukaryotic
TR6585_c0_g2	0	5.636	32.23	27.137	3.96348e-05	0.00143836	Downregulated	GLPT5_ARATH	Full=Putative glycerol-3-phosphate transporter 5	GO:0055085,GO:0055062,GO:0035435,GO:0008643,GO:0006820,GO:0016021,GO:0015315	Solyc12g010440.1.1	Glycerol-3-phosphate transporter IPR016196 Major facilitator superfamily, general substrate transporter
TR8740_c1_g3	0	5.629	93.401	94.219	9.4186e-09	2.33332e-06	Downregulated	RBOHB_SOLTU	Full=Respiratory burst oxidase homolog protein B	GO:0005886,GO:0016174,GO:0005509,GO:0016021,GO:0004601	Solyc01g099620.2.1	Respiratory burst oxidase-like protein IPR013121 Ferric reductase, NAD binding
TR19726_c0_g1	0	5.615	25.359	20.752	0.000324792	0.00705012	Downregulated	ENL3_ARATH	Full=Early nodulin-like protein 3	GO:0009055,GO:0005886,GO:0031225,GO:0009506,GO:0046658	Solyc07g064240.2.1	CT099 (Fragment) IPR003245 Plastocyanin-like
TR34933_c1_g1	5.081	5.595	48.771	48.884	2.4513e-06	0.000171829	Downregulated	PUB8_ARATH	Full=U-box domain-containing protein 8	GO:0008270,GO:0005737,GO:0016567,GO:0004842,GO:0070696,GO:0016874	Solyc02g079740.1.1	U-box domain-containing protein (Fragment) IPR011989 Armadillo-like helical
TR44523_c0_g1	0	5.595	34.4	31.524	2.5081e-05	0.0010147	Downregulated	APK2B_ARATH	Full=Protein kinase 2B, chloroplastic	GO:0005886,GO:0001653,GO:0007178,GO:0005524,GO:0009506,GO:0005737,GO:0005634,GO:0004675,GO:0009536,GO:0009755,GO:0031625,GO:0046777	Solyc01g010660.2.1	Receptor-like protein kinase At3g21340 IPR002290 Serine_threonine protein kinase
TR57029_c0_g2	241.481	5.588	3.804	5.468	0.000180145	0.00453634	Upregulated	0	0	0	Solyc03g098490.1.1	Unknown Protein IPR008480 Protein of unknown function DUF761, plant
TR68743_c0_g1	4.762	5.581	57.206	52.707	3.5128e-06	0.00022718	Downregulated	0	0	0	Solyc02g091180.1.1	cDNA clone J100026I16 full insert sequence
TR25802_c0_g1	0	5.581	27.783	21.81	0.000334985	0.00720672	Downregulated	ERG1_ORYSJ	Full=Elicitor-responsive protein 1	GO:0005544,GO:0005886,GO:0005737	Solyc04g011540.2.1	Elicitor-responsive protein 1 IPR018029 C2 membrane targeting protein
TR4188_c0_g1	19.71	5.575	56.524	67.748	0.000518723	0.00999085	Downregulated	MCPI_SOLLC	Full=Metallocarboxypeptidase inhibitor	GO:0004866	Solyc07g007240.2.1	Metallocarboxypeptidase inhibitor IPR009632 Putative metallocarboxypeptidase inhibitor
TR30904_c0_g1	8.861	5.568	0	0	0.000104849	0.00295944	Upregulated	DCTP1_RAT	Full=dCTP pyrophosphatase 1	GO:0047429,GO:0032556,GO:0009143,GO:0005829,GO:0047840,GO:0000287,GO:0051289	Solyc09g097930.2.1	MazG nucleotide pyrophosphohydrolase IPR004518 NTP pyrophosphohydrolase MazG, putative catalytic core
TR20262_c2_g2	4.786	5.554	31.134	26.988	0.000150215	0.00392587	Downregulated	RLP12_ARATH	Full=Receptor-like protein 12	0,GO:0046777,GO:0009506,GO:0005886,GO:0016021,GO:0004672,GO:0009755	Solyc06g008270.2.1	LRR receptor-like serine_threonine-protein kinase, RLP
TR1899_c2_g1	11.144	5.534	0.805	0.721	8.4313e-05	0.0025186	Upregulated	0	0	0	Solyc01g006690.2.1	Unknown Protein
TR24744_c0_g1	0	5.527	29.96	25.225	8.84512e-05	0.00262248	Downregulated	TF2AA_HUMAN	Full=Transcription initiation factor IIA alpha chain	GO:0046982,GO:0005737,GO:0008134,GO:0005672,GO:0003677,GO:0005654,GO:0006367,GO:0017025,GO:0006366,GO:0006355,GO:0006368,GO:0010467,GO:0016032,GO:0003713	Solyc06g076390.2.1	Transcription initiation factor IIA subunit 1 IPR004855 Transcription factor IIA, alpha_beta subunit
TR31210_c0_g1	4.001	5.52	26.87	24.857	0.000488781	0.00960534	Downregulated	RMA1_CAPAN	Full=E3 ubiquitin-protein ligase RMA1H1	GO:0009414,GO:0005789,GO:0016021,GO:0004842,GO:0009611,GO:0009723,GO:0009409,GO:0006970,GO:0043161,GO:0016567,GO:0008270,GO:0016874	Solyc07g054080.1.1	RING finger protein 5 IPR018957 Zinc finger, C3HC4 RING-type
TR71107_c0_g1	5.228	5.493	76.239	97.705	1.08222e-07	1.48125e-05	Downregulated	0	0	0	Solyc12g057140.1.1	Unknown Protein
TR34188_c0_g1	17.968	5.398	121.628	106.526	5.76764e-08	8.80508e-06	Downregulated	Y1839_ARATH	Full=Probable serine/threonine-protein kinase At1g18390	GO:0007178,GO:0001653,GO:0009506,GO:0005886,GO:0004675,GO:0009755,GO:0005524,GO:0030247,GO:0071215,GO:0042631,GO:0031625,GO:0046777,GO:0048573	Solyc03g083480.2.1	Receptor-like kinase
TR5803_c0_g1	0	5.398	41.302	35.848	1.0385e-05	0.000524019	Downregulated	AROD5_ARATH	Full=Arogenate dehydratase 5, chloroplastic	GO:0047769,GO:0009570,GO:0016597,GO:0009507,GO:0009094,GO:0004664	Solyc06g074530.1.1	Prephenate dehydratase IPR001086 Prephenate dehydratase
TR7304_c0_g2	0	5.385	60.803	60.682	2.67324e-07	3.03164e-05	Downregulated	FB92_ARATH	Full=F-box protein At1g78280	GO:0005829	Solyc04g074490.2.1	Bifunctional arginine demethylase and lysyl-hydroxylase JMJD6 IPR013129 Transcription factor jumonji
TR24405_c0_g1	48.527	5.33	182.055	193.24	0.000258166	0.00588499	Downregulated	CIGR1_ORYSJ	Full=Chitin-inducible gibberellin-responsive protein 1	GO:0006351,GO:0006355,GO:0005634	Solyc12g005340.1.1	GRAS family transcription factor IPR005202 GRAS transcription factor
TR31453_c0_g1	4.32	5.31	43.648	36.953	1.14467e-05	0.000561792	Downregulated	AHL17_ARATH	Full=AT-hook motif nuclear-localized protein 17 {ECO:0000312|EMBL:FAA00288.1}	GO:0006355,GO:0006351,GO:0005634,GO:0003677	Solyc12g087950.1.1	AT-hook motif nuclear localized protein 17 IPR014476 Predicted AT-hook DNA-binding
TR39816_c0_g1	20.938	5.297	621.661	733.07	1.84214e-12	8.35648e-09	Downregulated	0	0	0	0	0
TR54153_c0_g1	0	5.174	18.918	20.133	0.000342448	0.00734239	Downregulated	DOF34_ARATH	Full=Dof zinc finger protein DOF3.4	GO:0009733,GO:0003677,GO:0045787,GO:0006351,GO:0005634,GO:0046872,GO:0044212,GO:0042545,GO:0003700,GO:0009751,GO:0045893	Solyc02g090220.2.1	Dof zinc finger protein IPR003851 Zinc finger, Dof-type
TR56990_c0_g1	8.1	5.168	63.096	61.489	3.12476e-06	0.000207581	Downregulated	PYL4_ARATH	Full=Abscisic acid receptor PYL4	GO:0004864,GO:0005634,GO:0010427,GO:0043086,GO:0009738,GO:0042803,GO:0004872,GO:0005737,GO:0005886	Solyc10g076410.1.1	Abscisic acid receptor PYL4 IPR019587 Polyketide cyclase_dehydrase
TR10269_c0_g2	1.497	5.154	20.268	21.794	0.000211713	0.00511137	Downregulated	0	0	0	Solyc05g018180.2.1	Homology to unknown gene IPR008528 Protein of unknown function DUF810
TR42562_c0_g1	0	5.147	31.295	36.005	9.06437e-06	0.00047031	Downregulated	ARID1_ARATH	Full=AT-rich interactive domain-containing protein 1	GO:0010628,GO:0016575,GO:0048555,GO:0048235,GO:0048556,GO:0006355,GO:0006351,GO:0003677,GO:0000118	Solyc03g115440.1.1	ARID_BRIGHT DNA-binding domain-containing protein_ELM2 domain-containing protein_Myb-like DNA-binding domain-containing protein IPR001005 SANT, DNA-binding
TR54197_c0_g1	5.768	5.134	1.058	0.768	0.000489373	0.0096101	Upregulated	HHT1_ARATH	Full=Omega-hydroxypalmitate O-feruloyl transferase	GO:0010345,GO:0052325,GO:0050734	Solyc04g080720.2.1	Transferase family protein IPR003480 Transferase
TR52763_c0_g2	9.205	5.127	0.583	0.815	0.000108762	0.00305361	Upregulated	21KD_DAUCA	Full=21 kDa protein	GO:0004857,GO:0030599	Solyc11g019910.1.1	Pectinesterase IPR006501 Pectinesterase inhibitor
TR14598_c0_g1	0	5.12	21.855	26.753	0.000371763	0.0078595	Downregulated	0	0	0	0	0
TR35838_c2_g6	0	5.1	48.97	52.002	3.56486e-07	3.8503e-05	Downregulated	RNF5_CAEEL	Full=RING finger protein 5	GO:0061630,GO:0030054,GO:0055120,GO:0055002,GO:0018996,GO:0008270,GO:0042787,GO:0005634,GO:0040039	Solyc02g065540.1.1	RING finger protein 5 IPR018957 Zinc finger, C3HC4 RING-type
TR68133_c0_g2	0	5.1	23.327	24.238	9.73468e-06	0.000499378	Downregulated	CDPKS_ARATH	Full=Calcium-dependent protein kinase 28	GO:0005886,GO:0005737,GO:0005524,GO:0005516,GO:0005509,GO:0004672,GO:0004683,GO:0009738,GO:0018105,GO:0009931,GO:0035556,GO:0046777	Solyc02g083850.2.1	Calcium-dependent protein kinase IPR002290 Serine_threonine protein kinase
TR30523_c0_g1	3.633	5.086	35.029	32.628	3.5659e-05	0.00133371	Downregulated	0	0	0	Solyc05g014120.1.1	Os08g0119500 protein (Fragment) IPR013216 Methyltransferase type 11
TR35914_c0_g1	3.485	5.079	45.098	47.693	4.53519e-06	0.000275728	Downregulated	BH055_ARATH	Full=Transcription factor bHLH55	GO:0005634,GO:0003677,GO:0006351,GO:0006355	Solyc06g035490.2.1	BHLH transcription factor-like IPR011598 Helix-loop-helix DNA-binding
TR36475_c2_g1	3.068	5.079	21.824	27.959	0.00023677	0.00552824	Downregulated	HST_TOBAC	Full=Shikimate O-hydroxycinnamoyltransferase	GO:0047172	Solyc07g005760.2.1	Hydroxycinnamoyl CoA shikimate_quinate hydroxycinnamoyltransferase IPR003480 Transferase
TR71821_c0_g1	13.623	5.059	0.291	0	1.04271e-05	0.000524727	Upregulated	LTPG2_ARATH	Full=Non-specific lipid transfer protein GPI-anchored 2	GO:0031225,GO:0046658,GO:0042335,GO:0008289,GO:0006869,GO:0005886	Solyc06g054060.1.1	Non-specific lipid-transfer protein IPR003612 Plant lipid transfer protein_seed storage_trypsin-alpha amylase inhibitor
TR49889_c0_g1	424.126	5.039	5.468	8.531	0.000432095	0.00878971	Upregulated	PLP3_ARATH	Full=Patatin-like protein 3	GO:0006952,GO:0005737,GO:0004620,GO:0009737,GO:0016042,GO:0047372	Solyc02g065090.2.1	Patatin-like protein 3 IPR002641 Patatin
TR34094_c0_g2	19.097	5.032	69.79	70.365	0.000131993	0.00353399	Downregulated	0	0	0	Solyc03g116510.1.1	Unknown Protein
TR57225_c0_g2	12.96	5.025	83.271	61.489	1.77766e-05	0.000778592	Downregulated	GATA8_ARATH	Full=GATA transcription factor 8	GO:0007623,GO:0008270,GO:0006351,GO:0005634,GO:0003700,GO:0043565,GO:0009845,GO:0045893	Solyc04g015360.2.1	GATA transcription factor 9 IPR000679 Zinc finger, GATA-type
TR23887_c0_g1	4.688	5.025	52.95	66.51	2.83955e-06	0.000192254	Downregulated	B120_ARATH	Full=G-type lectin S-receptor-like serine/threonine-protein kinase B120	GO:0001653,GO:0004674,GO:0005886,GO:0005524,GO:0030246,GO:0016021,GO:0007178,GO:0009755,GO:0009506,GO:0046777,GO:0031625,GO:0005516,GO:0004675,GO:0048544	Solyc02g079570.2.1	Serine_threonine-protein kinase receptor IPR002290 Serine_threonine protein kinase
TR32348_c0_g3	7.315	4.985	0	0	4.55309e-05	0.00158878	Upregulated	0	0	0	Solyc02g089850.2.1	Coiled-coil domain-containing protein 109A IPR006769 Protein of unknown function DUF607
TR37151_c1_g4	5.596	4.985	124.305	123.338	1.16288e-10	1.05503e-07	Downregulated	ABAH1_ARATH	Full=Abscisic acid 8'-hydroxylase 1	0,GO:0005506,GO:0020037,GO:0016021,GO:0010295,GO:0046345	Solyc08g075320.2.1	Cytochrome P450
TR47672_c5_g1	100.441	4.971	1.948	1.911	0.000223589	0.00530631	Upregulated	0	0	0	0	0
TR37284_c0_g1	3.117	4.964	34.155	30.012	2.54597e-05	0.0010257	Downregulated	0	0	0	0	0
TR40721_c0_g1	0	4.957	126.789	120.494	6.56933e-10	3.36456e-07	Downregulated	0	0	0	Solyc01g079660.2.1	Long cell-linked locus protein
TR19618_c0_g1	27.148	4.951	117.012	99.64	6.11845e-05	0.00200708	Downregulated	0	0	0	Solyc01g087980.2.1	Unknown Protein
TR29204_c0_g1	0	4.924	20.413	24.646	9.28395e-05	0.00270398	Downregulated	RSMB_MACEU	Full=Small nuclear ribonucleoprotein-associated protein B'	GO:0071208,GO:0071204,GO:0071013,GO:0005687,GO:0005829,GO:0070062,GO:0044822,GO:0005685,GO:0005689,GO:0005683,GO:1903146,GO:0034719,GO:0034709,GO:0000387	Solyc01g094540.2.1	Small nuclear ribonucleoprotein-associated protein B IPR017131 Small ribonucleoprotein associated, SmB_SmN
TR4472_c1_g1	904.757	4.917	8.151	8.531	0.00024912	0.00572815	Upregulated	ADAT2_BOVIN	Full=tRNA-specific adenosine deaminase 2	GO:0008251,GO:0002100,GO:0008270	Solyc07g008650.2.1	tRNA-specific adenosine deaminase IPR016193 Cytidine deaminase-like
TR31237_c0_g1	0	4.91	39.638	41.277	1.37959e-06	0.000109246	Downregulated	MCA1_ARATH	Full=Metacaspase-1	GO:0043068,GO:0006952,GO:0004197	Solyc03g094160.2.1	Metacaspase IPR011600 Peptidase C14, caspase catalytic
TR15219_c0_g1	14.384	4.89	203.182	226.707	9.40457e-10	4.39166e-07	Downregulated	TAR4_ARATH	Full=Tryptophan aminotransferase-related protein 4	GO:0008483,GO:0016846,GO:0016021	Solyc02g062190.1.1	Alliinase (Fragment) IPR006948 Allinase, C-terminal
TR19029_c0_g1	4.737	4.89	36.233	42.531	0.00010427	0.00294572	Downregulated	0	0	0	Solyc01g089880.2.1	Unknown Protein IPR004895 Prenylated rab acceptor PRA1
TR32833_c0_g3	0	4.849	20.843	19.796	0.000151315	0.00394165	Downregulated	Y1670_ARATH	Full=Probable receptor-like protein kinase At1g67000	GO:0005524,GO:0005886,GO:0004674,GO:0016021	Solyc02g081500.2.1	Receptor-like kinase IPR002290 Serine_threonine protein kinase
TR6747_c0_g1	10.088	4.815	150.945	154.854	2.99122e-09	1.02632e-06	Downregulated	0	0	0	0	0
TR12978_c0_g1	3.952	4.761	34.477	33.921	1.75395e-05	0.000771331	Downregulated	LRK61_ARATH	Full=Probable L-type lectin-domain containing receptor kinase VI.1	GO:0001653,GO:0030246,GO:0031625,GO:0046777,GO:0009506,GO:0016021,GO:0009755,GO:0005886,GO:0007178,GO:0004675,GO:0005524	Solyc09g005000.1.1	Receptor like protein kinase IPR001220 Legume lectin, beta chain
TR36953_c0_g1	0	4.727	37.069	46.534	3.14987e-06	0.000208812	Downregulated	GRP1_DAUCA	Full=Glycine-rich RNA-binding protein	GO:0000166,GO:0003677,GO:0006950,GO:0003723	Solyc10g051380.1.1	Glycine-rich RNA-binding protein IPR015465 RNA recognition motif, glycine rich protein
TR34132_c0_g1	0	4.72	38.235	42.374	1.40927e-06	0.000110845	Downregulated	CML3_ARATH	Full=Calmodulin-like protein 3	GO:0005777,GO:0005509	Solyc05g050750.1.1	Calmodulin-like protein IPR011992 EF-Hand type
TR25022_c0_g1	37.678	4.679	1.833	1.034	0.000193862	0.0047536	Upregulated	GH35_ORYSJ	Full=Probable indole-3-acetic acid-amido synthetase GH3.5	GO:0009733,GO:0009694,GO:0009611,GO:0009416,GO:0080123,GO:2000030,GO:0010046,GO:0010224,GO:0009864	Solyc10g008520.2.1	Auxin-responsive GH3-like IPR004993 GH3 auxin-responsive promoter
TR54176_c0_g1	0	4.673	18.673	21.387	0.000426152	0.00868925	Downregulated	Y1670_ARATH	Full=Probable receptor-like protein kinase At1g67000	GO:0005524,GO:0005886,GO:0004674,GO:0016021	Solyc02g081500.2.1	Receptor-like kinase IPR002290 Serine_threonine protein kinase
TR29571_c0_g1	114.899	4.652	2.508	0.924	0.000409509	0.00845484	Upregulated	MTBC1_VITVI	Full=Enolase-phosphatase E1 {ECO:0000255|HAMAP-Rule:MF_03118}	GO:0000287,GO:0005829,GO:0043874,GO:0019509,GO:0009570,GO:0046570	Solyc10g007050.2.1	Enolase-phosphatase E-1 IPR010041 2,3-diketo-5-methylthio-1-phosphopentane phosphatase
TR43869_c0_g1	2.455	4.632	0.245	0	9.62289e-07	8.08374e-05	Upregulated	0	0	0	0	0
TR53885_c2_g1	0	4.557	51.125	51.547	1.63784e-07	2.05566e-05	Downregulated	CSLD3_ARATH	Full=Cellulose synthase-like protein D3	GO:0005783,GO:0005768,GO:0005794,GO:0051753,GO:0071555,GO:0000139,GO:0030244,GO:0016760,GO:0005886,GO:0005802,GO:0009409,GO:0016021,GO:0097502	Solyc03g097050.2.1	Cellulose synthase-like protein IPR005150 Cellulose synthase
TR8520_c0_g1	4.811	4.517	25.152	28.751	0.000176055	0.00445453	Downregulated	0	0	0	Solyc01g073890.2.1	CHP-rich zinc finger protein-like IPR011424 C1-like
TR44321_c3_g1	4.541	4.51	68.793	64.223	3.53863e-08	6.29614e-06	Downregulated	Y1491_ARATH	Full=Uncharacterized protein At1g04910	GO:0016021,GO:0005794,GO:0005768,GO:0016757,GO:0005802,GO:0000139	Solyc09g011860.2.1	Os03g0169000 protein (Fragment) IPR004348 Protein of unknown function DUF246, plant
TR44044_c0_g1	7.364	4.496	90.272	86.628	4.59517e-07	4.603e-05	Downregulated	0	0	0	0	0
TR19768_c0_g1	2.921	4.489	0.821	0.259	0.000218653	0.00522217	Upregulated	PP166_ARATH	Full=Pentatricopeptide repeat-containing protein At2g20710, mitochondrial	GO:0005739	Solyc02g078330.2.1	Pentatricopeptide repeat-containing protein IPR002885 Pentatricopeptide repeat
TR37396_c1_g1	0	4.476	21.41	25.515	0.000379434	0.00798975	Downregulated	0	0	0	Solyc00g201060.1.1	Unknown Protein
TR508_c0_g1	591.455	4.435	1.702	1.943	2.48031e-05	0.00100716	Upregulated	0	0	0	Solyc04g077570.1.1	Unknown Protein
TR68787_c0_g1	12.813	4.422	0.23	0.682	1.70841e-05	0.000758723	Upregulated	0	0	0	0	0
TR42543_c1_g1	0	4.401	36.555	34.501	6.11683e-08	9.24923e-06	Downregulated	0	0	0	0	0
TR65274_c0_g1	0	4.381	20.912	23.737	0.000105011	0.00296139	Downregulated	CDPKS_ARATH	Full=Calcium-dependent protein kinase 28	GO:0035556,GO:0018105,GO:0005524,GO:0009931,GO:0009738,GO:0005886,GO:0046777,GO:0005516,GO:0005509,GO:0004683,GO:0005737	Solyc02g083850.2.1	Calcium-dependent protein kinase IPR002290 Serine_threonine protein kinase
TR61380_c1_g1	0	4.374	136.198	134.204	9.54951e-12	2.16043e-08	Downregulated	C94B1_ARATH	Full=Cytochrome P450 94B1	2,GO:0048653,GO:0020037,GO:0009694,GO:0010154,GO:0009555,GO:0009611,GO:0048480,GO:0052694,GO:0016021,GO:0016705,GO:0005506,GO:0002213	Solyc03g111300.1.1	Cytochrome P450
TR37181_c0_g1	0	4.354	37.751	36.545	9.90894e-07	8.23687e-05	Downregulated	LOR15_ARATH	Full=Protein LURP-one-related 15	GO:0009507	Solyc09g014860.2.1	Os03g0816700 protein (Fragment) IPR007612 Protein of unknown function DUF567
TR5879_c0_g1	0	4.347	43.526	36.718	1.41025e-06	0.000110845	Downregulated	0	0	0	0	0
TR68801_c0_g1	7.216	4.34	43.856	48.719	6.26075e-06	0.000362312	Downregulated	M2K5_ARATH	Full=Mitogen-activated protein kinase kinase 5	GO:0023014,GO:0010365,GO:0010229,GO:0009626,GO:0042981,GO:0007346,GO:0010227,GO:0009814,GO:0000165,GO:0005737,GO:0000186,GO:0005634,GO:0005524,GO:0004709,GO:0031098	Solyc03g123800.1.1	Mitogen-activated protein kinase kinase IPR002290 Serine_threonine protein kinase
TR25597_c0_g1	0	4.34	21.494	26.275	0.000309914	0.00679159	Downregulated	0	0	0	Solyc06g084370.1.1	Unknown Protein
TR34179_c0_g1	10.039	4.334	93.01	65.359	1.66022e-06	0.000126121	Downregulated	ERF4_TOBAC	Full=Ethylene-responsive transcription factor 4	GO:0003677,GO:0005634,GO:0003700,GO:0045892,GO:0009873,GO:0006351,GO:0009723,GO:0009737,GO:0009864,GO:0010105,GO:0010200,GO:0016604	Solyc10g009110.1.1	Ethylene-responsive transcription factor 4 IPR001471 Pathogenesis-related transcriptional factor and ERF, DNA-binding
TR23860_c0_g2	0	4.327	22.729	24.818	0.000177583	0.00448539	Downregulated	SPK1_CAEBR	Full=Serine/threonine-protein kinase spk-1	GO:0016021,GO:0009792,GO:0006468,GO:0005524,GO:0004674	Solyc10g085720.1.1	Kinase family protein IPR002290 Serine_threonine protein kinase
TR19649_c0_g1	24.938	4.293	206.034	205.085	1.95452e-07	2.35091e-05	Downregulated	CIGR1_ORYSJ	Full=Chitin-inducible gibberellin-responsive protein 1	GO:0006351,GO:0006355,GO:0005634	Solyc12g005340.1.1	GRAS family transcription factor IPR005202 GRAS transcription factor
TR10864_c0_g2	4.148	4.286	32.729	30.192	5.18249e-05	0.00176194	Downregulated	APK2B_ARATH	Full=Protein kinase 2B, chloroplastic	GO:0005886,GO:0001653,GO:0007178,GO:0005524,GO:0009506,GO:0005737,GO:0005634,GO:0004675,GO:0009536,GO:0009755,GO:0031625,GO:0046777	Solyc01g010660.2.1	Receptor-like protein kinase At3g21340 IPR002290 Serine_threonine protein kinase
TR20412_c0_g1	21.134	4.279	0.598	0	0.000452529	0.00907744	Upregulated	DNJ20_ARATH	Full=Chaperone protein dnaJ 20, chloroplastic	GO:0005634,GO:0010322,GO:0009507,GO:0005737,GO:0061077,GO:1902395	Solyc09g092260.2.1	Chaperone protein dnaJ 20 IPR001623 Heat shock protein DnaJ, N-terminal
TR34220_c1_g2	6.701	4.272	30.236	28.234	0.000258791	0.00588658	Downregulated	FB84_ARATH	Full=F-box protein At1g70590	0	Solyc05g013410.2.1	Sel1 domain protein repeat-containing protein IPR011990 Tetratricopeptide-like helical
TR4443_c3_g6	282.178	4.266	2.116	0.917	7.70958e-05	0.00238839	Upregulated	R1B23_SOLDE	Full=Putative late blight resistance protein homolog R1B-23	GO:0016020,GO:0043531,GO:0009626,GO:0005737,GO:0005524	Solyc06g008450.2.1	Cc-nbs-lrr, resistance protein
TR11506_c0_g1	3.24	4.259	88.8	85.578	1.53999e-09	6.18999e-07	Downregulated	SRO5_ARATH	Full=Probable inactive poly [ADP-ribose] polymerase SRO5	GO:0003950,GO:0009651,GO:0007275,GO:0005739,GO:0016363,GO:0072593	Solyc03g114360.2.1	Poly polymerase catalytic domain containing protein expressed polymerase, catalytic region
TR7124_c0_g2	9.548	4.252	91.676	79.577	1.60239e-06	0.000122904	Downregulated	0	0	0	Solyc03g082370.1.1	Avr9_Cf-9 rapidly elicited protein 65
TR643_c1_g1	99.901	4.245	1.633	1.998	0.00032482	0.00705012	Upregulated	CENPV_HUMAN	Full=Centromere protein V	GO:0007067,GO:0005737,GO:0001667,GO:0005654,GO:0000777,GO:0000776,GO:0005634,GO:0015630,GO:0016846,GO:0051301,GO:0032467,GO:0031508,GO:0051233,GO:0034508,GO:0033044	Solyc11g011450.1.1	Glutathione-dependent formaldehyde-activating GFA IPR006913 Glutathione-dependent formaldehyde-activating, GFA
TR32769_c7_g4	0	4.245	17.269	23.11	0.000155132	0.00402127	Downregulated	R1A3_SOLDE	Full=Putative late blight resistance protein homolog R1A-3	GO:0043531,GO:0016020,GO:0009626,GO:0005737,GO:0005524	Solyc02g027080.1.1	Cc-nbs-lrr, resistance protein
TR7098_c0_g2	0	4.239	21.602	18.566	0.000459984	0.00920373	Downregulated	0	0	0	Solyc01g111250.2.1	Phosphatidylinositol-specific phospholipase c IPR017946 PLC-like phosphodiesterase, TIM beta_alpha-barrel domain
TR35919_c0_g2	0	4.239	18.228	16.263	0.000395246	0.00822993	Downregulated	Y5838_ARATH	Full=Probably inactive leucine-rich repeat receptor-like protein kinase At5g48380	GO:0031625,GO:0031348,GO:0005524,GO:0046777,GO:0016301,GO:0007178,GO:0009506,GO:0009755,GO:0016021,GO:0004672,GO:0005886,GO:0042742,GO:0060548,GO:0033612,GO:0004675,GO:0001653	Solyc07g006480.2.1	LRR receptor-like serine_threonine-protein kinase FEI 1 IPR002290 Serine_threonine protein kinase
TR17856_c0_g1	9.401	4.232	56.685	55.151	4.41648e-05	0.0015565	Downregulated	0	0	0	Solyc05g006390.1.1	Unknown Protein
TR32156_c2_g1	2.504	4.211	47.613	41.81	9.89881e-07	8.23687e-05	Downregulated	NRT23_ARATH	Full=High affinity nitrate transporter 2.3	GO:0016021,GO:0015706,GO:0071249,GO:0042128,GO:0005886,GO:0015112	Solyc06g010250.2.1	Nitrate transporter IPR016196 Major facilitator superfamily, general substrate transporter
TR71094_c0_g1	0	4.205	40.504	31.641	1.36995e-06	0.000108754	Downregulated	0	0	0	Solyc04g076010.2.1	Zinc ion binding protein
TR8495_c0_g1	6.824	4.198	0.744	0.603	7.99644e-05	0.00243918	Upregulated	CDC7_DICDI	Full=Probable serine/threonine-protein kinase cdc7	GO:0005524,GO:0046872,GO:0004674	Solyc08g077990.2.1	Kinase like protein IPR002290 Serine_threonine protein kinase
TR32345_c0_g2	0	4.191	40.251	45.946	4.6694e-07	4.64802e-05	Downregulated	ERF81_ARATH	Full=Ethylene-responsive transcription factor 12	GO:0009873,GO:0005634,GO:0006351,GO:0003700,GO:0003677,GO:0006952	Solyc02g077840.1.1	Ethylene responsive transcription factor 12 IPR001471 Pathogenesis-related transcriptional factor and ERF, DNA-binding
TR57179_c0_g1	27.491	4.178	106.307	108.203	1.34178e-05	0.000632024	Downregulated	ASOL_TOBAC	Full=L-ascorbate oxidase homolog	GO:0005507,GO:0005576,GO:0016491	Solyc01g111970.2.1	Laccase 1a IPR001117 Multicopper oxidase, type 1
TR55758_c0_g1	5.253	4.15	103.73	101.191	6.98042e-09	1.94435e-06	Downregulated	GATA8_ARATH	Full=GATA transcription factor 8	GO:0007623,GO:0008270,GO:0006351,GO:0005634,GO:0003700,GO:0043565,GO:0009845,GO:0045893	Solyc04g015360.2.1	GATA transcription factor 9 IPR000679 Zinc finger, GATA-type
TR35544_c1_g5	2.626	4.123	54.729	60.956	3.44942e-08	6.22346e-06	Downregulated	Y5262_ARATH	Full=Ankyrin repeat-containing protein At5g02620	GO:0005886,GO:0005783,GO:0016021	Solyc08g062360.2.1	Ankyrin repeat protein IPR002110 Ankyrin
TR57188_c0_g1	0	4.123	22.905	25.155	1.72037e-05	0.000762023	Downregulated	CRF4_ARATH	Full=Ethylene-responsive transcription factor CRF4	GO:0005737,GO:0006351,GO:0005634,GO:0048366,GO:0042991,GO:0003700,GO:0003677,GO:0009736,GO:0009873	Solyc03g007460.1.1	Ethylene-responsive transcription factor 4 IPR001471 Pathogenesis-related transcriptional factor and ERF, DNA-binding
TR43384_c0_g1	0	4.096	25.198	27.403	9.47878e-05	0.00274125	Downregulated	NU1M_OENBE	Full=NADH-ubiquinone oxidoreductase chain 1	GO:0070469,GO:0008137,GO:0016021,GO:0005743	Solyc02g080280.1.1	NAD(P)H-quinone oxidoreductase subunit 1 IPR001694 NADH:ubiquinone oxidoreductase, subunit 1
TR26050_c0_g2	0	4.096	25.888	13.263	0.00048056	0.00951946	Downregulated	0	0	0	0	0
TR31163_c0_g1	11.119	4.089	44.04	46.753	5.66205e-05	0.00188898	Downregulated	WRK53_ARATH	Full=Probable WRKY transcription factor 53	GO:0003677,GO:0045893,GO:0009507,GO:0003700,GO:0006351,GO:0005634,GO:0031347,GO:0010200,GO:0009816,GO:0043565,GO:0009751,GO:0010193,GO:0010150,GO:0042542	Solyc08g082110.2.1	WRKY transcription factor-30 IPR003657 DNA-binding WRKY
TR39991_c0_g1	0	4.055	26.364	27.709	1.93671e-05	0.000828069	Downregulated	21KD_DAUCA	Full=21 kDa protein	GO:0004857,GO:0030599	Solyc03g083720.1.1	Pectinesterase IPR006501 Pectinesterase inhibitor
TR16223_c0_g1	9.99	4.042	53.978	55.833	1.75951e-05	0.000771706	Downregulated	MGLL_HUMAN	Full=Monoglyceride lipase {ECO:0000312|HGNC:HGNC:17038}	GO:0050727,GO:0019898,GO:0042803,GO:0019433,GO:0047372,GO:0046474,GO:0019369,GO:0046464,GO:0016020,GO:0044281,GO:0005886,GO:2000124,GO:0009966,GO:0036155,GO:0051930,GO:0007596,GO:0004622,GO:0030168,GO:0006954,GO:0005654,GO:0005789,GO:0006633,GO:0006629,GO:0005829,GO:0006644	Solyc08g066440.2.1	Hydrolase alpha_beta fold family protein IPR000073 Alpha_beta hydrolase fold-1
TR35350_c0_g1	15.513	4.022	82.259	85.414	5.22636e-06	0.000311951	Downregulated	P2C49_ARATH	Full=Probable protein phosphatase 2C 49	GO:0004722,GO:0046872,GO:0006470	Solyc05g053290.2.1	Protein phosphatase-2C IPR015655 Protein phosphatase 2C
TR71603_c0_g1	40.231	4.001	1.327	0.729	0.000195523	0.00478148	Upregulated	0	0	0	Solyc01g109810.2.1	Genomic DNA chromosome 5 TAC clone K1F13
TR19378_c0_g1	3.927	3.974	38.212	38.316	6.18384e-06	0.000359637	Downregulated	0	0	0	Solyc06g049020.1.1	Sorghum bicolor protein targeted either to mitochondria or chloroplast proteins T50848
TR4264_c0_g1	0	3.954	51.463	45.312	2.01284e-07	2.41191e-05	Downregulated	Y1670_ARATH	Full=Probable receptor-like protein kinase At1g67000	GO:0005524,GO:0005886,GO:0004674,GO:0016021	Solyc02g086210.2.1	Receptor-like protein kinase IPR002290 Serine_threonine protein kinase
TR47765_c2_g7	0	3.92	25.796	23.22	1.4521e-05	0.00066633	Downregulated	0	0	0	Solyc03g121890.1.1	Os01g0584100 protein (Fragment)
TR4483_c0_g1	7.879	3.913	33.649	41.606	9.47723e-05	0.00274125	Downregulated	0	0	0	Solyc01g091360.2.1	Homology to unknown gene IPR010865 Protein of unknown function DUF1499
TR19603_c0_g1	0	3.899	19.807	16.404	0.000518523	0.00999085	Downregulated	ASOL_BRANA	Full=L-ascorbate oxidase homolog	GO:0005507,GO:0005576,GO:0016491	Solyc02g065170.2.1	Laccase-22 IPR001117 Multicopper oxidase, type 1
TR10853_c0_g1	6.726	3.893	85.549	76.694	3.52032e-08	6.29614e-06	Downregulated	MYC2_ARATH	Full=Transcription factor MYC2	GO:0045893,GO:0009737,GO:0009611,GO:0043619,GO:2000068,GO:0009269,GO:0043565,GO:0009963,GO:0009738,GO:0006351,GO:0009753,GO:0003677,GO:0003700,GO:0051090,GO:0010200,GO:0005634	Solyc08g076930.1.1	Transcription factor IPR011598 Helix-loop-helix DNA-binding
TR6615_c0_g1	0	3.893	55.228	56.224	3.31474e-08	6.01464e-06	Downregulated	STAR7_MOUSE	Full=StAR-related lipid transfer protein 7, mitochondrial	GO:1903955,GO:0008289,GO:0005739	Solyc03g081320.2.1	Membrane related protein IPR002913 Lipid-binding START
TR35568_c0_g1	3.363	3.879	45.405	36.984	2.21507e-06	0.000159858	Downregulated	0	0	0	Solyc08g076390.2.1	Lysine-specific demethylase 5A IPR013129 Transcription factor jumonji
TR44364_c1_g1	0	3.852	20.176	25.641	1.23319e-05	0.000593316	Downregulated	PIN2_ARATH	Full=Auxin efflux carrier component 2	GO:0005886,GO:0009734,GO:0009733,GO:0009723,GO:0009749,GO:0009958,GO:0009925,GO:0009926,GO:0010315,GO:0016021,GO:0010329,GO:0010252,GO:0005783,GO:0000323	Solyc07g006900.1.1	Auxin efflux carrier protein IPR014024 Auxin efflux carrier, subgroup
TR34881_c3_g4	2.307	3.845	50.167	47.309	9.14552e-08	1.27932e-05	Downregulated	B120_ARATH	Full=G-type lectin S-receptor-like serine/threonine-protein kinase B120	GO:0001653,GO:0004674,GO:0005886,GO:0005524,GO:0030246,GO:0016021,GO:0007178,GO:0009755,GO:0009506,GO:0046777,GO:0031625,GO:0005516,GO:0004675,GO:0048544	Solyc02g079570.2.1	Serine_threonine-protein kinase receptor IPR002290 Serine_threonine protein kinase
TR25067_c0_g1	5.523	3.832	49.499	44.998	2.80958e-06	0.00019104	Downregulated	WRK53_ARATH	Full=Probable WRKY transcription factor 53	GO:0003677,GO:0045893,GO:0009507,GO:0003700,GO:0006351,GO:0005634,GO:0031347,GO:0010200,GO:0009816,GO:0043565,GO:0009751,GO:0010193,GO:0010150,GO:0042542	Solyc08g008280.2.1	WRKY transcription factor-30 IPR003657 DNA-binding WRKY
TR36896_c0_g1	9.696	3.777	59.752	60.18	2.25736e-06	0.000162172	Downregulated	U496D_ORYSJ	Full=UPF0496 protein 4	GO:0016021	Solyc04g071480.1.1	Exocyst subunit Exo70-interacting protein Roh1 (Fragment) IPR008511 Protein of unknown function DUF793
TR38987_c0_g2	10.604	3.757	0.629	0.47	0.000468898	0.00933504	Upregulated	HLS1_ARATH	Full=Probable N-acetyltransferase HLS1	GO:0008080	Solyc02g092490.2.1	Acetyltransferase-like protein IPR000182 GCN5-related N-acetyltransferase
TR4475_c0_g1	6.627	3.757	44.469	50.795	1.3435e-05	0.000632024	Downregulated	0	0	0	Solyc07g052990.1.1	Unknown Protein
TR48108_c0_g1	12.739	3.737	0.176	0	5.10485e-05	0.00174676	Upregulated	0	0	0	Solyc02g062390.2.1	Unknown Protein IPR000167 Dehydrin
TR24706_c0_g1	4.369	3.73	0.123	0	1.67572e-05	0.000748392	Upregulated	0	0	0	0	0
TR18991_c0_g1	2.626	3.682	0.376	0	8.07789e-06	0.000431101	Upregulated	YUC6_ARATH	Full=Indole-3-pyruvate monooxygenase YUCCA6	GO:0009851,GO:0005737,GO:0004499,GO:0050660,GO:0050661	Solyc08g068160.1.1	Monooxygenase IPR000103 Pyridine nucleotide-disulphide oxidoreductase, class-II
TR14059_c1_g1	15.955	3.669	222.238	249.041	5.4078e-10	2.88203e-07	Downregulated	SUBF_BACSU	Full=Bacillopeptidase F	GO:0004252,GO:0005576	Solyc09g007300.1.1	Subtilisin-like protein serine protease-like protein IPR015500 Peptidase S8, subtilisin-related
TR66287_c0_g1	13.328	3.662	65.695	48.006	7.87569e-05	0.00241162	Downregulated	0	0	0	Solyc01g073720.2.1	Unknown Protein
TR44834_c0_g1	0	3.662	30.827	32.926	8.02651e-07	7.02132e-05	Downregulated	IST1_MOUSE	Full=IST1 homolog	GO:0005813,GO:0032403,GO:0005829,GO:0030496,GO:0016023,GO:0008104,GO:0019904,GO:0019076,GO:0048672,GO:0045184,GO:0005793,GO:0009838,GO:0002230,GO:0045862,GO:0046745,GO:0051301,GO:0098779,GO:0000910,GO:0090543,GO:0090541,GO:0070062	Solyc02g085830.2.1	IST1 homolog IPR005061 Protein of unknown function DUF292, eukaryotic
TR65111_c1_g1	2.381	3.655	19.301	22.985	8.24199e-05	0.00248308	Downregulated	IST1_BOVIN	Full=IST1 homolog	GO:0051301,GO:0007049,GO:0016023	Solyc07g032230.2.1	IST1 homolog IPR005061 Protein of unknown function DUF292, eukaryotic
TR12165_c0_g1	0	3.655	36.985	33.741	6.28915e-07	5.78857e-05	Downregulated	ERF1_TOBAC	Full=Ethylene-responsive transcription factor 1	GO:0006351,GO:0003700,GO:0003677,GO:0005634,GO:0009873,GO:0006952	Solyc05g052050.1.1	Ethylene responsive transcription factor 1a IPR001471 Pathogenesis-related transcriptional factor and ERF, DNA-binding
TR7968_c0_g1	0	3.655	15.69	15.456	9.22624e-05	0.00269911	Downregulated	GLR37_ARATH	Full=Glutamate receptor 3.7	GO:0005262,GO:0070588,GO:0016021,GO:0071230,GO:0009506,GO:0004970,GO:0019722,GO:0008066,GO:0006816,GO:0005622,GO:0005886	Solyc07g052390.2.1	Glutamate-gated kainate-type ion channel receptor subunit GluR5 IPR017103 Ionotropic glutamate-like receptor, plant
TR25817_c0_g1	6.357	3.601	32.292	24.003	0.000288237	0.00641531	Downregulated	0	0	0	Solyc08g081700.1.1	Unknown Protein
TR6451_c0_g2	0	3.594	25.536	26.878	8.19946e-05	0.00247261	Downregulated	EIF3C_MEDTR	Full=Eukaryotic translation initiation factor 3 subunit C {ECO:0000255|HAMAP-Rule:MF_03002}	GO:0003743,GO:0001731,GO:0033290,GO:0005852,GO:0006446,GO:0016282	Solyc01g102570.2.1	Eukaryotic translation initiation factor 3 subunit 8-like protein IPR008905 Eukaryotic translation initiation factor 3 subunit 8, N-terminal
TR51892_c0_g1	14.556	3.588	102.312	85.249	2.52372e-06	0.000175357	Downregulated	TIF5A_ARATH	Full=Protein TIFY 5A	GO:0006952,GO:0006351,GO:0006355,GO:0005634	Solyc08g036660.2.1	Protein TIFY 5A IPR018467 CCT domain-like
TR21995_c0_g1	15.292	3.56	52.966	53.623	0.000200262	0.00486544	Downregulated	CML18_ORYSJ	Full=Probable calcium-binding protein CML18	GO:0005509	Solyc02g091500.1.1	Calmodulin IPR011992 EF-Hand type
TR67161_c1_g1	31.124	3.554	101.683	100.564	0.000195445	0.00478148	Downregulated	0	0	0	0	0
TR69679_c0_g1	0	3.554	12.576	14.461	0.00044886	0.00903922	Downregulated	PAO_ARATH	Full=Pheophorbide a oxygenase, chloroplastic	GO:0009534,GO:0009908,GO:0051536,GO:0009941,GO:0009507,GO:0009816,GO:0046872,GO:0008219,GO:0032441,GO:0010154,GO:0009706,GO:0009535,GO:0051537,GO:0015996,GO:0010277	Solyc11g066440.1.1	Pheophorbide a oxygenase (Fragment) IPR013626 Pheophorbide a oxygenase
TR62584_c0_g1	3.412	3.533	0.192	0.306	3.08088e-05	0.00119015	Upregulated	0	0	0	0	0
TR3350_c0_g1	0	3.526	27.974	30.913	1.12905e-05	0.000555842	Downregulated	0	0	0	0	0
TR24402_c0_g1	7.143	3.513	65.971	63.745	9.75624e-07	8.17414e-05	Downregulated	0	0	0	Solyc10g084880.2.1	Avr9_Cf-9 rapidly elicited protein 137 IPR007700 Protein of unknown function DUF668
TR57037_c0_g1	5.007	3.513	0.966	0.627	0.000459256	0.00919886	Upregulated	0	0	0	Solyc01g100440.1.1	Transcription regulatory protein SNF5
TR36482_c1_g1	2.111	3.513	17.361	17.493	0.000280481	0.00626328	Downregulated	PUB44_ARATH	Full=U-box domain-containing protein 44	GO:0090359,GO:0010150,GO:0010380,GO:0070696,GO:0005886,GO:0010271,GO:0004842,GO:0005634,GO:0005737,GO:0016874,GO:0010115	Solyc01g096200.2.1	Pentatricopeptide repeat-containing protein IPR011989 Armadillo-like helical
TR24683_c0_g1	0	3.499	24.048	32.675	6.66207e-06	0.000380481	Downregulated	ACA2_ARATH	Full=Calcium-transporting ATPase 2, plasma membrane-type	GO:0016021,GO:0016020,GO:0015085,GO:0046872,GO:0005516,GO:0006810,GO:0005388,GO:0005789,GO:0005886,GO:0005783,GO:0005524	Solyc02g092450.2.1	Calcium-transporting ATPase 1 IPR006408 ATPase, P-type, calcium-transporting, PMCA-type
TR58999_c0_g1	6.578	3.493	47.391	51.406	8.43672e-06	0.000442079	Downregulated	SAP7_ARATH	Full=Zinc finger A20 and AN1 domain-containing stress-associated protein 7	GO:0008270,GO:0003677,GO:0009506	Solyc08g079700.1.1	Zinc finger A20 and AN1 domain-containing stress-associated protein 7 IPR000058 Zinc finger, AN1-type
TR66871_c0_g1	3.044	3.452	29.14	26.455	1.49873e-05	0.000684759	Downregulated	0	0	0	Solyc10g074820.1.1	Unknown Protein IPR010605 Protein of unknown function DUF1191
TR39760_c0_g1	6.136	3.445	27.721	24.747	0.000171512	0.00436744	Downregulated	0	0	0	Solyc01g079600.2.1	Lipase IPR002921 Lipase, class 3
TR9045_c0_g1	7.511	3.425	0.322	0	4.13607e-06	0.000257019	Upregulated	0	0	0	Solyc02g078930.1.1	Root cap protein 1 (Fragment) IPR009646 Root cap
TR20217_c0_g2	0	3.398	13.872	11.477	6.41314e-05	0.00207165	Downregulated	R1A6_SOLDE	Full=Putative late blight resistance protein homolog R1A-6	GO:0005737,GO:0009626,GO:0005524,GO:0043531,GO:0016020	Solyc05g007170.2.1	Cc-nbs-lrr, resistance protein with an R1 specific domain
TR55214_c0_g1	9.867	3.371	56.922	63.244	2.18357e-05	0.000904596	Downregulated	CAB25_ARATH	Full=Calmodulin-binding protein 25 {ECO:0000303|PubMed:15086802}	GO:0005634,GO:0010337,GO:0009651,GO:0009414,GO:0005516	Solyc10g081040.1.1	Unknown Protein
TR36441_c0_g1	0	3.357	27.461	27.474	3.53269e-06	0.000228002	Downregulated	E70A1_ARATH	Full=Exocyst complex component EXO70A1	GO:0000145,GO:0005576,GO:0005886,GO:0005856,GO:0005618,GO:0005829,GO:0009524,GO:0006887	Solyc09g005830.1.1	Exocyst complex protein EXO70 IPR004140 Exo70 exocyst complex subunit
TR41333_c1_g1	0	3.343	50.09	38.355	4.22979e-08	7.06909e-06	Downregulated	WRK22_ARATH	Full=WRKY transcription factor 22	GO:0043565,GO:0006351,GO:0005634,GO:0003700,GO:0006952,GO:0010150,GO:0010200	Solyc01g095100.2.1	WRKY transcription factor 23 IPR003657 DNA-binding WRKY
TR55226_c0_g1	0	3.323	53.15	51.352	1.64162e-08	3.40705e-06	Downregulated	CML19_ORYSJ	Full=Putative calcium-binding protein CML19	GO:0005509	Solyc02g094000.1.1	Calmodulin-like protein IPR011992 EF-Hand type
TR55837_c0_g1	0	3.296	15.367	17.282	0.000160837	0.00414211	Downregulated	OLP1_SOLLC	Full=Osmotin-like protein	GO:0005576,GO:0005618	Solyc11g066130.1.1	Thaumatin-like protein IPR017949 Thaumatin, conserved site IPR001938 Thaumatin, pathogenesis-related
TR48017_c0_g1	0	3.282	19.455	16.663	0.000445211	0.00898172	Downregulated	0	0	0	Solyc12g005710.1.1	Blue copper protein IPR003245 Plastocyanin-like
TR56340_c0_g1	7.045	3.276	0.299	0.321	0.000133422	0.00356623	Upregulated	KAN4_ARATH	Full=Probable transcription factor KAN4	GO:0006355,GO:0006351,GO:0003700,GO:0005618,GO:0005634,GO:0030154,GO:0044212,GO:0080060,GO:0048481	Solyc04g079600.2.1	Myb family transcription factor-like IPR006447 Myb-like DNA-binding region, SHAQKYF class
TR71667_c3_g1	0	3.269	28.933	27.458	9.19837e-07	7.8307e-05	Downregulated	0	0	0	Solyc03g113950.2.1	Calmodulin-binding protein IPR012416 Calmodulin binding protein-like
TR1873_c1_g1	0	3.248	90.916	86.213	2.26989e-10	1.54429e-07	Downregulated	WRK40_ARATH	Full=Probable WRKY transcription factor 40	GO:0005634,GO:0050832,GO:0031347,GO:0006351,GO:0010200,GO:0009611,GO:0045892,GO:0002237,GO:0003700,GO:0043565,GO:0009751,GO:0042742,GO:0044212	Solyc03g116890.2.1	WRKY transcription factor 2 IPR003657 DNA-binding WRKY
TR25591_c0_g1	16.814	3.242	0.061	0	0.000488827	0.00960534	Upregulated	RAD9A_HUMAN	Full=Cell cycle checkpoint control protein RAD9A	GO:0019899,GO:0017124,GO:0005654,GO:0005737,GO:0006260,GO:0008853,GO:0006974,GO:0006281,GO:0008408,GO:0042826,GO:0030896,GO:0019901,GO:0031573,GO:0071479,GO:0090305,GO:1902231,GO:0005634,GO:0000077,GO:0000076	Solyc10g044780.1.1	Cell cycle checkpoint control protein family IPR007268 Rad9
TR8473_c0_g1	0	3.201	34.745	31.43	3.82982e-07	4.0044e-05	Downregulated	0	0	0	Solyc03g121890.1.1	Os01g0584100 protein (Fragment)
TR50980_c0_g1	0	3.201	21.103	23.76	1.28487e-05	0.00060994	Downregulated	0	0	0	0	0
TR8471_c0_g1	6.038	3.194	35.321	29.887	3.93463e-05	0.00143248	Downregulated	MCU5_ARATH	Full=Calcium uniporter protein 5, mitochondrial	GO:0016021,GO:0005262,GO:0005743	Solyc06g082780.2.1	Coiled-coil domain containing 109B IPR006769 Protein of unknown function DUF607
TR51030_c0_g1	0	3.194	34.201	33.835	8.3886e-07	7.21175e-05	Downregulated	BOR1_ARATH	Full=Boron transporter 1	GO:0016021,GO:0005452,GO:0005768,GO:0010036,GO:0005773	Solyc01g057770.2.1	AE family transporter anion exchange IPR003020 Bicarbonate transporter, eukaryotic
TR57419_c0_g1	0	3.194	18.841	15.707	0.000112816	0.00312597	Downregulated	Y2349_ARATH	Full=Uncharacterized protein At2g33490	GO:0005886	Solyc01g009820.2.1	Hydroxyproline-rich glycoprotein family protein
TR8995_c0_g1	3.731	3.16	25.451	27.027	3.76471e-05	0.00138202	Downregulated	C98A2_SOYBN	Full=Cytochrome P450 98A2	GO:0016021,GO:0005506,GO:0004497,GO:0020037,GO:0016705	Solyc10g078240.1.1	Cytochrome P450
TR21482_c0_g1	0	3.16	26.395	29.244	1.35124e-06	0.000107537	Downregulated	PEX13_ARATH	Full=Peroxisomal membrane protein 13	GO:0005778,GO:0006635,GO:0016558	Solyc06g007700.2.1	Peroxisome biogenesis factor 13
TR66898_c0_g1	0	3.16	18.404	23.463	1.28503e-05	0.00060994	Downregulated	GUX8_ARATH	Full=Putative glucuronosyltransferase PGSIP8	GO:0016021,GO:0046872,GO:0016757	Solyc08g078650.2.1	Glycosyl transferase family 8 glycogenin IPR002495 Glycosyl transferase, family 8
TR8481_c0_g1	8.935	3.14	0.084	0.533	4.41228e-05	0.0015565	Upregulated	SPSA2_CRAPL	Full=Probable sucrose-phosphate synthase 2	GO:0046524,GO:0005986	Solyc09g092130.2.1	Sucrose phosphate synthase IPR012819 Sucrose phosphate synthase, plant
TR36437_c0_g1	4.811	3.14	29.822	29.04	4.4724e-05	0.00157074	Downregulated	GSO1_ARATH	Full=LRR receptor-like serine/threonine-protein kinase GSO1	GO:0046777,GO:0009506,GO:0005886,GO:0016021,GO:0004672,GO:0009755	Solyc09g005080.1.1	LRR receptor-like serine_threonine-protein kinase, RLP
TR36489_c1_g1	0	3.14	18.696	20.776	1.352e-05	0.000634671	Downregulated	Y1765_ARATH	Full=Probable LRR receptor-like serine/threonine-protein kinase At1g07650	GO:0016021,GO:0005524,GO:0004674	Solyc07g055810.2.1	Receptor like kinase, RLK
TR37086_c0_g1	8.002	3.133	88.186	82.304	2.28905e-08	4.51469e-06	Downregulated	PCS1L_ARATH	Full=Aspartic proteinase PCS1	GO:0012501,GO:0004190,GO:0005576,GO:0006508,GO:0005783,GO:0030163,GO:0008233	Solyc05g051240.1.1	Aspartic proteinase nepenthesin I IPR001461 Peptidase A1
TR25039_c0_g1	10.285	3.113	166.251	176.82	2.57213e-10	1.66684e-07	Downregulated	DRE1E_ARATH	Full=Dehydration-responsive element-binding protein 1E	GO:0006351,GO:0005634,GO:0003677,GO:0016049,GO:0048510,GO:0010371,GO:0003700	Solyc08g007820.1.1	Ethylene-responsive transcription factor 10 IPR001471 Pathogenesis-related transcriptional factor and ERF, DNA-binding
TR7914_c0_g2	18.139	3.072	75.718	75.527	1.1878e-05	0.000579376	Downregulated	0	0	0	Solyc03g119250.2.1	Calmodulin-binding protein IPR012416 Calmodulin binding protein-like
TR20258_c0_g2	4.197	3.059	28.227	23.988	9.56035e-05	0.00275731	Downregulated	PTR14_ARATH	Full=Protein NRT1/ PTR FAMILY 7.3	GO:0015706,GO:0010167,GO:0015293,GO:0016021,GO:0005886,GO:0015112	Solyc10g024490.1.1	Peptide transporter-like protein IPR000109 TGF-beta receptor, type I_II extracellular region
TR25681_c0_g1	0	3.011	13.228	14.062	0.000366804	0.00775982	Downregulated	0	0	0	Solyc04g011740.2.1	Unknown Protein
TR51767_c0_g1	4.246	3.004	22.338	25.954	0.000177217	0.00448038	Downregulated	0	0	0	Solyc03g007870.2.1	Heavy metal-associated domain containing protein expressed IPR006121 Heavy metal transport_detoxification protein
TR54156_c0_g1	12.837	2.991	66.416	47.67	3.70584e-05	0.00136832	Downregulated	ZAT11_ARATH	Full=Zinc finger protein ZAT11	GO:0003700,GO:2000280,GO:0006355,GO:0071289,GO:0046872,GO:0010200,GO:0005634,GO:0006351	Solyc11g073060.1.1	Zinc finger family protein IPR007087 Zinc finger, C2H2-type
TR18180_c2_g1	2.896	2.984	20.206	17.72	0.000251105	0.00576126	Downregulated	PUB4_ARATH	Full=U-box domain-containing protein 4	GO:0016874,GO:0004842	Solyc03g043700.2.1	Armadillo_beta-catenin repeat family protein IPR011989 Armadillo-like helical
TR4490_c0_g1	0	2.97	15.851	18.543	2.69922e-05	0.00106901	Downregulated	PLA20_ARATH	Full=Phospholipase A1-IIdelta	GO:0009650,GO:0009507,GO:0071493,GO:0016042,GO:0005737,GO:0008970	Solyc07g055160.2.1	Lipase (Fragment) IPR002921 Lipase, class 3
TR44748_c0_g1	0	2.964	81.277	75.104	5.04267e-10	2.77893e-07	Downregulated	0	0	0	Solyc02g062100.2.1	Senescence-associated protein 12 IPR009686 Senescence-associated
TR52676_c0_g1	9.696	2.957	73.164	57.83	9.0549e-06	0.00047031	Downregulated	FB119_ARATH	Full=F-box protein At2g27310	0	Solyc10g083230.1.1	F-box family protein
TR36432_c1_g2	0	2.93	25.007	20.862	2.13152e-05	0.000890237	Downregulated	YCF2_NASOF	Full=Protein Ycf2 {ECO:0000255|HAMAP-Rule:MF_01330}	GO:0009570,GO:0005524	Solyc12g088910.1.1	Unknown Protein
TR9016_c0_g1	0	2.923	19.179	18.809	1.91795e-05	0.000821897	Downregulated	CNBL1_ARATH	Full=Calcineurin B-like protein 1	GO:0019900,GO:0009738,GO:0090406,GO:0009414,GO:0005737,GO:0005509,GO:0009409,GO:0009651,GO:0005886,GO:0006970,GO:0019722,GO:0009860	Solyc08g007160.2.1	Calcineurin B-like calcium binding protein IPR015757 Calcineurin B protein
TR36697_c0_g1	0	2.923	13.397	12.793	0.000158034	0.0040865	Downregulated	FLS2_ARATH	Full=LRR receptor-like serine/threonine-protein kinase FLS2	GO:0016045,GO:0031625,GO:0016021,GO:0016020,GO:0010359,GO:0005768,GO:0010008,GO:0009755,GO:0009506,GO:0004675,GO:0052544,GO:0005524,GO:0001653,GO:0046777,GO:0042742,GO:0005886,GO:0007178,GO:0006898	Solyc02g070890.2.1	Receptor like kinase, RLK
TR4466_c0_g1	4.786	2.916	39.768	39.648	6.26407e-06	0.000362312	Downregulated	OCS1_MAIZE	Full=Ocs element-binding factor 1	GO:0006351,GO:0005634,GO:0003700,GO:0043565	Solyc06g009640.1.1	BZIP transcription factor IPR011700 Basic leucine zipper
TR6009_c0_g1	20.471	2.903	0	0	0.0002519	0.00577532	Upregulated	GST23_MAIZE	Full=Glutathione transferase GST 23	GO:0004364,GO:0006952	Solyc09g091130.2.1	Glutathione S-transferase IPR004046 Glutathione S-transferase, C-terminal
TR56142_c0_g2	0	2.896	20.881	15.159	0.000184135	0.00460033	Downregulated	0	0	0	0	0
TR21431_c0_g1	0	2.896	13.987	15.033	6.95688e-05	0.00222242	Downregulated	0	0	0	Solyc02g014130.1.1	Hepatoma-derived growth factor-related protein 3 IPR006569 Regulation of nuclear pre-mRNA protein
TR18171_c1_g2	1.865	2.889	29.408	31.046	2.40673e-06	0.000170208	Downregulated	YCX91_PHAAO	Full=Uncharacterized protein ORF91	GO:0009507	Solyc01g007730.2.1	ORF91
TR54775_c0_g1	0	2.875	13.052	13.279	0.000281344	0.00627814	Downregulated	Y1365_METJA	Full=Uncharacterized protein MJ1365	GO:0005886,GO:0016021	Solyc03g026260.2.1	TraB family protein IPR002816 Pheromone shutdown-related, TraB
TR42596_c1_g1	7.56	2.869	35.198	30.498	0.000159495	0.00411766	Downregulated	0	0	0	0	0
TR65682_c0_g1	15.709	2.862	0	0	0.000119625	0.00328312	Upregulated	0	0	0	Solyc07g045230.2.1	Hydroxyproline-rich glycoprotein family protein-like IPR009719 Protein of unknown function DUF1296
TR24711_c0_g1	7.462	2.862	0.667	0	0.000449686	0.00904409	Upregulated	0	0	0	Solyc03g007800.2.1	Topoisomerase 1-associated factor 1 IPR007725 Timeless C-terminal
TR55554_c0_g2	10.015	2.842	0.406	0	8.44916e-05	0.00252157	Upregulated	0	0	0	0	0
TR37263_c0_g1	0	2.828	17.008	17.579	2.28258e-06	0.000163246	Downregulated	Y1839_ARATH	Full=Probable serine/threonine-protein kinase At1g18390	GO:0005524,GO:0005886,GO:0004674,GO:0016021	Solyc05g008980.2.1	Receptor-like protein kinase IPR002290 Serine_threonine protein kinase
TR10918_c1_g4	8.1	2.801	45.704	49.464	1.02577e-05	0.000520324	Downregulated	0	0	0	0	0
TR66935_c0_g1	7.437	2.801	66.148	67.294	3.37258e-06	0.00022081	Downregulated	TIP13_ARATH	Full=Aquaporin TIP1-3	0,GO:0015204,GO:0015250,GO:0034220,GO:0009992,GO:0015793,GO:0006833,GO:0015840,GO:0015254,GO:0005887,GO:0009705,GO:0042807,GO:0071918	Solyc06g075650.2.1	Aquaporin IPR012269 Aquaporin
TR35373_c0_g1	0	2.801	61.961	57.713	1.15226e-09	5.08178e-07	Downregulated	MATE6_ARATH	Full=MATE efflux family protein 6	GO:0016021,GO:0015297,GO:0015238	Solyc03g026230.1.1	Multidrug resistance protein mdtK IPR002528 Multi antimicrobial extrusion protein MatE
TR25667_c0_g1	0	2.713	29.7	31.203	3.7571e-06	0.000240005	Downregulated	NAC94_ARATH	Full=Putative NAC domain-containing protein 94	GO:0003677,GO:0006355,GO:0006351,GO:0005634	Solyc10g055760.1.1	NAC domain protein IPR003441 protein
TR6416_c0_g1	6.357	2.699	42.069	28.946	9.46495e-05	0.00274125	Downregulated	NAC14_ARATH	Full=NAC domain-containing protein 14 {ECO:0000303|PubMed:15029955}	GO:0003700,GO:0003677,GO:0005634,GO:0016021,GO:0006351	Solyc06g073050.2.1	NAC domain protein IPR003441 protein
TR14554_c0_g1	0	2.692	16.456	19.099	6.235e-05	0.0020348	Downregulated	SBT16_ARATH	Full=Subtilisin-like protease SBT1.6 {ECO:0000303|PubMed:16193095}	GO:0004252,GO:0016020,GO:0009827,GO:0005618,GO:0008236	Solyc07g041970.2.1	Subtilisin-like protease IPR015500 Peptidase S8, subtilisin-related
TR52710_c0_g1	4.958	2.679	0.207	0	0.000164517	0.00421295	Upregulated	0	0	0	0	0
TR4538_c0_g1	3.485	2.679	39.339	30.521	2.68184e-06	0.000183929	Downregulated	PGIP_PYRCO	Full=Polygalacturonase inhibitor	GO:0048046,GO:0005618	Solyc09g014480.1.1	Polygalacturonase inhibitor protein IPR013210 Leucine-rich repeat, N-terminal
TR32114_c0_g1	0	2.679	38.748	40.4	1.4314e-08	3.06741e-06	Downregulated	R13L4_ARATH	Full=Disease resistance RPP13-like protein 4	GO:0043531,GO:0006952,GO:0005524	Solyc02g084890.1.1	Cc-nbs-lrr, resistance protein
TR11257_c0_g1	2.185	2.658	22.752	25.39	6.63605e-06	0.000380192	Downregulated	CKX6_ARATH	Full=Cytokinin dehydrogenase 6	GO:0019139,GO:0010103,GO:0050660,GO:0009690,GO:0008762,GO:0005615	Solyc01g088160.2.1	Cytokinin oxidase_dehydrogenase IPR015345 Cytokinin dehydrogenase 1, FAD and cytokinin binding
TR47239_c0_g1	7.683	2.645	142.601	173.977	1.29643e-09	5.43697e-07	Downregulated	SUBF_BACSU	Full=Bacillopeptidase F	GO:0004252,GO:0005576	Solyc09g007300.1.1	Subtilisin-like protein serine protease-like protein IPR015500 Peptidase S8, subtilisin-related
TR43320_c1_g1	0	2.631	13.711	14.665	1.19063e-05	0.000579653	Downregulated	E70A1_ARATH	Full=Exocyst complex component EXO70A1	GO:0000145,GO:0005576,GO:0005886,GO:0005856,GO:0005618,GO:0005829,GO:0009524,GO:0006887	Solyc03g115070.1.1	Exocyst complex component 7 IPR004140 Exo70 exocyst complex subunit
TR29426_c0_g2	0	2.618	59.545	58.951	4.06998e-08	6.86833e-06	Downregulated	UGE1_ARATH	Full=Bifunctional UDP-glucose 4-epimerase and UDP-xylose 4-epimerase 1	GO:0005886,GO:0005829,GO:0003978,GO:0006012,GO:0033358,GO:0045227,GO:0050373,GO:0050662,GO:0071555	Solyc08g080570.2.1	UDP-glucose 4-epimerase IPR005886 UDP-glucose 4-epimerase
TR17856_c0_g2	0	2.618	29.746	35.707	3.54248e-06	0.00022817	Downregulated	0	0	0	Solyc05g006390.1.1	Unknown Protein
TR36502_c1_g1	0	2.597	19.041	26.283	1.44523e-06	0.000112584	Downregulated	CRK10_ARATH	Full=Cysteine-rich receptor-like protein kinase 10	GO:0009755,GO:0001653,GO:0007178,GO:0009506,GO:0016021,GO:0005886,GO:0031625,GO:0005524,GO:0046777,GO:0004675	Solyc02g080010.2.1	RLK, Receptor like protein, putative resistance protein with an antifungal domain
TR51005_c0_g1	6.186	2.591	38.817	44.936	1.25582e-05	0.000599657	Downregulated	HIP26_ARATH	Full=Heavy metal-associated isoprenylated plant protein 26	GO:0009506,GO:0031965,GO:0030001,GO:0005886,GO:0046872,GO:0010286	Solyc11g069070.1.1	Metal ion binding protein IPR006121 Heavy metal transport_detoxification protein
TR4263_c0_g1	0	2.591	12.499	17.861	0.000242497	0.00562063	Downregulated	0	0	0	Solyc05g008360.1.1	Predicted by genscan and genefinder
TR1921_c0_g1	0	2.584	35.666	32.472	1.88396e-07	2.3009e-05	Downregulated	LBD41_ARATH	Full=LOB domain-containing protein 41	GO:0006355	Solyc03g119530.2.1	LOB domain protein 42 IPR004883 Lateral organ boundaries, LOB
TR11292_c2_g5	0	2.577	16.395	24.481	3.80152e-05	0.00139231	Downregulated	ACTA_PHYPO	Full=Actin, plasmodial isoform	0,GO:0005856,GO:0005524,GO:0005737	Solyc05g054480.2.1	Actin IPR004000 Actin_actin-like
TR34077_c0_g1	2.945	2.57	40.949	45.147	9.29882e-05	0.00270398	Downregulated	ARR17_ARATH	Full=Two-component response regulator ARR17	GO:0005634,GO:0000156,GO:0009736,GO:0006355,GO:0006351	Solyc06g048930.2.1	Two-component response regulator ARR3 IPR001789 Signal transduction response regulator, receiver region
TR59784_c1_g1	2.823	2.543	27.967	28.006	4.11041e-06	0.000256109	Downregulated	FB253_ARATH	Full=F-box protein At5g07610	0	Solyc03g117270.1.1	F-box family protein IPR001810 Cyclin-like F-box
TR25820_c0_g1	0	2.536	17.967	14.031	0.000114617	0.00316757	Downregulated	MPK18_ARATH	Full=Mitogen-activated protein kinase 18	GO:0004707,GO:0000165,GO:0043622,GO:0005737,GO:0005524	Solyc07g062080.2.1	Mitogen-activated protein kinase 18 IPR002290 Serine_threonine protein kinase
TR8722_c0_g1	4.934	2.523	26.824	24.34	1.76373e-07	2.1792e-05	Downregulated	RPP13_ARATH	Full=Disease resistance protein RPP13	GO:0005524,GO:0043531,GO:0006952	Solyc04g009290.1.1	Cc-nbs-lrr, resistance protein
TR942_c0_g1	0	2.523	36.785	35.903	2.13308e-08	4.28695e-06	Downregulated	TMVRN_NICGU	Full=TMV resistance protein N	GO:0005524,GO:0005737,GO:0043531,GO:0009626,GO:0007165	Solyc09g092410.2.1	Tir-nbs-lrr, resistance protein
TR66964_c0_g1	0	2.516	15.199	16.702	9.50721e-06	0.000490881	Downregulated	FH5_ARATH	Full=Formin-like protein 5	GO:0005737,GO:0003779,GO:0005618,GO:0009960,GO:0030041,GO:0009524,GO:0016021,GO:0048317,GO:0045010	Solyc10g006540.2.1	Formin 3 IPR015425 Actin-binding FH2
TR70056_c0_g1	0	2.502	16.993	13.6	3.93827e-05	0.00143248	Downregulated	0	0	0	0	0
TR31402_c0_g1	9.205	2.496	62.068	53.874	2.59508e-05	0.00103263	Downregulated	0	0	0	0	0
TR15566_c0_g1	4.369	2.496	24.616	20.776	0.000216584	0.00518659	Downregulated	0	0	0	Solyc08g008150.1.1	Plant cell wall protein SlTFR88
TR70075_c0_g1	3.682	2.496	33.802	29.597	1.42728e-06	0.000111631	Downregulated	Y5707_ARATH	Full=Probable receptor-like protein kinase At5g47070	GO:0005524,GO:0004674,GO:0005886	Solyc08g077560.2.1	ATP binding _ serine-threonine kinase IPR002290 Serine_threonine protein kinase
TR51120_c0_g2	0	2.496	74.161	82.938	2.10868e-10	1.5218e-07	Downregulated	MYC4_ARATH	Full=Transcription factor MYC4	GO:0006952,GO:0003700,GO:0003677,GO:0009718,GO:0006355,GO:0006351,GO:0045893,GO:0043425,GO:0005634	Solyc08g076930.1.1	Transcription factor IPR011598 Helix-loop-helix DNA-binding
TR46382_c1_g1	0	2.489	19.961	11.367	3.14706e-05	0.00120837	Downregulated	SP13B_ARATH	Full=Squamosa promoter-binding-like protein 13B	GO:0048653,GO:0003677,GO:0005634,GO:0006355,GO:0006351,GO:0046872	Solyc05g015840.2.1	Squamosa promoter-binding protein IPR004333 Transcription factor, SBP-box
TR31088_c0_g1	4.762	2.475	21.333	17.344	3.93549e-05	0.00143248	Downregulated	Y5838_ARATH	Full=Probably inactive leucine-rich repeat receptor-like protein kinase At5g48380	GO:0031625,GO:0031348,GO:0005524,GO:0046777,GO:0016301,GO:0007178,GO:0009506,GO:0009755,GO:0016021,GO:0004672,GO:0005886,GO:0042742,GO:0060548,GO:0033612,GO:0004675,GO:0001653	Solyc12g096710.1.1	Receptor like kinase, RLK
TR36550_c0_g1	0	2.462	24.408	13.615	6.29697e-05	0.00204871	Downregulated	ACA7_ARATH	Full=Putative calcium-transporting ATPase 7, plasma membrane-type	GO:0016021,GO:0005524,GO:0005886,GO:0046872,GO:0009555,GO:0005388	Solyc02g092450.2.1	Calcium-transporting ATPase 1 IPR006408 ATPase, P-type, calcium-transporting, PMCA-type
TR20208_c5_g1	14.114	2.428	332.279	355.991	1.52857e-11	2.45834e-08	Downregulated	0	0	0	0	0
TR22090_c0_g2	7.56	2.421	50.565	51.884	1.12363e-06	9.1722e-05	Downregulated	NRT21_ARATH	Full=High-affinity nitrate transporter 2.1	GO:0016021,GO:0015706,GO:0071249,GO:0042128,GO:0005886,GO:0015112	Solyc06g074990.1.1	Nitrate transporter IPR016196 Major facilitator superfamily, general substrate transporter
TR51942_c0_g1	4.958	2.421	29.332	20.227	0.000219306	0.00523204	Downregulated	0	0	0	Solyc11g011030.1.1	Pto-responsive gene 1 protein IPR010399 Tify
TR36728_c0_g1	2.16	2.421	15.459	17.963	0.000242258	0.00561918	Downregulated	TMVRN_NICGU	Full=TMV resistance protein N	GO:0005524,GO:0005737,GO:0043531,GO:0009626,GO:0007165	Solyc09g092410.2.1	Tir-nbs-lrr, resistance protein
TR50611_c0_g1	2.479	2.414	16.755	16.545	0.000107586	0.00302327	Downregulated	PME2_CITSI	Full=Pectinesterase 2	GO:0005576,GO:0004857,GO:0042545,GO:0030599,GO:0005618,GO:0045490,GO:0045330	Solyc01g091050.2.1	Pectinesterase IPR000070 Pectinesterase, catalytic
TR6592_c0_g1	0	2.414	18.281	19.389	1.12372e-05	0.00055493	Downregulated	0	0	0	Solyc10g083360.1.1	Calmodulin binding protein
TR39725_c0_g1	7.879	2.387	101.368	92.691	4.5794e-09	1.42563e-06	Downregulated	NTPR_ENTHA	Full=Protein NtpR	GO:0006541,GO:0016787	Solyc02g086300.2.1	Glutamine amidotransferase IPR011697 Peptidase C26
TR31709_c0_g1	3.976	2.38	146.719	122.821	1.3583e-11	2.39619e-08	Downregulated	TYRA2_ARATH	Full=Arogenate dehydrogenase 2, chloroplastic	GO:0009507,GO:0004665,GO:0008977,GO:0033730,GO:0006571	Solyc09g011870.1.1	Prephenate dehydrogenase family protein-binding domain
TR49909_c0_g1	0	2.374	31.164	34.211	1.14193e-07	1.54302e-05	Downregulated	E1314_ARATH	Full=Glucan endo-1,3-beta-glucosidase 14	GO:0005576,GO:0005634,GO:0005618,GO:0005737,GO:0006952,GO:0042973,GO:0046658,GO:0005975,GO:0071555	Solyc11g068440.1.1	Glucan endo-1 3-beta-glucosidase 7 IPR000490 Glycoside hydrolase, family 17
TR35568_c1_g1	0	2.367	26.924	28.97	1.2585e-07	1.65876e-05	Downregulated	JM706_ORYSJ	Full=Lysine-specific demethylase JMJ706	GO:0005634,GO:0000792,GO:0033169,GO:0046872,GO:0032454,GO:0006355,GO:0006351,GO:0045815,GO:0051213,GO:0048439	Solyc08g076390.2.1	Lysine-specific demethylase 5A IPR013129 Transcription factor jumonji
TR62912_c0_g1	0	2.353	15.69	29.119	0.00010309	0.00291497	Downregulated	KNAP3_MALDO	Full=Homeobox protein knotted-1-like 3	GO:0005634,GO:0003677,GO:0006355	Solyc08g041820.2.1	Homeobox protein knotted-1-like 3 IPR005541 KNOX2
TR49893_c0_g1	0	2.34	14.976	19.554	0.000199625	0.00485738	Downregulated	RD23C_ARATH	Full=Ubiquitin receptor RAD23c	GO:0070628,GO:0043161,GO:0043130,GO:0003684,GO:0031593,GO:0005737,GO:0005634,GO:0006289	Solyc04g007120.2.1	UV excision repair protein RAD23 IPR004806 UV excision repair protein Rad23
TR50622_c0_g1	0	2.333	83.424	80.745	3.46433e-11	4.78288e-08	Downregulated	PER5_VITVI	Full=Peroxidase 5 {ECO:0000250|UniProtKB:P22195}	GO:0006979,GO:0005576,GO:0020037,GO:0004601,GO:0046872,GO:0042744	Solyc01g101050.2.1	Peroxidase 1 IPR002016 Haem peroxidase, plant_fungal_bacterial
TR43219_c0_g1	0	2.326	10.437	10.317	0.000286242	0.00638296	Downregulated	DA1_ARATH	Full=Protein DA1	GO:0043130,GO:0008270	Solyc01g105180.2.1	LIM zinc-binding protein
TR66831_c0_g1	0	2.319	67.359	67.294	2.29842e-10	1.54429e-07	Downregulated	LBD41_ARATH	Full=LOB domain-containing protein 41	GO:0006355	Solyc02g085910.2.1	LOB domain protein 42 IPR004883 Lateral organ boundaries, LOB
TR30602_c1_g1	3.682	2.306	28.595	19.883	4.49542e-05	0.00157558	Downregulated	Y1747_ARATH	Full=Inactive serine/threonine-protein kinase At1g67470	GO:0005524,GO:0004672	Solyc06g060690.2.1	Receptor-like protein kinase At5g59670 IPR002290 Serine_threonine protein kinase
TR63830_c0_g1	0	2.306	48.802	55.519	3.3151e-09	1.09654e-06	Downregulated	0	0	0	Solyc03g123460.2.1	Os10g0422600 protein (Fragment) IPR007650 Protein of unknown function DUF581
TR8716_c0_g2	0	2.306	12.262	14.681	9.33812e-05	0.00271292	Downregulated	TMVRN_NICGU	Full=TMV resistance protein N	GO:0005524,GO:0005737,GO:0043531,GO:0009626,GO:0007165	Solyc09g092410.2.1	Tir-nbs-lrr, resistance protein
TR42619_c0_g1	0	2.299	17.361	16.49	0.000167938	0.00429018	Downregulated	0	0	0	0	0
TR4256_c0_g1	1.669	2.292	11.51	13.6	0.000162858	0.00417722	Downregulated	Y2242_ARATH	Full=Probable LRR receptor-like serine/threonine-protein kinase At2g24230	GO:0016021,GO:0005524,GO:0004674	Solyc02g072520.2.1	Receptor like kinase, RLK
TR45858_c0_g1	0	2.252	18.097	17.164	8.07645e-06	0.000431101	Downregulated	0	0	0	Solyc08g078310.2.1	Unknown Protein IPR012438 Protein of unknown function DUF1639
TR1761_c0_g1	0	2.252	17.545	18.809	0.0001538	0.00399655	Downregulated	GSTX1_SOLTU	Full=Probable glutathione S-transferase	GO:0004364,GO:0006952,GO:0009607	Solyc09g011550.2.1	Glutathione S-transferase-like protein IPR004046 Glutathione S-transferase, C-terminal
TR7744_c0_g1	0	2.245	21.149	18.692	7.2497e-05	0.00227804	Downregulated	PLP9_ARATH	Full=Probable inactive patatin-like protein 9	GO:0016787,GO:0016042	Solyc09g065240.2.1	Patatin-like protein 3 IPR002641 Patatin
TR59718_c0_g5	0	2.224	8.895	9.322	0.000506176	0.00983064	Downregulated	TCP20_ARATH	Full=Transcription factor TCP20	GO:0003700,GO:0006351,GO:0005634,GO:0009653,GO:0043565,GO:0000987	Solyc02g068200.1.1	TCP family transcription factor IPR005333 Transcription factor, TCP
TR6021_c0_g1	4.369	2.218	25.651	25.233	7.03861e-05	0.00224177	Downregulated	MNB1A_MAIZE	Full=Dof zinc finger protein MNB1A	GO:0006351,GO:0005634,GO:0003677,GO:0046872,GO:0006355	Solyc02g078620.1.1	Dof zinc finger protein 6 IPR003851 Zinc finger, Dof-type
TR41376_c0_g1	2.479	2.211	21.218	21.692	3.51731e-05	0.00132176	Downregulated	0	0	0	0	0
TR24337_c0_g1	4.516	2.204	62.106	70.036	5.09051e-08	8.28943e-06	Downregulated	PPA1_SOLLC	Full=Acid phosphatase 1	GO:0003993	Solyc06g062390.2.1	Acid phosphatase IPR010028 Acid phosphatase, plant
TR71654_c4_g2	0	2.197	16.893	22.335	7.99118e-05	0.00243918	Downregulated	Y1571_ARATH	Full=Probable leucine-rich repeat receptor-like protein kinase At1g35710	GO:0005524,GO:0004674,GO:0016021	Solyc06g008270.2.1	LRR receptor-like serine_threonine-protein kinase, RLP
TR24669_c0_g1	0	2.19	20.038	19.648	7.12506e-05	0.00226023	Downregulated	0	0	0	0	0
TR49886_c0_g2	0	2.184	24.408	26.925	1.12693e-06	9.17552e-05	Downregulated	0	0	0	Solyc03g119590.1.1	NIMIN2c protein
TR10961_c0_g1	0	2.157	45.205	29.001	1.38437e-08	2.99652e-06	Downregulated	TGA3_ARATH	Full=Transcription factor TGA3	GO:0009862,GO:0009626,GO:0005634,GO:0006351,GO:0003700,GO:0042742,GO:0005516,GO:0043565	Solyc04g076970.2.1	BZIP transcription factor
TR7988_c0_g1	0	2.15	8.151	9.792	0.000293145	0.00649583	Downregulated	CLDS_TOBAC	Full=Copal-8-ol diphosphate hydratase, chloroplastic	GO:1902243,GO:0000287,GO:1902247,GO:0016836,GO:0009507,GO:0010333	Solyc08g005710.2.1	Ent-copalyl diphosphate synthase (Fragment) IPR001906 Terpene synthase-like
TR21323_c0_g1	5.106	2.116	27.422	26.933	2.21675e-05	0.000912978	Downregulated	C71DA_SOYBN	Full=Cytochrome P450 71D10	GO:0004497,GO:0005506,GO:0020037,GO:0016705	Solyc02g092250.2.1	Cytochrome P450
TR55232_c0_g1	0	2.116	56.945	56.875	7.11717e-09	1.9652e-06	Downregulated	0	0	0	Solyc02g067600.1.1	Unknown Protein
TR658_c0_g1	0	2.116	43.043	46.385	4.00118e-09	1.27054e-06	Downregulated	AT74_ARATH	Full=Phosphoglycerate mutase-like protein AT74 {ECO:0000305}	GO:0005975,GO:0003824	Solyc01g098590.2.1	Phosphoglycerate mutase family protein IPR013078 Phosphoglycerate mutase
TR31668_c3_g1	0	2.109	54.637	49.761	1.54869e-10	1.19944e-07	Downregulated	ABR1_ARATH	Full=Ethylene-responsive transcription factor ABR1	GO:0006351,GO:0006970,GO:0005634,GO:0003700,GO:0003677,GO:0050832,GO:0009788,GO:0009749,GO:0009873,GO:0009738,GO:0009737	Solyc04g051360.2.1	Ethylene responsive transcription factor 2b IPR001471 Pathogenesis-related transcriptional factor and ERF, DNA-binding
TR24467_c0_g1	0	2.102	26.533	24.552	6.61861e-06	0.00038005	Downregulated	0	0	0	Solyc07g054800.1.1	Wound induced protein
TR45867_c0_g2	0	2.102	21.188	23.055	6.87709e-06	0.000388708	Downregulated	0	0	0	Solyc12g010420.1.1	Unknown Protein
TR25131_c0_g1	0	2.089	9.731	10.278	0.00041752	0.00855902	Downregulated	0	0	0	Solyc08g023510.1.1	Unknown Protein
TR16226_c0_g1	0	2.082	26.502	30.396	2.56298e-06	0.000177696	Downregulated	0	0	0	0	0
TR48373_c0_g1	0	2.068	36.548	30.78	9.55255e-09	2.33332e-06	Downregulated	PUB19_ARATH	Full=U-box domain-containing protein 19	GO:0008270,GO:0004842,GO:0016874,GO:0010029	Solyc03g114160.1.1	U-box domain-containing protein IPR011989 Armadillo-like helical
TR41381_c2_g1	2.725	2.048	49.147	55.566	7.24008e-09	1.98191e-06	Downregulated	AGCT2_HORVU	Full=Agmatine coumaroyltransferase-2 {ECO:0000303|PubMed:18270436, ECO:0000312|EMBL:BAF97627.1}	GO:0047634	Solyc11g071470.1.1	Hydroxycinnamoyl CoA shikimate_quinate hydroxycinnamoyltransferase-like protein (Fragment) IPR003480 Transferase
TR66913_c0_g2	0	2.048	63.77	69.464	3.06736e-09	1.03618e-06	Downregulated	XTH15_ARATH	Full=Xyloglucan endotransglucosylase/hydrolase protein 15 {ECO:0000303|PubMed:12514239}	GO:0010411,GO:0005618,GO:0048046,GO:0071555,GO:0042546,GO:0033946,GO:0016762	Solyc07g055990.2.1	Xyloglucan endotransglucosylase_hydrolase 7 IPR016455 Xyloglucan endotransglucosylase_hydrolase
TR45866_c0_g1	0	2.041	24.754	17.532	1.22392e-06	9.86409e-05	Downregulated	F6H1_ARATH	Full=Feruloyl CoA ortho-hydroxylase 1	GO:0009805,GO:0046872,GO:0009699,GO:0051213,GO:0016706,GO:0010421	Solyc09g008560.2.1	1-aminocyclopropane-1-carboxylate oxidase IPR005123 Oxoglutarate and iron-dependent oxygenase
TR41996_c0_g1	0	2.021	42.751	56.052	2.09329e-08	4.23377e-06	Downregulated	0	0	0	0	0
TR13387_c0_g1	0	2.007	10.26	9.785	0.000168717	0.00430663	Downregulated	PR1F2_ARATH	Full=PRA1 family protein F2 {ECO:0000303|PubMed:18583532}	GO:0016021,GO:0016192,GO:0010008,GO:0005794,GO:0005783,GO:0005774	Solyc09g066000.1.1	Prenylated rab acceptor PRA1 IPR004895 Prenylated rab acceptor PRA1
TR51948_c1_g1	0	1.994	19.455	18.418	9.68787e-05	0.00278438	Downregulated	TENA_DROME	Full=Teneurin-a	GO:0050808,GO:0042803,GO:0046982,GO:0048790,GO:0048788,GO:0005576,GO:0048786,GO:0051124,GO:0042734,GO:0003824,GO:0001941,GO:0040017,GO:0097090,GO:2000331,GO:0034116,GO:0048036,GO:0007274,GO:0007155,GO:0043025,GO:0048499,GO:0005578,GO:0034110,GO:0031594,GO:0016200,GO:0008039,GO:0030054,GO:0016021,GO:0030424	0	0
TR49560_c0_g2	0	1.987	12.622	14.414	1.90636e-05	0.000818035	Downregulated	MGDG_TOBAC	Full=Probable monogalactosyldiacylglycerol synthase, chloroplastic	GO:0030259,GO:0031969,GO:0030246,GO:0046509,GO:0009247	Solyc08g006640.2.1	Processive diacylglycerol glucosyltransferase IPR009695 Monogalactosyldiacylglycerol synthase
TR19428_c3_g1	0	1.973	10.23	13.709	0.000509409	0.0098874	Downregulated	R1B19_SOLDE	Full=Putative late blight resistance protein homolog R1B-19	GO:0043531,GO:0016020,GO:0009626,GO:0005737,GO:0005524	Solyc02g027080.1.1	Cc-nbs-lrr, resistance protein
TR2501_c1_g1	0	1.967	7.477	11.344	0.000257315	0.00586982	Downregulated	0	0	0	0	0
TR11574_c0_g1	0	1.96	51.792	43.941	5.44037e-09	1.63082e-06	Downregulated	NPK1_TOBAC	Full=Mitogen-activated protein kinase kinase kinase NPK1	GO:0005856,GO:0005634,GO:0005524,GO:0004709,GO:0009524,GO:0006952,GO:0000919	Solyc02g090980.1.1	Protein serine_threonine kinase IPR002290 Serine_threonine protein kinase
TR66875_c0_g1	0	1.96	19.938	20.799	6.23907e-07	5.75917e-05	Downregulated	HBP1B_WHEAT	Full=Transcription factor HBP-1b(c38)	GO:0005634,GO:0003700,GO:0006351,GO:0043565	Solyc05g056410.1.1	BZIP transcription factor
TR53207_c0_g1	0	1.946	173.789	182.688	8.47054e-14	1.21723e-09	Downregulated	0	0	0	0	0
TR31087_c0_g1	0	1.933	22.507	23.941	3.80915e-07	4.0044e-05	Downregulated	0	0	0	Solyc01g005800.2.1	Calmodulin binding protein
TR11292_c1_g2	0	1.926	139.634	150.091	1.02802e-13	1.21723e-09	Downregulated	ACT_MANSE	Full=Actin, muscle	GO:0005737,GO:0005524,GO:0005856	Solyc10g080500.1.1	Actin IPR004000 Actin_actin-like
TR64443_c0_g1	9.057	1.912	26.18	29.573	0.000426335	0.00868925	Downregulated	0	0	0	Solyc12g096570.1.1	ARGOS
TR26081_c0_g1	0	1.912	29.01	30.458	6.32244e-08	9.42548e-06	Downregulated	TT12_ARATH	Full=Protein TRANSPARENT TESTA 12	GO:0016021,GO:1902600,GO:0015299,GO:0015238,GO:0010231,GO:0022857,GO:0010023,GO:0009813,GO:0009705	Solyc03g025200.2.1	Multidrug resistance protein mdtK IPR002528 Multi antimicrobial extrusion protein MatE
TR18019_c0_g1	0	1.906	16.065	12.895	0.000133297	0.00356589	Downregulated	NIPL1_ARATH	Full=NEP1-interacting protein-like 1	GO:0008270,GO:0006952,GO:0016021	Solyc12g005020.1.1	Ring H2 finger protein IPR018957 Zinc finger, C3HC4 RING-type
TR61050_c0_g1	403.41	1.899	0.659	1.669	0.000124329	0.0033801	Upregulated	0	0	0	Solyc01g111620.2.1	AT4G35080-like protein (Fragment) IPR011541 Nickel_cobalt transporter, high-affinity
TR31218_c0_g1	0	1.885	27.108	26.346	2.78012e-08	5.13584e-06	Downregulated	FRO4_ARATH	Full=Ferric reduction oxidase 4	GO:0000293,GO:0016021,GO:0006811,GO:0046872	Solyc00g026160.2.1	Ferric reductase oxidase IPR013121 Ferric reductase, NAD binding
TR51553_c0_g1	0	1.865	8.596	8.939	0.000130418	0.0035012	Downregulated	PP340_ARATH	Full=Pentatricopeptide repeat-containing protein At4g28010	0	Solyc11g073270.1.1	Pentatricopeptide repeat-containing protein IPR002885 Pentatricopeptide repeat
TR70523_c3_g1	0	1.858	46.931	39.773	1.31238e-07	1.72204e-05	Downregulated	0	0	0	Solyc11g056350.1.1	Unknown Protein
TR53215_c0_g1	0	1.858	11.602	12.566	2.76357e-05	0.00109012	Downregulated	R3HD1_HUMAN	Full=R3H domain-containing protein 1	GO:0044822	Solyc11g007110.1.1	Single-stranded nucleic acid binding R3H protein (Fragment) IPR001374 Single-stranded nucleic acid binding R3H
TR30746_c0_g1	4.345	1.851	75.495	72.864	8.23026e-09	2.15986e-06	Downregulated	DRE1A_ARATH	Full=Dehydration-responsive element-binding protein 1A	GO:0009631,GO:0003677,GO:0009414,GO:0009409,GO:0006351,GO:0003700,GO:0005634	Solyc03g026270.1.1	Ethylene-responsive transcription factor 4 IPR001471 Pathogenesis-related transcriptional factor and ERF, DNA-binding
TR9041_c1_g2	0	1.845	14.087	9.346	0.000374721	0.00791149	Downregulated	0	0	0	0	0
TR37109_c3_g1	0	1.838	88.409	83.917	5.07583e-10	2.77893e-07	Downregulated	XTH23_ARATH	Full=Probable xyloglucan endotransglucosylase/hydrolase protein 23	GO:0004553,GO:0005618,GO:0048046,GO:0016762,GO:0071555,GO:0010411,GO:0042546	Solyc07g055990.2.1	Xyloglucan endotransglucosylase_hydrolase 7 IPR016455 Xyloglucan endotransglucosylase_hydrolase
TR7348_c0_g1	0	1.838	11.648	12.26	1.41882e-05	0.000656751	Downregulated	RLK1_ARATH	Full=G-type lectin S-receptor-like serine/threonine-protein kinase RLK1	GO:0005886,GO:0005516,GO:0016021,GO:0005524,GO:0030246,GO:0004674	Solyc09g075920.1.1	Receptor-like protein kinase IPR002290 Serine_threonine protein kinase
TR42547_c0_g1	0	1.831	19.102	26.032	4.35661e-06	0.000267582	Downregulated	YCF68_EUCGG	Full=Uncharacterized protein ycf68	GO:0009507	Solyc03g025220.2.1	Multidrug resistance protein mdtK IPR002528 Multi antimicrobial extrusion protein MatE
TR55691_c0_g1	0	1.811	14.501	10.176	0.000512859	0.00992402	Downregulated	0	0	0	Solyc01g087570.2.1	Unknown Protein
TR18537_c0_g1	0	1.804	105.394	91.524	2.33438e-10	1.54429e-07	Downregulated	0	0	0	0	0
TR68777_c0_g2	5.891	1.79	28.396	24.575	0.000184707	0.00461098	Downregulated	GDL15_ARATH	Full=GDSL esterase/lipase At1g29670	GO:0009507,GO:0016042,GO:0005618,GO:0048046,GO:0009534,GO:0016788	Solyc02g071690.1.1	GDSL esterase_lipase At1g29670 IPR001087 Lipase, GDSL
TR13978_c0_g1	0	1.777	27.522	25.711	7.73358e-07	6.8473e-05	Downregulated	0	0	0	Solyc02g090120.1.1	Unknown Protein
TR70100_c0_g1	0	1.77	50.274	71.931	3.0234e-10	1.88245e-07	Downregulated	EF1A_HYPJE	Full=Elongation factor 1-alpha	GO:0003924,GO:0005525,GO:0005737,GO:0003746	Solyc06g009970.2.1	Elongation factor 1-alpha IPR004539 Translation elongation factor EF1A, eukaryotic and archaeal IPR000795 Protein synthesis factor, GTP-binding
TR31748_c0_g1	0	1.763	21.165	16.295	3.79754e-05	0.00139231	Downregulated	RHA2A_ARATH	Full=E3 ubiquitin-protein ligase RHA2A	GO:0004842,GO:0009738,GO:0016874,GO:0009651,GO:0005634,GO:0008270,GO:0016567,GO:0005737,GO:0009789,GO:0047484	Solyc05g008640.1.1	RING finger protein IPR018957 Zinc finger, C3HC4 RING-type
TR40355_c0_g1	0	1.756	22.077	18.574	1.49512e-06	0.000115795	Downregulated	PHYSA_PHYPO	Full=Physarolisin	GO:0046872,GO:0004252	0	0
TR21921_c0_g1	9.597	1.75	70.963	83.494	1.71632e-06	0.00012872	Downregulated	0	0	0	Solyc06g050870.2.1	Hypoxia induced protein conserved region containing protein expressed
TR38973_c0_g1	0	1.736	16.824	16.138	2.42679e-06	0.000171162	Downregulated	MKKA_DICDI	Full=Mitogen-activated protein kinase kinase kinase A {ECO:0000303|PubMed:9832508}	GO:0005874,GO:0005737,GO:0043622,GO:0005524,GO:0004709	Solyc07g064820.1.1	Protein serine_threonine kinase IPR002290 Serine_threonine protein kinase
TR23551_c1_g1	0	1.729	15.459	19.029	5.25772e-05	0.00178179	Downregulated	0	0	0	0	0
TR64382_c0_g2	0	1.729	16.395	11.383	6.40332e-05	0.00207058	Downregulated	0	0	0	0	0
TR6756_c0_g1	0	1.716	19.194	7.897	0.000292782	0.00649477	Downregulated	WRK50_ARATH	Full=Probable WRKY transcription factor 50	GO:0006351,GO:0043565,GO:0009867,GO:0050832,GO:0005634,GO:0003700	Solyc04g051690.2.1	WRKY transcription factor 16 IPR003657 DNA-binding WRKY
TR36475_c1_g4	0	1.716	9.793	8.923	0.000406769	0.00842566	Downregulated	0	0	0	0	0
TR36796_c0_g1	0	1.695	7.691	6.784	0.000267792	0.00604799	Downregulated	TMVRN_NICGU	Full=TMV resistance protein N	GO:0005524,GO:0005737,GO:0043531,GO:0009626,GO:0007165	Solyc01g014840.2.1	Tir-nbs-lrr, resistance protein
TR43931_c0_g1	8.051	1.682	33.749	30.247	7.86243e-05	0.00241162	Downregulated	ILL4_ARATH	Full=IAA-amino acid hydrolase ILR1-like 4	GO:0005783,GO:0010179,GO:0005788,GO:0009611,GO:0005886	Solyc05g006220.2.1	IAA-amino acid hydrolase IPR017439 Peptidase M20D, mername-AA028_carboxypeptidase Ss1
TR2639_c0_g1	0	1.682	14.417	11.32	8.05016e-05	0.00244851	Downregulated	VTSS1_HYOMU	Full=Vetispiradiene synthase 1	GO:0016114,GO:0005737,GO:0034003,GO:0000287	Solyc01g101180.2.1	Alpha-humulene_(-)-(E)-beta-caryophyllene synthase IPR005630 Terpene synthase, metal-binding domain
TR15569_c0_g1	0	1.675	12.614	10.262	7.79729e-05	0.00240384	Downregulated	0	0	0	Solyc03g114130.1.1	NHL repeat-containing protein-like
TR65112_c0_g1	0	1.668	6.242	7.019	0.000467201	0.00930709	Downregulated	TI100_ARATH	Full=Protein TIC 100 {ECO:0000303|PubMed:23372012}	GO:0009535,GO:0009507,GO:0009536,GO:0009658,GO:0045037,GO:0009793,GO:0009941,GO:0009706,GO:0008565	Solyc11g066870.1.1	Genomic DNA chromosome 5 P1 clone MDJ22 IPR003409 MORN motif
TR36472_c1_g1	0	1.662	75.771	76.726	1.84427e-11	2.78871e-08	Downregulated	BEATH_CLABR	Full=Acetyl-CoA-benzylalcohol acetyltransferase	0,GO:0016747	Solyc12g096790.1.1	Hydroxycinnamoyl CoA quinate transferase IPR003480 Transferase
TR29180_c0_g2	0	1.662	28.488	21.833	6.22904e-08	9.33004e-06	Downregulated	BCH2_CAPAN	Full=Beta-carotene hydroxylase 2, chloroplastic	GO:0006633,GO:0016787,GO:0016491,GO:0031969,GO:0005506,GO:0016117,GO:0016021	Solyc06g036260.2.1	Beta-carotene hydroxylase 1
TR47598_c0_g1	0	1.662	14.018	16.859	4.20267e-06	0.00026014	Downregulated	1A1C_SOYBN	Full=1-aminocyclopropane-1-carboxylate synthase	GO:0009693,GO:0009835,GO:0016847,GO:0030170	Solyc08g008100.2.1	1-aminocyclopropane-1-carboxylate synthase IPR004839 Aminotransferase, class I and II
TR44758_c0_g1	0	1.662	12.952	11.782	0.000154377	0.00400795	Downregulated	WRK65_ARATH	Full=Probable WRKY transcription factor 65	GO:0043565,GO:0006351,GO:0005634,GO:0003700	Solyc07g055280.2.1	WRKY transcription factor 5 IPR003657 DNA-binding WRKY
TR38107_c0_g1	0	1.648	10.26	13.85	0.00026292	0.00596341	Downregulated	0	0	0	Solyc03g111190.1.1	Auxin-independent growth promoter-like protein IPR004348 Protein of unknown function DUF246, plant
TR46483_c0_g1	4.664	1.634	17.147	21.097	0.000480891	0.00952009	Downregulated	0	0	0	Solyc07g007660.1.1	Unknown Protein
TR68763_c0_g1	0	1.614	63.632	53.373	5.44568e-10	2.88203e-07	Downregulated	MYB44_ARATH	Full=Transcription factor MYB44	GO:0009723,GO:0003677,GO:2000022,GO:2000031,GO:0009751,GO:0010200,GO:0009753,GO:0009651,GO:0050832,GO:0009414,GO:0006351,GO:0046686,GO:0009739,GO:0042742,GO:0005634,GO:0003700,GO:0009733,GO:0009737,GO:0009738	Solyc04g079360.1.1	MYB transcription factor IPR015495 Myb transcription factor
TR48538_c0_g1	12.469	1.6	34.393	36.921	0.000411047	0.00848108	Downregulated	0	0	0	Solyc04g064530.1.1	Unknown Protein
TR44394_c0_g1	8.689	1.6	27.859	26.064	7.02661e-05	0.00224148	Downregulated	HFA2B_ORYSJ	Full=Heat stress transcription factor A-2b	GO:0043565,GO:0003700,GO:0005634,GO:0009408,GO:0006351,GO:0005737	Solyc09g065660.2.1	Heat stress transcription factor A3-type, DNA-binding
TR66787_c0_g1	0	1.6	15.482	12.291	1.22038e-05	0.000588042	Downregulated	ELO3L_ARATH	Full=Elongation of fatty acids protein 3-like	GO:0071215,GO:0042761,GO:0030497,GO:0016021,GO:0009922	Solyc02g089860.1.1	GNS1_SUR4 membrane family protein IPR002076 GNS1_SUR4 membrane protein
TR33179_c0_g1	0	1.594	11.633	10.834	4.5991e-05	0.00159884	Downregulated	CXE16_ARATH	Full=Probable carboxylesterase 16	GO:0052689	Solyc05g014320.2.1	Acetyl esterase IPR013094 Alpha_beta hydrolase fold-3
TR66431_c0_g1	0	1.567	55.619	56.483	1.96453e-10	1.48527e-07	Downregulated	ERF12_ARATH	Full=Ethylene-responsive transcription factor ERF012	GO:0044212,GO:0045893,GO:0009753,GO:0034605,GO:0009751,GO:0006351,GO:0005634,GO:0003700,GO:0009873,GO:0071497	Solyc11g012980.1.1	Ethylene-responsive transcription factor 9 IPR001471 Pathogenesis-related transcriptional factor and ERF, DNA-binding
TR13555_c0_g1	0	1.546	22.537	29.142	1.30623e-06	0.000104743	Downregulated	TT12_ARATH	Full=Protein TRANSPARENT TESTA 12	GO:0016021,GO:1902600,GO:0015299,GO:0015238,GO:0010231,GO:0022857,GO:0010023,GO:0009813,GO:0009705	Solyc03g025200.2.1	Multidrug resistance protein mdtK IPR002528 Multi antimicrobial extrusion protein MatE
TR67042_c0_g1	4.001	1.539	59.714	70.318	1.33173e-08	2.928e-06	Downregulated	0	0	0	0	0
TR66495_c0_g1	0	1.533	18.013	21.637	5.37652e-07	5.15788e-05	Downregulated	RPI2_ARATH	Full=Probable ribose-5-phosphate isomerase 2	GO:0004751,GO:0005737,GO:0009052,GO:0008219,GO:0010228	Solyc05g008370.1.1	Ribose-5-phosphate isomerase IPR004788 Ribose 5-phosphate isomerase
TR22144_c0_g1	0	1.533	11.319	15.362	0.000320264	0.00697403	Downregulated	NIP1_ARATH	Full=NEP1-interacting protein 1	GO:0009535,GO:0008270,GO:0016021	Solyc12g005020.1.1	Ring H2 finger protein IPR018957 Zinc finger, C3HC4 RING-type
TR11573_c0_g1	9.352	1.499	32.598	25.131	0.000328234	0.00709029	Downregulated	ERF17_ARATH	Full=Ethylene-responsive transcription factor ERF017	GO:0006351,GO:0005634,GO:0003700,GO:0003677,GO:0009873	Solyc12g009240.1.1	Ethylene-responsive transcription factor 4 IPR001471 Pathogenesis-related transcriptional factor and ERF, DNA-binding
TR68762_c0_g2	0	1.492	13.412	15.362	2.03056e-06	0.000149255	Downregulated	PTR45_ARATH	Full=Protein NRT1/ PTR FAMILY 5.7	GO:0006857,GO:0016021,GO:0005886,GO:0005215	Solyc10g084950.1.1	Solute carrier family 15 member 4 IPR000109 TGF-beta receptor, type I_II extracellular region
TR60350_c0_g1	0	1.485	15.95	10.709	5.17832e-05	0.00176194	Downregulated	0	0	0	0	0
TR67234_c0_g1	0	1.478	45.09	42.452	2.63182e-09	9.28563e-07	Downregulated	0	0	0	0	0
TR28396_c0_g1	0	1.478	15.398	14.242	1.13555e-05	0.000558177	Downregulated	RD23C_ARATH	Full=Ubiquitin receptor RAD23c	GO:0070628,GO:0043161,GO:0043130,GO:0003684,GO:0031593,GO:0005737,GO:0005634,GO:0006289	Solyc04g007120.2.1	UV excision repair protein RAD23 IPR004806 UV excision repair protein Rad23
TR28393_c0_g1	0	1.472	31.256	29.37	5.02067e-07	4.92057e-05	Downregulated	0	0	0	Solyc02g089140.2.1	B12D-like protein IPR010530 B12D
TR57451_c0_g1	0	1.445	12.446	13.216	7.10443e-05	0.0022582	Downregulated	0	0	0	0	0
TR12978_c0_g2	0.785	1.438	17.607	22.961	7.76289e-07	6.8473e-05	Downregulated	LRK61_ARATH	Full=Probable L-type lectin-domain containing receptor kinase VI.1	GO:0001653,GO:0030246,GO:0031625,GO:0046777,GO:0009506,GO:0016021,GO:0009755,GO:0005886,GO:0007178,GO:0004675,GO:0005524	Solyc09g005000.1.1	Receptor like protein kinase IPR001220 Legume lectin, beta chain
TR9480_c0_g1	0	1.438	8.673	10.474	0.000462894	0.00923868	Downregulated	0	0	0	Solyc11g005150.1.1	Leucine-rich repeat family protein IPR006706 Extensin-like region
TR46126_c0_g1	0	1.424	23.481	23.369	6.1884e-08	9.3131e-06	Downregulated	PHYSA_PHYPO	Full=Physarolisin	GO:0046872,GO:0004252	0	0
TR57988_c0_g1	0	1.417	10.552	9.111	9.6421e-05	0.00277584	Downregulated	0	0	0	Solyc00g013170.1.1	Unknown Protein
TR18747_c0_g1	0	1.377	17.193	18.817	1.72155e-05	0.000762023	Downregulated	0	0	0	0	0
TR34051_c0_g1	0	1.37	18.212	13.623	1.83015e-05	0.000794128	Downregulated	0	0	0	0	0
TR7733_c0_g1	0	1.363	8.013	8.97	0.000364508	0.0077267	Downregulated	AX22D_VIGRR	Full=Auxin-induced protein 22D	GO:0009734,GO:0005634,GO:0006351,GO:0006355	Solyc09g065850.2.1	Auxin responsive protein IPR003311 AUX_IAA protein
TR39981_c0_g1	0	1.356	21.732	20.713	1.20116e-06	9.73004e-05	Downregulated	0	0	0	Solyc09g009890.2.1	Polyadenylate-binding protein IPR012677 Nucleotide-binding, alpha-beta plait
TR8231_c0_g1	11.095	1.35	51.555	46.252	2.75836e-05	0.00108941	Downregulated	M3K1_ARATH	Full=Mitogen-activated protein kinase kinase kinase 1	GO:0000186,GO:0000165,GO:1902065,GO:0010449,GO:0009651,GO:0045087,GO:0003677,GO:0004674,GO:0005634,GO:0005524,GO:0009611,GO:0009409,GO:0006970,GO:0004709,GO:0019900,GO:0046777,GO:0022622	Solyc02g064980.1.1	Protein serine_threonine kinase IPR002290 Serine_threonine protein kinase
TR12237_c0_g1	0	1.343	10.268	14.548	2.12189e-05	0.000888897	Downregulated	ERF03_ARATH	Full=Ethylene-responsive transcription factor ERF003	GO:0005634,GO:0003700,GO:0006351,GO:0009873,GO:0003677	Solyc06g065820.2.1	Ethylene-responsive transcription factor 7 IPR001471 Pathogenesis-related transcriptional factor and ERF, DNA-binding
TR51046_c0_g1	0	1.336	58.479	67.059	1.47687e-10	1.17242e-07	Downregulated	0	0	0	0	0
TR46391_c0_g1	0	1.336	14.041	17.164	3.03303e-06	0.000202759	Downregulated	DI197_ARATH	Full=Protein DEHYDRATION-INDUCED 19 homolog 7	GO:0009785,GO:0005634,GO:0010161	Solyc01g065550.2.1	Protein DEHYDRATION-INDUCED 19 homolog 4 IPR008598 Drought induced 19
TR34112_c0_g1	0	1.336	10.743	14.853	5.22977e-05	0.00177421	Downregulated	Y4117_ARATH	Full=Putative disease resistance protein At4g11170	GO:0043531,GO:0006952,GO:0010193,GO:0007165,GO:0005739	Solyc09g092410.2.1	Tir-nbs-lrr, resistance protein
TR21495_c0_g1	0	1.329	9.164	8.022	0.000122957	0.00336004	Downregulated	0	0	0	0	0
TR60327_c0_g1	138.193	1.316	0.215	0	6.80605e-06	0.00038731	Upregulated	AB20G_ARATH	Full=ABC transporter G family member 20	GO:0016887,GO:0006810,GO:0005524,GO:0016021,GO:0010345	Solyc04g010200.1.1	ABC transporter G family member 6 IPR013525 ABC-2 type transporter
TR54213_c1_g1	0	1.316	20.521	22.538	9.32351e-08	1.29743e-05	Downregulated	0	0	0	Solyc01g103580.2.1	Genomic DNA chromosome 5 P1 clone MCL19 IPR007770 Protein of unknown function DUF679
TR14027_c0_g1	3.044	1.295	71.009	66.98	5.70681e-10	2.97072e-07	Downregulated	UFC_ARATH	Full=Protein UPSTREAM OF FLC	0	Solyc06g075690.2.1	Auxin-regulated protein IPR010369 Protein of unknown function DUF966
TR37152_c0_g1	0	1.289	17.883	17.603	5.66627e-08	8.75411e-06	Downregulated	0	0	0	Solyc02g062100.2.1	Senescence-associated protein 12 IPR009686 Senescence-associated
TR51061_c0_g1	0	1.282	29.753	28.108	8.11859e-07	7.08235e-05	Downregulated	0	0	0	0	0
TR56402_c0_g1	0	1.282	13.389	16.82	4.63106e-07	4.62436e-05	Downregulated	LRX1_ARATH	Full=Leucine-rich repeat extensin-like protein 1	GO:0009826,GO:0071555,GO:0010054,GO:0009506,GO:0005576,GO:0005199,GO:0000904,GO:0009505	Solyc11g005150.1.1	Leucine-rich repeat family protein IPR006706 Extensin-like region
TR69658_c0_g1	0	1.268	41.34	48.492	1.27094e-09	5.43697e-07	Downregulated	RCO3_NEUCR	Full=Probable glucose transporter rco-3	GO:0022891,GO:0016021,GO:0008643	Solyc03g096950.2.1	D-xylose transporter IPR003663 Sugar_inositol transporter
TR6641_c0_g1	0	1.261	13.849	12.73	1.42259e-05	0.000657539	Downregulated	SLAH1_ARATH	Full=S-type anion channel SLAH1	GO:0008308,GO:0006873,GO:0005886,GO:0016021	Solyc07g051950.2.1	C4-dicarboxylate transporter_malic acid transport family protein IPR004695 C4-dicarboxylate transporter_malic acid transport protein
TR24639_c0_g1	0	1.255	16.525	16.53	8.14421e-05	0.00246278	Downregulated	WRK65_ARATH	Full=Probable WRKY transcription factor 65	GO:0043565,GO:0006351,GO:0005634,GO:0003700	Solyc07g055280.2.1	WRKY transcription factor 5 IPR003657 DNA-binding WRKY
TR11037_c0_g1	0	1.241	72.221	72.206	1.02696e-11	2.16043e-08	Downregulated	MYB4_ORYSJ	Full=Myb-related protein Myb4	GO:0006351,GO:0006355,GO:0005634,GO:0003677	Solyc07g053240.2.1	Myb-related transcription factor IPR015495 Myb transcription factor
TR57008_c0_g3	0	1.241	10.521	7.928	6.87957e-06	0.000388708	Downregulated	RM02_ARATH	Full=60S ribosomal protein L2, mitochondrial	GO:0005739,GO:0003735,GO:0005840,GO:0006412	Solyc00g022110.2.1	Ribosomal protein L2 IPR002171 Ribosomal protein L2
TR58040_c0_g1	0	1.234	22.07	27.897	5.31394e-06	0.00031599	Downregulated	0	0	0	0	0
TR34200_c0_g1	0	1.234	6.886	7.568	0.000145715	0.00382717	Downregulated	YODA_ARATH	Full=Mitogen-activated protein kinase kinase kinase YODA	GO:0007346,GO:0010229,GO:0005737,GO:0032147,GO:0010098,GO:0010103,GO:0004709,GO:0005524,GO:0051403,GO:0042981,GO:0040008,GO:0000186	Solyc02g090430.2.1	Protein serine_threonine kinase IPR002290 Serine_threonine protein kinase
TR52823_c0_g2	0	1.227	42.529	33.537	8.53592e-09	2.17405e-06	Downregulated	NUD17_ARATH	Full=Nudix hydrolase 17, mitochondrial	GO:0005739,GO:0046872,GO:0016787	Solyc01g005390.2.1	Nudix hydrolase 4 IPR000086 NUDIX hydrolase domain
TR35313_c0_g1	0	1.227	10.214	12.111	2.978e-06	0.000199923	Downregulated	0	0	0	Solyc08g078060.2.1	Unknown Protein
TR36502_c0_g2	0	1.207	13.412	11.163	0.000130814	0.00350538	Downregulated	CRK26_ARATH	Full=Cysteine-rich receptor-like protein kinase 26	GO:0009755,GO:0046777,GO:0016021,GO:0031625,GO:0009506,GO:0001653,GO:0004675,GO:0005524,GO:0005886,GO:0007178	Solyc02g079990.2.1	RLK, Receptor like protein, putative resistance protein with an antifungal domain
TR51699_c0_g9	0	1.194	10.176	9.134	0.000397701	0.00826479	Downregulated	0	0	0	0	0
TR71972_c0_g1	0	1.187	8.205	6.949	0.000167185	0.00427594	Downregulated	0	0	0	0	0
TR14518_c0_g1	0	1.18	11.779	8.954	8.89099e-05	0.00262858	Downregulated	RLP12_ARATH	Full=Receptor-like protein 12	GO:0046777,GO:0009506,GO:0005886,GO:0016021,GO:0004672,GO:0009755	Solyc07g008630.1.1	LRR receptor-like serine_threonine-protein kinase, RLP
TR36502_c1_g2	0	1.18	8.228	7.497	0.000433614	0.0088037	Downregulated	CRK26_ARATH	Full=Cysteine-rich receptor-like protein kinase 26	GO:0005524,GO:0001653,GO:0004675,GO:0031625,GO:0016021,GO:0009506,GO:0005886,GO:0009755,GO:0007178,GO:0046777	Solyc02g080010.2.1	RLK, Receptor like protein, putative resistance protein with an antifungal domain
TR64688_c0_g1	0	1.173	15.636	14.352	2.31725e-05	0.000948223	Downregulated	0	0	0	Solyc01g081620.2.1	Vacuolar sorting protein IPR009291 Protein of unknown function DUF946, plant
TR60418_c0_g1	0	1.173	10.268	5.499	7.87078e-06	0.000423608	Downregulated	LEA14_SOYBN	Full=Desiccation protectant protein Lea14 homolog	GO:0009269	Solyc01g095140.2.1	Late embryogenesis abundant protein (Fragment) IPR013990 Water Stress and Hypersensitive response
TR8725_c0_g2	9.622	1.166	67.98	59.068	1.46458e-06	0.000113707	Downregulated	EF109_ARATH	Full=Ethylene-responsive transcription factor ERF109	GO:0009873,GO:0006351,GO:0005634,GO:0001944,GO:0003700,GO:0003677,GO:0051301,GO:0050832,GO:0010200	Solyc01g108240.2.1	Ethylene responsive transcription factor 2b IPR001471 Pathogenesis-related transcriptional factor and ERF, DNA-binding
TR27200_c0_g1	0	1.166	20.743	19.475	4.32137e-07	4.3981e-05	Downregulated	0	0	0	Solyc05g041910.2.1	Membrane protein IPR017214 Uncharacterised conserved protein UCP037471
TR7652_c0_g2	0	1.166	8.658	10.247	0.000434428	0.00881317	Downregulated	0	0	0	Solyc03g034410.1.1	cDNA clone J100026I16 full insert sequence
TR5868_c0_g1	0	1.16	7.323	7.105	0.000212726	0.00511734	Downregulated	LBD38_ARATH	Full=LOB domain-containing protein 38	0	Solyc01g107190.2.1	LOB domain protein 38 IPR004883 Lateral organ boundaries, LOB
TR11292_c1_g1	0	1.153	22.974	36.592	5.62035e-08	8.75411e-06	Downregulated	ACT5_DROME	Full=Actin-87E	GO:0005200,GO:0005524,GO:0007010,GO:0005737,GO:0005811,GO:0005884	Solyc10g080500.1.1	Actin IPR004000 Actin_actin-like
TR44238_c0_g1	5.646	1.146	18.933	18.817	0.000268157	0.00605191	Downregulated	0	0	0	0	0
TR30573_c0_g1	0	1.146	6.986	8.892	8.16883e-05	0.00246571	Downregulated	ILL6_ARATH	Full=IAA-amino acid hydrolase ILR1-like 6	GO:0010112,GO:0009694,GO:0009753,GO:1990206	Solyc10g079640.1.1	Iaa-amino acid hydrolase 9 IPR010168 Peptidase M20D, amidohydrolase
TR30613_c0_g1	0	1.139	11.242	12.307	6.06973e-07	5.65215e-05	Downregulated	0	0	0	0	0
TR10978_c0_g1	0	1.133	53.916	49.816	2.60992e-09	9.28563e-07	Downregulated	ZAT11_ARATH	Full=Zinc finger protein ZAT11	GO:0003700,GO:2000280,GO:0006355,GO:0071289,GO:0046872,GO:0010200,GO:0005634,GO:0006351	Solyc06g075780.1.1	Cys2_His2 zinc-finger transcription factor IPR007087 Zinc finger, C2H2-type
TR68113_c0_g1	0	1.133	14.102	12.127	7.19332e-06	0.0003998	Downregulated	0	0	0	0	0
TR9209_c0_g1	0	1.126	20.866	19.773	1.24311e-05	0.000596303	Downregulated	0	0	0	0	0
TR31121_c3_g2	0	1.126	16.395	12.009	2.47109e-06	0.000172455	Downregulated	YEMB_SCHPO	Full=UPF0664 stress-induced protein C29B12.11c	GO:0005829,GO:0005634	Solyc04g009190.2.1	WW domain-binding protein 2
TR8725_c1_g1	0	1.126	16.119	15.323	3.85205e-05	0.00140919	Downregulated	0	0	0	0	0
TR35834_c1_g7	0	1.119	12.661	15.308	2.77816e-05	0.00109451	Downregulated	C82C4_ARATH	Full=Cytochrome P450 82C4	GO:0016021,GO:0016020,GO:0071281,GO:0005506,GO:0098542,GO:0044550,GO:0004497,GO:0042343,GO:0016709,GO:0020037	Solyc09g059240.2.1	Cytochrome P450
TR33211_c0_g1	0	1.112	23.327	23.901	8.07608e-08	1.14999e-05	Downregulated	0	0	0	Solyc02g091250.1.1	Predicted by genscan and genefinder
TR51744_c0_g1	0	1.105	9.079	8.139	2.01951e-05	0.000855035	Downregulated	Y5625_ARATH	Full=B3 domain-containing protein At5g06250	GO:0010358,GO:0010073,GO:0006355,GO:0045892,GO:0005634,GO:0003677,GO:0003700,GO:0006351,GO:0048366	Solyc09g010230.1.1	Auxin response factor 24 IPR003340 Transcriptional factor B3
TR31886_c0_g1	0	1.099	12.845	9.604	0.000273145	0.00613832	Downregulated	0	0	0	0	0
TR45002_c0_g2	0	1.092	19.516	23.964	2.82933e-06	0.000191971	Downregulated	0	0	0	0	0
TR13495_c0_g1	0	1.085	10.475	8.312	0.00013888	0.00368114	Downregulated	PCO2_ARATH	Full=Plant cysteine oxidase 2 {ECO:0000303|PubMed:24599061}	GO:0005634,GO:0017172,GO:0001666,GO:0005829,GO:0046872,GO:0018171,GO:0070483	Solyc02g067440.2.1	Cupin RmlC-type IPR012864 Protein of unknown function DUF1637
TR29973_c0_g2	0	1.065	86.637	73.2	1.15082e-11	2.16043e-08	Downregulated	EF109_ARATH	Full=Ethylene-responsive transcription factor ERF109	GO:0009873,GO:0006351,GO:0005634,GO:0001944,GO:0003700,GO:0003677,GO:0051301,GO:0050832,GO:0010200	Solyc10g050970.1.1	Ethylene responsive transcription factor 2b IPR001471 Pathogenesis-related transcriptional factor and ERF, DNA-binding
TR65276_c0_g2	0	1.065	11.365	8.069	7.44701e-05	0.00232748	Downregulated	FB316_ARATH	Full=F-box protein At1g61340	0	Solyc02g079150.1.1	F-box family protein IPR001810 Cyclin-like F-box
TR10346_c1_g1	0	1.058	8.98	6.737	0.000195684	0.00478148	Downregulated	0	0	0	Solyc04g005730.2.1	Os12g0417000 protein (Fragment)
TR10656_c0_g1	0	1.058	5.92	8.907	0.000433375	0.0088037	Downregulated	EGC2_ARATH	Full=EG45-like domain containing protein 2	GO:0010230,GO:0009627,GO:0048046,GO:0005618	Solyc08g067390.2.1	Blight-associated protein P12 (Fragment) IPR007112 Expansin 45, endoglucanase-like
TR4205_c0_g1	0	1.051	10.529	14.14	6.99524e-06	0.000393594	Downregulated	0	0	0	Solyc12g019480.1.1	Formin 3 IPR015425 Actin-binding FH2
TR42803_c0_g2	0	1.051	7.04	10.129	0.000224409	0.00531385	Downregulated	WRK50_ARATH	Full=Probable WRKY transcription factor 50	GO:0006351,GO:0043565,GO:0009867,GO:0050832,GO:0005634,GO:0003700	Solyc08g062490.2.1	WRKY transcription factor 16 IPR003657 DNA-binding WRKY
TR66448_c0_g2	0	1.051	8.151	6.925	0.000198122	0.00482821	Downregulated	ACR1_ARATH	Full=ACT domain-containing protein ACR1 {ECO:0000305}	GO:0005634,GO:0016597,GO:0008152	Solyc02g092150.2.1	ACT domain-containing protein IPR002912 Amino acid-binding ACT
TR16725_c0_g2	0	1.044	27.875	17.407	7.41834e-06	0.000408253	Downregulated	POTEJ_HUMAN	Full=POTE ankyrin domain family member J	GO:0005615,GO:0001895,GO:0070062	Solyc04g071260.2.1	Actin IPR004000 Actin_actin-like
TR10902_c0_g2	0	1.044	9.532	8.265	3.42213e-06	0.000223593	Downregulated	Y1461_ARATH	Full=Probable serine/threonine-protein kinase At1g54610	GO:0004674,GO:0005524	Solyc07g053910.2.1	Cell division protein kinase 10 IPR002290 Serine_threonine protein kinase
TR40333_c0_g1	0	1.038	8.65	10.364	6.64375e-05	0.00213312	Downregulated	GUXC_FUSOX	Full=Putative exoglucanase type C	GO:0030245,GO:0016162,GO:0005576,GO:0030248	0	0
TR57205_c0_g1	0	1.031	28.787	26.549	9.03648e-08	1.27538e-05	Downregulated	0	0	0	0	0
TR44077_c0_g1	7.241	1.024	36.609	28.743	0.000128852	0.00347036	Downregulated	0	0	0	0	0
TR57205_c1_g1	0	1.01	26.793	26.573	1.38719e-08	2.99652e-06	Downregulated	SR4_PHYPO	Full=Spherulin-4	0	0	0
TR12979_c0_g1	0	1.01	23.074	25.946	3.00585e-09	1.02632e-06	Downregulated	CBHB_ASPFU	Full=Probable 1,4-beta-D-glucan cellobiohydrolase B	GO:0005576,GO:0016162,GO:0030248,GO:0030245	0	0
TR16197_c0_g1	0	0.997	11.733	16.318	8.2075e-06	0.000434368	Downregulated	WRK57_ARATH	Full=Probable WRKY transcription factor 57	GO:0006351,GO:0005634,GO:0009651,GO:0006970,GO:0003700,GO:0044212,GO:0009414,GO:0043565	Solyc05g012500.2.1	WRKY transcription factor 29 IPR003657 DNA-binding WRKY
TR13002_c0_g1	5.891	0.99	23.251	20.713	0.000222072	0.00528215	Downregulated	Y4103_ARATH	Full=Probable receptor-like protein kinase At4g10390	GO:0004674,GO:0005524,GO:0009611	Solyc12g005450.1.1	Receptor-like protein kinase At3g21340 IPR002290 Serine_threonine protein kinase
TR30601_c0_g2	0	0.983	38.173	41.442	2.96645e-10	1.88245e-07	Downregulated	DGP10_ARATH	Full=Protease Do-like 10, mitochondrial	GO:0005759,GO:0004252	Solyc11g008850.1.1	Serine protease IPR015724 Serine endopeptidase DegP2
TR52853_c0_g1	0	0.983	28.534	27.098	2.15765e-09	8.15644e-07	Downregulated	CNGC1_ARATH	Full=Cyclic nucleotide-gated ion channel 1	GO:0030552,GO:0005887,GO:0030553,GO:0005886,GO:0005216,GO:0042391,GO:0071805	Solyc01g095770.2.1	Cyclic nucleotide gated channel IPR000595 Cyclic nucleotide-binding
TR57060_c0_g1	5.916	0.977	41.555	34.673	5.24288e-06	0.00031235	Downregulated	0	0	0	0	0
TR27900_c0_g1	0	0.97	11.142	8.28	0.000212136	0.00511137	Downregulated	0	0	0	0	0
TR34918_c0_g2	0	0.956	7.247	5.648	0.000222735	0.00529397	Downregulated	0	0	0	0	0
TR45618_c0_g1	0	0.943	11.158	7.419	8.31905e-05	0.00249682	Downregulated	HFB2B_ARATH	Full=Heat stress transcription factor B-2b	GO:0043565,GO:0010200,GO:0045892,GO:0009408,GO:0003700,GO:0005634,GO:0006351	Solyc08g080540.2.1	Heat stress transcription factor-type, DNA-binding
TR28874_c0_g1	0	0.922	9.072	15.535	5.02095e-05	0.00172362	Downregulated	H2B_NEUCR	Full=Histone H2B	GO:0000786,GO:0003677,GO:0005634	Solyc11g007920.1.1	Histone H2B IPR000558 Histone H2B
TR4738_c2_g1	0	0.922	8.52	6.902	0.000318041	0.00693142	Downregulated	RLP12_ARATH	Full=Receptor-like protein 12	GO:0046777,GO:0009506,GO:0005886,GO:0016021,GO:0004672,GO:0009755	Solyc12g009530.1.1	LRR receptor-like serine_threonine-protein kinase, RLP
TR53509_c0_g1	72.975	0.909	0.314	0	4.12063e-05	0.00148184	Upregulated	C79B2_ARATH	Full=Tryptophan N-monooxygenase 1	GO:0052544,GO:0019761,GO:0009414,GO:0016709,GO:0016021,GO:0042742,GO:0006569,GO:0009684,GO:0009682,GO:0009617,GO:0016020,GO:0020037,GO:0006952,GO:0009625,GO:0005506,GO:0002229,GO:0010120	Solyc08g083450.1.1	cytochrome P450
TR23903_c0_g1	0	0.909	9.417	12.621	8.2767e-05	0.00248881	Downregulated	0	0	0	0	0
TR69257_c2_g3	0	0.909	12.292	9.636	2.49086e-05	0.00101015	Downregulated	0	0	0	0	0
TR66569_c0_g1	0	0.902	21.84	24.434	2.45048e-06	0.000171829	Downregulated	0	0	0	Solyc04g054340.1.1	Unknown Protein
TR69257_c4_g1	0	0.902	14.57	12.487	1.00824e-06	8.35918e-05	Downregulated	0	0	0	0	0
TR48554_c0_g1	0	0.902	5.368	6.424	3.16831e-05	0.00121359	Downregulated	GLR32_ARATH	Full=Glutamate receptor 3.2	GO:0070588,GO:0016021,GO:0019722,GO:0071230,GO:0006816,GO:0005886,GO:0008066,GO:0005622,GO:0005262,GO:0004970	Solyc04g082610.2.1	Glutamate-gated kainate-type ion channel receptor subunit GluR5 IPR017103 Ionotropic glutamate-like receptor, plant
TR39169_c0_g1	0	0.895	8.351	14.219	6.28809e-05	0.00204792	Downregulated	0	0	0	0	0
TR7349_c0_g1	0	0.888	32.407	38.739	6.37086e-11	7.41751e-08	Downregulated	LRX4_ARATH	Full=Leucine-rich repeat extensin-like protein 4	GO:0005199,GO:0009506,GO:0071555,GO:0009505,GO:0005576,GO:0005618	Solyc12g006980.1.1	Leucine-rich repeat receptor-like protein kinase PEPR2 IPR001611 Leucine-rich repeat
TR35884_c0_g1	0	0.888	5.56	5.264	0.000177698	0.00448539	Downregulated	C94B3_ARATH	Full=Cytochrome P450 94B3	GO:0048653,GO:0020037,GO:0009694,GO:0010154,GO:0009555,GO:0009611,GO:0048480,GO:0052694,GO:0016021,GO:0016705,GO:0005506,GO:0002213	Solyc02g094110.1.1	Cytochrome P450
TR69658_c0_g2	0	0.882	36.21	51.743	3.47364e-10	2.04263e-07	Downregulated	RCO3_NEUCR	Full=Probable glucose transporter rco-3	GO:0022891,GO:0016021,GO:0008643	Solyc01g008240.2.1	Solute carrier family 2, facilitated glucose transporter member 3 IPR003663 Sugar_inositol transporter
TR47215_c0_g1	0	0.882	8.105	8.296	0.000149654	0.00391441	Downregulated	RLK1_ARATH	Full=G-type lectin S-receptor-like serine/threonine-protein kinase RLK1	GO:0005886,GO:0005516,GO:0016021,GO:0005524,GO:0030246,GO:0004674	Solyc03g078360.1.1	Receptor-like protein kinase IPR002290 Serine_threonine protein kinase
TR939_c0_g1	0	0.875	19.125	12.777	1.52244e-05	0.000691532	Downregulated	ERF92_ARATH	Full=Ethylene-responsive transcription factor 1B	GO:0006952,GO:0009873,GO:0009867,GO:0003700,GO:0006351,GO:0003677,GO:0005634	Solyc09g089930.1.1	Ethylene responsive transcription factor 1a IPR001471 Pathogenesis-related transcriptional factor and ERF, DNA-binding
TR66824_c0_g2	0	0.875	8.082	11.461	0.000130174	0.00350005	Downregulated	0	0	0	0	0
TR35314_c0_g1	0	0.861	9.532	8.422	1.47329e-05	0.000674102	Downregulated	ERECT_ARATH	Full=LRR receptor-like serine/threonine-protein kinase ERECTA {ECO:0000303|PubMed:8624444}	GO:0009965,GO:0007178,GO:0005886,GO:0051302,GO:0001653,GO:0005739,GO:0048281,GO:0046777,GO:2000027,GO:0009944,GO:0042742,GO:0031625,GO:0030155,GO:0050832,GO:0001558,GO:0009755,GO:0009506,GO:0004675,GO:0005524,GO:0004674,GO:0001944,GO:0009664,GO:0010103,GO:0019199,GO:0010148,GO:0016021	Solyc07g008630.1.1	LRR receptor-like serine_threonine-protein kinase, RLP
TR71752_c3_g1	0	0.861	5.644	5.022	0.000306326	0.00673621	Downregulated	0	0	0	0	0
TR14010_c4_g3	0	0.854	10.605	9.377	0.000493291	0.00963694	Downregulated	0	0	0	0	0
TR1872_c4_g3	4.639	0.848	97.412	111.798	3.20571e-10	1.92707e-07	Downregulated	0	0	0	0	0
TR30681_c1_g1	0	0.848	13.926	14.885	3.25246e-06	0.000214271	Downregulated	0	0	0	0	0
TR48542_c0_g2	0	0.848	5.644	6.009	0.000159499	0.00411766	Downregulated	NU2M_ARATH	Full=NADH-ubiquinone oxidoreductase chain 2	GO:0042773,GO:0016021,GO:0008137,GO:0005743,GO:0070469	Solyc08g029260.1.1	NADH dehydrogenase subunit 2
TR62899_c0_g1	0	0.841	9.24	8.085	0.00024006	0.00558861	Downregulated	0	0	0	0	0
TR25020_c0_g2	0	0.834	15.82	12.613	9.36832e-05	0.00271921	Downregulated	DNJ10_ARATH	Full=Chaperone protein dnaJ 10	0	Solyc01g109890.2.1	Chaperone protein dnaJ 10 IPR003095 Heat shock protein DnaJ
TR8425_c0_g1	368.383	0.827	0.146	0	8.57176e-05	0.00255096	Upregulated	0	0	0	0	0
TR31981_c0_g1	0	0.821	11.625	14.908	1.10985e-05	0.000548944	Downregulated	AX10A_SOYBN	Full=Auxin-induced protein X10A	GO:0009734	Solyc08g079150.1.1	Auxin responsive SAUR protein IPR003676 Auxin responsive SAUR protein
TR19364_c1_g2	0	0.821	10.314	11.696	0.000229841	0.00539024	Downregulated	NIPA8_ARATH	Full=Probable magnesium transporter NIPA8	GO:0005886,GO:0015095,GO:0015693,GO:0005769,GO:0016021	Solyc01g086730.2.1	DUF803 domain membrane protein IPR008521 Protein of unknown function DUF803
TR28780_c0_g1	0	0.814	24.577	31.297	3.29739e-07	3.6356e-05	Downregulated	0	0	0	0	0
TR58815_c0_g1	0	0.807	8.29	12.346	0.000485729	0.00958294	Downregulated	0	0	0	0	0
TR56582_c0_g1	0	0.807	10.253	8.469	1.61707e-05	0.000727315	Downregulated	1A13_SOLLC	Full=1-aminocyclopropane-1-carboxylate synthase 3	GO:0009693,GO:0009835,GO:0016847,GO:0030170	Solyc02g091990.2.1	1-aminocyclopropane-1-carboxylate synthase IPR004839 Aminotransferase, class I and II IPR004838 Aminotransferases, class-I, pyridoxal-phosphate-binding site
TR64905_c0_g1	0	0.8	19.485	16.984	1.23764e-06	9.94937e-05	Downregulated	0	0	0	0	0
TR55240_c0_g1	0	0.793	7.231	6.487	0.000296949	0.00656637	Downregulated	LBD36_ARATH	Full=LOB domain-containing protein 36	GO:0006355,GO:0009954,GO:0048441,GO:0009965	Solyc02g065150.1.1	LOB domain family protein IPR004883 Lateral organ boundaries, LOB
TR11297_c0_g2	0	0.787	24.439	30.451	7.30223e-08	1.06855e-05	Downregulated	0	0	0	Solyc07g062700.2.1	Sodium_calcium exchanger family protein IPR004837 Sodium_calcium exchanger membrane region
TR16259_c0_g3	0	0.78	6.664	6.165	2.05597e-05	0.000868153	Downregulated	0	0	0	Solyc06g051370.1.1	Ycf2 IPR008543 Chloroplast Ycf2
TR62582_c0_g1	0	0.76	26.402	26.134	2.41499e-08	4.67595e-06	Downregulated	0	0	0	0	0
TR36130_c0_g1	0	0.76	12.2	9.33	8.10729e-05	0.00245674	Downregulated	0	0	0	0	0
TR34639_c0_g1	0	0.76	6.449	9.291	6.30812e-05	0.00205024	Downregulated	PGLRX_ASPFU	Full=Probable exopolygalacturonase X	GO:0004650,GO:0071555,GO:0047911,GO:0005576,GO:0045490	Solyc08g060970.2.1	Polygalacturonase IPR012334 Pectin lyase fold
TR4216_c0_g1	0	0.753	49.507	62.695	4.72086e-12	1.36278e-08	Downregulated	INDA1_HYPAT	Full=Amino-acid permease inda1	GO:0016021,GO:0015171	0	0
TR71786_c0_g1	0	0.746	11.756	8.837	4.17776e-05	0.00149057	Downregulated	NAC90_ARATH	Full=NAC domain-containing protein 90	GO:0006351,GO:0003677,GO:0005634,GO:0003700	Solyc11g068620.1.1	NAC-domain protein protein
TR69592_c0_g1	0	0.746	6.925	6.463	0.00038278	0.00804954	Downregulated	0	0	0	Solyc08g079480.2.1	Unknown Protein IPR009902 Protein of unknown function DUF1442
TR70523_c4_g2	0	0.739	6.357	6.471	0.000194949	0.00477656	Downregulated	0	0	0	0	0
TR8224_c0_g1	0	0.739	5.414	7.45	0.000123294	0.00336297	Downregulated	0	0	0	0	0
TR68435_c0_g1	0	0.732	4.877	3.933	0.000257156	0.00586982	Downregulated	GUN12_ORYSJ	Full=Endoglucanase 12	GO:0071555,GO:0016021,GO:0030245,GO:0008810	Solyc11g008820.1.1	Endoglucanase IPR001701 Glycoside hydrolase, family 9
TR53169_c0_g1	0	0.726	28.987	30.968	2.25623e-10	1.54429e-07	Downregulated	KARG_DROME	Full=Arginine kinase	GO:0016310,GO:0005886,GO:0005829,GO:0005737,GO:0005576,GO:0005524,GO:0004054	0	0
TR53177_c0_g1	0	0.726	20.973	22.593	1.07662e-08	2.53236e-06	Downregulated	0	0	0	Solyc01g081620.2.1	Vacuolar sorting protein IPR009291 Protein of unknown function DUF946, plant
TR13907_c0_g1	0	0.726	6.848	4.982	0.000437001	0.00883293	Downregulated	ATG8B_ORYSJ	Full=Autophagy-related protein 8B	GO:0005874,GO:0000421,GO:0015031,GO:0006914,GO:0033110	Solyc07g064680.2.1	Autophagy-related protein 8
TR71304_c0_g1	0	0.726	5.713	5.476	0.000491101	0.0096262	Downregulated	AHP4_ARATH	Full=Histidine-containing phosphotransfer protein 4	GO:0005737,GO:0005829,GO:0009736,GO:0005634,GO:0004871,GO:0000160	Solyc08g066350.1.1	Histidine phosphotransfer protein region
TR69257_c4_g3	0	0.726	5.736	4.865	0.000197876	0.00482593	Downregulated	0	0	0	0	0
TR28771_c0_g1	0	0.719	19.784	22.076	6.19237e-07	5.73273e-05	Downregulated	0	0	0	0	0
TR71272_c0_g3	0	0.719	8.75	11.046	7.73853e-06	0.000418619	Downregulated	RD21A_ARATH	Full=Cysteine proteinase RD21a	GO:0006508,GO:0005773,GO:0005764,GO:0009507,GO:0008233,GO:0009506,GO:0008234,GO:0005615,GO:0004197,GO:0051603,GO:0050832,GO:0048046	Solyc01g107760.2.1	Cathepsin B-like cysteine proteinase IPR013128 Peptidase C1A, papain
TR36864_c0_g1	0	0.705	42.943	42.899	9.5392e-11	1.00969e-07	Downregulated	AVT1_YEAST	Full=Vacuolar amino acid transporter 1	GO:0015188,GO:0000324,GO:0015803,GO:0000329,GO:0007034,GO:0015186,GO:0006868,GO:0003333,GO:1902475,GO:0098655,GO:0006865,GO:0015828,GO:0016021,GO:0015807,GO:0015804,GO:0006812,GO:0005302	Solyc03g013160.2.1	Amino acid transporter family protein IPR013057 Amino acid transporter, transmembrane
TR49916_c0_g1	0	0.699	22.568	24.904	3.34616e-07	3.6766e-05	Downregulated	TPS3_SOLLC	Full=(-)-camphene/tricyclene synthase, chloroplastic	GO:0050551,GO:0050552,GO:0016114,GO:0009507,GO:0000287	Solyc01g105870.2.1	(E)-beta-ocimene synthase IPR005630 Terpene synthase, metal-binding domain
TR24970_c0_g1	0	0.699	6.71	7.348	8.42835e-06	0.000442079	Downregulated	GPDL2_ARATH	Full=Glycerophosphodiester phosphodiesterase protein kinase domain-containing GDPDL2 {ECO:0000305}	GO:0006968,GO:0016021,GO:0004674,GO:0006629,GO:0006071,GO:0005524,GO:0005886,GO:0008889	Solyc02g081480.2.1	Receptor kinase IPR002290 Serine_threonine protein kinase
TR63800_c0_g1	0	0.692	18.956	20.541	5.1869e-08	8.31842e-06	Downregulated	MYB4_ORYSJ	Full=Myb-related protein Myb4	GO:0006351,GO:0006355,GO:0005634,GO:0003677	Solyc07g054960.1.1	Myb-related transcription factor IPR015495 Myb transcription factor
TR8390_c0_g1	0	0.692	12.829	18.684	4.152e-07	4.25299e-05	Downregulated	0	0	0	0	0
TR51905_c0_g1	0	0.692	7.231	9.369	4.29392e-05	0.00152175	Downregulated	SRG1_ARATH	Full=Protein SRG1	GO:0016706,GO:0016682,GO:0010260,GO:0046872	Solyc03g096050.2.1	1-aminocyclopropane-1-carboxylate oxidase 1 IPR005123 Oxoglutarate and iron-dependent oxygenase
TR29207_c0_g1	0	0.692	6.388	5.68	0.000226755	0.00533756	Downregulated	E70A1_ARATH	Full=Exocyst complex component EXO70A1	GO:0000145,GO:0005576,GO:0005886,GO:0005856,GO:0005618,GO:0005829,GO:0009524,GO:0006887	Solyc11g073010.1.1	Exocyst complex protein EXO70 IPR004140 Exo70 exocyst complex subunit
TR49593_c0_g1	0	0.692	4.363	3.478	0.000418323	0.00856444	Downregulated	SBT17_ARATH	Full=Subtilisin-like protease SBT1.7 {ECO:0000303|PubMed:16193095}	GO:0004252,GO:0048359,GO:0080001,GO:0005576,GO:0048046,GO:0005618,GO:0009505,GO:0010214	Solyc08g079850.1.1	Subtilisin-like protease IPR015500 Peptidase S8, subtilisin-related IPR000209 Peptidase S8 and S53, subtilisin, kexin, sedolisin
TR46067_c0_g1	0	0.685	7.76	13.498	0.000172165	0.00437354	Downregulated	TBA2_CHLRE	Full=Tubulin alpha-2 chain	GO:0005737,GO:0005200,GO:0051258,GO:0005525,GO:0007017,GO:0005874,GO:0003924	Solyc02g087880.2.1	Tubulin alpha-7 chain IPR002452 Alpha tubulin
TR16224_c0_g1	0	0.671	11.411	14.72	0.000125909	0.00340346	Downregulated	PLA14_ARATH	Full=Phospholipase A1-Ibeta2, chloroplastic	GO:0047714,GO:0016042,GO:0008970,GO:0004806,GO:0009507	Solyc06g060870.1.1	Lipase-like protein IPR002921 Lipase, class 3
TR60538_c0_g1	0	0.671	8.773	10.819	0.000332629	0.00716089	Downregulated	0	0	0	0	0
TR34911_c1_g2	0	0.671	5.583	7.113	8.2996e-06	0.000437923	Downregulated	RLP12_ARATH	Full=Receptor-like protein 12	GO:0046777,GO:0009506,GO:0005886,GO:0016021,GO:0004672,GO:0009755	Solyc01g098690.2.1	LRR receptor-like serine_threonine-protein kinase, RLP
TR5695_c0_g1	0	0.658	12.43	9.753	4.64624e-05	0.00160891	Downregulated	PAPI_STRMB	Full=Papain inhibitor {ECO:0000303|PubMed:21715969}	GO:0010466,GO:0004867,GO:0005615,GO:0004869,GO:0010951	0	0
TR53207_c1_g2	3.166	0.644	19.194	19.773	1.51009e-05	0.000686981	Downregulated	0	0	0	0	0
TR51751_c0_g1	0	0.644	10.644	8.915	4.11021e-05	0.00147977	Downregulated	0	0	0	0	0
TR64339_c0_g2	0	0.637	15.045	14.031	3.40478e-05	0.00128709	Downregulated	0	0	0	0	0
TR58019_c0_g1	0	0.637	8.911	13.999	2.74422e-06	0.000187398	Downregulated	PRTC_STRGR	Full=Streptogrisin-C	GO:0004553,GO:0005975,GO:0004252,GO:0030246,GO:0005576	0	0
TR47221_c0_g1	0	0.624	20.283	12.942	8.06525e-06	0.000431101	Downregulated	0	0	0	0	0
TR15522_c0_g1	0	0.617	23.994	30.349	4.02689e-08	6.85042e-06	Downregulated	0	0	0	0	0
TR54173_c0_g1	0	0.617	6.319	6.353	3.94519e-05	0.00143336	Downregulated	0	0	0	0	0
TR4609_c0_g1	2.332	0.61	31.716	32.354	4.72049e-08	7.76654e-06	Downregulated	EF1A1_DROME	Full=Elongation factor 1-alpha 1	GO:0005525,GO:0003924,GO:0003746,GO:0006414,GO:0005853,GO:0005875,GO:0008340,GO:0005829,GO:0005811	Solyc11g069700.1.1	Elongation factor 1-alpha IPR004539 Translation elongation factor EF1A, eukaryotic and archaeal
TR66795_c3_g2	0	0.61	34.201	41.105	3.35902e-09	1.09961e-06	Downregulated	PEXLP_TOBAC	Full=Pistil-specific extensin-like protein	GO:0005199	Solyc12g098780.1.1	Pistil extensin like protein (Fragment) IPR006041 Pollen Ole e 1 allergen and extensin
TR3686_c0_g1	0	0.61	12.783	8.915	0.000244391	0.00565215	Downregulated	0	0	0	0	0
TR2259_c1_g1	0	0.604	32.46	44.309	2.64636e-08	5.03189e-06	Downregulated	0	0	0	Solyc12g098760.1.1	Unknown Protein
TR62426_c0_g1	0	0.597	21.119	22.679	4.26058e-06	0.0002627	Downregulated	EGLD_EMENI	Full=Endo-beta-1,4-glucanase D	GO:0005576,GO:0008810,GO:0009251,GO:0030245,GO:0030248	0	0
TR56861_c0_g1	0	0.597	16.096	24.152	4.57324e-09	1.42563e-06	Downregulated	YLX5_SCHPO	Full=UNC93-like protein C922.05c	GO:0022857,GO:0005737,GO:0016021	Solyc03g080020.2.1	DUF895 domain membrane protein
TR13535_c0_g1	0	0.597	12.607	12.503	5.58911e-06	0.000331113	Downregulated	0	0	0	0	0
TR64312_c0_g1	0	0.597	7.254	11.391	0.00033977	0.00729483	Downregulated	0	0	0	0	0
TR2652_c0_g1	0	0.597	5.238	5.21	0.000215252	0.00516637	Downregulated	0	0	0	0	0
TR67227_c0_g1	0	0.597	4.271	4.364	0.000244771	0.00565269	Downregulated	MBD13_ARATH	Full=Methyl-CpG-binding domain-containing protein 13	GO:0006351,GO:0008327,GO:0005634,GO:0006355	Solyc08g080690.2.1	Methyl binding domain protein IPR001739 Methyl-CpG DNA binding
TR498_c0_g3	9.769	0.59	39.063	59.804	7.3876e-05	0.00231119	Downregulated	0	0	0	0	0
TR69257_c2_g1	0	0.59	15.59	10.545	1.38832e-05	0.00064926	Downregulated	0	0	0	0	0
TR67780_c0_g2	0	0.59	8.612	5.147	0.00046567	0.00928241	Downregulated	PME18_ARATH	Full=Bifunctional pectinesterase 18/rRNA N-glycosylase	GO:0005829,GO:0030598,GO:0005774,GO:0042545,GO:0031640,GO:0050832,GO:0045490,GO:0030599,GO:0005618,GO:0045330,GO:0009617,GO:0017148,GO:0004857,GO:0005576	Solyc02g080220.2.1	Pectinesterase IPR000070 Pectinesterase, catalytic
TR60435_c0_g1	0	0.583	12.967	11.782	5.90717e-06	0.000346082	Downregulated	YM67_CAEEL	Full=Putative serine protease K12H4.7	GO:0045087,GO:0008236	Solyc02g091950.2.1	Lysosomal Pro-X carboxypeptidase IPR008758 Peptidase S28
TR1933_c0_g2	0	0.583	8.175	7.599	0.000424801	0.0086691	Downregulated	0	0	0	0	0
TR24960_c0_g1	0	0.583	6.917	7.662	0.000226297	0.00533074	Downregulated	0	0	0	Solyc00g047190.1.1	Unknown Protein
TR47664_c0_g1	0	0.57	19.516	19.052	7.68633e-09	2.05311e-06	Downregulated	BH014_ARATH	Full=Transcription factor bHLH14	GO:0003677,GO:0005634,GO:0003700,GO:0006351,GO:0006355	Solyc08g083170.1.1	BHLH transcription factor IPR011598 Helix-loop-helix DNA-binding
TR57012_c0_g1	0	0.563	8.857	10.568	2.3748e-05	0.000968028	Downregulated	0	0	0	0	0
TR57230_c1_g2	0	0.563	9.056	8.657	6.32897e-05	0.00205281	Downregulated	0	0	0	Solyc06g064450.2.1	Cytoplasmic membrane protein
TR41994_c0_g1	0	0.563	6.925	11.485	0.000221834	0.00528215	Downregulated	PICP_PSESR	Full=Pseudomonalisin	GO:0046872,GO:0004252,GO:0042597	0	0
TR1860_c0_g3	0	0.563	4.862	6.197	0.000413921	0.00851513	Downregulated	0	0	0	Solyc06g068780.2.1	Protein kish-A IPR009653 Protein of unknown function DUF1242
TR55751_c0_g1	0	0.563	5.383	5.241	0.000332337	0.00715946	Downregulated	0	0	0	Solyc03g116030.2.1	E3 ubiquitin-protein ligase MARCH3 IPR011016 Zinc finger, RING-CH-type
TR57489_c0_g1	0	0.556	10.82	14.281	1.05314e-05	0.000528298	Downregulated	0	0	0	0	0
TR20298_c1_g1	0	0.556	10.843	9.73	5.07259e-06	0.000304196	Downregulated	0	0	0	0	0
TR29361_c0_g1	0	0.556	10.858	6.902	2.20407e-05	0.000908934	Downregulated	RHA2A_ARATH	Full=E3 ubiquitin-protein ligase RHA2A	GO:0004842,GO:0009738,GO:0016874,GO:0009651,GO:0005634,GO:0008270,GO:0016567,GO:0005737,GO:0009789,GO:0047484	Solyc04g007500.1.1	RING finger protein IPR018957 Zinc finger, C3HC4 RING-type
TR8222_c0_g1	0	0.556	7.346	11.532	6.47789e-05	0.00208408	Downregulated	0	0	0	Solyc02g089990.1.1	TMV response-related protein
TR1936_c0_g2	4.516	0.549	17.323	18.864	0.000217728	0.00520614	Downregulated	ADT2_RAT	Full=ADP/ATP translocase 2	GO:0007059,GO:0005215,GO:0005743,GO:0005634,GO:0008284,GO:0043209,GO:0042645,GO:0016021,GO:0055085,GO:0070062,GO:0044822,GO:0071817,GO:1901029	Solyc07g053830.2.1	Mitochondrial ADP_ATP carrier proteins IPR002113 Adenine nucleotide translocator 1
TR8293_c1_g1	0	0.549	25.865	28.751	1.82328e-08	3.73526e-06	Downregulated	HSP70_EMENI	Full=Heat shock 70 kDa protein	GO:0005622,GO:0005576,GO:0005524,GO:0071470,GO:0097308	Solyc03g117630.1.1	heat shock protein IPR013126 Heat shock protein 70
TR36533_c0_g1	0	0.549	3.29	4.27	0.000205583	0.00497946	Downregulated	SPT51_ARATH	Full=Putative transcription elongation factor SPT5 homolog 1	GO:0006351,GO:0005840,GO:0003735,GO:0005634,GO:0006357,GO:0006412,GO:0032784	Solyc11g008150.1.1	Transcription elongation factor spt5 IPR005100 Supt5 repeat
TR16251_c0_g1	0	0.543	42.498	63.604	1.39754e-10	1.13788e-07	Downregulated	0	0	0	0	0
TR55660_c0_g1	0	0.543	18.197	20.266	4.00291e-08	6.85042e-06	Downregulated	CDA_AMYRO	Full=Chitin deacetylase	GO:0004099,GO:0000272,GO:0006032	0	0
TR63765_c0_g2	0	0.543	16.188	14.258	8.18441e-07	7.10076e-05	Downregulated	MYB15_ANTMA	Full=Myb-related protein 315	GO:0005634,GO:0006351,GO:0006355,GO:0003677	Solyc03g093890.2.1	Myb-related transcription factor IPR015495 Myb transcription factor
TR35318_c0_g1	0	0.536	5.099	5.875	7.23156e-05	0.00227804	Downregulated	0	0	0	0	0
TR28347_c0_g1	0	0.529	20.858	29.808	3.80844e-07	4.0044e-05	Downregulated	MTND2_VITVI	Full=1,2-dihydroxy-3-keto-5-methylthiopentene dioxygenase 2 {ECO:0000255|HAMAP-Rule:MF_03154}	GO:0010309,GO:0046872,GO:0019509,GO:0005737,GO:0005634	Solyc09g082630.2.1	Acireductone dioxygenase IPR004313 Acireductone dioxygenase, ARD
TR9210_c0_g1	0	0.529	12.607	17.156	1.81735e-07	2.23553e-05	Downregulated	EP1G_DAUCA	Full=Epidermis-specific secreted glycoprotein EP1	GO:0030246,GO:0005576,GO:0006833	Solyc02g076830.1.1	S-locus-specific glycoprotein (Fragment) lectin
TR54669_c0_g1	0	0.529	7.086	9.691	0.000228232	0.00536042	Downregulated	0	0	0	0	0
TR19477_c0_g1	0	0.522	26.701	31.485	1.05717e-10	1.02767e-07	Downregulated	0	0	0	0	0
TR15320_c0_g1	0	0.522	25.237	30.325	5.56766e-08	8.75411e-06	Downregulated	0	0	0	0	0
TR57232_c0_g1	0	0.522	11.035	8.531	4.10849e-07	4.22204e-05	Downregulated	Y3264_ARATH	Full=Putative UPF0481 protein At3g02645	GO:0016021	Solyc03g117260.1.1	Pentatricopeptide (PPR) repeat-containing protein-like IPR004158 Protein of unknown function DUF247, plant
TR18987_c0_g1	0	0.522	8.75	5.962	4.67131e-05	0.00161407	Downregulated	PLA15_ARATH	Full=Phospholipase A1-Igamma1, chloroplastic	GO:0047714,GO:0016042,GO:0009507,GO:0008970,GO:0004806	Solyc08g022240.1.1	Lipase-like protein IPR002921 Lipase, class 3
TR58655_c0_g1	0	0.509	16.794	17.36	3.24734e-07	3.59289e-05	Downregulated	CUD2_SCHGR	Full=Endocuticle structural glycoprotein SgAbd-2	GO:0042302	0	0
TR39926_c0_g1	0	0.509	12.193	13.13	4.21886e-06	0.000260633	Downregulated	0	0	0	Solyc10g008640.2.1	Diacylglycerol kinase IPR016961 Diacylglycerol kinase, plant
TR25106_c0_g1	0	0.509	7.676	5.977	8.02398e-05	0.00244289	Downregulated	0	0	0	0	0
TR28936_c0_g1	0	0.509	5.621	7.591	0.000215991	0.00517629	Downregulated	0	0	0	0	0
TR63687_c0_g1	0	0.509	5.828	5.601	0.00012369	0.0033656	Downregulated	PLYB_EMENI	Full=Pectate lyase plyB	GO:0045490,GO:0071555,GO:0046872,GO:0030570,GO:0005576	Solyc02g080910.2.1	Pectate lyase family protein IPR002022 Pectate lyase_Amb allergen
TR15236_c0_g1	0	0.502	12.269	8.86	1.9675e-05	0.000835784	Downregulated	BH025_ARATH	Full=Transcription factor bHLH25	GO:0003700,GO:0006355,GO:0006351,GO:0005634,GO:0003677	Solyc02g091820.1.1	Transcription factor IPR011598 Helix-loop-helix DNA-binding
TR40105_c0_g3	0	0.502	8.711	11.626	2.49587e-07	2.87152e-05	Downregulated	PTR2_SCHPO	Full=Probable peptide transporter ptr2	GO:0035443,GO:0000324,GO:0071916,GO:0035442,GO:0015031,GO:0042937,GO:0032153,GO:0042936,GO:0005887,GO:0031520	Solyc09g014220.2.1	Peptide transporter IPR000109 TGF-beta receptor, type I_II extracellular region
TR4572_c0_g1	0	0.502	6.104	14.015	0.000519773	0.00999085	Downregulated	ATL18_ARATH	Full=RING-H2 finger protein ATL18	GO:0031225,GO:0008270,GO:0016021,GO:0016567	Solyc02g083660.1.1	RING finger protein IPR018957 Zinc finger, C3HC4 RING-type
TR55255_c0_g1	0	0.495	8.543	7.552	4.55398e-06	0.000275968	Downregulated	0	0	0	Solyc07g032350.1.1	Unknown Protein
TR5304_c0_g1	0	0.495	7.998	7.278	0.000190066	0.00467495	Downregulated	0	0	0	0	0
TR9540_c0_g1	0	0.495	4.762	9.785	0.000388995	0.00813712	Downregulated	0	0	0	Solyc11g006240.1.1	Unknown Protein
TR69257_c2_g4	0	0.488	14.048	16.953	6.64504e-06	0.000380192	Downregulated	0	0	0	0	0
TR50435_c0_g1	0	0.488	12.108	13.106	2.70732e-08	5.11715e-06	Downregulated	LACP_KLULA	Full=Lactose permease	GO:0016021,GO:0008643,GO:0015293,GO:0022891	Solyc07g024030.2.1	Solute carrier family 2, facilitated glucose transporter member 2 IPR003663 Sugar_inositol transporter
TR21405_c0_g1	0	0.488	6.986	5.586	2.00807e-05	0.000851324	Downregulated	DCR_ARATH	Full=BAHD acyltransferase DCR	GO:0010143,GO:0010090,GO:0005829,GO:0005737,GO:0016747,GO:0051179,GO:0090626	Solyc05g052680.1.1	Hydroxycinnamoyl transferase IPR003480 Transferase
TR21364_c0_g2	0	0.482	18.358	20.525	2.08347e-07	2.47504e-05	Downregulated	DRE1A_ARATH	Full=Dehydration-responsive element-binding protein 1A	GO:0009631,GO:0003677,GO:0009414,GO:0009409,GO:0006351,GO:0003700,GO:0005634	Solyc03g026280.2.1	CRT binding factor 2 IPR001471 Pathogenesis-related transcriptional factor and ERF, DNA-binding
TR16022_c0_g1	0	0.482	5.468	9.51	0.000172403	0.00437608	Downregulated	CPC1_NEUCR	Full=Cross-pathway control protein 1	GO:0043565,GO:0008652,GO:0003700,GO:0006351,GO:0005634	0	0
TR29208_c0_g1	0	0.475	14.838	21.763	2.38983e-07	2.76959e-05	Downregulated	EGLD_ASPOR	Full=Probable endo-beta-1,4-glucanase D	GO:0030248,GO:0030245,GO:0008810,GO:0005576	0	0
TR50421_c1_g1	0	0.475	8.082	7.599	0.000297557	0.00657203	Downregulated	0	0	0	0	0
TR55898_c0_g1	9.254	0.468	32.445	33.686	0.000118524	0.00326135	Downregulated	MLR_DROME	Full=Myosin regulatory light chain 2	GO:0060361,GO:0030239,GO:0005509,GO:0030016,GO:0003012,GO:0016459	Solyc03g098050.2.1	Calmodulin 3 protein IPR011992 EF-Hand type
TR65282_c0_g2	0	0.468	11.84	10.944	5.64538e-08	8.75411e-06	Downregulated	Y3028_ARATH	Full=Uncharacterized acetyltransferase At3g50280	GO:0016747	Solyc01g107080.2.1	Hydroxycinnamoyl transferase IPR003480 Transferase
TR63062_c0_g1	0	0.468	7.362	5.727	8.07275e-05	0.00245303	Downregulated	0	0	0	Solyc02g086460.2.1	Unknown Protein
TR66816_c0_g2	0	0.461	12.377	8.79	6.87489e-08	1.02012e-05	Downregulated	TGT3A_ARATH	Full=Trihelix transcription factor GT-3a	GO:0003700,GO:0006351,GO:0042802,GO:0005634,GO:0006355,GO:0043565	Solyc09g005560.2.1	Zinc finger and SCAN domain containing 29 (Predicted) IPR017877 MYB-like
TR61295_c1_g3	0	0.461	8.175	6.471	2.97646e-05	0.00115544	Downregulated	ESYT2_MOUSE	Full=Extended synaptotagmin-2	GO:0035091,GO:0005544,GO:0005543,GO:0005509,GO:0005887,GO:0031234,GO:0005783,GO:0031210,GO:0006869,GO:0031227,GO:0006897,GO:0016020,GO:0008429,GO:0042802,GO:0044232	Solyc04g008620.2.1	Integral membrane single C2 domain protein IPR018029 C2 membrane targeting protein
TR71247_c0_g1	0	0.461	3.267	5.57	0.000223009	0.00529651	Downregulated	ACA12_ARATH	Full=Calcium-transporting ATPase 12, plasma membrane-type	GO:0005388,GO:0005524,GO:0016021,GO:0046872	Solyc02g090560.2.1	Calcium-transporting ATPase 1 IPR001757 ATPase, P-type, K_Mg_Cd_Cu_Zn_Na_Ca_Na_H-transporter
TR56062_c0_g1	0	0.448	35.704	19.757	3.87352e-08	6.79557e-06	Downregulated	0	0	0	0	0
TR4598_c0_g1	0	0.448	22.744	27.983	2.76333e-08	5.13584e-06	Downregulated	0	0	0	0	0
TR65793_c0_g2	0	0.448	16.472	14.117	7.97005e-08	1.14e-05	Downregulated	0	0	0	0	0
TR58646_c0_g2	0	0.448	8.228	11.68	6.67583e-05	0.00214125	Downregulated	MLC1_DROVI	Full=Myosin light chain alkali	GO:0005859,GO:0005509	Solyc01g008950.2.1	Calmodulin 5_6_7_8-like protein IPR011992 EF-Hand type
TR15780_c0_g1	0	0.448	8.435	9.307	2.84599e-06	0.00019228	Downregulated	ACBP4_ARATH	Full=Acyl-CoA-binding domain-containing protein 4	GO:0008289,GO:0006810,GO:0006869,GO:0005634,GO:0009753,GO:0009416,GO:0000062,GO:0005829,GO:0005737,GO:0009723	Solyc03g114960.2.1	Kelch-like protein 20 IPR015915 Kelch-type beta propeller
TR58000_c0_g1	0	0.448	8.382	10.717	0.000347778	0.00743599	Downregulated	EF1A_PODCU	Full=Elongation factor 1-alpha	GO:0005737,GO:0003746,GO:0005525,GO:0003924	Solyc11g069700.1.1	Elongation factor 1-alpha IPR004539 Translation elongation factor EF1A, eukaryotic and archaeal
TR14478_c0_g1	0	0.448	6.602	5.264	7.79153e-05	0.00240384	Downregulated	CYSP3_DICDI	Full=Cysteine proteinase 3	GO:0051603,GO:0004197,GO:0005615,GO:0005764	Solyc03g111730.2.1	Cathepsin B-like cysteine proteinase IPR013128 Peptidase C1A, papain
TR498_c0_g1	7.266	0.441	42.928	55.464	5.60633e-06	0.000331515	Downregulated	0	0	0	0	0
TR18602_c0_g2	0	0.441	24.508	28.053	1.36542e-10	1.13788e-07	Downregulated	HEX1_NEUCR	Full=Woronin body major protein	GO:0043022,GO:0006452,GO:0005777,GO:0045905,GO:0003746,GO:0045901	Solyc07g005560.2.1	Eukaryotic translation initiation factor 5A IPR019769 Translation elongation factor, IF5A, hypusine site
TR44205_c0_g1	0	0.441	14.639	16.365	9.25061e-07	7.83317e-05	Downregulated	RS2_DROME	Full=40S ribosomal protein S2	GO:0048477,GO:0007275,GO:0005840,GO:0005730,GO:0003723,GO:0006412,GO:0003735,GO:0000228,GO:0005737,GO:0015935	Solyc04g074300.2.1	30S ribosomal protein S5 IPR005711 Ribosomal protein S5, eukaryotic_archaeal
TR8890_c0_g1	0	0.441	11.25	11.015	4.53295e-05	0.00158523	Downregulated	0	0	0	0	0
TR51564_c0_g1	0	0.441	5.552	7.027	0.000243741	0.00564123	Downregulated	0	0	0	Solyc03g122190.2.1	Jasmonate ZIM domain 2 IPR010399 Tify
TR66524_c0_g1	0	0.441	4.133	3.588	0.000244767	0.00565269	Downregulated	0	0	0	0	0
TR71571_c0_g1	0	0.441	2.738	2.899	0.000482043	0.00953101	Downregulated	RGA2_SOLBU	Full=Disease resistance protein RGA2	GO:0043531,GO:0006952,GO:0005524	Solyc04g015630.2.1	Nbs-lrr, resistance protein
TR58434_c0_g1	7.094	0.434	28.879	31.485	0.00014359	0.00379331	Downregulated	0	0	0	0	0
TR10987_c0_g1	0	0.434	21.203	19.569	3.25536e-09	1.08811e-06	Downregulated	0	0	0	0	0
TR19693_c0_g1	0	0.434	7.415	5.413	3.64372e-05	0.00135483	Downregulated	BH093_ARATH	Full=Transcription factor bHLH93	GO:0006351,GO:0005634,GO:0007275,GO:0003700,GO:0003677	Solyc12g088130.1.1	BHLH transcription factor IPR011598 Helix-loop-helix DNA-binding
TR14556_c0_g1	0	0.434	3.474	3.517	0.000487259	0.00960424	Downregulated	0	0	0	0	0
TR69257_c4_g5	0	0.427	10.107	13.083	3.11248e-05	0.00119944	Downregulated	0	0	0	0	0
TR35596_c3_g2	0	0.427	8.52	8.531	6.62303e-07	6.02601e-05	Downregulated	0	0	0	Solyc01g107740.2.1	Protein unc-13 homolog C IPR018029 C2 membrane targeting protein
TR1810_c0_g1	0	0.427	6.948	5.319	0.000172908	0.0043819	Downregulated	ASP6_CAEEL	Full=Aspartic protease 6	GO:0006508,GO:0030163,GO:0005615,GO:0005764,GO:0004190	Solyc02g032940.2.1	Aspartic proteinase IPR001461 Peptidase A1
TR42774_c0_g1	0	0.427	5.368	5.194	0.000227318	0.00534685	Downregulated	LOR11_ARATH	Full=Protein LURP-one-related 11	0	Solyc00g100880.2.1	GTP binding protein IPR007612 Protein of unknown function DUF567
TR32901_c0_g1	0	0.42	32.629	35.942	1.06799e-10	1.02767e-07	Downregulated	CRF1_ASPFU	Full=Probable glycosidase crf1	GO:0019863,GO:0005886,GO:0009277,GO:0005975,GO:0004553,GO:0005576,GO:0031225,GO:0071555	Solyc12g098610.1.1	Xyloglucan endotransglucosylase_hydrolase 8 IPR016455 Xyloglucan endotransglucosylase_hydrolase
TR66957_c0_g1	0	0.42	24.217	26.353	4.74382e-10	2.73882e-07	Downregulated	TBA_TETTH	Full=Tubulin alpha chain	GO:0005525,GO:0003924,GO:0005200,GO:0005874,GO:0051258,GO:0005737,GO:0007017	Solyc04g077020.2.1	Tubulin alpha-3 chain IPR002452 Alpha tubulin
TR15150_c2_g1	0	0.42	9.148	9.268	0.000234881	0.00550031	Downregulated	0	0	0	0	0
TR15831_c1_g1	0	0.42	4.386	7.34	0.000303054	0.00667714	Downregulated	UBC1_COLGL	Full=Ubiquitin-conjugating enzyme E2-16 kDa	GO:0016874,GO:0016567,GO:0005524	Solyc07g066080.2.1	Ubiquitin-conjugating enzyme E2 10 IPR000608 Ubiquitin-conjugating enzyme, E2
TR1584_c0_g1	0	0.414	10.582	10.921	8.52903e-05	0.00254063	Downregulated	0	0	0	Solyc12g009860.1.1	Unknown Protein
TR41581_c0_g1	0	0.414	6.787	5.46	5.15534e-05	0.00175835	Downregulated	0	0	0	Solyc05g017920.1.1	Unknown Protein
TR63488_c0_g1	0	0.407	9.332	11.955	4.43341e-05	0.00156074	Downregulated	YKJ2_CAEEL	Full=GILT-like protein C02D5.2	GO:0016021	Solyc06g007330.2.1	Gamma-interferon-inducible lysosomal thiol reductase IPR004911 Gamma interferon inducible lysosomal thiol reductase GILT
TR71960_c0_g1	0	0.407	7.193	5.64	9.7118e-05	0.00278832	Downregulated	CCU41_ARATH	Full=Cyclin-U4-1	GO:0007049,GO:0051301	Solyc03g093790.2.1	Cyclin-like IPR012389 Negative regulatory factor PREG
TR2605_c0_g1	2.455	0.4	13.619	14.798	2.09374e-05	0.000879425	Downregulated	ALOX1_PICPG	Full=Alcohol oxidase 1	GO:0050660,GO:0047639,GO:0046188,GO:0015945,GO:0005782	0	0
TR71927_c0_g1	0	0.4	7.676	5.883	0.000338188	0.00726579	Downregulated	0	0	0	Solyc04g076970.2.1	BZIP transcription factor
TR43895_c1_g3	0	0.393	20.245	19.185	9.49883e-09	2.33332e-06	Downregulated	TBB_TETTH	Full=Tubulin beta chain	GO:0003924,GO:0005200,GO:0005525,GO:0005874,GO:0005737,GO:0007017,GO:0051258	Solyc06g035970.2.1	Tubulin beta chain IPR002453 Beta tubulin
TR26467_c0_g1	0	0.393	13.696	7.818	0.000271814	0.00611272	Downregulated	0	0	0	0	0
TR3380_c0_g2	0	0.393	8.213	8.163	1.72544e-05	0.000762023	Downregulated	0	0	0	0	0
TR12052_c0_g1	0	0.393	7.791	4.763	0.000248455	0.00572018	Downregulated	PLYE_NEOFI	Full=Probable pectate lyase E	GO:0030570,GO:0071555,GO:0005576,GO:0000272	0	0
TR16226_c0_g2	0	0.393	5.069	4.849	0.000185624	0.00461936	Downregulated	0	0	0	0	0
TR34081_c0_g1	0	0.387	6.035	5.531	9.74337e-05	0.00279234	Downregulated	0	0	0	0	0
TR37277_c0_g1	0	0.38	17.515	22.664	2.77998e-06	0.000189432	Downregulated	0	0	0	0	0
TR53466_c0_g1	0	0.38	13.772	25.186	1.12545e-05	0.00055493	Downregulated	SUBF_BACSU	Full=Bacillopeptidase F	GO:0004252,GO:0005576	0	0
TR24715_c0_g1	0	0.38	14.018	18.41	7.40076e-08	1.078e-05	Downregulated	RLA0_CERCA	Full=60S acidic ribosomal protein P0	GO:0042254,GO:0005840	Solyc09g091520.1.1	60S acidic ribosomal protein P0 IPR001790 Ribosomal protein L10
TR24708_c0_g1	0	0.38	7.339	8.374	0.000435785	0.00882212	Downregulated	AROD6_ARATH	Full=Arogenate dehydratase/prephenate dehydratase 6, chloroplastic	GO:0009094,GO:0004664,GO:0009507,GO:0047769,GO:0016597,GO:0009570	Solyc11g066890.1.1	Prephenate dehydratase IPR001086 Prephenate dehydratase
TR24572_c0_g1	0	0.373	15.935	16.545	9.71724e-09	2.3508e-06	Downregulated	GUN4_HYPJE	Full=Endoglucanase-4	GO:0030248,GO:0008810,GO:0005576,GO:0030245	0	0
TR45192_c0_g1	0	0.366	14.256	12.785	1.56256e-05	0.000706803	Downregulated	TPS3_SOLLC	Full=(-)-camphene/tricyclene synthase, chloroplastic	GO:0050551,GO:0050552,GO:0016114,GO:0009507,GO:0000287	Solyc01g105890.2.1	(E)-beta-ocimene synthase IPR005630 Terpene synthase, metal-binding domain
TR66270_c0_g3	0	0.366	8.036	6.377	0.000111067	0.00309371	Downregulated	0	0	0	0	0
TR68454_c0_g1	0	0.366	4.57	3.541	0.000144652	0.00380553	Downregulated	0	0	0	0	0
TR31666_c0_g1	0	0.366	4.103	3.862	0.000183137	0.00458622	Downregulated	0	0	0	0	0
TR18605_c0_g1	0	0.366	3.642	4.505	0.000196125	0.0047869	Downregulated	CCMFC_ARATH	Full=Cytochrome c biogenesis CcmF C-terminal-like mitochondrial protein {ECO:0000305}	GO:0017004,GO:0016021,GO:0005743,GO:0006810	Solyc11g039360.1.1	Cytochrome c biogenesis FC
TR67811_c0_g1	0	0.359	25.129	30.928	3.8289e-07	4.0044e-05	Downregulated	0	0	0	0	0
TR1873_c0_g1	0	0.359	12.254	13.968	1.90137e-05	0.000816995	Downregulated	0	0	0	0	0
TR3714_c0_g1	0	0.359	9.678	12.15	1.15527e-05	0.000566117	Downregulated	GUNK_FUSOX	Full=Putative endoglucanase type K	GO:0030248,GO:0030245,GO:0005576,GO:0008810	0	0
TR35846_c1_g1	8.738	0.353	83.302	97.008	1.94909e-07	2.35091e-05	Downregulated	0	0	0	0	0
TR54177_c2_g2	0	0.353	7.714	8.077	3.61609e-06	0.000231971	Downregulated	0	0	0	Solyc04g008620.2.1	Integral membrane single C2 domain protein IPR018029 C2 membrane targeting protein
TR32366_c0_g1	0	0.353	6.971	6.69	0.000116434	0.00320942	Downregulated	0	0	0	0	0
TR37775_c0_g2	0	0.353	5.391	7.771	0.000235172	0.00550307	Downregulated	0	0	0	0	0
TR67568_c0_g1	0	0.346	12.461	13.678	1.52469e-05	0.000691532	Downregulated	0	0	0	0	0
TR9199_c0_g1	0	0.346	7.178	9.51	2.69996e-05	0.00106901	Downregulated	0	0	0	0	0
TR30682_c0_g1	0	0.346	5.79	5.053	0.000148006	0.00387452	Downregulated	0	0	0	0	0
TR21953_c0_g1	1.694	0.339	9.954	9.228	6.39236e-05	0.00206914	Downregulated	YEW0_YEAST	Full=Zinc finger protein YER130C	GO:0003677,GO:0005634,GO:0046872	0	0
TR71376_c0_g1	0	0.339	13.634	5.915	0.000316643	0.00691044	Downregulated	0	0	0	0	0
TR46852_c0_g1	0	0.339	7.293	5.586	4.59225e-05	0.00159884	Downregulated	DJ1_DICDI	Full=Protein DJ-1 homolog	0	0	0
TR48624_c0_g1	0	0.339	3.052	6.244	0.000372698	0.00787403	Downregulated	0	0	0	Solyc01g095240.2.1	Unknown Protein
TR68836_c0_g1	0	0.339	3.988	3.815	5.77803e-05	0.0019192	Downregulated	NU98A_ARATH	Full=Nuclear pore complex protein NUP98A {ECO:0000303|PubMed:21189294}	GO:0005635,GO:0051028,GO:0015031,GO:0005643	Solyc02g093330.2.1	Nup98 (Fragment) IPR007230 Peptidase S59, nucleoporin
TR67383_c0_g1	0	0.339	3.282	4.912	9.75802e-05	0.00279401	Downregulated	MAL11_YEAST	Full=General alpha-glucoside permease	GO:0000023,GO:0005364,GO:0000017,GO:0005352,GO:0005886,GO:0015768,GO:0015574,GO:0016021,GO:0015771,GO:0046352	Solyc12g010690.1.1	Solute carrier family 2, facilitated glucose transporter member 1 IPR003663 Sugar_inositol transporter
TR11134_c0_g1	0	0.339	3.688	3.666	3.05117e-05	0.00118011	Downregulated	0	0	0	Solyc07g025280.1.1	Zinc knuckle family protein
TR64927_c0_g1	0	0.332	16.004	23.854	3.10799e-06	0.000207334	Downregulated	0	0	0	Solyc07g008430.1.1	Unknown Protein
TR39523_c0_g1	0	0.326	15.291	11.868	4.46302e-07	4.51334e-05	Downregulated	SUN1_ASPFU	Full=Secreted beta-glucosidase sun1	GO:0005576,GO:0071555,GO:0030448,GO:0030246,GO:0016798,GO:0006076,GO:0005618	0	0
TR24912_c0_g1	0	0.326	11.181	16.49	1.71532e-06	0.00012872	Downregulated	0	0	0	0	0
TR27955_c0_g1	0	0.326	8.412	5.186	8.85428e-05	0.00262275	Downregulated	0	0	0	0	0
TR65204_c0_g1	0	0.326	5.958	3.839	0.000271131	0.00610602	Downregulated	TNNI_DROME	Full=Troponin I	GO:0046872,GO:0045214,GO:0030239,GO:0007519,GO:0046716,GO:0007517,GO:0000280,GO:0007399,GO:0005861,GO:0003779,GO:0007507,GO:0048738,GO:0060047	0	0
TR60854_c0_g1	0	0.319	10.904	13.835	1.4496e-05	0.000666144	Downregulated	OYEA_SCHPO	Full=Putative NADPH dehydrogenase C5H10.04	GO:0052690,GO:0010181,GO:0018548,GO:0003959,GO:0005829,GO:0005634	Solyc11g032130.1.1	NADPH dehydrogenase 3 IPR001155 NADH:flavin oxidoreductase_NADH oxidase, N-terminal
TR42693_c0_g1	0	0.319	9.685	10.482	6.16283e-05	0.00201539	Downregulated	0	0	0	Solyc01g065530.2.1	COBRA-like protein IPR006918 Glycosyl-phosphatidyl inositol-anchored, plant
TR21407_c0_g1	0	0.319	5.552	5.006	1.79438e-05	0.000784833	Downregulated	PNC1_ARATH	Full=Peroxisomal adenine nucleotide carrier 1	GO:0005347,GO:0005778,GO:0015217,GO:0016021,GO:0005777,GO:0015867,GO:0015866,GO:0080024,GO:0015297,GO:0006635	Solyc01g098910.2.1	Mitochondrial carrier protein IPR001993 Mitochondrial substrate carrier
TR60353_c1_g1	0	0.312	22.537	28.163	2.51483e-07	2.88289e-05	Downregulated	G3P_PODAS	Full=Glyceraldehyde-3-phosphate dehydrogenase	GO:0005737,GO:0051287,GO:0050661,GO:0006096,GO:0004365,GO:0006006	Solyc10g005510.2.1	Glyceraldehyde-3-phosphate dehydrogenase IPR000173 Glyceraldehyde 3-phosphate dehydrogenase
TR39944_c0_g1	0	0.312	20.942	27.474	3.49169e-09	1.11995e-06	Downregulated	0	0	0	0	0
TR1839_c0_g1	0	0.312	11.265	10.936	7.72353e-07	6.8473e-05	Downregulated	0	0	0	0	0
TR65186_c0_g1	0	0.312	11.319	10.153	6.03898e-08	9.17521e-06	Downregulated	0	0	0	0	0
TR16387_c0_g1	0	0.312	7.592	11.806	1.27111e-05	0.000606047	Downregulated	0	0	0	0	0
TR54458_c0_g1	0	0.312	7.408	8.617	9.09424e-06	0.00047109	Downregulated	CBPA1_ANOGA	Full=Zinc carboxypeptidase A 1	GO:0006508,GO:0007586,GO:0005615,GO:0004181,GO:0008270	Solyc04g082340.2.1	Carboxypeptidase B IPR000834 Peptidase M14, carboxypeptidase A
TR18740_c0_g1	0	0.305	4.279	5.147	0.000435851	0.00882212	Downregulated	0	0	0	0	0
TR65284_c0_g1	0	0.298	21.771	23.416	1.02349e-10	1.02767e-07	Downregulated	S28A3_EPTST	Full=Solute carrier family 28 member 3	GO:0005415,GO:0005887	0	0
TR44829_c0_g3	0	0.298	7.086	8.508	9.09832e-05	0.00267685	Downregulated	CUH1C_TENMO	Full=Larval/pupal cuticle protein H1C	GO:0042302	0	0
TR53558_c0_g1	0	0.298	6.434	6.079	6.42036e-05	0.00207187	Downregulated	GSEP_BACLD	Full=Glutamyl endopeptidase	GO:0005576,GO:0004252	0	0
TR42677_c0_g1	0	0.298	5.122	5.711	2.34129e-05	0.000956337	Downregulated	RPK1_IPONI	Full=Receptor-like protein kinase	GO:0005576,GO:0019199,GO:0005524,GO:0004674,GO:0016021,GO:0006468,GO:0005886	Solyc03g123860.2.1	Receptor like kinase, RLK
TR16485_c0_g1	0	0.298	5.859	4.332	0.000277023	0.00620351	Downregulated	0	0	0	0	0
TR16185_c0_g1	0	0.292	13.765	19.992	1.76503e-06	0.000131257	Downregulated	PGSC2_DROSI	Full=Peptidoglycan-recognition protein SC2	GO:0005576,GO:0045087,GO:0009253,GO:0008745,GO:0008270	0	0
TR7812_c0_g1	0	0.292	13.435	13.185	1.2011e-07	1.60251e-05	Downregulated	0	0	0	0	0
TR53191_c1_g2	0	0.292	8.857	14.979	4.49138e-06	0.000274268	Downregulated	YIZG_SCHPO	Full=Uncharacterized transporter C1002.16c	GO:0051286,GO:0016021,GO:0035353,GO:0015663,GO:0005794,GO:0015890,GO:0005887,GO:0032153,GO:1903222	Solyc00g034000.1.1	Permease of the major facilitator superfamily IPR016196 Major facilitator superfamily, general substrate transporter
TR31833_c0_g1	0	0.292	5.544	6.142	1.03966e-05	0.000524019	Downregulated	FRAY2_DICDI	Full=Serine/threonine-protein kinase fray2 {ECO:0000250|UniProtKB:O61125, ECO:0000312|EMBL:EAL69242.1}	GO:0046872,GO:0005524,GO:0004674	Solyc02g086790.2.1	Serine_threonine protein kinase IPR002290 Serine_threonine protein kinase
TR29430_c0_g2	0	0.292	5.951	5.586	9.29834e-05	0.00270398	Downregulated	SUI1_YEAST	Full=Eukaryotic translation initiation factor eIF-1	GO:0043024,GO:0031369,GO:1990145,GO:0043614,GO:0016282,GO:0003743,GO:0006417,GO:0001731	Solyc10g006470.2.1	Translation initiation factor SUI1 IPR005874 Eukaryotic translation initiation factor SUI1
TR66484_c1_g1	0	0.285	7.707	11.876	1.89149e-05	0.000813855	Downregulated	HS901_ARATH	Full=Heat shock protein 90-1	GO:0005524,GO:0009816,GO:0005737,GO:0006457	Solyc07g065840.2.1	Heat shock protein 90 IPR003594 ATP-binding region, ATPase-like IPR001404 Heat shock protein Hsp90
TR67787_c0_g1	0	0.285	7.185	7.904	5.80544e-07	5.4702e-05	Downregulated	QUTD_EMENI	Full=Quinate permease	GO:0022891,GO:0019630,GO:0016021,GO:0005886	Solyc09g075820.2.1	Solute carrier family 2, facilitated glucose transporter member 3 IPR003663 Sugar_inositol transporter
TR15655_c0_g1	0	0.285	5.452	5.821	9.25489e-05	0.0027011	Downregulated	0	0	0	Solyc06g005300.2.1	UPA23 IPR012862 Protein of unknown function DUF1635
TR68834_c0_g1	0	0.285	5.92	4.661	6.30713e-06	0.000364139	Downregulated	YODA_ARATH	Full=Mitogen-activated protein kinase kinase kinase YODA	GO:0007346,GO:0010229,GO:0005737,GO:0032147,GO:0010098,GO:0010103,GO:0004709,GO:0005524,GO:0051403,GO:0042981,GO:0040008,GO:0000186	Solyc11g006000.1.1	Protein serine_threonine kinase IPR015748 Mitogen activated protein kinase kinase kinase 3
TR13415_c0_g1	0	0.278	13.121	17.744	2.46256e-09	8.88591e-07	Downregulated	PCKA_NEUCR	Full=Phosphoenolpyruvate carboxykinase [ATP]	GO:0004612,GO:0006094,GO:0005524	Solyc04g076880.2.1	Phosphoenolpyruvate carboxykinase IPR001272 Phosphoenolpyruvate carboxykinase, ATP-utilising
TR10107_c0_g1	0	0.278	18.059	23.525	2.0889e-07	2.47504e-05	Downregulated	TBA1_DROME	Full=Tubulin alpha-1 chain	GO:0005634,GO:0000235,GO:0003924,GO:0005525,GO:0048471,GO:0005200,GO:0005813,GO:0005737,GO:0019730,GO:0005819,GO:0007094,GO:0007052,GO:0005874,GO:0051258	Solyc04g077020.2.1	Tubulin alpha-3 chain IPR002452 Alpha tubulin
TR71803_c0_g1	0	0.278	7.776	5.695	7.12078e-05	0.00226023	Downregulated	0	0	0	0	0
TR56566_c0_g1	0	0.278	6.71	6.549	2.25944e-05	0.000928153	Downregulated	0	0	0	0	0
TR15483_c0_g1	0	0.278	3.55	4.058	0.000429582	0.00874419	Downregulated	0	0	0	0	0
TR52807_c1_g1	0	0.271	19.386	15.065	9.35668e-08	1.29743e-05	Downregulated	TPM2_DROME	Full=Tropomyosin-2	GO:0003779,GO:0007507	0	0
TR33237_c0_g2	0	0.271	8.128	9.471	2.39868e-08	4.67286e-06	Downregulated	RPN4_CANAL	Full=Transcriptional regulator RPN4	GO:0003700,GO:0043161,GO:0043565,GO:0006357,GO:0046872,GO:0006351,GO:0005634	0	0
TR34672_c0_g2	0	0.271	8.221	9.197	5.76107e-08	8.80508e-06	Downregulated	HS71B_BOVIN	Full=Heat shock 70 kDa protein 1B	GO:0005524	Solyc11g066100.1.1	heat shock protein IPR013126 Heat shock protein 70
TR64413_c0_g1	0	0.264	8.604	7.622	8.11402e-05	0.00245674	Downregulated	C82C4_ARATH	Full=Cytochrome P450 82C4	GO:0016021,GO:0016020,GO:0071281,GO:0005506,GO:0098542,GO:0044550,GO:0004497,GO:0042343,GO:0016709,GO:0020037	Solyc09g059240.2.1	Cytochrome P450
TR18659_c0_g3	0	0.264	5.168	5.727	2.431e-06	0.000171162	Downregulated	HSP7C_DROME	Full=Heat shock 70 kDa protein cognate 3	GO:0005811,GO:0005783,GO:0005788,GO:0005524,GO:0005875,GO:0012505,GO:0016246,GO:0005615,GO:0051298,GO:0030431	Solyc03g082920.2.1	Heat shock protein IPR013126 Heat shock protein 70
TR49951_c0_g1	0	0.258	26.211	21.418	5.90555e-09	1.72941e-06	Downregulated	0	0	0	0	0
TR39987_c0_g1	0	0.258	12.009	13.161	5.20092e-07	5.03506e-05	Downregulated	0	0	0	0	0
TR24518_c0_g1	0	0.258	6.027	9.604	0.00018211	0.00457494	Downregulated	RL15_DROME	Full=60S ribosomal protein L15	GO:0003735,GO:0005840,GO:0006412	Solyc06g064630.2.1	Ribosomal protein L15 IPR000439 Ribosomal protein L15e
TR67996_c0_g1	0	0.258	6.273	4.497	0.000394669	0.00822726	Downregulated	0	0	0	Solyc05g009120.2.1	Os03g0731050 protein (Fragment) IPR004949 Protein of unknown function DUF266, plant
TR28826_c0_g1	0	0.251	13.742	16.71	1.30128e-09	5.43697e-07	Downregulated	YSL11_ORYSJ	Full=Probable metal-nicotianamine transporter YSL11	GO:0055085,GO:0016021	Solyc03g031920.2.1	Yellow stripe-like protein 2.1 (Fragment) IPR004813 Oligopeptide transporter OPT superfamily
TR36397_c0_g1	0	0.251	11.664	17.368	1.68797e-06	0.000127618	Downregulated	OYE3_ASPFU	Full=Chanoclavine-I aldehyde reductase	GO:0035837,GO:0010181,GO:0016646	Solyc11g032130.1.1	NADPH dehydrogenase 3 IPR001155 NADH:flavin oxidoreductase_NADH oxidase, N-terminal
TR63491_c0_g1	0	0.251	10.513	12.707	7.89621e-06	0.000424257	Downregulated	1A13_SOLLC	Full=1-aminocyclopropane-1-carboxylate synthase 3	GO:0009693,GO:0009835,GO:0016847,GO:0030170	Solyc02g091990.2.1	1-aminocyclopropane-1-carboxylate synthase IPR004839 Aminotransferase, class I and II IPR004838 Aminotransferases, class-I, pyridoxal-phosphate-binding site
TR25772_c0_g1	0	0.251	9.049	9.612	4.58684e-07	4.603e-05	Downregulated	GUX3_AGABI	Full=Exoglucanase 3	GO:0030248,GO:0005576,GO:0016162,GO:0030245	0	0
TR66885_c0_g1	2.97	0.237	12.208	14.759	0.000112484	0.00311949	Downregulated	YM67_CAEEL	Full=Putative serine protease K12H4.7	GO:0045087,GO:0008236	Solyc09g010220.2.1	Lysosomal Pro-X carboxypeptidase IPR008758 Peptidase S28
TR67665_c0_g1	0	0.237	8.681	11.532	1.51523e-06	0.000117067	Downregulated	0	0	0	0	0
TR7160_c0_g1	0	0.237	8.435	8.743	1.83064e-05	0.000794128	Downregulated	0	0	0	0	0
TR60948_c0_g1	0	0.237	6.234	4.175	0.000336065	0.00722505	Downregulated	0	0	0	0	0
TR56551_c0_g2	0	0.231	8.175	12.456	1.75623e-05	0.000771331	Downregulated	0	0	0	0	0
TR60309_c0_g1	0	0.231	8.32	7.505	9.24284e-07	7.83317e-05	Downregulated	0	0	0	0	0
TR27866_c0_g1	0	0.231	4.294	6.071	5.30065e-05	0.00179251	Downregulated	MVPA_DICDI	Full=Major vault protein alpha	GO:0005634,GO:0045335,GO:0030529,GO:0009617	0	0
TR18754_c0_g1	0	0.231	3.221	3.752	9.51034e-05	0.00274538	Downregulated	RNHX1_ARATH	Full=Putative ribonuclease H protein At1g65750	GO:0003676,GO:0046872,GO:0004523	Solyc00g230060.1.1	RNase H family protein IPR012337 Polynucleotidyl transferase, ribonuclease H fold
TR17360_c0_g2	0	0.231	2.73	3.275	0.000307669	0.00675172	Downregulated	GCN1L_HUMAN	Full=Translational activator GCN1	GO:0005737,GO:0006412,GO:0005840,GO:0016020,GO:0008135,GO:0006417,GO:0044822	Solyc04g050520.2.1	Translational activator gcn1 IPR011989 Armadillo-like helical
TR66188_c0_g1	0	0.224	12.883	21.442	4.02215e-07	4.16024e-05	Downregulated	0	0	0	0	0
TR64852_c0_g1	0	0.224	10.015	12.284	4.11336e-06	0.000256109	Downregulated	0	0	0	0	0
TR56595_c0_g1	0	0.224	4.831	4.935	1.16482e-05	0.000569921	Downregulated	0	0	0	Solyc10g074350.1.1	Unknown Protein
TR62096_c0_g1	0	0.217	24.439	26.957	6.5406e-11	7.41751e-08	Downregulated	YIZG_SCHPO	Full=Uncharacterized transporter C1002.16c	GO:0051286,GO:0016021,GO:0035353,GO:0015663,GO:0005794,GO:0015890,GO:0005887,GO:0032153,GO:1903222	Solyc00g034000.1.1	Permease of the major facilitator superfamily IPR016196 Major facilitator superfamily, general substrate transporter
TR70661_c0_g1	0	0.217	8.635	9.51	0.000436691	0.00883229	Downregulated	0	0	0	0	0
TR42018_c0_g2	0	0.217	6.48	3.784	3.5658e-05	0.00133371	Downregulated	POLG_PVCV1	Full=Aspartic protease	GO:0003677,GO:0003964,GO:0008270,GO:0004190,GO:0004519,GO:0046740	Solyc06g018070.1.1	Polyprotein
TR31212_c0_g1	0	0.21	33.173	23.455	5.44395e-09	1.63082e-06	Downregulated	0	0	0	0	0
TR4625_c0_g1	0	0.21	24.477	31.297	8.89175e-07	7.61047e-05	Downregulated	0	0	0	0	0
TR14366_c0_g1	0	0.21	16.939	17.572	7.0392e-06	0.000393594	Downregulated	YHDC_SCHPO	Full=Uncharacterized transporter C1683.12	GO:0035353,GO:1903222,GO:0016021,GO:0005783,GO:0015890,GO:0005887,GO:0015663	Solyc00g034000.1.1	Permease of the major facilitator superfamily IPR016196 Major facilitator superfamily, general substrate transporter
TR68967_c0_g1	0	0.21	10.383	10.247	0.000109332	0.00305611	Downregulated	HSP82_ORYSJ	Full=Heat shock protein 81-2	GO:0006950,GO:0006457,GO:0005737,GO:0005524	Solyc03g007890.2.1	Heat shock protein 90 (Fragment) IPR003594 ATP-binding region, ATPase-like IPR001404 Heat shock protein Hsp90
TR1065_c0_g1	0	0.21	8.834	10.168	0.000245146	0.00565723	Downregulated	ATPB_DROVI	Full=ATP synthase subunit beta, mitochondrial	GO:0005743,GO:0045261,GO:0005524,GO:0006754,GO:0015992,GO:0016787	Solyc05g008460.2.1	ATP synthase subunit beta IPR005722 ATPase, F1 complex, beta subunit
TR7133_c0_g1	0	0.21	3.359	3.055	0.000189988	0.00467495	Downregulated	EF1A_CRYPV	Full=Elongation factor 1-alpha	GO:0003924,GO:0003746,GO:0005525,GO:0005737	Solyc06g009970.2.1	Elongation factor 1-alpha IPR004539 Translation elongation factor EF1A, eukaryotic and archaeal IPR000795 Protein synthesis factor, GTP-binding
TR29405_c0_g1	0	0.203	13.711	21.293	2.07004e-09	7.91951e-07	Downregulated	GABAT_EMENI	Full=4-aminobutyrate aminotransferase	GO:0043605,GO:0030170,GO:0009450,GO:0006536,GO:0003867,GO:0005829	Solyc04g054310.2.1	Alanine-glyoxylate aminotransferase IPR005814 Aminotransferase class-III
TR45725_c0_g1	0	0.203	8.42	10.748	0.000203325	0.0049323	Downregulated	MLP2_DROME	Full=Muscle LIM protein Mlp84B	GO:0060537,GO:0008307,GO:0008270,GO:0007517,GO:0030018,GO:0005634,GO:0090175,GO:0045214	Solyc08g007940.2.1	LIM domain protein 2b IPR001781 Zinc finger, LIM-type
TR13996_c0_g1	0	0.203	7.975	9.542	0.000249685	0.00573698	Downregulated	HSP80_SOLLC	Full=Heat shock cognate protein 80	GO:0006457,GO:0005737,GO:0005524,GO:0006950	Solyc07g065840.2.1	Heat shock protein 90 IPR003594 ATP-binding region, ATPase-like IPR001404 Heat shock protein Hsp90
TR29349_c0_g1	0	0.203	7.185	6.314	4.28033e-05	0.00152148	Downregulated	Y024_BORBU	Full=Uncharacterized protein BB_0024	GO:0048038,GO:0016901,GO:0005975,GO:0016021	0	0
TR40086_c0_g1	0	0.203	6.687	6.635	4.14901e-05	0.00148532	Downregulated	GBLP_DROME	Full=Guanine nucleotide-binding protein subunit beta-like protein	GO:0005875,GO:0071011,GO:0075522,GO:0048477,GO:0007626,GO:0071013,GO:0016243,GO:0044829,GO:0005829,GO:0009267,GO:0000398,GO:0005737,GO:0035220,GO:0042335,GO:0018991,GO:0046716,GO:0045725,GO:0005776	Solyc06g069010.2.1	Guanine nucleotide-binding protein beta subunit-like protein IPR020472 G-protein beta WD-40 repeat, region
TR19735_c0_g1	0	0.203	6.112	6.776	7.67208e-05	0.00238608	Downregulated	0	0	0	0	0
TR14725_c0_g1	0	0.203	6.035	5.797	0.000115468	0.00318555	Downregulated	0	0	0	0	0
TR62771_c0_g1	0	0.203	4.923	5.335	8.73164e-06	0.000455278	Downregulated	0	0	0	0	0
TR15165_c0_g1	0	0.197	26.778	28.602	3.61795e-07	3.89439e-05	Downregulated	0	0	0	0	0
TR19552_c0_g1	0	0.197	8.903	9.142	1.45673e-07	1.88036e-05	Downregulated	HGD_EMENI	Full=Homogentisate 1,2-dioxygenase	GO:0006572,GO:0006559,GO:0004411,GO:0046872	Solyc12g014100.1.1	Homogentisate 1 2-dioxygenase IPR005708 Homogentisate 1,2-dioxygenase
TR15282_c0_g1	0	0.197	7.983	6.8	1.33089e-05	0.000628885	Downregulated	DCE_PETHY	Full=Glutamate decarboxylase	GO:0006536,GO:0004351,GO:0030170	Solyc11g011920.1.1	Glutamate decarboxylase IPR010107 Glutamate decarboxylase
TR37863_c0_g1	0	0.197	5.836	8.727	0.000331771	0.00715211	Downregulated	0	0	0	0	0
TR64928_c0_g1	0	0.197	5.222	5.46	2.11776e-05	0.000888339	Downregulated	ADT_DROME	Full=ADP,ATP carrier protein	GO:0005811,GO:0070050,GO:0005743,GO:0005739,GO:0005471,GO:0001508,GO:0010507,GO:0007268,GO:0006839,GO:0005829,GO:0007629,GO:0051560,GO:0008340,GO:0009612,GO:0015866,GO:0051480,GO:0034599,GO:0016021,GO:0015867,GO:0040011,GO:0051124,GO:0048489,GO:0046716,GO:0048477,GO:2001171	Solyc11g062190.1.1	Mitochondrial ADP_ATP carrier proteins IPR002113 Adenine nucleotide translocator 1
TR22875_c0_g1	0	0.197	5.391	3.909	0.000182808	0.00458518	Downregulated	TBA1_ANEPH	Full=Tubulin alpha-1 chain	GO:0051258,GO:0007017,GO:0005874,GO:0005737,GO:0005525,GO:0003924,GO:0005200	Solyc02g087880.2.1	Tubulin alpha-7 chain IPR002452 Alpha tubulin
TR64937_c0_g1	0	0.19	29.117	44.019	9.61826e-08	1.3279e-05	Downregulated	0	0	0	0	0
TR3398_c0_g2	0	0.19	10.03	6.831	0.000264773	0.00599687	Downregulated	TPS3_SOLLC	Full=(-)-camphene/tricyclene synthase, chloroplastic	GO:0050551,GO:0050552,GO:0016114,GO:0009507,GO:0000287	Solyc01g105920.2.1	(E)-beta-ocimene synthase IPR005630 Terpene synthase, metal-binding domain
TR46666_c0_g1	0	0.19	5.56	6.643	0.000493664	0.00963694	Downregulated	LACP_KLULA	Full=Lactose permease	GO:0016021,GO:0008643,GO:0015293,GO:0022891	Solyc11g012450.1.1	Predicted transporter IPR003663 Sugar_inositol transporter
TR48729_c0_g1	0	0.183	18.435	15.065	7.15918e-06	0.00039953	Downregulated	0	0	0	0	0
TR62663_c0_g1	0	0.183	10.659	11.626	1.10231e-08	2.57373e-06	Downregulated	HDNO_ARTOX	Full=6-hydroxy-D-nicotine oxidase	GO:0008762,GO:0050660,GO:0019608,GO:0018530	Solyc02g070070.1.1	FAD-binding domain-containing protein IPR006094 FAD linked oxidase, N-terminal
TR24547_c0_g1	0	0.183	7.415	7.622	6.77671e-06	0.000386333	Downregulated	0	0	0	0	0
TR1590_c0_g1	0	0.183	7.569	6.338	2.63124e-06	0.000181636	Downregulated	BGH3_RABIT	Full=Transforming growth factor-beta-induced protein ig-h3	GO:0007155,GO:0005578	0	0
TR69073_c0_g1	0	0.183	6.027	7.513	4.83176e-06	0.000291687	Downregulated	HMP_BORPE	Full=Flavohemoprotein {ECO:0000255|HAMAP-Rule:MF_01252}	GO:0009636,GO:0071949,GO:0008941,GO:0051409,GO:0020037,GO:0005506,GO:0019825,GO:0005344	0	0
TR45437_c0_g1	0	0.183	6.679	5.539	0.000387445	0.00812114	Downregulated	URHG2_BACSU	Full=Unsaturated rhamnogalacturonyl hydrolase YteR	GO:0016798,GO:0005737	0	0
TR28685_c0_g1	0	0.183	5.468	7.356	0.000384998	0.0080896	Downregulated	0	0	0	0	0
TR56370_c0_g1	0	0.183	5.284	4.348	5.66905e-05	0.00188898	Downregulated	0	0	0	0	0
TR30976_c0_g2	0	0.183	4.21	4.74	0.000109118	0.0030542	Downregulated	0	0	0	0	0
TR42421_c0_g1	0	0.183	4.616	3.972	0.000150464	0.00392592	Downregulated	COX1_PHYME	Full=Cytochrome c oxidase subunit 1	GO:0070469,GO:0020037,GO:0005743,GO:0016021,GO:0009060,GO:0005506,GO:0004129,GO:0006119	Solyc11g063610.1.1	Cytochrome c oxidase subunit 1 IPR000883 Cytochrome c oxidase, subunit I
TR15197_c0_g1	0	0.176	12.545	15.331	1.53659e-09	6.18999e-07	Downregulated	PERO_DROME	Full=Peroxidase	GO:0022008,GO:0005576,GO:0042600,GO:0004601,GO:0042744,GO:0046872,GO:0045471,GO:0006979,GO:0020037,GO:0006909,GO:0007306	Solyc02g087090.2.1	Prostaglandin G_H synthase 2 IPR002007 Haem peroxidase, animal
TR71395_c0_g1	0	0.176	11.426	15.19	5.15344e-07	5.01669e-05	Downregulated	UAPA_EMENI	Full=Uric acid-xanthine permease	GO:0042907,GO:0042906,GO:0034423,GO:0015143,GO:0000324,GO:0016021,GO:0015747,GO:0010008,GO:1903825,GO:0005886,GO:0002060	Solyc01g106920.2.1	Nucleobase ascorbate transporter IPR006043 Xanthine_uracil_vitamin C permease
TR70894_c0_g1	0	0.176	10	13.263	1.03896e-06	8.52481e-05	Downregulated	0	0	0	0	0
TR7304_c0_g3	0	0.176	5.107	7.818	0.00046195	0.00922563	Downregulated	0	0	0	Solyc04g074490.2.1	Bifunctional arginine demethylase and lysyl-hydroxylase JMJD6 IPR013129 Transcription factor jumonji
TR26202_c0_g1	0	0.176	4.164	5.468	7.74031e-05	0.00239409	Downregulated	TBP_EMENI	Full=TATA-box-binding protein	GO:0070893,GO:0005668,GO:0008301,GO:0042790,GO:0070898,GO:0003682,GO:1903357,GO:0001075,GO:0005669,GO:0001186,GO:0001026,GO:0001016,GO:0000979,GO:0000126	Solyc01g028930.2.1	TATA-box binding protein IPR000814 TATA-box binding
TR36162_c0_g1	0	0.176	4.133	4.199	0.000141408	0.00374188	Downregulated	RL5_DROME	Full=60S ribosomal protein L5	GO:0000027,GO:0003735,GO:0003723,GO:0005840,GO:0008097,GO:0006412,GO:0022625	Solyc06g082870.2.1	60S ribosomal protein L5-1 IPR005485 Ribosomal protein L5, eukaryotic
TR47959_c0_g1	0	0.176	4.509	3.141	0.000307929	0.00675276	Downregulated	0	0	0	0	0
TR29208_c0_g2	0	0.17	30.789	38.144	3.20229e-11	4.62206e-08	Downregulated	EGLD_ASPOR	Full=Probable endo-beta-1,4-glucanase D	GO:0030248,GO:0030245,GO:0008810,GO:0005576	0	0
TR15347_c0_g1	0	0.17	17.852	21.183	8.31966e-09	2.16543e-06	Downregulated	URIC_EMENI	Full=Uricase	GO:0019628,GO:0005829,GO:0005777,GO:0005634,GO:0006145,GO:0019627,GO:0005576,GO:0004846	Solyc11g006550.1.1	Uricase IPR002042 Uricase
TR54760_c0_g1	0	0.17	15.935	18.566	2.25133e-09	8.2171e-07	Downregulated	ECM33_ASPFU	Full=Protein ecm33	GO:0035690,GO:0031225,GO:0030476,GO:0009277,GO:0005619,GO:0005886,GO:0005783	0	0
TR46674_c0_g1	0	0.17	14.815	17.658	7.55286e-08	1.09513e-05	Downregulated	0	0	0	0	0
TR60378_c0_g1	0	0.17	18.082	13.451	8.33201e-06	0.000438764	Downregulated	0	0	0	0	0
TR71225_c0_g1	0	0.17	10.03	17.572	2.09058e-05	0.000879425	Downregulated	HSP30_NEUCR	Full=30 kDa heat shock protein	GO:0005737	0	0
TR58742_c0_g1	0	0.17	9.148	8.751	2.6028e-07	2.97299e-05	Downregulated	1A13_SOLLC	Full=1-aminocyclopropane-1-carboxylate synthase 3	GO:0009693,GO:0009835,GO:0016847,GO:0030170	Solyc03g043890.2.1	1-aminocyclopropane-1-carboxylate synthase IPR004839 Aminotransferase, class I and II IPR004838 Aminotransferases, class-I, pyridoxal-phosphate-binding site
TR36614_c0_g1	0	0.17	9.34	9.025	1.72281e-06	0.00012872	Downregulated	PR1C_TOBAC	Full=Pathogenesis-related protein 1C	GO:0009607,GO:0006952,GO:0005773,GO:0005576	Solyc07g006700.1.1	Pathogenesis-related protein PR-1 IPR002413 Ves allergen
TR22330_c0_g1	0	0.17	9.056	7.489	0.00012317	0.00336297	Downregulated	0	0	0	0	0
TR21478_c0_g1	0	0.17	6.817	7.317	1.8145e-05	0.000790364	Downregulated	HS90A_RABIT	Full=Heat shock protein HSP 90-alpha	GO:0005737,GO:0046677,GO:0005634,GO:0005524,GO:0042470,GO:0006457,GO:0005886,GO:0009409,GO:0009408	Solyc07g065840.2.1	Heat shock protein 90 IPR003594 ATP-binding region, ATPase-like IPR001404 Heat shock protein Hsp90
TR65836_c1_g1	0	0.17	5.552	10.38	0.000497729	0.0097022	Downregulated	0	0	0	0	0
TR31743_c0_g2	0	0.17	5.989	5.351	1.41523e-06	0.000110961	Downregulated	0	0	0	0	0
TR24533_c0_g1	0	0.17	4.846	5.131	9.19384e-05	0.00269318	Downregulated	CARP_ASPFU	Full=Vacuolar protease A	GO:0004190,GO:0005576,GO:0000324,GO:0051603,GO:0005622,GO:0016237,GO:0005775,GO:0009405,GO:0009267	Solyc07g051850.2.1	Aspartic proteinase IPR001461 Peptidase A1
TR50135_c0_g1	0	0.17	4.187	5.257	5.66921e-05	0.00188898	Downregulated	0	0	0	0	0
TR45486_c0_g1	0	0.17	3.642	4.058	0.000183562	0.00459324	Downregulated	TRF6B_XENLA	Full=TNF receptor-associated factor 6-B	GO:0042981,GO:0070534,GO:0008270,GO:0007250,GO:0016874,GO:0004842,GO:0006955,GO:0005737	Solyc09g031650.2.1	Zinc finger protein IPR001841 Zinc finger, RING-type
TR49869_c0_g1	0	0.163	17.768	34.61	5.16614e-07	5.01669e-05	Downregulated	YIZG_SCHPO	Full=Uncharacterized transporter C1002.16c	GO:0051286,GO:0016021,GO:0035353,GO:0015663,GO:0005794,GO:0015890,GO:0005887,GO:0032153,GO:1903222	Solyc00g034000.1.1	Permease of the major facilitator superfamily IPR016196 Major facilitator superfamily, general substrate transporter
TR11029_c0_g1	0	0.163	12.492	15.104	1.59399e-07	2.02537e-05	Downregulated	0	0	0	0	0
TR40227_c0_g1	0	0.163	8.612	13.349	6.49721e-05	0.00208818	Downregulated	0	0	0	0	0
TR53669_c0_g1	0	0.163	7.262	7.184	1.00422e-05	0.000512669	Downregulated	CPC1_NEUCR	Full=Cross-pathway control protein 1	GO:0043565,GO:0008652,GO:0003700,GO:0006351,GO:0005634	0	0
TR24550_c0_g1	0	0.163	6.756	7.912	0.000246679	0.00568849	Downregulated	0	0	0	0	0
TR62901_c0_g1	0	0.163	6.487	4.92	0.000303823	0.0066858	Downregulated	RL19B_SCHPO	Full=60S ribosomal protein L19-B	GO:0006412,GO:0044822,GO:0005829,GO:0003735,GO:0002181,GO:0022625	Solyc09g075430.2.1	Ribosomal protein L19 IPR000196 Ribosomal protein L19_L19e
TR10650_c0_g1	0	0.163	5.767	4.967	0.000376757	0.00794392	Downregulated	0	0	0	0	0
TR52096_c0_g1	0	0.156	20.789	22.554	4.23044e-07	4.3194e-05	Downregulated	0	0	0	0	0
TR32905_c0_g1	0	0.156	13.243	10.733	1.20322e-05	0.000584203	Downregulated	TNNC3_DROME	Full=Troponin C, isoform 3	GO:0005509	Solyc06g053930.2.1	Calmodulin IPR011992 EF-Hand type
TR19517_c0_g1	0	0.156	9.678	10.02	7.85548e-08	1.12891e-05	Downregulated	SR4_PHYPO	Full=Spherulin-4	0	0	0
TR6444_c0_g2	0	0.156	7.032	7.944	1.27855e-05	0.000608684	Downregulated	Y5838_ARATH	Full=Probably inactive leucine-rich repeat receptor-like protein kinase At5g48380	GO:0031625,GO:0031348,GO:0005524,GO:0046777,GO:0016301,GO:0007178,GO:0009506,GO:0009755,GO:0016021,GO:0004672,GO:0005886,GO:0042742,GO:0060548,GO:0033612,GO:0004675,GO:0001653	Solyc06g082920.2.1	Receptor like kinase, RLK
TR52719_c0_g1	0	0.156	5.636	4.465	5.88188e-05	0.00194556	Downregulated	ERAP1_HUMAN	Full=Endoplasmic reticulum aminopeptidase 1	GO:0005576,GO:0005138,GO:0042277,GO:0005151,GO:0004177,GO:0045444,GO:0008235,GO:0019885,GO:0008217,GO:0005829,GO:0070062,GO:0005615,GO:0002474,GO:0005789,GO:0016021,GO:0005788,GO:0045766,GO:0005783,GO:0001525,GO:0016020,GO:0008270,GO:0006509,GO:0070006,GO:0045088,GO:0043171,GO:0009617	Solyc08g062630.2.1	Aminopeptidase-like protein IPR015568 Peptidase M1, puromycin-sensitive aminopeptidase
TR6080_c0_g1	0	0.156	4.195	6.925	0.000499922	0.00972703	Downregulated	0	0	0	0	0
TR35640_c1_g2	0	0.156	4.8	4.066	0.000126271	0.00340952	Downregulated	0	0	0	0	0
TR9976_c0_g1	0	0.149	8.934	11.743	4.10357e-05	0.00147906	Downregulated	0	0	0	0	0
TR30970_c0_g1	0	0.149	6.579	10.756	2.37662e-07	2.7681e-05	Downregulated	ACON_ASPFU	Full=Aconitate hydratase, mitochondrial	GO:0003690,GO:0000002,GO:0051539,GO:0046872,GO:0019878,GO:0042645,GO:0006099,GO:0003994,GO:0003697,GO:0005829,GO:0005622	Solyc07g052350.2.1	3-isopropylmalate dehydratase large subunit IPR006249 Aconitase_iron regulatory protein 2
TR41269_c0_g1	0	0.149	6.48	5.17	0.000474211	0.00941131	Downregulated	0	0	0	0	0
TR29748_c0_g1	0	0.149	4.532	6.471	0.000314748	0.00688326	Downregulated	CISY1_AEDAE	Full=Probable citrate synthase 1, mitochondrial	GO:0006099,GO:0005759,GO:0005975,GO:0004108,GO:0044262	Solyc01g073740.2.1	Citrate synthase IPR010109 Citrate synthase, eukaryotic
TR45749_c0_g1	0	0.149	4.003	7.286	0.000437448	0.00883633	Downregulated	0	0	0	0	0
TR33528_c0_g1	0	0.149	4.954	4.536	0.0005149	0.00995746	Downregulated	0	0	0	0	0
TR714_c0_g1	0	0.149	4.547	5.194	0.000490927	0.0096262	Downregulated	MGST3_HUMAN	Full=Microsomal glutathione S-transferase 3	GO:0006629,GO:0005789,GO:0010243,GO:0043231,GO:0007165,GO:0005635,GO:0004602,GO:0006805,GO:0004601,GO:0004364,GO:0016021,GO:0016020,GO:0070062,GO:0044281,GO:1901687	Solyc02g081430.2.1	Microsomal glutathione S-transferase 3
TR22806_c0_g1	0	0.149	2.807	3.525	0.000342121	0.00734034	Downregulated	0	0	0	0	0
TR19400_c1_g1	0	0.142	13.435	18.543	1.45428e-07	1.88036e-05	Downregulated	0	0	0	0	0
TR19794_c0_g1	0	0.142	14.056	16.584	8.95565e-10	4.36698e-07	Downregulated	DIP5_YEAST	Full=Dicarboxylic amino acid permease	GO:0016021,GO:0005886,GO:0015171,GO:0006865	Solyc10g081460.1.1	Amino acid transporter IPR015606 Cationic amino acid transporter
TR55019_c0_g1	0	0.142	7.04	13.514	7.68282e-05	0.00238709	Downregulated	0	0	0	Solyc02g038770.1.1	RING finger protein 44 IPR018957 Zinc finger, C3HC4 RING-type
TR42184_c0_g1	0	0.142	6.771	9.855	4.40436e-05	0.00155568	Downregulated	HS901_ARATH	Full=Heat shock protein 90-1	GO:0005524,GO:0009816,GO:0005737,GO:0006457	Solyc07g065840.2.1	Heat shock protein 90 IPR003594 ATP-binding region, ATPase-like IPR001404 Heat shock protein Hsp90
TR52757_c0_g1	0	0.142	7.308	6.33	5.47754e-06	0.00032511	Downregulated	CBPB_ASTAS	Full=Carboxypeptidase B	GO:0008270,GO:0004181,GO:0005576	Solyc04g082340.2.1	Carboxypeptidase B IPR000834 Peptidase M14, carboxypeptidase A
TR24179_c0_g1	0	0.142	6.265	8.751	0.000106853	0.00300798	Downregulated	DHE4_GIBFU	Full=NADP-specific glutamate dehydrogenase	GO:0006520,GO:0004354	Solyc01g068210.2.1	Glutamate dehydrogenase IPR006095 Glutamate_phenylalanine_leucine_valine dehydrogenase
TR59040_c0_g1	0	0.142	4.118	6.165	0.00033159	0.00715211	Downregulated	0	0	0	0	0
TR40532_c0_g1	0	0.142	5.391	3.69	0.000451338	0.00906502	Downregulated	0	0	0	0	0
TR69040_c0_g1	0	0.142	3.29	3.729	0.000435911	0.00882212	Downregulated	GUX1_HUMGT	Full=Exoglucanase 1	GO:0030248,GO:0005576,GO:0030245,GO:0016162	0	0
TR32897_c0_g1	2.185	0.136	10.989	12.378	3.26394e-05	0.00124422	Downregulated	GEL4_ASPFU	Full=1,3-beta-glucanosyltransferase gel4	GO:0016740,GO:0031225,GO:0005975,GO:0005886	0	0
TR40298_c0_g1	0	0.136	5.69	12.119	7.58711e-05	0.00236429	Downregulated	PLYH_EMENI	Full=Pectate lyase H	GO:0045490,GO:0030570,GO:0005576,GO:0071555	0	0
TR35964_c0_g1	0	0.136	7.538	7.693	3.99906e-05	0.00144962	Downregulated	0	0	0	0	0
TR64605_c0_g1	0	0.136	7.293	5.797	9.9435e-05	0.002842	Downregulated	DCE5_ARATH	Full=Glutamate decarboxylase 5	GO:0009506,GO:0030170,GO:0006536,GO:0004351	Solyc05g054050.2.1	Glutamate decarboxylase IPR010107 Glutamate decarboxylase
TR39290_c0_g1	0	0.136	6.756	3.126	4.19845e-05	0.00149627	Downregulated	CDH_PHACH	Full=Cellobiose dehydrogenase	GO:0047735,GO:0050660,GO:0046872,GO:0030245,GO:0005576	0	0
TR68764_c0_g1	0	0.136	4.67	5.39	0.00026447	0.00599429	Downregulated	0	0	0	0	0
TR36519_c0_g1	0	0.136	3.006	4.066	7.86819e-05	0.00241162	Downregulated	0	0	0	0	0
TR66270_c0_g1	0	0.129	8.412	12.127	5.70112e-07	5.39373e-05	Downregulated	0	0	0	0	0
TR35750_c0_g2	0	0.129	8.366	10.505	2.85967e-07	3.21075e-05	Downregulated	YEME_SCHPO	Full=Uncharacterized permease C29B12.14c	GO:0005829,GO:0005886,GO:0015851,GO:0015505,GO:0005634,GO:0015205,GO:0016021,GO:1903791	Solyc09g008550.2.1	NCS1 family transporter cytosine_purines_uracil_thiamine_allantoin IPR001248 Permease, cytosine_purines, uracil, thiamine, allantoin
TR43527_c0_g1	0	0.129	8.267	8.837	3.44485e-05	0.0012964	Downregulated	GLNA_FUSSH	Full=Glutamine synthetase	GO:0005524,GO:0005737,GO:0004356,GO:0006542	Solyc04g014510.2.1	Glutamine synthetase IPR008146 Glutamine synthetase, catalytic region
TR44511_c0_g1	0	0.129	6.756	5.656	0.00012053	0.00330509	Downregulated	0	0	0	0	0
TR36770_c0_g5	0	0.129	4.494	4.975	0.00018858	0.00465643	Downregulated	0	0	0	0	0
TR5697_c0_g1	0	0.129	3.926	5.734	0.00032646	0.00706675	Downregulated	BZPL_DICDI	Full=Probable basic-leucine zipper transcription factor L	GO:0005634,GO:0003700,GO:0043565,GO:0006351	0	0
TR66864_c0_g1	3.019	0.122	12.492	15.856	7.54662e-05	0.00235398	Downregulated	YM67_CAEEL	Full=Putative serine protease K12H4.7	GO:0045087,GO:0008236	Solyc03g033620.2.1	Serine carboxypeptidase S28 family protein IPR008758 Peptidase S28
TR11125_c0_g2	0	0.122	10.069	13.514	8.12293e-06	0.000432053	Downregulated	EF1A2_CANAL	Full=Elongation factor 1-alpha 2	GO:0003924,GO:0003746,GO:0005737,GO:0005525	Solyc11g069700.1.1	Elongation factor 1-alpha IPR004539 Translation elongation factor EF1A, eukaryotic and archaeal
TR54638_c0_g1	0	0.122	10.092	13.662	8.17102e-06	0.00043316	Downregulated	PR04_SOLLC	Full=Pathogenesis-related leaf protein 4	GO:0009607,GO:0006952,GO:0005576	Solyc09g007010.1.1	Pathogenesis related protein PR-1 IPR002413 Ves allergen
TR4225_c0_g1	0	0.122	9.156	11.132	1.59458e-07	2.02537e-05	Downregulated	AM4N_DROAN	Full=Alpha-amylase 4N	GO:0046872,GO:0005975,GO:0004556	0	0
TR58425_c0_g2	0	0.122	9.194	11.657	5.63704e-06	0.000332711	Downregulated	EF1A_ONCVO	Full=Elongation factor 1-alpha	GO:0003746,GO:0003924,GO:0005737,GO:0005525	Solyc11g069700.1.1	Elongation factor 1-alpha IPR004539 Translation elongation factor EF1A, eukaryotic and archaeal
TR17893_c0_g1	0	0.122	6.932	7.528	3.26021e-05	0.00124422	Downregulated	CUDP_METAN	Full=Cuticle-degrading protease	GO:0005576,GO:0004252	0	0
TR24417_c2_g1	0	0.122	7.837	5.507	6.095e-05	0.00200353	Downregulated	CEP2_ARATH	Full=KDEL-tailed cysteine endopeptidase CEP2	GO:0005783,GO:0008234	Solyc01g107760.2.1	Cathepsin B-like cysteine proteinase IPR013128 Peptidase C1A, papain
TR17909_c1_g1	0	0.122	6.794	7.019	4.07176e-05	0.00147093	Downregulated	YOOH_SCHPO	Full=Putative xanthine/uracil permease C887.17	GO:0016021,GO:0005794,GO:0005345,GO:0000139	Solyc06g050250.1.1	Xanthine_uracil permease family protein IPR006043 Xanthine_uracil_vitamin C permease
TR27138_c0_g2	0	0.122	5.958	5.962	0.000144151	0.00379864	Downregulated	GSP1_CANAW	Full=GTP-binding nuclear protein GSP1/Ran	GO:0005525,GO:0007264,GO:0006913,GO:0005634,GO:0003924,GO:0006886	Solyc01g104700.2.1	GTP-binding nuclear protein Ran-A1 IPR018210 GTP-binding nuclear protein, Ran, conserved site IPR002041 Ran GTPase
TR12239_c0_g1	0	0.122	3.888	5.711	2.26317e-05	0.000928485	Downregulated	0	0	0	0	0
TR33703_c0_g1	0	0.122	3.336	6.44	0.000388975	0.00813712	Downregulated	EF2_BOMMO	Full=Translation elongation factor 2	GO:0005737,GO:0003924,GO:0003746,GO:0005525	Solyc08g062910.2.1	Elongation factor EF-2 IPR000795 Protein synthesis factor, GTP-binding
TR50389_c0_g1	0	0.122	4.064	4.888	0.000269964	0.00608405	Downregulated	0	0	0	0	0
TR53687_c0_g1	0	0.122	3.842	3.666	0.000483023	0.00954444	Downregulated	0	0	0	0	0
TR1046_c0_g1	0	0.115	8.681	8.829	1.92595e-07	2.34316e-05	Downregulated	EGLC_ASPNC	Full=Probable glucan endo-1,3-beta-glucosidase eglC	GO:0005618,GO:0005576,GO:0000272,GO:0005886,GO:0031225,GO:0042973,GO:0071555	0	0
TR66242_c0_g1	0	0.115	5.629	5.915	1.69923e-05	0.000756767	Downregulated	0	0	0	0	0
TR63447_c0_g2	0	0.115	5.813	8.382	2.84242e-05	0.00111293	Downregulated	GUN4_THEFU	Full=Endoglucanase E-4	GO:0030245,GO:0008810,GO:0030248	Solyc02g014220.2.1	Endoglucanase 1 IPR001701 Glycoside hydrolase, family 9
TR24417_c2_g3	0	0.115	5.368	8.343	5.32568e-05	0.00179906	Downregulated	XCP1_ARATH	Full=Xylem cysteine proteinase 1	GO:0005634,GO:0000325,GO:0005615,GO:0004197,GO:0005886,GO:0005764,GO:0010623,GO:0051603	Solyc01g107760.2.1	Cathepsin B-like cysteine proteinase IPR013128 Peptidase C1A, papain
TR67407_c0_g1	0	0.115	5.23	6.675	0.000123382	0.00336297	Downregulated	RL6_PIG	Full=60S ribosomal protein L6	GO:0016020,GO:0022625,GO:0000027,GO:0003735,GO:0005925,GO:0002181,GO:0044822,GO:0005634,GO:0036464	Solyc05g054070.2.1	60S ribosomal protein L6 IPR000915 Ribosomal protein L6E
TR28691_c0_g1	0	0.115	4.946	4.661	0.000433549	0.0088037	Downregulated	0	0	0	0	0
TR48750_c0_g1	0	0.115	3.382	4.935	0.000326698	0.00706675	Downregulated	0	0	0	0	0
TR33028_c0_g1	0	0.115	3.175	2.554	0.000125154	0.00339381	Downregulated	POLX_TOBAC	Full=Endonuclease	GO:0003676,GO:0008270,GO:0004519,GO:0004190,GO:0003964,GO:0015074	Solyc00g075040.1.1	Transposon Ty1-A Gag-Pol polyprotein IPR013103 Reverse transcriptase, RNA-dependent DNA polymerase
TR15773_c0_g1	0	0.109	8.29	10.881	9.07712e-08	1.27538e-05	Downregulated	LACP_KLULA	Full=Lactose permease	GO:0016021,GO:0008643,GO:0015293,GO:0022891	Solyc12g008320.1.1	Solute carrier family 2, facilitated glucose transporter member 3 IPR003663 Sugar_inositol transporter
TR39284_c0_g1	0	0.109	9.087	9.597	4.78068e-06	0.000289154	Downregulated	SUBF_BACSU	Full=Bacillopeptidase F	GO:0004252,GO:0005576	0	0
TR54531_c0_g1	0	0.109	8.389	8.625	1.01916e-05	0.0005178	Downregulated	0	0	0	0	0
TR56366_c0_g1	0	0.109	7.086	9.926	3.87631e-05	0.00141481	Downregulated	0	0	0	0	0
TR41190_c0_g1	0	0.109	4.931	8.226	5.97452e-05	0.00197004	Downregulated	CTRB1_LITVA	Full=Chymotrypsin BI	GO:0030574,GO:0005615,GO:0004252	0	0
TR63442_c0_g1	0	0.109	5.721	6.8	4.22539e-05	0.00150418	Downregulated	ALS_PAPHA	Full=Insulin-like growth factor-binding protein complex acid labile subunit	GO:0007155,GO:0005615	Solyc06g006040.1.1	Receptor like kinase, RLK
TR2619_c0_g1	0	0.109	4.294	6.04	0.000171452	0.00436744	Downregulated	CPN2_HUMAN	Full=Carboxypeptidase N subunit 2	GO:0005576,GO:0050821,GO:0070062,GO:0030234,GO:0050790,GO:0072562	Solyc10g006930.2.1	LRR receptor-like serine_threonine-protein kinase, RLP
TR23638_c0_g1	0	0.109	5.138	5.382	0.000137815	0.00365901	Downregulated	0	0	0	0	0
TR690_c0_g1	0	0.109	3.412	4.841	1.73213e-05	0.000763918	Downregulated	TPR_PORGI	Full=Thiol protease	GO:0004198,GO:0005622,GO:0009405	0	0
TR51790_c0_g1	0	0.109	2.853	4.716	0.00049978	0.00972703	Downregulated	0	0	0	0	0
TR7852_c0_g1	0	0.102	8.366	7.701	1.05165e-05	0.000528298	Downregulated	FH6_ARATH	Full=Formin-like protein 6	GO:0005730,GO:0005634,GO:0005819,GO:0016021,GO:0005737,GO:0003779,GO:0005618,GO:0009524,GO:0005886	Solyc02g092470.2.1	Formin 3 IPR015425 Actin-binding FH2
TR1839_c0_g2	0	0.102	4.609	5.053	0.000184953	0.00461351	Downregulated	0	0	0	0	0
TR61504_c0_g1	0	0.102	4.187	5.351	0.000202797	0.00492325	Downregulated	BTGE_ASPTN	Full=Probable beta-glucosidase btgE	GO:0005576,GO:0030245,GO:0009277,GO:0008422	0	0
TR22434_c0_g1	0	0.102	2.906	3.478	0.000493404	0.00963694	Downregulated	CBPA1_ANOGA	Full=Zinc carboxypeptidase A 1	GO:0006508,GO:0007586,GO:0005615,GO:0004181,GO:0008270	0	0
TR2866_c0_g1	0	0.095	13.496	13.286	2.78998e-09	9.73551e-07	Downregulated	PU91_BRACO	Full=Puff II/9-1 protein	0	0	0
TR56374_c0_g2	0	0.095	6.978	11.265	4.01743e-06	0.000253114	Downregulated	TSSP_MOUSE	Full=Thymus-specific serine protease	GO:0005768,GO:0005764,GO:0008236,GO:0016023	Solyc03g033620.2.1	Serine carboxypeptidase S28 family protein IPR008758 Peptidase S28
TR49553_c2_g1	0	0.095	9.309	6.11	1.21512e-05	0.000588042	Downregulated	ERF99_ARATH	Full=Ethylene-responsive transcription factor 13	GO:0009873,GO:0006952,GO:0010200,GO:0006351,GO:0005634,GO:0003677,GO:0003700	Solyc01g090300.2.1	Ethylene responsive transcription factor 1b IPR001471 Pathogenesis-related transcriptional factor and ERF, DNA-binding
TR22988_c0_g1	0	0.095	4.662	6.886	4.50372e-05	0.00157675	Downregulated	TBB1_CYAPA	Full=Tubulin beta-1 chain	GO:0005525,GO:0005200,GO:0003924,GO:0007017,GO:0005737,GO:0005874,GO:0051258	Solyc06g035970.2.1	Tubulin beta chain IPR002453 Beta tubulin
TR62664_c0_g1	0	0.095	5.705	4.583	5.94668e-05	0.0019629	Downregulated	CU21_LOCMI	Full=Cuticle protein 21	GO:0042302	0	0
TR40120_c1_g1	0	0.088	8.366	8.233	7.26048e-06	0.000401654	Downregulated	ALF_DROME	Full=Fructose-bisphosphate aldolase	GO:0007095,GO:0031430,GO:0006096,GO:0005829,GO:0004332,GO:0030018,GO:0007498	Solyc07g065900.2.1	Fructose-bisphosphate aldolase IPR000741 Fructose-bisphosphate aldolase, class-I
TR32671_c0_g1	0	0.088	12.845	16.663	1.65366e-07	2.06733e-05	Downregulated	UAPA_EMENI	Full=Uric acid-xanthine permease	GO:0042907,GO:0042906,GO:0034423,GO:0015143,GO:0000324,GO:0016021,GO:0015747,GO:0010008,GO:1903825,GO:0005886,GO:0002060	Solyc10g049280.1.1	Nucleobase ascorbate transporter IPR006043 Xanthine_uracil_vitamin C permease
TR51806_c0_g1	0	0.088	8.527	9.518	3.81638e-06	0.000242857	Downregulated	GLNA_COLGL	Full=Glutamine synthetase	GO:0006542,GO:0004356,GO:0005737,GO:0005524	Solyc01g080280.2.1	Glutamine synthetase IPR008146 Glutamine synthetase, catalytic region
TR20936_c0_g1	0	0.088	6.71	6.126	1.93938e-05	0.000828069	Downregulated	LIPH_HUMAN	Full=Lipase member H	GO:0004620,GO:0005615,GO:0005886,GO:0052689,GO:0016042,GO:0008201	0	0
TR51948_c0_g1	0	0.088	6.902	8.226	2.27708e-05	0.000932986	Downregulated	MEGF6_MOUSE	Full=Multiple epidermal growth factor-like domains protein 6	GO:0005509,GO:0005576	0	0
TR32791_c0_g1	0	0.088	7.638	4.677	4.28355e-05	0.00152148	Downregulated	0	0	0	0	0
TR15364_c0_g1	0	0.088	7.17	4.23	8.11588e-05	0.00245674	Downregulated	VDAC_DROME	Full=Voltage-dependent anion-selective channel	GO:0007602,GO:1903959,GO:0005875,GO:0007291,GO:0046930,GO:0030382,GO:0008308,GO:0005811,GO:0015288,GO:0005741,GO:0016006,GO:0007005,GO:0005739,GO:0006811	Solyc02g067460.2.1	Porin_voltage-dependent anion-selective channel protein IPR001925 Porin, eukaryotic type
TR68206_c0_g1	0	0.088	5.184	6.588	5.78622e-05	0.00191991	Downregulated	CALR_DROME	Full=Calreticulin	GO:0045169,GO:0042048,GO:0048854,GO:0031987,GO:0030431,GO:0007476,GO:0007417,GO:0001964,GO:0005811,GO:0030246,GO:0005788,GO:0005615,GO:0005509,GO:0022008,GO:0012505,GO:0006457,GO:0007422	Solyc01g100380.2.1	Calreticulin 2 calcium-binding protein IPR009169 Calreticulin
TR28402_c0_g1	0	0.088	5.092	4.849	2.58504e-05	0.00103263	Downregulated	NAC90_ARATH	Full=NAC domain-containing protein 90	GO:0006351,GO:0003677,GO:0005634,GO:0003700	Solyc09g010160.1.1	NAC domain protein IPR003441 protein
TR62585_c0_g1	0	0.088	3.589	6.604	0.000118833	0.00326704	Downregulated	HAC1_HYPJE	Full=Transcriptional activator hac1	GO:0043565,GO:0006986,GO:0006351,GO:0005634,GO:0003700	0	0
TR60073_c0_g1	0	0.088	5.13	3.102	0.000241754	0.00561918	Downregulated	0	0	0	0	0
TR51323_c0_g1	0	0.088	3.167	4.599	0.000412668	0.00850349	Downregulated	0	0	0	0	0
TR22445_c0_g1	0	0.088	3.566	3.799	0.000320435	0.00697403	Downregulated	0	0	0	0	0
TR17296_c0_g1	0	0.081	8.865	9.401	9.86649e-07	8.23687e-05	Downregulated	RCF2_YEAST	Full=Respiratory supercomplex factor 2, mitochondrial	GO:0097249,GO:0031305,GO:0033617	0	0
TR35793_c0_g1	0	0.081	6.158	5.241	4.37731e-07	4.4408e-05	Downregulated	MUG70_SCHPO	Full=Meiotically up-regulated gene 70 protein	GO:0016021,GO:0031965,GO:0005829,GO:0005737,GO:0051321,GO:0005634	Solyc12g032950.1.1	CBS domain-containing protein IPR000644 Cystathionine beta-synthase, core
TR17515_c0_g1	0	0.081	6.173	5.217	2.51486e-05	0.0010147	Downregulated	0	0	0	0	0
TR23707_c0_g1	0	0.081	5.46	5.484	2.81296e-05	0.00110275	Downregulated	0	0	0	0	0
TR3770_c0_g2	0	0.081	3.819	4.935	7.74306e-05	0.00239409	Downregulated	0	0	0	0	0
TR427_c0_g1	0	0.081	1.94	1.872	0.000256217	0.00585739	Downregulated	0	0	0	0	0
TR58342_c0_g1	0	0.081	2.423	3.533	0.000326342	0.00706675	Downregulated	6PGD1_YEAST	Full=6-phosphogluconate dehydrogenase, decarboxylating 1	GO:0005737,GO:0004616,GO:0050661,GO:0009051,GO:0034599,GO:0019521	Solyc12g056120.1.1	6-phosphogluconate dehydrogenase decarboxylating IPR006113 6-phosphogluconate dehydrogenase, decarboxylating
TR13575_c0_g2	0	0.075	8.75	8.594	3.21333e-05	0.00122935	Downregulated	RL10_DROME	Full=60S ribosomal protein L10	GO:0043025,GO:0007052,GO:0000022,GO:0006412,GO:0003735,GO:0051298,GO:0005840,GO:0051297,GO:0005737	Solyc06g007520.2.1	Ribosomal protein L10 IPR001197 Ribosomal protein L10e
TR55788_c0_g1	0	0.075	6.38	9.698	2.33279e-06	0.000166089	Downregulated	0	0	0	0	0
TR69931_c0_g1	0	0.075	6.365	7.239	6.39588e-06	0.000368593	Downregulated	0	0	0	0	0
TR9225_c0_g1	0	0.075	6.411	7.356	6.45896e-06	0.000371554	Downregulated	CRF1_ASPFU	Full=Probable glycosidase crf1	GO:0019863,GO:0005886,GO:0009277,GO:0005975,GO:0004553,GO:0005576,GO:0031225,GO:0071555	Solyc03g093130.2.1	Xyloglucan endotransglucosylase_hydrolase 9 IPR016455 Xyloglucan endotransglucosylase_hydrolase IPR008263 Glycoside hydrolase, family 16, active site
TR56646_c0_g1	0	0.075	6.38	6.416	3.88682e-06	0.000246844	Downregulated	P2P_LACPA	Full=PII-type proteinase	GO:0005618,GO:0016020,GO:0005576,GO:0004252	Solyc09g064490.1.1	Subtilisin-like protease IPR015500 Peptidase S8, subtilisin-related
TR34242_c0_g1	0	0.075	4.578	4.497	2.58406e-05	0.00103263	Downregulated	0	0	0	Solyc10g012440.1.1	Unknown Protein
TR11118_c0_g1	0	0.068	7.5	10.09	5.63437e-07	5.3567e-05	Downregulated	TCTP_PLUXY	Full=Translationally-controlled tumor protein homolog	GO:0005737	Solyc01g099770.2.1	Translationally-controlled tumor protein homolog IPR001983 Translationally controlled tumour-associated TCTP
TR686_c0_g1	0	0.068	7.009	5.123	3.75808e-06	0.000240005	Downregulated	0	0	0	Solyc05g055080.1.1	Unknown Protein
TR15339_c0_g1	0	0.068	4.463	5.069	2.78607e-05	0.00109627	Downregulated	ATC1_ANOGA	Full=Calcium-transporting ATPase sarcoplasmic/endoplasmic reticulum type	GO:0033017,GO:0016021,GO:0005524,GO:0046872,GO:0005388	Solyc07g022790.2.1	Calcium-transporting ATPase IPR000695 ATPase, P-type, H+ transporting proton pump
TR2889_c0_g1	0	0.068	3.665	3.588	6.72008e-05	0.00215289	Downregulated	PPO2_DROME	Full=Phenoloxidase 2	GO:0004503,GO:0035011,GO:0005576,GO:0042417,GO:0035006,GO:0005615,GO:0036264,GO:0036263,GO:0042438,GO:0050830,GO:0046872,GO:0050832	0	0
TR43511_c0_g1	0	0.061	4.501	5.656	8.1012e-06	0.00043162	Downregulated	TAP_STRLI	Full=Tripeptidyl aminopeptidase {ECO:0000303|PubMed:7487044}	GO:0045148,GO:0006508,GO:0005576	0	0
TR41221_c0_g1	0	0.061	3.021	3.353	0.000111423	0.00309819	Downregulated	DHE3_DROME	Full=Glutamate dehydrogenase, mitochondrial	GO:0005524,GO:0005525,GO:0005737,GO:0004353,GO:0004352,GO:0005759,GO:0005739,GO:0042802,GO:0006536,GO:0005829,GO:0006116	Solyc06g033860.1.1	Glutamate dehydrogenase IPR014362 Glutamate dehydrogenase
TR1842_c0_g1	0	0.054	12.392	13.584	6.9163e-09	1.94354e-06	Downregulated	RSB1_YEAS8	Full=Sphingoid long-chain base transporter RSB1	GO:0005886,GO:0016021,GO:0006950,GO:0006869	0	0
TR21592_c0_g1	0	0.054	6.963	7.481	5.63408e-07	5.3567e-05	Downregulated	CP6D5_DROME	Full=Probable cytochrome P450 6d5	GO:0004497,GO:0020037,GO:0016705,GO:0005789,GO:0005506	Solyc07g062500.2.1	Cytochrome P450
TR27926_c0_g1	0	0.054	6.664	6.651	7.19457e-07	6.49549e-05	Downregulated	CP6A1_MUSDO	Full=Cytochrome P450 6A1	GO:0070330,GO:0005789,GO:0005506,GO:0020037	Solyc10g051020.1.1	Cytochrome P450
TR42921_c1_g1	0	0.054	4.417	5.648	3.91168e-06	0.000247433	Downregulated	0	0	0	0	0
TR55835_c0_g1	0	0.054	4.041	4.638	1.33721e-05	0.000630931	Downregulated	STI1_YEAST	Full=Heat shock protein STI1	GO:0005737,GO:0051879,GO:0043086,GO:0042030,GO:0003729,GO:0030544,GO:0006457,GO:0008104	Solyc08g079170.2.1	Stress-induced protein sti1-like protein IPR011990 Tetratricopeptide-like helical
TR38799_c0_g1	0	0.054	3.497	2.468	7.03064e-05	0.00224148	Downregulated	FBX11_RAT	Full=F-box only protein 11	GO:0008270,GO:0000151,GO:0007605,GO:0004842,GO:0005737,GO:0005730,GO:0005694,GO:0016274	0	0
TR16734_c0_g1	0	0.047	7.362	7.834	1.22609e-07	1.62901e-05	Downregulated	0	0	0	0	0
TR61487_c0_g1	0	0.047	4.593	4.771	6.07585e-06	0.000354655	Downregulated	ATC1_DROME	Full=Calcium-transporting ATPase sarcoplasmic/endoplasmic reticulum type	GO:0016529,GO:1901896,GO:0016021,GO:0030322,GO:0051282,GO:0007629,GO:0048863,GO:0007274,GO:0046872,GO:0060047,GO:0010884,GO:0008610,GO:0006874,GO:0005811,GO:0006635,GO:0033017,GO:0036335,GO:0005635,GO:0012505,GO:0005524,GO:0005783,GO:0005388	Solyc01g096190.2.1	Calcium-transporting ATPase IPR005782 ATPase, P-type, calcium-transporting
TR18017_c0_g1	0	0.047	3.942	4.191	3.19075e-06	0.000211081	Downregulated	SREBP_SCHPO	Full=Processed sterol regulatory element-binding protein 1	GO:0008202,GO:1900413,GO:0005634,GO:0032936,GO:0032933,GO:0000978,GO:0072592,GO:0001077,GO:0035961,GO:0000122,GO:0010630,GO:0061419,GO:0006366,GO:0071458,GO:0003677,GO:0001078,GO:0045944,GO:0071456	0	0
TR43499_c0_g1	0	0.007	4.317	6.972	3.01922e-06	0.000202262	Downregulated	0	0	0	0	0
TR68893_c0_g1	256.307	0	0.222	0	0.000113014	0.00312873	Upregulated	0	0	0	0	0
TR18171_c1_g1	1.865	0	25.168	25.868	5.11888e-08	8.2931e-06	Downregulated	YCX91_PHAAO	Full=Uncharacterized protein ORF91	GO:0009507	Solyc01g007730.2.1	ORF91
TR18171_c1_g3	1.865	0	15.367	24.027	7.71923e-07	6.8473e-05	Downregulated	YCX91_PHAAO	Full=Uncharacterized protein ORF91	GO:0009507	Solyc01g007730.2.1	ORF91
TR18171_c1_g4	1.865	0	8.681	10.356	1.85975e-05	0.000804557	Downregulated	YCX91_PHAAO	Full=Uncharacterized protein ORF91	GO:0009507	Solyc01g007730.2.1	ORF91
TR28408_c0_g1	0	0	8.903	9.667	3.33558e-05	0.00126247	Downregulated	G3P_GLOMM	Full=Glyceraldehyde-3-phosphate dehydrogenase	GO:0051287,GO:0005737,GO:0004365,GO:0050661,GO:0015630,GO:0006006,GO:0006096	Solyc10g005510.2.1	Glyceraldehyde-3-phosphate dehydrogenase IPR000173 Glyceraldehyde 3-phosphate dehydrogenase
TR50223_c0_g1	0	0	10.452	10.67	4.14879e-05	0.00148532	Downregulated	GUN4_THEFU	Full=Endoglucanase E-4	GO:0030245,GO:0008810,GO:0030248	Solyc02g014220.2.1	Endoglucanase 1 IPR001701 Glycoside hydrolase, family 9
TR50431_c0_g1	0	0	18.442	18.496	7.69416e-09	2.05311e-06	Downregulated	0	0	0	0	0
TR28409_c0_g1	0	0	11.472	12.981	9.30627e-09	2.32686e-06	Downregulated	LRP5_HUMAN	Full=Low-density lipoprotein receptor-related protein 5	GO:0008217,GO:0006897,GO:0061178,GO:0006007,GO:0005739,GO:0005886,GO:0008284,GO:0060828,GO:0042074,GO:0033690,GO:0035426,GO:0035019,GO:0005783,GO:0044332,GO:0045840,GO:0002076,GO:0043235,GO:0042632,GO:0042733,GO:0060764,GO:0042813,GO:0042981,GO:0060612,GO:0045893,GO:0002053,GO:0061304,GO:0045668,GO:0045600,GO:0060349,GO:0001702,GO:0045944,GO:0048539,GO:0060070,GO:0008203,GO:0046849,GO:0046850,GO:…	0	0
TR17646_c0_g1	0	0	10.544	8.625	1.98439e-08	4.03925e-06	Downregulated	ATPA_DROME	Full=ATP synthase subunit alpha, mitochondrial	GO:0007286,GO:1902769,GO:0022900,GO:0015986,GO:0006909,GO:0005524,GO:0005875,GO:0046961,GO:0046933,GO:0005811,GO:0045261,GO:0015991,GO:0005743,GO:0040007,GO:0005739,GO:0019915	Solyc00g042130.1.1	ATP synthase subunit alpha IPR005294 ATPase, F1 complex, alpha subunit
TR62989_c0_g1	0	0	11.388	15.605	8.40319e-07	7.21175e-05	Downregulated	0	0	0	0	0
TR62097_c0_g1	0	0	8.497	8.343	6.50855e-07	5.93887e-05	Downregulated	SUBF_BACSU	Full=Bacillopeptidase F	GO:0004252,GO:0005576	Solyc09g007300.1.1	Subtilisin-like protein serine protease-like protein IPR015500 Peptidase S8, subtilisin-related
TR37277_c1_g1	0	0	10.72	15.848	4.92421e-07	4.84098e-05	Downregulated	0	0	0	0	0
TR42011_c0_g1	0	0	8.052	9.518	3.43177e-07	3.74476e-05	Downregulated	0	0	0	0	0
TR37368_c0_g1	0	0	13.435	18.903	7.2004e-07	6.49549e-05	Downregulated	CU01_ANOGA	Full=Cuticle protein	GO:0042302	0	0
TR3398_c0_g3	0	0	12.776	12.73	4.72928e-07	4.6783e-05	Downregulated	TPS3_SOLLC	Full=(-)-camphene/tricyclene synthase, chloroplastic	GO:0050551,GO:0050552,GO:0016114,GO:0009507,GO:0000287	Solyc01g105890.2.1	(E)-beta-ocimene synthase IPR005630 Terpene synthase, metal-binding domain
TR8011_c0_g1	0	0	10.697	10.255	5.58821e-07	5.34482e-05	Downregulated	GEL2_ASPFU	Full=1,3-beta-glucanosyltransferase gel2	GO:0005975,GO:0005886,GO:0009277,GO:0031505,GO:0031225,GO:0042123,GO:0042124	0	0
TR7103_c0_g1	0	0	11.388	19.037	1.668e-06	0.00012641	Downregulated	0	0	0	0	0
TR43981_c0_g1	0	0	18.358	16.467	9.27545e-07	7.83332e-05	Downregulated	TBA1_CHICK	Full=Tubulin alpha-1 chain	GO:0051258,GO:0007017,GO:0005200,GO:0005525,GO:0005874,GO:0005737,GO:0003924	Solyc04g077020.2.1	Tubulin alpha-3 chain IPR002452 Alpha tubulin
TR31784_c0_g1	0	0	7.538	14.947	2.36647e-06	0.000168109	Downregulated	0	0	0	0	0
TR18979_c0_g1	0	0	5.797	6.181	1.01502e-06	8.37167e-05	Downregulated	SSPO_BOVIN	Full=SCO-spondin	GO:0030414,GO:0030154,GO:0007399,GO:0007155,GO:0005615	0	0
TR50646_c2_g2	0	0	22.062	21.716	1.34769e-06	0.000107524	Downregulated	ERF25_ARATH	Full=Ethylene-responsive transcription factor ERF025	GO:0009873,GO:0006351,GO:0050832,GO:0044212,GO:0005634,GO:0003700	Solyc06g035700.1.1	Ethylene-responsive transcription factor 1 IPR001471 Pathogenesis-related transcriptional factor and ERF, DNA-binding
TR9192_c1_g1	0	0	8.336	8.382	2.05094e-06	0.000150031	Downregulated	0	0	0	0	0
TR17607_c0_g1	0	0	23.818	13.075	1.00231e-05	0.000512516	Downregulated	0	0	0	Solyc00g010530.1.1	Unknown Protein
TR48754_c0_g1	0	0	19.47	24.27	3.21597e-06	0.000212307	Downregulated	0	0	0	0	0
TR22607_c0_g1	0	0	5.452	7.763	1.72101e-06	0.00012872	Downregulated	EF1G_ARTSA	Full=Elongation factor 1-gamma	GO:0003746	Solyc11g028100.1.1	Elongation factor 1-gamma IPR001662 Translation elongation factor EF1B, gamma chain, conserved
TR62970_c0_g1	0	0	18.834	16.31	1.75035e-06	0.000130471	Downregulated	0	0	0	0	0
TR24916_c0_g1	0	0	8.374	13.271	3.90249e-06	0.000247345	Downregulated	0	0	0	0	0
TR12167_c0_g1	0	0	13.558	11.156	2.22783e-06	0.000160414	Downregulated	0	0	0	0	0
TR63817_c0_g1	0	0	13.642	13.631	2.29539e-06	0.000163793	Downregulated	PLA14_ARATH	Full=Phospholipase A1-Ibeta2, chloroplastic	GO:0047714,GO:0016042,GO:0008970,GO:0004806,GO:0009507	Solyc06g060870.1.1	Lipase-like protein IPR002921 Lipase, class 3
TR3731_c0_g1	0	0	4.762	8.241	7.43733e-06	0.00040858	Downregulated	YG37_YEAST	Full=Uncharacterized protein YGR127W	0	Solyc02g021340.2.1	Ser_Thr-rich protein T10 in DGCR region IPR008551 Protein of unknown function DUF833
TR5688_c0_g1	0	0	4.862	7.137	4.54134e-06	0.000275728	Downregulated	0	0	0	0	0
TR64722_c0_g1	0	0	17.407	15.496	3.47715e-06	0.000225795	Downregulated	0	0	0	0	0
TR58646_c0_g3	0	0	11.633	4.857	2.89807e-05	0.00113332	Downregulated	MLC1_DROVI	Full=Myosin light chain alkali	GO:0005859,GO:0005509	Solyc01g008950.2.1	Calmodulin 5_6_7_8-like protein IPR011992 EF-Hand type
TR35959_c0_g2	0	0	8.941	10.145	5.18861e-06	0.000310281	Downregulated	EGLD_ASPTN	Full=Probable endo-beta-1,4-glucanase D	GO:0030248,GO:0030245,GO:0008810,GO:0005576	0	0
TR30330_c0_g2	0	0	6.909	6.51	6.03873e-06	0.000353138	Downregulated	PTR2_SCHPO	Full=Probable peptide transporter ptr2	GO:0035443,GO:0000324,GO:0071916,GO:0035442,GO:0015031,GO:0042937,GO:0032153,GO:0042936,GO:0005887,GO:0031520	Solyc09g014230.1.1	Peptide transporter IPR000109 TGF-beta receptor, type I_II extracellular region
TR13997_c0_g1	0	0	8.696	8.053	7.34553e-06	0.000404948	Downregulated	ERF21_ARATH	Full=Ethylene-responsive transcription factor ERF021	GO:0009873,GO:0005634,GO:0006351,GO:0003700,GO:0003677	Solyc11g042580.1.1	Ethylene-responsive transcription factor 4 IPR001471 Pathogenesis-related transcriptional factor and ERF, DNA-binding
TR15953_c0_g1	0	0	7.569	12.26	1.19202e-05	0.000579653	Downregulated	CUDP_METAN	Full=Cuticle-degrading protease	GO:0005576,GO:0004252	0	0
TR32861_c0_g1	0	0	4.317	3.032	1.07052e-05	0.000534308	Downregulated	0	0	0	0	0
TR39790_c0_g1	0	0	8.474	10.286	1.1797e-05	0.000576313	Downregulated	GAP1_YEAST	Full=General amino-acid permease GAP1	GO:0015823,GO:0015203,GO:1902047,GO:0015192,GO:0035524,GO:0030134,GO:0005771,GO:0015171,GO:0005768,GO:0015846,GO:0006865,GO:0005886,GO:0000328,GO:0015193,GO:0005887	0	0
TR16663_c0_g1	0	0	8.497	10.568	1.21994e-05	0.000588042	Downregulated	TNNT_DROME	Full=Troponin T, skeletal muscle	GO:0005861,GO:0005509,GO:0006874,GO:0048644,GO:0005865,GO:0030240,GO:0046716,GO:0045214,GO:0030239,GO:0007498,GO:0007005,GO:0006937	0	0
TR16941_c0_g1	0	0	9.363	11.759	1.22011e-05	0.000588042	Downregulated	YM67_CAEEL	Full=Putative serine protease K12H4.7	GO:0045087,GO:0008236	Solyc09g010220.2.1	Lysosomal Pro-X carboxypeptidase IPR008758 Peptidase S28
TR41529_c0_g1	0	0	7.162	7.787	1.59157e-05	0.000717878	Downregulated	0	0	0	0	0
TR23598_c0_g1	0	0	8.566	8.704	1.94017e-05	0.000828069	Downregulated	0	0	0	0	0
TR67353_c0_g1	0	0	11.855	15.37	2.23796e-05	0.000920521	Downregulated	EF1A_BLAHO	Full=Elongation factor 1-alpha	GO:0005737,GO:0005525,GO:0003924,GO:0003746	Solyc06g009970.2.1	Elongation factor 1-alpha IPR004539 Translation elongation factor EF1A, eukaryotic and archaeal IPR000795 Protein synthesis factor, GTP-binding
TR41553_c0_g2	0	0	6.879	6.001	3.00168e-05	0.00116238	Downregulated	0	0	0	0	0
TR60799_c0_g1	0	0	6.61	8.21	8.35146e-06	0.00043906	Downregulated	AFC3_ARATH	Full=Serine/threonine-protein kinase AFC3	GO:0005524,GO:0004712,GO:0004674,GO:0046777	Solyc06g074700.2.1	Serine_threonine protein kinase IPR002290 Serine_threonine protein kinase
TR18093_c0_g1	0	0	5.138	5.163	7.50253e-06	0.000409437	Downregulated	VCP_AEDAE	Full=Vitellogenic carboxypeptidase	GO:0004185,GO:0005576	Solyc09g007640.2.1	Serine carboxypeptidase IPR001563 Peptidase S10, serine carboxypeptidase
TR38101_c0_g1	0	0	7.001	5.061	3.86743e-05	0.00141319	Downregulated	0	0	0	0	0
TR48740_c0_g1	0	0	4.731	6.071	8.83825e-06	0.000460082	Downregulated	LAP2_TRIVH	Full=Probable leucine aminopeptidase 2	GO:0005576,GO:0004177,GO:0008237,GO:0009405,GO:0046872	0	0
TR16713_c0_g1	0	0	6.817	7.058	9.13869e-06	0.000472622	Downregulated	SUBV_BACSU	Full=Minor extracellular protease vpr	GO:0005576,GO:0004252	Solyc02g072370.1.1	Subtilisin-like protease IPR015500 Peptidase S8, subtilisin-related
TR56058_c0_g1	0	0	5.506	12.072	4.9574e-05	0.0017046	Downregulated	URHG2_BACSU	Full=Unsaturated rhamnogalacturonyl hydrolase YteR	GO:0016798,GO:0005737	0	0
TR56940_c0_g2	0	0	4.149	3.635	1.24435e-05	0.000596303	Downregulated	YHDC_SCHPO	Full=Uncharacterized transporter C1683.12	GO:0035353,GO:1903222,GO:0016021,GO:0005783,GO:0015890,GO:0005887,GO:0015663	Solyc00g034000.1.1	Permease of the major facilitator superfamily IPR016196 Major facilitator superfamily, general substrate transporter
TR6231_c0_g2	0	0	5.069	7.81	1.84022e-05	0.000797194	Downregulated	0	0	0	0	0
TR58992_c0_g1	0	0	8.343	7.387	1.21678e-05	0.000588042	Downregulated	0	0	0	0	0
TR10698_c0_g1	0	0	9.946	7.004	2.04977e-05	0.000866691	Downregulated	GEL2_ASPFU	Full=1,3-beta-glucanosyltransferase gel2	GO:0005975,GO:0005886,GO:0009277,GO:0031505,GO:0031225,GO:0042123,GO:0042124	0	0
TR47188_c0_g1	0	0	6.794	6.886	1.40745e-05	0.000654352	Downregulated	DRE1F_ARATH	Full=Dehydration-responsive element-binding protein 1F	GO:0006351,GO:0044212,GO:0010371,GO:0048510,GO:0009414,GO:0050826,GO:0009408,GO:0005634,GO:0043565,GO:0016049,GO:0003700	Solyc12g056430.1.1	Ethylene-responsive transcription factor 10 IPR001471 Pathogenesis-related transcriptional factor and ERF, DNA-binding
TR41170_c0_g1	0	0	6.273	5.687	1.50648e-05	0.000686326	Downregulated	PTR2_SCHPO	Full=Probable peptide transporter ptr2	GO:0035443,GO:0000324,GO:0071916,GO:0035442,GO:0015031,GO:0042937,GO:0032153,GO:0042936,GO:0005887,GO:0031520	Solyc07g008520.2.1	Peptide transporter IPR000109 TGF-beta receptor, type I_II extracellular region
TR22543_c0_g1	0	0	2.538	4.755	3.64832e-05	0.00135496	Downregulated	PUT4_SCHPO	Full=Probable proline-specific permease put4	GO:0005783,GO:0005887,GO:0015193,GO:0005773,GO:0003333,GO:0005886,GO:0005794,GO:0015297,GO:0035524	0	0
TR67066_c0_g1	0	0	3.796	5.719	2.59398e-05	0.00103263	Downregulated	LACP_KLULA	Full=Lactose permease	GO:0016021,GO:0008643,GO:0015293,GO:0022891	Solyc01g008240.2.1	Solute carrier family 2, facilitated glucose transporter member 3 IPR003663 Sugar_inositol transporter
TR32597_c0_g1	0	0	4.034	6.087	2.59194e-05	0.00103263	Downregulated	0	0	0	0	0
TR24298_c0_g2	0	0	7.185	9.714	2.13061e-05	0.000890237	Downregulated	ATPB_NEUCR	Full=ATP synthase subunit beta, mitochondrial	GO:0043531,GO:0046933,GO:0042776,GO:0015991,GO:0005524,GO:0005754	Solyc05g008460.2.1	ATP synthase subunit beta IPR005722 ATPase, F1 complex, beta subunit
TR18524_c0_g1	0	0	4.793	8.288	3.54828e-05	0.00133025	Downregulated	0	0	0	0	0
TR6316_c0_g1	0	0	6.411	5.507	1.87797e-05	0.00080913	Downregulated	HEM6_SCHPO	Full=Probable oxygen-dependent coproporphyrinogen-III oxidase	GO:0071456,GO:0042803,GO:0006783,GO:0006782,GO:0005829,GO:0005634,GO:0004109	Solyc10g005110.2.1	Coproporphyrinogen III oxidase aerobic IPR001260 Coproporphyrinogen III oxidase
TR62109_c0_g1	0	0	5.713	15.793	0.000184022	0.00460033	Downregulated	0	0	0	0	0
TR10367_c0_g1	0	0	5.782	5.131	2.19685e-05	0.000908318	Downregulated	CHIT3_DROME	Full=Probable chitinase 3	GO:0006032,GO:0000272,GO:0005737,GO:0004568,GO:0005576,GO:0008061	0	0
TR8059_c0_g1	0	0	5.023	3.94	2.57187e-05	0.00103263	Downregulated	LMLN_DROME	Full=Leishmanolysin-like peptidase	GO:0007420,GO:0007052,GO:0016020,GO:0019915,GO:0008354,GO:0007076,GO:0008233,GO:0007444,GO:0051298,GO:0006338,GO:0004222,GO:0022900,GO:0046872,GO:0045842,GO:0008406,GO:0051301,GO:0007155,GO:1902769,GO:0005737,GO:0031252,GO:0007100	Solyc04g079900.2.1	GP63 leishmanolysin (Metallo-peptidase clan ma(M) family m8) IPR001577 Peptidase M8, leishmanolysin
TR455_c0_g1	0	0	10.314	7.27	3.70221e-05	0.00136832	Downregulated	BH092_ARATH	Full=Transcription factor bHLH92	GO:0006351,GO:0005634,GO:0006355,GO:0003700,GO:0003677	Solyc09g083360.2.1	Basic helix-loop-helix protein IPR011598 Helix-loop-helix DNA-binding
TR42938_c0_g1	0	0	5.115	5.358	2.61916e-05	0.00103961	Downregulated	0	0	0	0	0
TR60904_c0_g1	0	0	8.972	8.719	3.29673e-05	0.0012537	Downregulated	CU12_HYACE	Full=Flexible cuticle protein 12	GO:0042302	0	0
TR60066_c0_g1	0	0	3.75	6.071	5.71428e-05	0.00190001	Downregulated	PAX6_CHICK	Full=Paired box protein Pax-6	GO:0007224,GO:0000978,GO:0001709,GO:0023019,GO:0030858,GO:0042593,GO:0009950,GO:0009786,GO:0030334,GO:0009611,GO:0042462,GO:0000790,GO:0021983,GO:0007435,GO:0021778,GO:0005654,GO:0003682,GO:0007411,GO:0033365,GO:0005737,GO:0021796,GO:0021913,GO:0030216,GO:0000132,GO:0021918,GO:0021797,GO:0001568,GO:0021912,GO:0003322,GO:0061072,GO:0061303,GO:0060041,GO:0048505,GO:0045665,GO:0048596,GO:0050680,GO:…	Solyc02g085630.2.1	Homeobox-leucine zipper-like protein IPR001356 Homeobox
TR29791_c0_g1	0	0	10.452	11.774	3.33569e-05	0.00126247	Downregulated	PMA1_NEUCR	Full=Plasma membrane ATPase	GO:0005886,GO:0006754,GO:0008553,GO:0005524,GO:0046872,GO:0016021	Solyc07g005040.2.1	H-ATPase IPR006534 ATPase, P-type, plasma-membrane proton-efflux
TR64680_c0_g1	0	0	4.432	5.719	3.6923e-05	0.00136649	Downregulated	AMPN_MANSE	Full=Aminopeptidase N	GO:0005886,GO:0004177,GO:0008270,GO:0031225,GO:0008237	Solyc08g062630.2.1	Aminopeptidase-like protein IPR015568 Peptidase M1, puromycin-sensitive aminopeptidase
TR58692_c0_g1	0	0	9.202	8.163	4.34274e-05	0.00153563	Downregulated	G3PC_GINBI	Full=Glyceraldehyde-3-phosphate dehydrogenase, cytosolic	GO:0006096,GO:0006006,GO:0004365,GO:0005737,GO:0050661,GO:0051287	Solyc06g071920.2.1	Glyceraldehyde-3-phosphate dehydrogenase IPR000173 Glyceraldehyde 3-phosphate dehydrogenase
TR54455_c0_g1	0	0	4.54	4.63	4.15437e-05	0.00148556	Downregulated	0	0	0	Solyc04g016080.1.1	Kinesin-like protein IPR001752 Kinesin, motor region
TR41164_c0_g2	0	0	4.938	4.951	4.141e-05	0.00148532	Downregulated	HSP72_SCHPO	Full=Probable heat shock protein ssa2	GO:0061077,GO:0005524,GO:0005829,GO:1900035,GO:0016887,GO:0006457,GO:0005634,GO:0051082,GO:0042026	Solyc06g076020.2.1	heat shock protein IPR013126 Heat shock protein 70
TR58121_c0_g1	0	0	4.624	4.199	4.30509e-05	0.00152401	Downregulated	ATPG_DROME	Full=ATP synthase subunit gamma, mitochondrial	GO:0005811,GO:0045261,GO:0005743,GO:0005739,GO:0015986,GO:0006909,GO:0046933,GO:0046961	Solyc03g115110.2.1	ATP synthase gamma chain IPR000131 ATPase, F1 complex, gamma subunit
TR48873_c0_g1	0	0	4.624	6.228	5.05649e-05	0.00173208	Downregulated	JEN1_YEAST	Full=Carboxylic acid transporter protein homolog	GO:0097080,GO:0097079,GO:0016021,GO:0035879,GO:0015992,GO:0005886,GO:0015355,GO:0015144,GO:0006849	Solyc00g031050.1.1	Major facilitator family transporter IPR016196 Major facilitator superfamily, general substrate transporter
TR19771_c0_g2	0	0	2.27	4.646	0.000130071	0.00350005	Downregulated	BIP5_TOBAC	Full=Luminal-binding protein 5	GO:0005524,GO:0005788	Solyc03g082920.2.1	Heat shock protein IPR013126 Heat shock protein 70
TR71088_c0_g1	0	0	8.159	6.534	6.1076e-05	0.00200559	Downregulated	0	0	0	0	0
TR55306_c0_g1	0	0	6.464	5.249	6.05589e-05	0.00199273	Downregulated	RSSA_ANOGA	Full=40S ribosomal protein SA {ECO:0000255|HAMAP-Rule:MF_03015}	GO:0022627,GO:0000028,GO:0006412,GO:0003735	Solyc03g019780.2.1	40S ribosomal protein SA IPR005707 Ribosomal protein S2, eukaryotic_archaeal
TR21888_c0_g1	0	0	5	7.967	8.71236e-05	0.00258875	Downregulated	0	0	0	0	0
TR33576_c0_g1	0	0	6.342	5.217	5.87496e-05	0.00194529	Downregulated	CDH_PHACH	Full=Cellobiose dehydrogenase	GO:0047735,GO:0050660,GO:0046872,GO:0030245,GO:0005576	0	0
TR69380_c0_g1	0	0	7.239	7.873	5.33232e-05	0.00179939	Downregulated	0	0	0	0	0
TR58715_c0_g1	0	0	7.078	8.884	5.92426e-05	0.00195753	Downregulated	PDI_DROME	Full=Protein disulfide-isomerase	GO:0034976,GO:0006457,GO:0005811,GO:0019511,GO:1902175,GO:0045454,GO:0005737,GO:0012505,GO:0005791,GO:0005635,GO:0005783,GO:0070732,GO:0045169,GO:0005615,GO:0003756,GO:0043025,GO:0005788,GO:0048471,GO:0060187	Solyc04g049450.2.1	Protein disulfide isomerase L-2 IPR005792 Protein disulphide isomerase
TR17909_c0_g2	0	0	2.454	6.635	0.000434636	0.00881317	Downregulated	YOOH_SCHPO	Full=Putative xanthine/uracil permease C887.17	GO:0016021,GO:0005794,GO:0005345,GO:0000139	Solyc06g050250.1.1	Xanthine_uracil permease family protein IPR006043 Xanthine_uracil_vitamin C permease
TR35959_c0_g1	0	0	5.215	6.761	7.82586e-05	0.0024103	Downregulated	EGLD_ASPTN	Full=Probable endo-beta-1,4-glucanase D	GO:0030248,GO:0030245,GO:0008810,GO:0005576	0	0
TR29764_c0_g1	0	0	6.004	9.268	0.000101667	0.002885	Downregulated	EF2_DROME	Full=Elongation factor 2	GO:0007052,GO:0005525,GO:0000022,GO:0006414,GO:0003924,GO:0003746,GO:0005875,GO:0005829,GO:0005811	Solyc08g062920.2.1	Elongation factor EF-2 IPR000795 Protein synthesis factor, GTP-binding
TR16924_c0_g2	0	0	4.501	2.867	0.000126829	0.00342168	Downregulated	VA5_VESMG	Full=Venom allergen 5 {ECO:0000250|UniProtKB:P81657}	GO:0005576	Solyc08g068990.1.1	Pathogenesis-related protein 1 IPR002413 Ves allergen
TR55664_c0_g1	0	0	4.739	5.766	9.24606e-05	0.00270101	Downregulated	EF112_ARATH	Full=Ethylene-responsive transcription factor ERF112	GO:0006351,GO:0005634,GO:0003677,GO:0003700,GO:0009873	Solyc02g090770.1.1	Ethylene responsive transcription factor 2b IPR001471 Pathogenesis-related transcriptional factor and ERF, DNA-binding
TR9179_c0_g1	0	0	4.969	4.575	8.89881e-05	0.00262858	Downregulated	WAXSA_ARATH	Full=Putative long-chain-alcohol O-fatty-acyltransferase 10	GO:0047196,GO:0016021,GO:0006629	Solyc11g012220.1.1	Wax synthase isoform 3
TR2929_c0_g1	0	0	8.872	9.557	8.50398e-05	0.00253554	Downregulated	NPC2_CANFA	Full=Epididymal secretory protein E1	GO:0032367,GO:0030301,GO:0015485,GO:0005576,GO:0008203,GO:0005764,GO:0005783,GO:0033344	0	0
TR15823_c0_g1	0	0	10.207	5.045	0.000347453	0.00743599	Downregulated	ATPB_DROME	Full=ATP synthase subunit beta, mitochondrial	GO:0046331,GO:0046933,GO:0045261,GO:0005524,GO:0005739,GO:0005811,GO:0005743,GO:0015991,GO:0015986	Solyc05g008460.2.1	ATP synthase subunit beta IPR005722 ATPase, F1 complex, beta subunit
TR55067_c0_g1	0	0	7.293	10.866	0.000151102	0.00393932	Downregulated	0	0	0	0	0
TR27712_c0_g1	0	0	7.408	4.434	0.000250549	0.00575265	Downregulated	SC61A_HARAN	Full=Protein transport protein Sec61 subunit alpha	GO:0030176,GO:0045047	Solyc10g007390.2.1	Protein transport protein SEC61 alpha subunit IPR002208 SecY protein
TR30301_c0_g1	0	0	6.38	6.204	0.000111819	0.00310376	Downregulated	PDI_DROME	Full=Protein disulfide-isomerase	GO:0034976,GO:0006457,GO:0005811,GO:0019511,GO:1902175,GO:0045454,GO:0005737,GO:0012505,GO:0005791,GO:0005635,GO:0005783,GO:0070732,GO:0045169,GO:0005615,GO:0003756,GO:0043025,GO:0005788,GO:0048471,GO:0060187	Solyc11g069400.1.1	Protein disulfide isomerase L-2 IPR005792 Protein disulphide isomerase
TR52085_c0_g1	0	0	5.084	7.701	0.000156317	0.00404651	Downregulated	Y1315_MYCBO	Full=Uncharacterized protein Mb1315	GO:0008270,GO:0004089	Solyc02g086820.2.1	Carbonic anhydrase IPR015892 Carbonic anhydrase, prokaryotic-like, conserved site
TR21642_c0_g1	0	0	5.36	7.058	0.000124772	0.00338924	Downregulated	DSK1_SCHPO	Full=Protein kinase dsk1	GO:0046777,GO:0035556,GO:0044732,GO:0032153,GO:0004672,GO:0007067,GO:0005524,GO:0006468,GO:0004674,GO:0005829,GO:0005634,GO:0005737,GO:1900182,GO:1900181,GO:0046822,GO:0051301,GO:0050265,GO:0048026	Solyc11g066650.1.1	Kinase family protein IPR002290 Serine_threonine protein kinase
TR57400_c0_g1	0	0	5.03	9.119	0.000224068	0.00530975	Downregulated	SDHA_SCHPO	Full=Probable succinate dehydrogenase [ubiquinone] flavoprotein subunit, mitochondrial	GO:0006121,GO:0005739,GO:0005749,GO:0006099,GO:0050660,GO:0008177,GO:0006105	Solyc02g085350.2.1	Succinate dehydrogenase flavoprotein subunit IPR011281 Succinate dehydrogenase, flavoprotein subunit
TR68959_c0_g2	0	0	4.448	4.583	0.000139615	0.00369752	Downregulated	COCA1_HUMAN	Full=Collagen alpha-1(XII) chain	GO:0005615,GO:0005576,GO:0005595,GO:0070062,GO:0030020,GO:0022617,GO:0030198,GO:0007155,GO:1903561,GO:0001501,GO:0005788,GO:0035987,GO:0030199,GO:0031012,GO:0030574	0	0
TR64257_c0_g1	0	0	5.422	4.865	0.00014618	0.00382987	Downregulated	0	0	0	0	0
TR64321_c0_g1	0	0	9.854	7.521	0.000225556	0.00532972	Downregulated	G3P_CRYCU	Full=Glyceraldehyde-3-phosphate dehydrogenase	GO:0004365,GO:0050661,GO:0006096,GO:0006006,GO:0005737,GO:0051287	Solyc03g111010.2.1	Glyceraldehyde-3-phosphate dehydrogenase IPR000173 Glyceraldehyde 3-phosphate dehydrogenase
TR47192_c0_g1	0	0	4.624	4.912	0.000187087	0.00464122	Downregulated	PE1_ANOGA	Full=Peritrophin-1	GO:0006030,GO:0008061,GO:0005576	0	0
TR39279_c0_g1	0	0	4.317	4.591	0.000186854	0.00463906	Downregulated	CHIT3_DROME	Full=Probable chitinase 3	GO:0006032,GO:0000272,GO:0005737,GO:0004568,GO:0005576,GO:0008061	0	0
TR24459_c0_g1	0	0	3.688	2.374	0.000276105	0.00619169	Downregulated	0	0	0	0	0
TR56935_c0_g1	0	0	5.23	4.834	0.000189381	0.00466807	Downregulated	IF4A_DROME	Full=Eukaryotic initiation factor 4A	GO:0051297,GO:0005524,GO:0016281,GO:0007446,GO:0010501,GO:0005875,GO:0004004,GO:0072686,GO:0005829,GO:0048477,GO:0000022,GO:0003743,GO:0030718,GO:0003724,GO:0048132,GO:0043186,GO:0005813,GO:0002168,GO:0000381,GO:0005634,GO:0007279,GO:0007052,GO:0006974,GO:0006413,GO:0007067	Solyc12g096000.1.1	ATP-dependent RNA helicase eIF4A IPR011545 DNA_RNA helicase, DEAD_DEAH box type, N-terminal
TR4281_c0_g1	0	0	6.081	4.771	0.00021225	0.00511137	Downregulated	RL7A_DROME	Full=60S ribosomal protein L7a	GO:0003735,GO:0042254,GO:0000022,GO:0007052,GO:0005840,GO:0051298,GO:0051297	Solyc06g064470.2.1	Ribosomal protein L7a IPR001921 Ribosomal protein L7A
TR68603_c0_g1	0	0	3.972	4.293	0.000182951	0.00458518	Downregulated	0	0	0	0	0
TR61421_c0_g1	0	0	8.627	9.769	4.01775e-05	0.00145473	Downregulated	CUP7_DROME	Full=Pupal cuticle protein Edg-78E	GO:0031012,GO:0040003,GO:0008011,GO:0008010	0	0
TR145_c0_g1	0	0	5.038	6.659	4.6393e-05	0.00160826	Downregulated	Y3589_ARATH	Full=PTI1-like tyrosine-protein kinase At3g15890	GO:0005524,GO:0005886,GO:0004715	Solyc07g006610.2.1	Serine_threonine protein kinase IPR002290 Serine_threonine protein kinase
TR20087_c0_g1	0	0	3.934	5.304	6.43595e-05	0.00207479	Downregulated	APE3_YEAST	Full=Aminopeptidase Y	GO:0000324,GO:0007039,GO:0004177,GO:0046872,GO:0008237	Solyc11g045250.1.1	N-acetylated alpha-linked acidic dipeptidase 2 IPR007484 Peptidase M28
TR30499_c0_g1	0	0	4.77	9.119	0.000130713	0.00350538	Downregulated	UBB_PONPY	Full=Polyubiquitin-B	GO:0005634,GO:0005737	Solyc07g064130.1.1	Ubiquitin IPR019956 Ubiquitin subgroup
TR32335_c0_g1	0	0	8.826	7.552	5.63491e-05	0.00188348	Downregulated	CUD5_SCHGR	Full=Endocuticle structural glycoprotein SgAbd-5	GO:0042302	0	0
TR10542_c0_g1	0	0	3.313	5.413	9.03272e-05	0.00266319	Downregulated	OXDC_BACSU	Full=Oxalate decarboxylase OxdC	GO:0005737,GO:0045735,GO:0046872,GO:0046564	Solyc05g006500.2.1	Germin-like protein 5 IPR014710 RmlC-like jelly roll fold
TR59743_c0_g3	0	0	8.742	9.001	7.24836e-05	0.00227804	Downregulated	0	0	0	Solyc07g005280.2.1	Unknown Protein
TR67591_c0_g1	0	0	9.11	4.52	0.000220302	0.00525186	Downregulated	PLYE_EMENI	Full=Pectate lyase E	GO:0030570,GO:0005576,GO:0045490,GO:0071555	0	0
TR31480_c0_g1	0	0	5.92	10.286	0.000136378	0.00362998	Downregulated	0	0	0	0	0
TR51401_c0_g1	0	0	4.302	3.275	0.000116736	0.00321494	Downregulated	0	0	0	0	0
TR1999_c0_g1	0	0	3.942	3.596	7.38102e-05	0.00231119	Downregulated	SPRC_CAEEL	Full=SPARC	GO:0005615,GO:0005604,GO:0007275,GO:0005509,GO:0007165	0	0
TR69950_c0_g1	0	0	4.087	3.157	0.000115056	0.00317694	Downregulated	SSRA_BOVIN	Full=Translocon-associated protein subunit alpha	GO:0005789,GO:0016021	Solyc10g054880.1.1	Translocon-associated protein alpha subunit, alpha subunit
TR56543_c0_g1	0	0	7.362	4.763	0.000142626	0.00377098	Downregulated	PEB3_DROME	Full=Ejaculatory bulb-specific protein 3	GO:0045297,GO:0009615,GO:0007552,GO:0005576	0	0
TR60545_c0_g1	0	0	8.136	6.487	0.000111326	0.00309819	Downregulated	CEL6C_PODAN	Full=1,4-beta-D-glucan cellobiohydrolase CEL6C {ECO:0000305}	GO:0005576,GO:0016162,GO:0030245	0	0
TR51841_c0_g1	0	0	4.049	3.878	0.000100331	0.00285611	Downregulated	CPC1_NEUCR	Full=Cross-pathway control protein 1	GO:0043565,GO:0008652,GO:0003700,GO:0006351,GO:0005634	0	0
TR28256_c0_g1	0	0	3.949	4.505	0.000102488	0.00290054	Downregulated	MAS5_SCHPO	Full=Mitochondrial protein import protein mas5	GO:0042026,GO:0046872,GO:0051082,GO:0051087,GO:1900035,GO:0030544,GO:0000226,GO:0005634,GO:0005524,GO:0015031,GO:0009408,GO:0005829	Solyc05g055160.2.1	DNAJ chaperone IPR003095 Heat shock protein DnaJ
TR6810_c0_g1	0	0	5.238	5.977	0.000102426	0.00290054	Downregulated	HSP71_SOLLC	Full=Heat shock cognate 70 kDa protein 1	GO:0005524	Solyc06g076020.2.1	heat shock protein IPR013126 Heat shock protein 70
TR66031_c0_g1	0	0	2.914	3.322	0.000102357	0.00290054	Downregulated	LIP3_DROME	Full=Lipase 3	GO:0016042,GO:0016788	Solyc05g053750.1.1	Lipase IPR006693 AB-hydrolase associated lipase region
TR60365_c0_g2	0	0	4.011	2.773	0.00018513	0.0046143	Downregulated	0	0	0	0	0
TR21133_c0_g1	0	0	8.144	7.936	0.000100321	0.00285611	Downregulated	ATPB_DROME	Full=ATP synthase subunit beta, mitochondrial	GO:0046331,GO:0046933,GO:0045261,GO:0005524,GO:0005739,GO:0005811,GO:0005743,GO:0015991,GO:0015986	Solyc02g091130.2.1	ATP synthase subunit beta IPR005722 ATPase, F1 complex, beta subunit
TR70623_c0_g1	0	0	7.707	7.505	0.000100459	0.00285611	Downregulated	0	0	0	0	0
TR53644_c0_g1	0	0	5.353	2.883	0.000252779	0.0057913	Downregulated	RL23A_RAT	Full=60S ribosomal protein L23a	GO:0000166,GO:0000027,GO:0003735,GO:0019843,GO:0006412,GO:0044822,GO:0022625,GO:0005634	Solyc10g084610.1.1	60S ribosomal protein L23A IPR012678 Ribosomal protein L23_L15e, core
TR9421_c0_g1	0	0	4.386	2.969	0.000182519	0.00458158	Downregulated	QCR2_NEUCR	Full=Cytochrome b-c1 complex subunit 2, mitochondrial	GO:0046872,GO:0005743,GO:0070469,GO:0003824,GO:0055114	0	0
TR69858_c0_g1	0	0	4.44	4.403	0.000137787	0.00365901	Downregulated	0	0	0	0	0
TR15135_c0_g1	0	0	3.405	3.439	0.000137283	0.003651	Downregulated	HSP78_YEAST	Full=Heat shock protein 78, mitochondrial	GO:0000002,GO:0005524,GO:0005759,GO:0016887,GO:0051787,GO:0043335,GO:0050821,GO:0042026,GO:0034605	Solyc02g088610.2.1	ATP-dependent chaperone ClpB IPR017730 Chaperonin ClpB
TR54331_c0_g1	0	0	6.058	8.719	0.00017336	0.00438986	Downregulated	PLYA_ASPOR	Full=Probable pectate lyase A	GO:0071555,GO:0045490,GO:0030570,GO:0005576,GO:0046872	Solyc02g087670.2.1	Pectate lyase family protein IPR002022 Pectate lyase_Amb allergen
TR26495_c0_g1	0	0	5.636	4.881	0.000144335	0.00380034	Downregulated	0	0	0	0	0
TR16059_c0_g1	0	0	3.704	6.682	0.000255692	0.0058496	Downregulated	DHE4_GIBFU	Full=NADP-specific glutamate dehydrogenase	GO:0006520,GO:0004354	Solyc01g068210.2.1	Glutamate dehydrogenase IPR006095 Glutamate_phenylalanine_leucine_valine dehydrogenase
TR483_c1_g1	0	0	4.854	7.458	0.000262499	0.00595812	Downregulated	HSP7C_PETHY	Full=Heat shock cognate 70 kDa protein	GO:0005524	Solyc11g066100.1.1	heat shock protein IPR013126 Heat shock protein 70
TR58320_c0_g1	0	0	4.954	3.635	0.000228063	0.00536041	Downregulated	S61A2_PONAB	Full=Protein transport protein Sec61 subunit alpha isoform 2	GO:0015031,GO:0005789,GO:0016021	Solyc10g007390.2.1	Protein transport protein SEC61 alpha subunit IPR002208 SecY protein
TR32817_c0_g2	0	0	2.439	2.664	0.000188405	0.00465572	Downregulated	ALDH_ALTAL	Full=Aldehyde dehydrogenase	GO:0005737,GO:0004029,GO:0006068	Solyc08g068190.2.1	Aldehyde dehydrogenase IPR015590 Aldehyde dehydrogenase
TR3451_c0_g1	0	0	7.101	4.246	0.000290959	0.00646927	Downregulated	0	0	0	Solyc01g017490.1.1	Conserved protein
TR70660_c0_g1	0	0	2.232	4.317	0.000397617	0.00826479	Downregulated	GUNK_FUSOX	Full=Putative endoglucanase type K	GO:0030248,GO:0030245,GO:0005576,GO:0008810	0	0
TR24425_c0_g1	0	0	6.533	5.037	0.000297619	0.00657203	Downregulated	0	0	0	Solyc03g113420.2.1	Peptide transporter IPR000109 TGF-beta receptor, type I_II extracellular region
TR64212_c0_g1	0	0	5.414	5.131	0.000261838	0.00594735	Downregulated	0	0	0	0	0
TR28548_c0_g2	0	0	2.561	4.317	0.000408463	0.00844825	Downregulated	SND1_DANRE	Full=Staphylococcal nuclease domain-containing protein 1	GO:0003712,GO:0003676,GO:0004518,GO:0016442,GO:0005737,GO:0035194	Solyc03g118020.2.1	Tudor _ nuclease domain-containing protein IPR016685 RNA-induced silencing complex, nuclease component Tudor-SN
TR17105_c0_g1	0	0	3.834	3.008	0.000291335	0.00646927	Downregulated	0	0	0	0	0
TR57481_c0_g1	0	0	4.532	5.335	0.000271365	0.00610697	Downregulated	0	0	0	0	0
TR42834_c0_g1	0	0	5.084	8.774	0.000409466	0.00845484	Downregulated	0	0	0	0	0
TR7566_c0_g1	0	0	2.814	4.019	0.000322741	0.00701459	Downregulated	0	0	0	0	0
TR31838_c0_g1	0	0	4.141	6.024	0.000326697	0.00706675	Downregulated	0	0	0	0	0
TR12621_c0_g1	0	0	4.601	5.648	0.00027602	0.00619169	Downregulated	CEL1_AGABI	Full=Cellulose-growth-specific protein	GO:0030245,GO:0005576,GO:0004553,GO:0030248	0	0
TR24540_c0_g1	0	0	3.865	3.235	0.000396588	0.00825246	Downregulated	GFPT1_MOUSE	Full=Glutamine--fructose-6-phosphate aminotransferase [isomerizing] 1	GO:0004360,GO:0032922,GO:0030246,GO:0070062,GO:0006541,GO:0005975,GO:0006048	Solyc01g087870.2.1	Glucosamine--fructose-6-phosphate aminotransferase IPR005855 Glucosamine-fructose-6-phosphate aminotransferase, isomerising
TR26781_c0_g3	0	0	4.685	5.883	0.00039116	0.00817164	Downregulated	PDI_HUMIN	Full=Protein disulfide-isomerase	GO:0045454,GO:0003756,GO:0005788	Solyc06g060290.2.1	Protein disulfide isomerase IPR005792 Protein disulphide isomerase
TR68239_c0_g1	0	0	3.988	5.006	0.00039088	0.00817116	Downregulated	0	0	0	0	0
TR40394_c0_g1	0	0	3.067	4.7	0.000460986	0.00921797	Downregulated	CPN2_MOUSE	Full=Carboxypeptidase N subunit 2	GO:0070062,GO:0072562	Solyc01g102870.1.1	LRR receptor-like serine_threonine-protein kinase, RLP
TR23993_c0_g1	0	0	3.282	3.431	0.000365452	0.00773637	Downregulated	CHI1_APHAL	Full=Chitinase 1	GO:0000272,GO:0005576,GO:0004568,GO:0006032	Solyc07g005090.2.1	Chitinase A IPR011583 Chitinase II
TR4896_c0_g1	0	0	5.567	4.802	0.000382696	0.00804954	Downregulated	0	0	0	0	0
TR48004_c0_g1	0	0	5.314	5.68	0.000362592	0.00769635	Downregulated	0	0	0	0	0
TR5483_c0_g1	0	0	5.498	4.834	0.00037576	0.00792815	Downregulated	RNHX1_ARATH	Full=Putative ribonuclease H protein At1g65750	GO:0003676,GO:0046872,GO:0004523	Solyc00g304030.1.1	Macrolide export ATP-binding_permease protein MacB IPR003439 ABC transporter-like
TR39545_c0_g1	0	0	6.066	9.769	0.000491535	0.00962876	Downregulated	0	0	0	0	0
TR4355_c0_g1	0	0	1.794	2.413	0.000388629	0.00813712	Downregulated	FAS_HUMAN	Full=3-hydroxyacyl-[acyl-carrier-protein] dehydratase	GO:0042470,GO:0005794,GO:0016295,GO:0008144,GO:0016296,GO:0005829,GO:0001649,GO:0071353,GO:0004319,GO:0004314,GO:0004312,GO:0047451,GO:0006631,GO:0006633,GO:0016020,GO:0006766,GO:0006767,GO:0006112,GO:0030879,GO:0008270,GO:0044255,GO:0042587,GO:0031325,GO:0047117,GO:0035338,GO:0070402,GO:0004317,GO:0006084,GO:0005739,GO:0044822,GO:0005737,GO:0005886,GO:0004313,GO:0004316,GO:0015939,GO:0004315,GO:…	0	0
TR9422_c0_g1	0	0	5.69	5.319	0.000488115	0.00960534	Downregulated	PE1_ANOGA	Full=Peritrophin-1	GO:0006030,GO:0008061,GO:0005576	0	0
TR70303_c0_g1	0	0	3.09	2.891	0.000488302	0.00960534	Downregulated	AMYR_DROOR	Full=Alpha-amylase-related protein	GO:0004556,GO:0005975,GO:0005576,GO:0046872	0	0
TR50948_c0_g1	0	0	4.8	4.497	0.000488548	0.00960534	Downregulated	INDA1_HYPAT	Full=Amino-acid permease inda1	GO:0016021,GO:0015171	Solyc05g008770.2.1	Amino acid permease IPR002293 Amino acid_polyamine transporter I
TR14283_c0_g2	0	0	5.843	5.57	0.000484458	0.00956683	Downregulated	LAX3_ARATH	Full=Auxin transporter-like protein 3	GO:0048829,GO:0016021,GO:0009926,GO:0009733,GO:0015293,GO:0005886,GO:0003333,GO:0010328,GO:0009734,GO:0015171,GO:0060919,GO:0010311	Solyc11g013310.1.1	Auxin transporter-like protein 3 IPR013057 Amino acid transporter, transmembrane
TR20028_c0_g1	0	0	5.951	7.121	0.000492369	0.00963694	Downregulated	0	0	0	0	0
