# Supplementary material for: Combining transcriptome analysis and GWAS for identification and validation of marker genes in the Physalis peruviana-Fusarium oxysporum pathosystem
Source: PeerJ. 2021 Mar 22;9:e11135. doi: 10.7717/peerj.11135 (PMC7993016; doi:10.7717/peerj.11135)
Supplement: Supplemental Information 10 — Yellow color represents the original alignment with the Physalis transcript ID from the DEGs candidate genes (see Supplemental Table S5) [file peerj-09-11135-s010.xlsx]

## Sheet: Table_S6
Supplemental Table S6: BLAST results from the primer pairs designed for the 10 DEGs and the de novo cape gooseberry transcriptome. Yellow color represents the original alignment with the Physalis transcript ID from the DEGs candidate genes (see Supplemental Table S5)
Primer Sequence	Physalis transcript	Percentage of identical matches	alingnment length	Number of mismatches	Number of gap openings	Start of alignment in primer sequence	End of alignment in primer sequence	Start of alignment in Physalis	End of alignment in Physalis	Expected value	Bit socre
Solyc08g066660.1.1_F	TR44042|c0_g1_i1	100000	20	0	0	1	20	361	380	7.85e-04	38.1
Solyc08g066660.1.1_F	TR30746|c0_g1_i2	100000	15	0	0	6	20	808	794	0.47	28.8
Solyc08g066660.1.1_F	TR30746|c0_g1_i1	100000	15	0	0	6	20	808	794	0.47	28.8
Solyc08g066660.1.1_F	TR71940|c0_g1_i2	100000	14	0	0	7	20	287	300	1.7	27.0
Solyc08g066660.1.1_F	TR71940|c0_g1_i1	100000	14	0	0	7	20	287	300	1.7	27.0
Solyc08g066660.1.1_F	TR12165|c0_g1_i1	100000	14	0	0	7	20	545	532	1.7	27.0
Solyc08g066660.1.1_F	TR8757|c0_g1_i2	100000	14	0	0	4	17	697	684	1.7	27.0
Solyc08g066660.1.1_F	TR8757|c0_g1_i1	100000	14	0	0	4	17	709	696	1.7	27.0
Solyc08g066660.1.1_F	TR64424|c0_g1_i1	100000	13	0	0	8	20	1123	1111	6.1	25.1
Solyc08g066660.1.1_F	TR44342|c0_g1_i4	100000	13	0	0	4	16	225	213	6.1	25.1
Solyc08g066660.1.1_F	TR44342|c0_g1_i3	100000	13	0	0	4	16	279	267	6.1	25.1
Solyc08g066660.1.1_F	TR44342|c0_g1_i2	100000	13	0	0	4	16	299	287	6.1	25.1
Solyc08g066660.1.1_F	TR35923|c0_g1_i2	89474	19	2	0	1	19	741	723	6.1	25.1
Solyc08g066660.1.1_F	TR35923|c0_g1_i1	89474	19	2	0	1	19	743	725	6.1	25.1
Solyc08g066660.1.1_F	TR35603|c0_g1_i1	100000	13	0	0	6	18	3171	3159	6.1	25.1
Solyc08g066660.1.1_F	TR34903|c0_g1_i4	100000	13	0	0	6	18	54	42	6.1	25.1
Solyc08g066660.1.1_F	TR34903|c0_g1_i3	100000	13	0	0	6	18	54	42	6.1	25.1
Solyc08g066660.1.1_F	TR34903|c0_g1_i2	100000	13	0	0	6	18	54	42	6.1	25.1
Solyc08g066660.1.1_F	TR34903|c0_g1_i1	100000	13	0	0	6	18	54	42	6.1	25.1
Solyc08g066660.1.1_F	TR31238|c2_g1_i2	93750	16	1	0	5	20	165	180	6.1	25.1
Solyc08g066660.1.1_F	TR31238|c2_g1_i1	93750	16	1	0	5	20	174	189	6.1	25.1
Solyc08g066660.1.1_F	TR19417|c0_g1_i2	100000	13	0	0	5	17	754	766	6.1	25.1
Solyc08g066660.1.1_F	TR19417|c0_g1_i1	100000	13	0	0	5	17	805	817	6.1	25.1
Solyc08g066660.1.1_F	TR10208|c0_g1_i1	93750	16	1	0	2	17	701	716	6.1	25.1
Solyc08g066660.1.1_F	TR8725|c0_g2_i2	93750	16	1	0	1	16	790	805	6.1	25.1
Solyc08g066660.1.1_F	TR8725|c0_g2_i1	93750	16	1	0	1	16	784	799	6.1	25.1
Solyc08g066660.1.1_F	TR7842|c0_g1_i1	100000	13	0	0	4	16	95	107	6.1	25.1
Solyc08g066660.1.1_R	TR44042|c0_g1_i1	95000	20	1	0	1	20	517	498	0.037	32.5
Solyc08g066660.1.1_R	TR54916|c0_g1_i6	93750	16	1	0	1	16	1907	1922	6.1	25.1
Solyc08g066660.1.1_R	TR54916|c0_g1_i5	93750	16	1	0	1	16	1892	1907	6.1	25.1
Solyc08g066660.1.1_R	TR54916|c0_g1_i4	93750	16	1	0	1	16	1888	1903	6.1	25.1
Solyc08g066660.1.1_R	TR54916|c0_g1_i3	93750	16	1	0	1	16	1463	1478	6.1	25.1
Solyc08g066660.1.1_R	TR54916|c0_g1_i2	93750	16	1	0	1	16	1873	1888	6.1	25.1
Solyc08g066660.1.1_R	TR54916|c0_g1_i1	93750	16	1	0	1	16	1482	1497	6.1	25.1
Solyc11g066270.1.1_F	TR21291|c0_g1_i1	100000	20	0	0	1	20	842	861	7.85e-04	38.1
Solyc11g066270.1.1_F	TR25774|c0_g1_i1	100000	15	0	0	2	16	597	611	0.47	28.8
Solyc11g066270.1.1_F	TR21326|c0_g1_i2	94118	17	1	0	2	18	507	491	1.7	27.0
Solyc11g066270.1.1_F	TR21326|c0_g1_i1	94118	17	1	0	2	18	507	491	1.7	27.0
Solyc11g066270.1.1_F	TR8756|c3_g1_i1	94118	17	1	0	2	18	195	211	1.7	27.0
Solyc11g066270.1.1_F	TR2238|c0_g1_i4	94444	18	0	1	2	18	118	135	1.7	27.0
Solyc11g066270.1.1_F	TR45898|c0_g2_i5	93750	16	1	0	5	20	400	385	6.1	25.1
Solyc11g066270.1.1_F	TR45898|c0_g2_i4	93750	16	1	0	5	20	2041	2026	6.1	25.1
Solyc11g066270.1.1_F	TR45898|c0_g2_i3	93750	16	1	0	5	20	1895	1880	6.1	25.1
Solyc11g066270.1.1_F	TR45898|c0_g2_i2	93750	16	1	0	5	20	597	582	6.1	25.1
Solyc11g066270.1.1_F	TR45898|c0_g2_i1	93750	16	1	0	5	20	1132	1117	6.1	25.1
Solyc11g066270.1.1_F	TR45670|c0_g1_i1	100000	13	0	0	5	17	353	341	6.1	25.1
Solyc11g066270.1.1_F	TR38937|c0_g1_i1	100000	13	0	0	2	14	1255	1267	6.1	25.1
Solyc11g066270.1.1_F	TR29168|c0_g1_i1	93750	16	1	0	1	16	2395	2410	6.1	25.1
Solyc11g066270.1.1_F	TR23804|c0_g1_i2	100000	13	0	0	5	17	1333	1321	6.1	25.1
Solyc11g066270.1.1_F	TR18337|c0_g1_i4	100000	13	0	0	2	14	438	426	6.1	25.1
Solyc11g066270.1.1_F	TR18337|c0_g1_i3	100000	13	0	0	2	14	456	444	6.1	25.1
Solyc11g066270.1.1_F	TR18337|c0_g1_i2	100000	13	0	0	2	14	456	444	6.1	25.1
Solyc11g066270.1.1_F	TR18337|c0_g1_i1	100000	13	0	0	2	14	438	426	6.1	25.1
Solyc11g066270.1.1_F	TR9713|c0_g1_i2	93750	16	1	0	2	17	1558	1543	6.1	25.1
Solyc11g066270.1.1_F	TR9713|c0_g1_i1	93750	16	1	0	2	17	1558	1543	6.1	25.1
Solyc11g066270.1.1_F	TR7972|c0_g1_i3	100000	13	0	0	5	17	2974	2986	6.1	25.1
Solyc11g066270.1.1_F	TR7864|c0_g2_i2	100000	13	0	0	3	15	285	273	6.1	25.1
Solyc11g066270.1.1_R	TR21291|c0_g1_i1	94444	18	1	0	1	18	917	900	0.47	28.8
Solyc11g066270.1.1_R	TR8746|c0_g1_i4	94444	18	0	1	3	20	1836	1852	1.7	27.0
Solyc11g066270.1.1_R	TR8746|c0_g1_i3	94444	18	0	1	3	20	1862	1878	1.7	27.0
Solyc11g066270.1.1_R	TR8746|c0_g1_i2	94444	18	0	1	3	20	1859	1875	1.7	27.0
Solyc11g066270.1.1_R	TR8746|c0_g1_i1	94444	18	0	1	3	20	1839	1855	1.7	27.0
Solyc11g066270.1.1_R	TR62617|c0_g1_i1	100000	13	0	0	7	19	816	828	6.1	25.1
Solyc11g066270.1.1_R	TR61262|c0_g1_i1	93750	16	1	0	1	16	592	577	6.1	25.1
Solyc11g066270.1.1_R	TR49878|c0_g1_i1	100000	13	0	0	6	18	28	16	6.1	25.1
Solyc11g066270.1.1_R	TR31405|c0_g1_i1	100000	13	0	0	7	19	679	691	6.1	25.1
Solyc11g066270.1.1_R	TR13913|c0_g2_i2	100000	13	0	0	3	15	35	47	6.1	25.1
Solyc11g066270.1.1_R	TR13913|c0_g2_i1	100000	13	0	0	3	15	35	47	6.1	25.1
Solyc11g066270.1.1_R	TR8797|c1_g1_i3	100000	13	0	0	6	18	1147	1159	6.1	25.1
Solyc11g066270.1.1_R	TR8797|c1_g1_i2	100000	13	0	0	6	18	934	946	6.1	25.1
Solyc11g066270.1.1_R	TR8797|c1_g1_i1	100000	13	0	0	6	18	1147	1159	6.1	25.1
Solyc06g068830.1.1_F	TR45595|c0_g1_i2	94444	18	1	0	1	18	263	246	0.47	28.8
Solyc06g068830.1.1_F	TR25161|c0_g2_i2	94444	18	1	0	3	20	987	970	0.47	28.8
Solyc06g068830.1.1_F	TR25161|c0_g2_i1	94444	18	1	0	3	20	1018	1001	0.47	28.8
Solyc06g068830.1.1_F	TR69285|c1_g1_i2	100000	14	0	0	4	17	176	163	1.7	27.0
Solyc06g068830.1.1_F	TR69285|c1_g1_i1	100000	14	0	0	4	17	176	163	1.7	27.0
Solyc06g068830.1.1_F	TR50595|c1_g2_i2	100000	14	0	0	8	21	2796	2783	1.7	27.0
Solyc06g068830.1.1_F	TR36743|c0_g2_i2	100000	14	0	0	8	21	842	855	1.7	27.0
Solyc06g068830.1.1_F	TR36743|c0_g2_i1	100000	14	0	0	8	21	838	851	1.7	27.0
Solyc06g068830.1.1_F	TR24364|c0_g1_i2	100000	14	0	0	8	21	2567	2554	1.7	27.0
Solyc06g068830.1.1_F	TR8281|c0_g1_i3	100000	14	0	0	8	21	3004	3017	1.7	27.0
Solyc06g068830.1.1_F	TR8281|c0_g1_i1	100000	14	0	0	8	21	3004	3017	1.7	27.0
Solyc06g068830.1.1_F	TR68830|c1_g2_i2	93750	16	1	0	7	22	378	363	6.1	25.1
Solyc06g068830.1.1_F	TR68830|c1_g2_i1	93750	16	1	0	7	22	378	363	6.1	25.1
Solyc06g068830.1.1_F	TR66266|c0_g1_i1	89474	19	2	0	2	20	262	244	6.1	25.1
Solyc06g068830.1.1_F	TR56131|c0_g1_i3	93750	16	1	0	2	17	569	554	6.1	25.1
Solyc06g068830.1.1_F	TR56131|c0_g1_i1	93750	16	1	0	2	17	569	554	6.1	25.1
Solyc06g068830.1.1_F	TR45857|c0_g1_i13	100000	13	0	0	8	20	85	97	6.1	25.1
Solyc06g068830.1.1_F	TR45857|c0_g1_i8	100000	13	0	0	8	20	85	97	6.1	25.1
Solyc06g068830.1.1_F	TR45857|c0_g1_i7	100000	13	0	0	8	20	89	101	6.1	25.1
Solyc06g068830.1.1_F	TR45857|c0_g1_i4	100000	13	0	0	8	20	89	101	6.1	25.1
Solyc06g068830.1.1_F	TR45857|c0_g1_i3	100000	13	0	0	8	20	85	97	6.1	25.1
Solyc06g068830.1.1_F	TR45857|c0_g1_i2	100000	13	0	0	8	20	89	101	6.1	25.1
Solyc06g068830.1.1_F	TR45857|c0_g1_i1	100000	13	0	0	8	20	89	101	6.1	25.1
Solyc06g068830.1.1_F	TR45595|c0_g1_i1	93750	16	1	0	3	18	264	249	6.1	25.1
Solyc06g068830.1.1_F	TR43359|c2_g1_i7	100000	13	0	0	7	19	1254	1266	6.1	25.1
Solyc06g068830.1.1_F	TR43359|c2_g1_i5	100000	13	0	0	7	19	1254	1266	6.1	25.1
Solyc06g068830.1.1_F	TR43359|c2_g1_i4	100000	13	0	0	7	19	1251	1263	6.1	25.1
Solyc06g068830.1.1_F	TR43359|c2_g1_i2	100000	13	0	0	7	19	1260	1272	6.1	25.1
Solyc06g068830.1.1_F	TR43359|c2_g1_i1	100000	13	0	0	7	19	1257	1269	6.1	25.1
Solyc06g068830.1.1_F	TR43346|c0_g1_i3	100000	13	0	0	9	21	1451	1463	6.1	25.1
Solyc06g068830.1.1_F	TR36495|c4_g1_i2	100000	13	0	0	2	14	1780	1792	6.1	25.1
Solyc06g068830.1.1_F	TR36495|c4_g1_i1	100000	13	0	0	2	14	2219	2231	6.1	25.1
Solyc06g068830.1.1_F	TR36434|c2_g1_i11	100000	13	0	0	1	13	1034	1046	6.1	25.1
Solyc06g068830.1.1_F	TR29355|c0_g1_i1	93750	16	1	0	6	21	420	435	6.1	25.1
Solyc06g068830.1.1_F	TR29103|c0_g1_i1	100000	13	0	0	4	16	352	340	6.1	25.1
Solyc06g068830.1.1_F	TR27258|c0_g1_i1	100000	13	0	0	6	18	512	500	6.1	25.1
Solyc06g068830.1.1_F	TR21453|c1_g1_i1	93750	16	1	0	2	17	1238	1253	6.1	25.1
Solyc06g068830.1.1_F	TR21337|c0_g1_i1	100000	13	0	0	2	14	483	471	6.1	25.1
Solyc06g068830.1.1_F	TR10893|c0_g1_i1	94118	17	0	1	6	21	775	759	6.1	25.1
Solyc06g068830.1.1_F	TR8302|c1_g1_i3	100000	13	0	0	3	15	598	586	6.1	25.1
Solyc06g068830.1.1_F	TR8302|c1_g1_i2	100000	13	0	0	3	15	597	585	6.1	25.1
Solyc06g068830.1.1_F	TR8302|c1_g1_i1	100000	13	0	0	3	15	597	585	6.1	25.1
Solyc06g068830.1.1_F	TR1911|c0_g1_i4	93750	16	1	0	7	22	38	53	6.1	25.1
Solyc06g068830.1.1_F	TR1911|c0_g1_i3	93750	16	1	0	7	22	38	53	6.1	25.1
Solyc06g068830.1.1_F	TR1911|c0_g1_i2	93750	16	1	0	7	22	38	53	6.1	25.1
Solyc06g068830.1.1_F	TR1911|c0_g1_i1	93750	16	1	0	7	22	38	53	6.1	25.1
Solyc06g068830.1.1_R	TR68101|c0_g1_i2	95238	21	1	0	1	21	255	235	0.010	34.4
Solyc06g068830.1.1_R	TR68101|c0_g1_i1	95238	21	1	0	1	21	255	235	0.010	34.4
Solyc06g068830.1.1_R	TR68824|c0_g2_i1	94118	17	1	0	3	19	1220	1236	1.7	27.0
Solyc06g068830.1.1_R	TR68824|c0_g1_i4	94118	17	1	0	3	19	2159	2175	1.7	27.0
Solyc06g068830.1.1_R	TR68824|c0_g1_i3	94118	17	1	0	3	19	2124	2140	1.7	27.0
Solyc06g068830.1.1_R	TR68824|c0_g1_i2	94118	17	1	0	3	19	2160	2176	1.7	27.0
Solyc06g068830.1.1_R	TR68824|c0_g1_i1	94118	17	1	0	3	19	2125	2141	1.7	27.0
Solyc06g068830.1.1_R	TR36817|c1_g2_i2	94118	17	1	0	1	17	353	337	1.7	27.0
Solyc06g068830.1.1_R	TR36817|c1_g3_i1	94118	17	1	0	1	17	1005	989	1.7	27.0
Solyc06g068830.1.1_R	TR36817|c1_g3_i1	93750	16	1	0	1	16	1470	1455	6.1	25.1
Solyc06g068830.1.1_R	TR35907|c0_g1_i7	100000	14	0	0	1	14	1006	1019	1.7	27.0
Solyc06g068830.1.1_R	TR35907|c0_g1_i6	100000	14	0	0	1	14	1443	1456	1.7	27.0
Solyc06g068830.1.1_R	TR35907|c0_g1_i4	100000	14	0	0	1	14	1494	1507	1.7	27.0
Solyc06g068830.1.1_R	TR34179|c0_g1_i5	90000	20	2	0	1	20	284	265	1.7	27.0
Solyc06g068830.1.1_R	TR7944|c1_g2_i3	100000	14	0	0	5	18	408	421	1.7	27.0
Solyc06g068830.1.1_R	TR7944|c1_g2_i1	100000	14	0	0	5	18	408	421	1.7	27.0
Solyc06g068830.1.1_R	TR57351|c0_g2_i1	93750	16	1	0	1	16	664	679	6.1	25.1
Solyc06g068830.1.1_R	TR57351|c0_g1_i1	93750	16	1	0	1	16	664	679	6.1	25.1
Solyc06g068830.1.1_R	TR53177|c0_g2_i2	100000	13	0	0	2	14	473	461	6.1	25.1
Solyc06g068830.1.1_R	TR53177|c0_g2_i1	100000	13	0	0	2	14	473	461	6.1	25.1
Solyc06g068830.1.1_R	TR49600|c0_g1_i1	93750	16	1	0	1	16	987	972	6.1	25.1
Solyc06g068830.1.1_R	TR47179|c0_g2_i1	93750	16	1	0	1	16	1050	1035	6.1	25.1
Solyc06g068830.1.1_R	TR47179|c0_g1_i1	93750	16	1	0	1	16	1032	1017	6.1	25.1
Solyc06g068830.1.1_R	TR46431|c0_g1_i6	100000	13	0	0	4	16	831	819	6.1	25.1
Solyc06g068830.1.1_R	TR46431|c0_g1_i2	100000	13	0	0	4	16	481	469	6.1	25.1
Solyc06g068830.1.1_R	TR46431|c0_g1_i1	93750	16	1	0	4	19	927	912	6.1	25.1
Solyc06g068830.1.1_R	TR41380|c0_g1_i3	100000	13	0	0	7	19	1512	1500	6.1	25.1
Solyc06g068830.1.1_R	TR41380|c0_g1_i1	100000	13	0	0	7	19	1516	1504	6.1	25.1
Solyc06g068830.1.1_R	TR30652|c0_g1_i4	86364	22	3	0	1	22	422	443	6.1	25.1
Solyc06g068830.1.1_R	TR30652|c0_g1_i3	86364	22	3	0	1	22	453	474	6.1	25.1
Solyc06g068830.1.1_R	TR30652|c0_g1_i2	86364	22	3	0	1	22	422	443	6.1	25.1
Solyc06g068830.1.1_R	TR30652|c0_g1_i1	86364	22	3	0	1	22	453	474	6.1	25.1
Solyc06g068830.1.1_R	TR2463|c0_g1_i2	93750	16	1	0	1	16	255	270	6.1	25.1
Solyc06g068830.1.1_R	TR2463|c0_g1_i1	93750	16	1	0	1	16	255	270	6.1	25.1
Solyc06g068830.1.1_R	TR567|c0_g1_i1	100000	13	0	0	9	21	571	559	6.1	25.1
Solyc03g062890.2.1_F	TR68105|c0_g1_i4	100000	14	0	0	2	15	613	626	1.7	27.0
Solyc03g062890.2.1_F	TR68105|c0_g1_i1	100000	14	0	0	2	15	680	693	1.7	27.0
Solyc03g062890.2.1_F	TR60335|c0_g1_i1	93750	16	1	0	7	22	357	342	6.1	25.1
Solyc03g062890.2.1_F	TR51121|c0_g1_i1	89474	19	2	0	4	22	3279	3297	6.1	25.1
Solyc03g062890.2.1_F	TR37265|c0_g1_i4	93750	16	1	0	1	16	231	216	6.1	25.1
Solyc03g062890.2.1_F	TR37265|c0_g1_i1	93750	16	1	0	1	16	231	216	6.1	25.1
Solyc03g062890.2.1_F	TR10205|c0_g1_i2	100000	13	0	0	9	21	549	537	6.1	25.1
Solyc03g062890.2.1_F	TR10205|c0_g1_i1	100000	13	0	0	9	21	639	627	6.1	25.1
Solyc03g062890.2.1_R	TR54755|c0_g2_i1	100000	17	0	0	4	20	195	179	0.036	32.5
Solyc03g062890.2.1_R	TR52663|c0_g2_i2	94444	18	1	0	4	21	1324	1307	0.47	28.8
Solyc03g062890.2.1_R	TR52663|c0_g2_i1	94444	18	1	0	4	21	1324	1307	0.47	28.8
Solyc03g062890.2.1_R	TR48777|c0_g1_i1	94118	17	1	0	4	20	260	244	1.7	27.0
Solyc03g062890.2.1_R	TR65764|c0_g1_i1	93750	16	1	0	2	17	325	340	6.1	25.1
Solyc03g062890.2.1_R	TR54354|c0_g1_i1	100000	13	0	0	3	15	454	442	6.1	25.1
Solyc03g062890.2.1_R	TR44988|c0_g1_i1	93750	16	1	0	5	20	377	392	6.1	25.1
Solyc01g103850.2.1_F	TR58711|c0_g1_i1	94737	19	1	0	1	19	677	659	0.13	30.7
Solyc01g103850.2.1_F	TR20478|c0_g1_i1	100000	14	0	0	3	16	181	194	1.7	27.0
Solyc01g103850.2.1_F	TR69232|c2_g2_i7	100000	13	0	0	4	16	610	598	6.1	25.1
Solyc01g103850.2.1_F	TR69232|c2_g2_i6	100000	13	0	0	4	16	783	771	6.1	25.1
Solyc01g103850.2.1_F	TR69232|c2_g2_i1	100000	13	0	0	4	16	758	746	6.1	25.1
Solyc01g103850.2.1_F	TR66914|c0_g1_i2	93750	16	1	0	4	19	482	467	6.1	25.1
Solyc01g103850.2.1_F	TR65089|c2_g1_i7	100000	13	0	0	4	16	1307	1295	6.1	25.1
Solyc01g103850.2.1_F	TR65089|c2_g1_i5	100000	13	0	0	4	16	1307	1295	6.1	25.1
Solyc01g103850.2.1_F	TR65089|c2_g1_i4	100000	13	0	0	4	16	1358	1346	6.1	25.1
Solyc01g103850.2.1_F	TR65089|c2_g1_i3	100000	13	0	0	4	16	1358	1346	6.1	25.1
Solyc01g103850.2.1_F	TR65089|c2_g1_i2	100000	13	0	0	4	16	1358	1346	6.1	25.1
Solyc01g103850.2.1_F	TR65089|c2_g1_i1	100000	13	0	0	4	16	1358	1346	6.1	25.1
Solyc01g103850.2.1_F	TR51873|c0_g1_i1	100000	13	0	0	4	16	1324	1312	6.1	25.1
Solyc01g103850.2.1_F	TR44350|c0_g1_i3	89474	19	2	0	1	19	2767	2785	6.1	25.1
Solyc01g103850.2.1_F	TR44350|c0_g1_i2	89474	19	2	0	1	19	2767	2785	6.1	25.1
Solyc01g103850.2.1_F	TR26194|c0_g1_i1	100000	13	0	0	2	14	524	512	6.1	25.1
Solyc01g103850.2.1_F	TR23799|c1_g1_i4	100000	13	0	0	4	16	2019	2007	6.1	25.1
Solyc01g103850.2.1_F	TR23799|c1_g1_i3	100000	13	0	0	4	16	2020	2008	6.1	25.1
Solyc01g103850.2.1_F	TR23799|c1_g1_i1	100000	13	0	0	4	16	2021	2009	6.1	25.1
Solyc01g103850.2.1_F	TR21926|c0_g1_i1	94118	17	0	1	2	17	802	818	6.1	25.1
Solyc01g103850.2.1_R	TR15576|c0_g1_i1	100000	14	0	0	3	16	1104	1117	1.7	27.0
Solyc01g103850.2.1_R	TR70078|c0_g1_i4	100000	13	0	0	2	14	69	57	6.1	25.1
Solyc01g103850.2.1_R	TR47794|c0_g1_i1	100000	13	0	0	2	14	473	485	6.1	25.1
Solyc01g103850.2.1_R	TR43146|c0_g1_i6	100000	13	0	0	6	18	2069	2081	6.1	25.1
Solyc01g103850.2.1_R	TR43146|c0_g1_i4	100000	13	0	0	6	18	2069	2081	6.1	25.1
Solyc01g103850.2.1_R	TR43146|c0_g1_i3	100000	13	0	0	6	18	1620	1632	6.1	25.1
Solyc01g103850.2.1_R	TR43146|c0_g1_i1	100000	13	0	0	6	18	1620	1632	6.1	25.1
Solyc01g103850.2.1_R	TR17684|c0_g1_i1	89474	19	2	0	1	19	920	902	6.1	25.1
Solyc06g072650.1.1_F	TR12950|c0_g1_i3	100000	17	0	0	4	20	514	498	0.037	32.5
Solyc06g072650.1.1_F	TR12950|c0_g1_i2	100000	17	0	0	4	20	465	449	0.037	32.5
Solyc06g072650.1.1_F	TR12950|c0_g1_i1	100000	17	0	0	4	20	440	424	0.037	32.5
Solyc06g072650.1.1_F	TR66847|c0_g1_i2	94118	17	1	0	2	18	791	775	1.7	27.0
Solyc06g072650.1.1_F	TR64234|c0_g1_i1	100000	14	0	0	3	16	488	475	1.7	27.0
Solyc06g072650.1.1_F	TR51527|c0_g2_i2	100000	14	0	0	3	16	52	65	1.7	27.0
Solyc06g072650.1.1_F	TR51527|c0_g2_i1	100000	14	0	0	3	16	52	65	1.7	27.0
Solyc06g072650.1.1_F	TR43849|c1_g1_i2	100000	14	0	0	3	16	1823	1810	1.7	27.0
Solyc06g072650.1.1_F	TR43849|c1_g1_i1	100000	14	0	0	3	16	1823	1810	1.7	27.0
Solyc06g072650.1.1_F	TR71761|c0_g1_i4	100000	13	0	0	1	13	537	525	6.1	25.1
Solyc06g072650.1.1_F	TR71761|c0_g1_i3	100000	13	0	0	1	13	439	427	6.1	25.1
Solyc06g072650.1.1_F	TR71761|c0_g1_i2	100000	13	0	0	1	13	439	427	6.1	25.1
Solyc06g072650.1.1_F	TR71761|c0_g1_i1	100000	13	0	0	1	13	537	525	6.1	25.1
Solyc06g072650.1.1_F	TR71609|c0_g1_i1	100000	13	0	0	1	13	1089	1101	6.1	25.1
Solyc06g072650.1.1_F	TR69896|c0_g1_i1	93750	16	1	0	2	17	1013	998	6.1	25.1
Solyc06g072650.1.1_F	TR64480|c1_g1_i2	100000	13	0	0	2	14	738	726	6.1	25.1
Solyc06g072650.1.1_F	TR61056|c0_g1_i1	93750	16	1	0	3	18	110	125	6.1	25.1
Solyc06g072650.1.1_F	TR57815|c0_g1_i1	93750	16	1	0	2	17	393	378	6.1	25.1
Solyc06g072650.1.1_F	TR51573|c0_g1_i1	100000	13	0	0	8	20	1643	1631	6.1	25.1
Solyc06g072650.1.1_F	TR49048|c1_g2_i1	93750	16	1	0	5	20	375	390	6.1	25.1
Solyc06g072650.1.1_F	TR47621|c0_g2_i1	89474	19	2	0	1	19	638	656	6.1	25.1
Solyc06g072650.1.1_F	TR42541|c2_g1_i1	94118	17	0	1	3	19	565	550	6.1	25.1
Solyc06g072650.1.1_F	TR35851|c0_g1_i7	100000	13	0	0	1	13	641	629	6.1	25.1
Solyc06g072650.1.1_F	TR35851|c0_g1_i6	100000	13	0	0	1	13	629	617	6.1	25.1
Solyc06g072650.1.1_F	TR35851|c0_g1_i5	100000	13	0	0	1	13	437	425	6.1	25.1
Solyc06g072650.1.1_F	TR35621|c0_g1_i6	100000	13	0	0	7	19	1569	1557	6.1	25.1
Solyc06g072650.1.1_F	TR35621|c0_g1_i5	100000	13	0	0	7	19	1560	1548	6.1	25.1
Solyc06g072650.1.1_F	TR35621|c0_g1_i4	100000	13	0	0	7	19	1560	1548	6.1	25.1
Solyc06g072650.1.1_F	TR35621|c0_g1_i2	100000	13	0	0	7	19	1569	1557	6.1	25.1
Solyc06g072650.1.1_F	TR34138|c0_g1_i2	100000	13	0	0	2	14	65	77	6.1	25.1
Solyc06g072650.1.1_F	TR34138|c0_g1_i1	100000	13	0	0	2	14	65	77	6.1	25.1
Solyc06g072650.1.1_F	TR32354|c0_g1_i2	100000	13	0	0	6	18	95	107	6.1	25.1
Solyc06g072650.1.1_F	TR31108|c1_g4_i7	100000	13	0	0	5	17	1464	1476	6.1	25.1
Solyc06g072650.1.1_F	TR22054|c3_g3_i1	100000	13	0	0	3	15	674	662	6.1	25.1
Solyc06g072650.1.1_F	TR17535|c0_g1_i1	100000	13	0	0	7	19	283	295	6.1	25.1
Solyc06g072650.1.1_F	TR13439|c0_g1_i2	100000	13	0	0	3	15	99	111	6.1	25.1
Solyc06g072650.1.1_F	TR13439|c0_g1_i1	100000	13	0	0	3	15	99	111	6.1	25.1
Solyc06g072650.1.1_F	TR8794|c0_g1_i5	93750	16	1	0	1	16	540	555	6.1	25.1
Solyc06g072650.1.1_F	TR8794|c0_g1_i4	93750	16	1	0	1	16	535	550	6.1	25.1
Solyc06g072650.1.1_F	TR8794|c0_g1_i3	93750	16	1	0	1	16	539	554	6.1	25.1
Solyc06g072650.1.1_F	TR8794|c0_g1_i2	93750	16	1	0	1	16	541	556	6.1	25.1
Solyc06g072650.1.1_F	TR7901|c0_g1_i1	93750	16	1	0	5	20	844	829	6.1	25.1
Solyc06g072650.1.1_F	TR2257|c0_g1_i1	100000	13	0	0	2	14	1702	1714	6.1	25.1
Solyc06g072650.1.1_F	TR2243|c0_g1_i1	100000	13	0	0	3	15	1235	1247	6.1	25.1
Solyc06g072650.1.1_R	TR50402|c0_g1_i1	94444	18	0	1	3	19	14	31	1.7	27.0
Solyc06g072650.1.1_R	TR31652|c0_g1_i1	100000	14	0	0	6	19	453	440	1.7	27.0
Solyc06g072650.1.1_R	TR70571|c0_g2_i3	93750	16	1	0	5	20	241	256	6.1	25.1
Solyc06g072650.1.1_R	TR70571|c0_g2_i2	93750	16	1	0	5	20	241	256	6.1	25.1
Solyc06g072650.1.1_R	TR70571|c0_g2_i1	93750	16	1	0	5	20	241	256	6.1	25.1
Solyc06g072650.1.1_R	TR66435|c0_g1_i1	93750	16	1	0	3	18	1846	1861	6.1	25.1
Solyc06g072650.1.1_R	TR65141|c0_g1_i1	100000	13	0	0	4	16	2531	2519	6.1	25.1
Solyc06g072650.1.1_R	TR48389|c0_g1_i5	100000	13	0	0	8	20	616	604	6.1	25.1
Solyc06g072650.1.1_R	TR48389|c0_g1_i4	100000	13	0	0	8	20	628	616	6.1	25.1
Solyc06g072650.1.1_R	TR48389|c0_g1_i3	100000	13	0	0	8	20	616	604	6.1	25.1
Solyc06g072650.1.1_R	TR48389|c0_g1_i2	100000	13	0	0	8	20	628	616	6.1	25.1
Solyc06g072650.1.1_R	TR48389|c0_g1_i1	100000	13	0	0	8	20	628	616	6.1	25.1
Solyc06g072650.1.1_R	TR43867|c0_g2_i1	100000	13	0	0	3	15	661	673	6.1	25.1
Solyc06g072650.1.1_R	TR42940|c0_g1_i1	89474	19	2	0	1	19	36	18	6.1	25.1
Solyc06g072650.1.1_R	TR36861|c0_g1_i2	100000	13	0	0	6	18	1079	1091	6.1	25.1
Solyc06g072650.1.1_R	TR36861|c0_g1_i1	100000	13	0	0	6	18	1110	1122	6.1	25.1
Solyc06g072650.1.1_R	TR32502|c0_g1_i2	100000	13	0	0	6	18	947	959	6.1	25.1
Solyc06g072650.1.1_R	TR32502|c0_g1_i1	100000	13	0	0	6	18	946	958	6.1	25.1
Solyc06g072650.1.1_R	TR7993|c0_g1_i11	100000	13	0	0	1	13	451	439	6.1	25.1
Solyc06g072650.1.1_R	TR7993|c0_g1_i10	100000	13	0	0	1	13	451	439	6.1	25.1
Solyc06g072650.1.1_R	TR7993|c0_g1_i9	100000	13	0	0	1	13	451	439	6.1	25.1
Solyc06g072650.1.1_R	TR7993|c0_g1_i8	100000	13	0	0	1	13	451	439	6.1	25.1
Solyc06g072650.1.1_R	TR7993|c0_g1_i7	100000	13	0	0	1	13	451	439	6.1	25.1
Solyc06g072650.1.1_R	TR7993|c0_g1_i6	100000	13	0	0	1	13	334	322	6.1	25.1
Solyc06g072650.1.1_R	TR7993|c0_g1_i5	100000	13	0	0	1	13	334	322	6.1	25.1
Solyc06g072650.1.1_R	TR7993|c0_g1_i3	100000	13	0	0	1	13	451	439	6.1	25.1
Solyc06g072650.1.1_R	TR7993|c0_g1_i2	100000	13	0	0	1	13	334	322	6.1	25.1
Solyc06g072650.1.1_R	TR7351|c1_g1_i3	100000	13	0	0	2	14	352	340	6.1	25.1
Solyc06g072650.1.1_R	TR7351|c1_g1_i2	100000	13	0	0	2	14	564	552	6.1	25.1
Solyc02g093150.2.1_F	TR43380|c0_g1_i2	100000	16	0	0	1	16	61	76	0.13	30.7
Solyc02g093150.2.1_F	TR70414|c0_g1_i1	100000	15	0	0	2	16	24	10	0.47	28.8
Solyc02g093150.2.1_F	TR70104|c0_g2_i7	100000	14	0	0	7	20	441	428	1.7	27.0
Solyc02g093150.2.1_F	TR70104|c0_g2_i3	100000	14	0	0	7	20	441	428	1.7	27.0
Solyc02g093150.2.1_F	TR70104|c0_g2_i2	100000	14	0	0	7	20	395	382	1.7	27.0
Solyc02g093150.2.1_F	TR70104|c0_g2_i1	100000	14	0	0	7	20	395	382	1.7	27.0
Solyc02g093150.2.1_F	TR69913|c0_g1_i1	94118	17	1	0	5	21	263	279	1.7	27.0
Solyc02g093150.2.1_F	TR30548|c0_g1_i1	100000	14	0	0	5	18	357	344	1.7	27.0
Solyc02g093150.2.1_F	TR25072|c0_g1_i2	100000	14	0	0	7	20	1305	1318	1.7	27.0
Solyc02g093150.2.1_F	TR25072|c0_g1_i1	100000	14	0	0	7	20	1305	1318	1.7	27.0
Solyc02g093150.2.1_F	TR4528|c0_g1_i2	100000	14	0	0	1	14	952	939	1.7	27.0
Solyc02g093150.2.1_F	TR4528|c0_g1_i1	100000	14	0	0	1	14	1011	998	1.7	27.0
Solyc02g093150.2.1_F	TR52726|c0_g1_i1	100000	13	0	0	1	13	614	602	6.1	25.1
Solyc02g093150.2.1_F	TR44352|c0_g2_i4	100000	13	0	0	2	14	2378	2390	6.1	25.1
Solyc02g093150.2.1_F	TR41311|c0_g1_i2	100000	13	0	0	7	19	773	761	6.1	25.1
Solyc02g093150.2.1_F	TR41311|c0_g1_i1	100000	13	0	0	7	19	761	749	6.1	25.1
Solyc02g093150.2.1_F	TR35574|c0_g2_i1	100000	13	0	0	9	21	1373	1361	6.1	25.1
Solyc02g093150.2.1_F	TR25049|c0_g1_i2	93750	16	1	0	6	21	378	393	6.1	25.1
Solyc02g093150.2.1_F	TR25049|c0_g1_i1	93750	16	1	0	6	21	378	393	6.1	25.1
Solyc02g093150.2.1_F	TR21401|c0_g1_i3	100000	13	0	0	2	14	307	295	6.1	25.1
Solyc02g093150.2.1_F	TR21401|c0_g1_i2	100000	13	0	0	2	14	322	310	6.1	25.1
Solyc02g093150.2.1_F	TR21401|c0_g1_i1	100000	13	0	0	2	14	322	310	6.1	25.1
Solyc02g093150.2.1_F	TR14101|c0_g1_i1	100000	13	0	0	7	19	1039	1051	6.1	25.1
Solyc02g093150.2.1_F	TR9019|c0_g1_i5	93750	16	1	0	4	19	479	494	6.1	25.1
Solyc02g093150.2.1_F	TR9019|c0_g1_i4	93750	16	1	0	4	19	488	503	6.1	25.1
Solyc02g093150.2.1_F	TR9019|c0_g1_i2	93750	16	1	0	4	19	488	503	6.1	25.1
Solyc02g093150.2.1_F	TR9019|c0_g1_i1	93750	16	1	0	4	19	479	494	6.1	25.1
Solyc02g093150.2.1_F	TR4470|c2_g2_i3	100000	13	0	0	2	14	115	103	6.1	25.1
Solyc02g065090.2.1_F	TR58435|c0_g1_i1	100000	19	0	0	1	19	785	803	0.003	36.2
Solyc02g065090.2.1_F	TR49889|c0_g1_i1	100000	19	0	0	1	19	859	841	0.003	36.2
Solyc02g065090.2.1_F	TR32566|c0_g1_i1	100000	19	0	0	1	19	739	721	0.003	36.2
Solyc02g065090.2.1_F	TR32566|c0_g1_i2	100000	18	0	0	1	18	864	847	0.010	34.4
Solyc02g065090.2.1_F	TR55142|c0_g1_i1	100000	16	0	0	3	18	255	240	0.13	30.7
Solyc02g065090.2.1_F	TR61368|c0_g1_i5	100000	15	0	0	4	18	1864	1850	0.47	28.8
Solyc02g065090.2.1_F	TR61368|c0_g1_i3	100000	15	0	0	4	18	1864	1850	0.47	28.8
Solyc02g065090.2.1_F	TR61368|c0_g1_i2	100000	15	0	0	4	18	1864	1850	0.47	28.8
Solyc02g065090.2.1_F	TR61368|c0_g1_i1	100000	15	0	0	4	18	1870	1856	0.47	28.8
Solyc02g065090.2.1_F	TR18618|c0_g1_i1	94444	18	1	0	1	18	602	585	0.47	28.8
Solyc02g065090.2.1_F	TR61292|c0_g1_i2	100000	14	0	0	6	19	3747	3734	1.7	27.0
Solyc02g065090.2.1_F	TR54403|c0_g1_i1	100000	14	0	0	4	17	438	425	1.7	27.0
Solyc02g065090.2.1_F	TR11251|c0_g1_i4	100000	14	0	0	5	18	926	913	1.7	27.0
Solyc02g065090.2.1_F	TR11251|c0_g1_i3	100000	14	0	0	5	18	926	913	1.7	27.0
Solyc02g065090.2.1_F	TR11251|c0_g1_i2	100000	14	0	0	5	18	909	896	1.7	27.0
Solyc02g065090.2.1_F	TR11251|c0_g1_i1	100000	14	0	0	5	18	909	896	1.7	27.0
Solyc02g065090.2.1_F	TR70535|c0_g1_i1	93750	16	1	0	4	19	1835	1850	6.1	25.1
Solyc02g065090.2.1_F	TR68416|c0_g1_i2	100000	13	0	0	5	17	859	871	6.1	25.1
Solyc02g065090.2.1_F	TR68416|c0_g1_i1	100000	13	0	0	5	17	862	874	6.1	25.1
Solyc02g065090.2.1_F	TR66822|c0_g1_i1	100000	13	0	0	3	15	916	928	6.1	25.1
Solyc02g065090.2.1_F	TR50662|c0_g2_i4	93750	16	1	0	4	19	270	285	6.1	25.1
Solyc02g065090.2.1_F	TR50662|c0_g2_i3	93750	16	1	0	4	19	270	285	6.1	25.1
Solyc02g065090.2.1_F	TR47712|c0_g2_i16	93750	16	1	0	4	19	2587	2602	6.1	25.1
Solyc02g065090.2.1_F	TR47712|c0_g2_i12	93750	16	1	0	4	19	2593	2608	6.1	25.1
Solyc02g065090.2.1_F	TR47712|c0_g2_i3	93750	16	1	0	4	19	2587	2602	6.1	25.1
Solyc02g065090.2.1_F	TR47687|c0_g1_i1	100000	13	0	0	4	16	1960	1948	6.1	25.1
Solyc02g065090.2.1_F	TR42970|c0_g2_i1	100000	13	0	0	1	13	285	297	6.1	25.1
Solyc02g065090.2.1_F	TR37394|c0_g1_i2	100000	13	0	0	1	13	486	474	6.1	25.1
Solyc02g065090.2.1_F	TR37394|c0_g1_i1	100000	13	0	0	1	13	486	474	6.1	25.1
Solyc02g065090.2.1_F	TR35959|c0_g2_i1	93750	16	1	0	3	18	361	376	6.1	25.1
Solyc02g065090.2.1_F	TR35959|c0_g1_i1	93750	16	1	0	3	18	361	376	6.1	25.1
Solyc02g065090.2.1_F	TR20249|c0_g1_i1	93750	16	1	0	1	16	550	565	6.1	25.1
Solyc02g065090.2.1_F	TR9041|c1_g2_i1	100000	13	0	0	1	13	565	577	6.1	25.1
Solyc02g065090.2.1_F	TR470|c0_g1_i1	89474	19	2	0	1	19	20	38	6.1	25.1
Solyc02g065090.2.1_R	TR49889|c0_g1_i1	90476	21	2	0	1	21	718	738	0.47	28.8
Solyc02g065090.2.1_R	TR11315|c0_g3_i1	100000	15	0	0	2	16	2212	2226	0.47	28.8
Solyc02g065090.2.1_R	TR43230|c0_g1_i3	100000	14	0	0	5	18	930	917	1.7	27.0
Solyc02g065090.2.1_R	TR43230|c0_g1_i2	100000	14	0	0	5	18	1777	1764	1.7	27.0
Solyc02g065090.2.1_R	TR8464|c0_g1_i3	100000	14	0	0	2	15	419	432	1.7	27.0
Solyc02g065090.2.1_R	TR8464|c0_g1_i2	100000	14	0	0	2	15	528	541	1.7	27.0
Solyc02g065090.2.1_R	TR8464|c0_g1_i1	100000	14	0	0	2	15	528	541	1.7	27.0
Solyc02g065090.2.1_R	TR66794|c0_g1_i4	100000	13	0	0	8	20	507	495	6.1	25.1
Solyc02g065090.2.1_R	TR66794|c0_g1_i3	100000	13	0	0	8	20	536	524	6.1	25.1
Solyc02g065090.2.1_R	TR66794|c0_g1_i2	100000	13	0	0	8	20	556	544	6.1	25.1
Solyc02g065090.2.1_R	TR66794|c0_g1_i1	100000	13	0	0	8	20	527	515	6.1	25.1
Solyc02g065090.2.1_R	TR45601|c0_g1_i5	100000	13	0	0	8	20	1341	1353	6.1	25.1
Solyc02g065090.2.1_R	TR45601|c0_g1_i4	100000	13	0	0	8	20	1419	1431	6.1	25.1
Solyc02g065090.2.1_R	TR45601|c0_g1_i3	100000	13	0	0	8	20	1421	1433	6.1	25.1
Solyc02g065090.2.1_R	TR45601|c0_g1_i2	100000	13	0	0	8	20	1442	1454	6.1	25.1
Solyc02g065090.2.1_R	TR45601|c0_g1_i1	100000	13	0	0	8	20	1522	1534	6.1	25.1
Solyc02g065090.2.1_R	TR43392|c0_g1_i1	100000	13	0	0	4	16	1734	1746	6.1	25.1
Solyc02g065090.2.1_R	TR25602|c0_g1_i2	93750	16	1	0	1	16	280	295	6.1	25.1
Solyc02g065090.2.1_R	TR21412|c0_g1_i1	93750	16	1	0	5	20	1621	1606	6.1	25.1
Solyc02g065090.2.1_R	TR8988|c0_g2_i4	100000	13	0	0	2	14	1113	1101	6.1	25.1
Solyc02g065090.2.1_R	TR8988|c0_g2_i2	100000	13	0	0	2	14	1137	1125	6.1	25.1
Solyc02g065090.2.1_R	TR4688|c0_g1_i1	93750	16	1	0	4	19	1144	1129	6.1	25.1
Solyc10g076510.1.1_F	TR34141|c0_g1_i2	95000	20	1	0	1	20	82	101	0.037	32.5
Solyc10g076510.1.1_F	TR43310|c1_g2_i5	94118	17	1	0	4	20	497	481	1.7	27.0
Solyc10g076510.1.1_F	TR43310|c1_g2_i3	94118	17	1	0	4	20	544	528	1.7	27.0
Solyc10g076510.1.1_F	TR43310|c1_g2_i2	94118	17	1	0	4	20	538	522	1.7	27.0
Solyc10g076510.1.1_F	TR43310|c1_g2_i1	94118	17	1	0	4	20	544	528	1.7	27.0
Solyc10g076510.1.1_F	TR36743|c0_g2_i2	100000	14	0	0	7	20	1284	1271	1.7	27.0
Solyc10g076510.1.1_F	TR36743|c0_g2_i1	100000	14	0	0	7	20	1280	1267	1.7	27.0
Solyc10g076510.1.1_F	TR34141|c0_g1_i1	90000	20	2	0	1	20	88	107	1.7	27.0
Solyc10g076510.1.1_F	TR8321|c0_g3_i2	100000	14	0	0	7	20	238	251	1.7	27.0
Solyc10g076510.1.1_F	TR8321|c0_g3_i1	100000	14	0	0	7	20	238	251	1.7	27.0
Solyc10g076510.1.1_F	TR7816|c0_g1_i1	100000	14	0	0	3	16	479	492	1.7	27.0
Solyc10g076510.1.1_F	TR57207|c0_g1_i2	90000	20	1	1	1	19	1469	1488	6.1	25.1
Solyc10g076510.1.1_F	TR57207|c0_g1_i1	90000	20	1	1	1	19	391	410	6.1	25.1
Solyc10g076510.1.1_F	TR53151|c0_g2_i1	100000	13	0	0	1	13	2076	2088	6.1	25.1
Solyc10g076510.1.1_F	TR44404|c0_g1_i1	100000	13	0	0	8	20	2638	2626	6.1	25.1
Solyc10g076510.1.1_F	TR43233|c0_g1_i2	100000	13	0	0	6	18	1493	1505	6.1	25.1
Solyc10g076510.1.1_F	TR43233|c0_g1_i1	100000	13	0	0	6	18	1613	1625	6.1	25.1
Solyc10g076510.1.1_F	TR36442|c2_g7_i3	100000	13	0	0	8	20	66	54	6.1	25.1
Solyc10g076510.1.1_F	TR31152|c0_g1_i1	93750	16	1	0	5	20	714	729	6.1	25.1
Solyc10g076510.1.1_F	TR31101|c0_g1_i1	100000	13	0	0	4	16	525	537	6.1	25.1
Solyc10g076510.1.1_F	TR25814|c0_g1_i1	100000	13	0	0	8	20	946	934	6.1	25.1
Solyc10g076510.1.1_F	TR8747|c0_g1_i1	94118	17	0	1	5	20	1326	1342	6.1	25.1
Solyc10g076510.1.1_R	TR42578|c1_g1_i3	100000	16	0	0	1	16	1294	1279	0.13	30.7
Solyc10g076510.1.1_R	TR42578|c1_g1_i2	100000	16	0	0	1	16	1296	1281	0.13	30.7
Solyc10g076510.1.1_R	TR34141|c0_g1_i2	94737	19	1	0	1	19	220	202	0.13	30.7
Solyc10g076510.1.1_R	TR34141|c0_g1_i1	94737	19	1	0	1	19	226	208	0.13	30.7
Solyc10g076510.1.1_R	TR57432|c0_g1_i1	100000	15	0	0	1	15	175	161	0.47	28.8
Solyc10g076510.1.1_R	TR36478|c0_g1_i6	94444	18	1	0	2	19	499	516	0.47	28.8
Solyc10g076510.1.1_R	TR36478|c0_g1_i5	94444	18	1	0	2	19	499	516	0.47	28.8
Solyc10g076510.1.1_R	TR36478|c0_g1_i4	94444	18	1	0	2	19	505	522	0.47	28.8
Solyc10g076510.1.1_R	TR36478|c0_g1_i2	94444	18	1	0	2	19	505	522	0.47	28.8
Solyc10g076510.1.1_R	TR36478|c0_g1_i1	94444	18	1	0	2	19	499	516	0.47	28.8
Solyc10g076510.1.1_R	TR34948|c0_g1_i3	100000	15	0	0	3	17	1227	1213	0.47	28.8
Solyc10g076510.1.1_R	TR34948|c0_g1_i2	100000	15	0	0	3	17	1057	1043	0.47	28.8
Solyc10g076510.1.1_R	TR34948|c0_g1_i1	100000	15	0	0	3	17	1069	1055	0.47	28.8
Solyc10g076510.1.1_R	TR10260|c0_g1_i1	100000	15	0	0	3	17	185	199	0.47	28.8
Solyc10g076510.1.1_R	TR39004|c0_g1_i2	100000	14	0	0	2	15	1212	1199	1.7	27.0
Solyc10g076510.1.1_R	TR18579|c0_g1_i1	94118	17	1	0	1	17	221	237	1.7	27.0
Solyc10g076510.1.1_R	TR17613|c0_g1_i1	100000	14	0	0	4	17	791	778	1.7	27.0
Solyc10g076510.1.1_R	TR72004|c0_g1_i1	93750	16	1	0	1	16	229	244	6.1	25.1
Solyc10g076510.1.1_R	TR53859|c0_g1_i1	89474	19	2	0	1	19	295	313	6.1	25.1
Solyc10g076510.1.1_R	TR48035|c0_g1_i1	100000	13	0	0	1	13	458	446	6.1	25.1
Solyc10g076510.1.1_R	TR47655|c0_g1_i1	89474	19	2	0	1	19	1281	1263	6.1	25.1
Solyc10g076510.1.1_R	TR43232|c0_g1_i1	89474	19	2	0	1	19	1966	1948	6.1	25.1
Solyc10g076510.1.1_R	TR42567|c0_g3_i2	100000	13	0	0	7	19	335	323	6.1	25.1
Solyc10g076510.1.1_R	TR36863|c0_g1_i1	93750	16	1	0	1	16	363	378	6.1	25.1
Solyc10g076510.1.1_R	TR34824|c0_g2_i1	100000	13	0	0	7	19	630	618	6.1	25.1
Solyc10g076510.1.1_R	TR34824|c0_g1_i1	100000	13	0	0	7	19	630	618	6.1	25.1
Solyc10g076510.1.1_R	TR31220|c0_g1_i2	89474	19	2	0	1	19	113	131	6.1	25.1
Solyc10g076510.1.1_R	TR31220|c0_g1_i1	89474	19	2	0	1	19	113	131	6.1	25.1
Solyc10g076510.1.1_R	TR18659|c0_g3_i1	100000	13	0	0	1	13	391	403	6.1	25.1
Solyc10g076510.1.1_R	TR18659|c0_g2_i1	100000	13	0	0	1	13	391	403	6.1	25.1
Solyc10g076510.1.1_R	TR17619|c0_g1_i1	100000	13	0	0	7	19	623	611	6.1	25.1
Solyc10g076510.1.1_R	TR7268|c1_g1_i4	100000	13	0	0	3	15	283	271	6.1	25.1
Solyc10g076510.1.1_R	TR1860|c2_g1_i3	100000	13	0	0	4	16	585	573	6.1	25.1
Solyc10g076510.1.1_R	TR1860|c2_g1_i2	100000	13	0	0	4	16	580	568	6.1	25.1
Solyc10g076510.1.1_R	TR1860|c2_g1_i1	100000	13	0	0	4	16	586	574	6.1	25.1
Solyc07g065900.2.1_F	TR64426|c0_g1_i2	88000	25	3	0	1	25	1094	1070	0.22	30.7
Solyc07g065900.2.1_F	TR64426|c0_g1_i1	88000	25	3	0	1	25	1038	1014	0.22	30.7
Solyc07g065900.2.1_F	TR34889|c0_g2_i8	100000	15	0	0	9	23	1117	1131	0.79	28.8
Solyc07g065900.2.1_F	TR34889|c0_g2_i7	100000	15	0	0	9	23	1114	1128	0.79	28.8
Solyc07g065900.2.1_F	TR34889|c0_g2_i6	100000	15	0	0	9	23	1120	1134	0.79	28.8
Solyc07g065900.2.1_F	TR34889|c0_g2_i5	100000	15	0	0	9	23	1117	1131	0.79	28.8
Solyc07g065900.2.1_F	TR34889|c0_g2_i4	100000	15	0	0	9	23	1120	1134	0.79	28.8
Solyc07g065900.2.1_F	TR34889|c0_g2_i3	100000	15	0	0	9	23	1117	1131	0.79	28.8
Solyc07g065900.2.1_F	TR34889|c0_g2_i2	100000	15	0	0	9	23	1114	1128	0.79	28.8
Solyc07g065900.2.1_F	TR34889|c0_g2_i1	100000	15	0	0	9	23	1117	1131	0.79	28.8
Solyc07g065900.2.1_F	TR7323|c1_g2_i1	100000	15	0	0	2	16	529	543	0.79	28.8
Solyc07g065900.2.1_F	TR58454|c0_g1_i1	100000	14	0	0	8	21	588	575	2.8	27.0
Solyc07g065900.2.1_F	TR42781|c0_g1_i2	100000	14	0	0	12	25	640	627	2.8	27.0
Solyc07g065900.2.1_F	TR31673|c0_g1_i2	100000	14	0	0	6	19	963	976	2.8	27.0
Solyc07g065900.2.1_F	TR31673|c0_g1_i1	100000	14	0	0	6	19	891	904	2.8	27.0
Solyc07g065900.2.1_F	TR23862|c0_g1_i4	100000	14	0	0	1	14	2331	2344	2.8	27.0
Solyc07g065900.2.1_F	TR19478|c0_g1_i2	94118	17	1	0	1	17	221	237	2.8	27.0
Solyc07g065900.2.1_F	TR19478|c0_g1_i1	94118	17	1	0	1	17	874	890	2.8	27.0
Solyc07g065900.2.1_R	TR60419|c0_g1_i1	100000	15	0	0	7	21	1231	1245	0.47	28.8
Solyc07g065900.2.1_R	TR17556|c0_g1_i1	100000	15	0	0	3	17	747	761	0.47	28.8
Solyc07g065900.2.1_R	TR60418|c0_g1_i3	100000	14	0	0	7	20	1836	1849	1.7	27.0
Solyc07g065900.2.1_R	TR60418|c0_g1_i1	100000	14	0	0	7	20	1836	1849	1.7	27.0
Solyc07g065900.2.1_R	TR50608|c0_g1_i3	94118	17	1	0	3	19	1211	1227	1.7	27.0
Solyc07g065900.2.1_R	TR35262|c0_g1_i1	100000	14	0	0	7	20	284	297	1.7	27.0
Solyc07g065900.2.1_R	TR25096|c2_g1_i1	100000	14	0	0	7	20	267	280	1.7	27.0
Solyc07g065900.2.1_R	TR5833|c0_g3_i3	100000	14	0	0	4	17	617	604	1.7	27.0
Solyc07g065900.2.1_R	TR68797|c0_g1_i2	100000	13	0	0	8	20	977	989	6.1	25.1
Solyc07g065900.2.1_R	TR68797|c0_g1_i1	100000	13	0	0	8	20	1013	1025	6.1	25.1
Solyc07g065900.2.1_R	TR55717|c0_g1_i1	100000	13	0	0	3	15	903	915	6.1	25.1
Solyc07g065900.2.1_R	TR43368|c0_g2_i12	94118	17	0	1	2	17	2300	2316	6.1	25.1
Solyc07g065900.2.1_R	TR43368|c0_g2_i9	94118	17	0	1	2	17	2299	2315	6.1	25.1
Solyc07g065900.2.1_R	TR43368|c0_g2_i4	94118	17	0	1	2	17	2333	2349	6.1	25.1
Solyc07g065900.2.1_R	TR43368|c0_g2_i3	94118	17	0	1	2	17	930	946	6.1	25.1
Solyc07g065900.2.1_R	TR42541|c2_g1_i1	100000	13	0	0	7	19	874	862	6.1	25.1
Solyc07g065900.2.1_R	TR38958|c0_g1_i1	100000	13	0	0	9	21	425	413	6.1	25.1
Solyc07g065900.2.1_R	TR36993|c0_g1_i2	93750	16	1	0	5	20	161	146	6.1	25.1
Solyc07g065900.2.1_R	TR36993|c0_g1_i1	93750	16	1	0	5	20	302	287	6.1	25.1
Solyc07g065900.2.1_R	TR34225|c0_g1_i3	100000	13	0	0	7	19	922	934	6.1	25.1
Solyc07g065900.2.1_R	TR34225|c0_g1_i2	100000	13	0	0	7	19	953	965	6.1	25.1
Solyc07g065900.2.1_R	TR34225|c0_g1_i1	100000	13	0	0	7	19	938	950	6.1	25.1
Solyc07g065900.2.1_R	TR32486|c4_g1_i3	100000	13	0	0	6	18	385	373	6.1	25.1
Solyc07g065900.2.1_R	TR32486|c4_g1_i1	100000	13	0	0	6	18	385	373	6.1	25.1
Solyc07g065900.2.1_R	TR11241|c0_g2_i1	100000	13	0	0	8	20	1601	1589	6.1	25.1
Solyc07g065900.2.1_R	TR8042|c0_g1_i1	100000	13	0	0	8	20	259	247	6.1	25.1
Solyc07g065900.2.1_R	TR7307|c0_g1_i2	93750	16	1	0	4	19	624	609	6.1	25.1
Solyc07g065900.2.1_R	TR7307|c0_g1_i1	93750	16	1	0	4	19	645	630	6.1	25.1
Solyc07g065900.2.1_R	TR3718|c0_g2_i1	100000	13	0	0	6	18	347	335	6.1	25.1
Solyc07g065900.2.1_R	TR3718|c0_g1_i1	100000	13	0	0	6	18	347	335	6.1	25.1

## Sheet: Hoja1
Solyc08g066660.1.1_F
Solyc08g066660.1.1_F
Solyc08g066660.1.1_R
Solyc11g066270.1.1_F
Solyc11g066270.1.1_R
Solyc06g068830.1.1_F
Solyc06g068830.1.1_R
Solyc03g062890.2.1_F
Solyc03g062890.2.1_R
Solyc01g103850.2.1_F
Solyc01g103850.2.1_R
Solyc06g072650.1.1_F
Solyc06g072650.1.1_R
Solyc02g093150.2.1_F
Solyc02g065090.2.1_F
Solyc02g065090.2.1_R
Solyc10g076510.1.1_F
Solyc10g076510.1.1_R
Solyc07g065900.2.1_F
Solyc07g065900.2.1_R
