# Supplementary material for: Combining transcriptome analysis and GWAS for identification and validation of marker genes in the Physalis peruviana-Fusarium oxysporum pathosystem
Source: PeerJ. 2021 Mar 22;9:e11135. doi: 10.7717/peerj.11135 (PMC7993016; doi:10.7717/peerj.11135)
Supplement: Supplemental Information 11 [file peerj-09-11135-s011.xlsx]

## Sheet: Table_S7
Supplemental Table S7: Raw data from qRT-PCR experiment.
Gene ID	Genotype	Scale	Replicate	CT
Tubulin	Tolerant	Degree 1	1	25.0833
Tubulin	Tolerant	Degree 1	2	27.1833
Tubulin	Tolerant	Degree 3	1	33.58
Tubulin	Tolerant	Degree 3	2	28.0933
Tubulin	Tolerant	Degree 5	1	32.8867
Tubulin	Tolerant	Degree 5	2	34.72
Tubulin	Susceptible	Degree 1	1	27.2833
Tubulin	Susceptible	Degree 1	2	28.59
Tubulin	Susceptible	Degree 3	1	33.8
Tubulin	Susceptible	Degree 3	2	30.0967
Tubulin	Susceptible	Degree 5	1	28.0833
Tubulin	Susceptible	Degree 5	2	29.2833
Php_TR7902	Tolerant	Degree 1	1	32.36
Php_TR7902	Tolerant	Degree 1	2	34.2367
Php_TR7902	Tolerant	Degree 3	1	34.77
Php_TR7902	Tolerant	Degree 3	2	34.235
Php_TR7902	Tolerant	Degree 5	1	34.965
Php_TR7902	Tolerant	Degree 5	2	34.9133
Php_TR7902	Susceptible	Degree 1	1	33.2933
Php_TR7902	Susceptible	Degree 1	2	32.2167
Php_TR7902	Susceptible	Degree 3	1	35.325
Php_TR7902	Susceptible	Degree 3	2	34.3333
Php_TR7902	Susceptible	Degree 5	1	32.5967
Php_TR7902	Susceptible	Degree 5	2	32.6867
Php_TR3653	Tolerant	Degree 1	1	32.4467
Php_TR3653	Tolerant	Degree 1	2	33.1033
Php_TR3653	Tolerant	Degree 3	1	38.2933
Php_TR3653	Tolerant	Degree 3	2	35.0933
Php_TR3653	Tolerant	Degree 5	1	35.73
Php_TR3653	Tolerant	Degree 5	2	36.0567
Php_TR3653	Susceptible	Degree 1	1	35.9067
Php_TR3653	Susceptible	Degree 1	2	34.68
Php_TR3653	Susceptible	Degree 3	1	35.3733
Php_TR3653	Susceptible	Degree 3	2	38.0967
Php_TR3653	Susceptible	Degree 5	1	35.4567
Php_TR3653	Susceptible	Degree 5	2	34.26
Php_TR69681	Tolerant	Degree 1	1	30.5533
Php_TR69681	Tolerant	Degree 1	2	31.8533
Php_TR69681	Tolerant	Degree 3	1	34.6767
Php_TR69681	Tolerant	Degree 3	2	29.39
Php_TR69681	Tolerant	Degree 5	1	34.34
Php_TR69681	Tolerant	Degree 5	2	34.2533
Php_TR69681	Susceptible	Degree 1	1	29.4467
Php_TR69681	Susceptible	Degree 1	2	29.4067
Php_TR69681	Susceptible	Degree 3	1	34.88
Php_TR69681	Susceptible	Degree 3	2	30.1567
Php_TR69681	Susceptible	Degree 5	1	30.3867
Php_TR69681	Susceptible	Degree 5	2	30.3233
Php_TR3359	Tolerant	Degree 1	1	28.6033
Php_TR3359	Tolerant	Degree 1	2	29.05
Php_TR3359	Tolerant	Degree 3	1	34.61
Php_TR3359	Tolerant	Degree 3	2	29.1933
Php_TR3359	Tolerant	Degree 5	1	36.45
Php_TR3359	Tolerant	Degree 5	2	35.2067
Php_TR3359	Susceptible	Degree 1	1	26.54
Php_TR3359	Susceptible	Degree 1	2	29.2033
Php_TR3359	Susceptible	Degree 3	1	32.885
Php_TR3359	Susceptible	Degree 3	2	30.45
Php_TR3359	Susceptible	Degree 5	1	27.9867
Php_TR3359	Susceptible	Degree 5	2	28.96
Php_TR46393	Tolerant	Degree 1	1	31.7867
Php_TR46393	Tolerant	Degree 1	2	31.5067
Php_TR46393	Tolerant	Degree 3	1	34.9267
Php_TR46393	Tolerant	Degree 3	2	31.7533
Php_TR46393	Tolerant	Degree 5	1	NA
Php_TR46393	Tolerant	Degree 5	2	33.6033
Php_TR46393	Susceptible	Degree 1	1	31.8033
Php_TR46393	Susceptible	Degree 1	2	33.05
Php_TR46393	Susceptible	Degree 3	1	33.8367
Php_TR46393	Susceptible	Degree 3	2	34.2733
Php_TR46393	Susceptible	Degree 5	1	32.0967
Php_TR46393	Susceptible	Degree 5	2	32.0167
Php_TR8981	Tolerant	Degree 1	1	28.8433
Php_TR8981	Tolerant	Degree 1	2	31.9867
Php_TR8981	Tolerant	Degree 3	1	35.0567
Php_TR8981	Tolerant	Degree 3	2	34.78
Php_TR8981	Tolerant	Degree 5	1	34.4033
Php_TR8981	Tolerant	Degree 5	2	37.17
Php_TR8981	Susceptible	Degree 1	1	30.1233
Php_TR8981	Susceptible	Degree 1	2	34.4133
Php_TR8981	Susceptible	Degree 3	1	34.4633
Php_TR8981	Susceptible	Degree 3	2	32.71
Php_TR8981	Susceptible	Degree 5	1	31.7
Php_TR8981	Susceptible	Degree 5	2	34.5
Php_TR64396	Tolerant	Degree 1	1	26.18
Php_TR64396	Tolerant	Degree 1	2	29.14
Php_TR64396	Tolerant	Degree 3	1	32.06
Php_TR64396	Tolerant	Degree 3	2	30.4567
Php_TR64396	Tolerant	Degree 5	1	34.41
Php_TR64396	Tolerant	Degree 5	2	34.4233
Php_TR64396	Susceptible	Degree 1	1	26.4933
Php_TR64396	Susceptible	Degree 1	2	28.23
Php_TR64396	Susceptible	Degree 3	1	31.7467
Php_TR64396	Susceptible	Degree 3	2	29.5133
Php_TR64396	Susceptible	Degree 5	1	27.8567
Php_TR64396	Susceptible	Degree 5	2	29.7933
Solyc08g066660.1.1	Tolerant	Degree 1	1	29.51
Solyc08g066660.1.1	Tolerant	Degree 1	2	30.6833
Solyc08g066660.1.1	Tolerant	Degree 3	1	NA
Solyc08g066660.1.1	Tolerant	Degree 3	2	31.5633
Solyc08g066660.1.1	Tolerant	Degree 5	1	NA
Solyc08g066660.1.1	Tolerant	Degree 5	2	35.74
Solyc08g066660.1.1	Susceptible	Degree 1	1	32.0433
Solyc08g066660.1.1	Susceptible	Degree 1	2	32.2433
Solyc08g066660.1.1	Susceptible	Degree 3	1	35.61
Solyc08g066660.1.1	Susceptible	Degree 3	2	32.9467
Solyc08g066660.1.1	Susceptible	Degree 5	1	32.26
Solyc08g066660.1.1	Susceptible	Degree 5	2	31.6133
